# Supplementary material for: Reproducible single-cell annotation of programs underlying T cell subsets, activation states and functions
Source: Springer Nature journal article supplement (doi:10.1038/s41592-025-02793-1), 2025-09-01
Supplement: MOESM1 [file 41592_2025_2793_MOESM1_ESM.pdf]

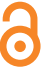

---

# Reproducible single-cell annotation of programs underlying T cell subsets, activation states and functions

---

In the format provided by the authors and unedited

---

# Supplementary Note

## Labeling cGEPs using gene sets

We compared cGEPs with gene-sets from the gene ontology database<sup>1</sup> and from T cell polarization experiments<sup>2</sup> (**Methods, Supplementary Table 3**). We found that the Th2-Resting and Th2-Activated cGEPs were the most significantly enriched for genes upregulated following 16 hour stimulations of naive T cells with Th2 polarizing cytokines (Fisher Exact Test OR=22.7, 16.2,  $P=4.9 \times 10^{-5}$ ,  $1.7 \times 10^{-4}$ , respectively). Gene set analysis also helped annotate 5 cGEPs corresponding to non-T cell specific cellular functions: early and late cell cycle S-phase ( $P=3 \times 10^{-56}$  for DNA\_REPLICATION and  $P=2 \times 10^{-55}$  for MITOTIC\_CELL\_CYCLE), G2M-phase ( $P=9 \times 10^{-74}$  CELL DIVISION), interferon stimulated genes ( $P=1 \times 10^{-59}$  for RESPONSE TO VIRUS), and translation ( $P=4 \times 10^{-163}$  for GOCC\_CYTOSOLIC\_RIBOSOME).

## Description of immediate early gene (IEG) gene sets

We labeled three correlated cGEPs as immediate early gene programs (IEG, IEG2, IEG3, pairwise R of 0.45-0.70). The top genes include the canonical IEGs including *FOS*, *JUN*, and *ZFP36*, and these cGEPs were all enriched for a published IEG gene set<sup>3</sup> (Fisher Exact Test  $P < 1 \times 10^{-53}$ ). We suspect that IEG represents the core pathway as it was found in 6 out of 7 datasets (**Fig. 1c**) whereas IEG2 and IEG3 represent mixtures with delayed immediate and secondary response genes. We hypothesize that these cGEPs reflect sample processing artifacts in scRNA-Seq, since IEGs are induced in as few as 30 minutes<sup>4</sup> in response to mitogens or cell stress<sup>5</sup>, and following processing steps like tissue disaggregation<sup>6,7</sup>. As evidence of the potential technical nature of these cGEPs, we calculated their mean usage per sample in T cells, B-cells, NK-cells and monocytes/DCs in the 3 PBMC references. We found that their average usage in T cells correlates with their usage in other cell-types ( $R=0.46-0.99$ , average

0.77, **Supplementary Fig. 4**), suggesting that they are a sample-intrinsic property, which would be expected of a sample-processing effect. However, in certain contexts, these cGEPs may be biologically important.

## Clustering misclassified T cell subsets

In the COMBAT dataset, many CD4 memory subclusters were enriched for functional or artifact-associated cGEPs rather than subset cGEPs (**Supplementary Fig. 6b**). The CD4.Th.mitohi and CD4.Tem.mitohi.1 clusters were driven by high usage of the Poor-Quality cGEP and contained cells expressing multiple subset cGEPs. The CD4.TEM.IFN.resp and CD4.Th.IFN.resp clusters were predominantly driven by the ISG cGEP. The CD4.TEM.IFN.resp cluster had high usage of the cytotoxic and TEMRA cGEPs while the CD4.Th.IFN.resp cluster contained cells expressing many subset cGEPs including CD4-Naive (**Fig. 3b, Extended Data Fig. 4b**). Cells with high usage of the CD4-Naive cGEP expressed CD4 naive markers including CD45RA and *SELL*, confirming that clustering misclassified them as memory T cells (**Supplementary Fig. 6c-e**).

## Description of cGEPs associated with antigen-specific activation in the AIM-Seq assay

Many suspected functional AIM-associated cGEPs included well known markers of T cell activation in their top weighted genes. We provide a brief description of these cGEPs below:

- CTLA4/CD38 showed the most upregulation in Tregs and CD4 memory cells (**Fig. 4F**) and is characterized by the CD278 and CD38 activation markers and the anti-

inflammatory genes *CTLA4* and *IL10*. It may thus reflect an inhibitory activation response.

- ICOS/CD38 included the known T cell activation markers CD278, CD71, and CD38 and showed the most upregulation with activation in conventional CD4 and CD8 T cells.
- OX40/EBI3 was identified specifically in tissues and was most common in tumor-infiltrating T-cells (Figure 1B, Supplementary Figure 7c-d). It is the only of these functional AIM-associated cGEPs to include *CXCL13*, a marker of tumor-reactivity and a B cell chemoattractant (**Supplementary Fig. 7c**). It also includes other activation markers such as *TNFRSF4* (encoding OX40) and *IL2RA* (encoding CD25).
- TIMD4/TIM3 is most expressed in MAIT, gdT, and CD8 memory T-cells and is characterized by expression of CD38 protein and RNA and cytotoxicity genes (*GZMB*, *GZMA*, *GNLY*), likely representing a cytotoxic activation response.
- NME1/FABP5 was broadly upregulated across all lineages. It is most strongly marked by expression of the *NME1* endonuclease encoded gene that was previously associated with T cell activation<sup>8</sup>.
- Multi-cytokine was most strongly upregulated in CD8 memory cells and is most strongly marked by cytokine and chemokine encoding genes such as *IFNG*, *TNF*, *XCL1*, *IL2*, *CCL4*, *CCL4L2*, and *CCL3*.
- Th17-Activated is strongly marked by *IL26*, *IL17A*, *IL17F*, and *IL22* expression, encoding cytokines secreted by activated Th17 cells.

- Th2-Activated is marked by expression of *IL5*, *IL13*, and *IL4*, encoding cytokines secreted by activated Th2 cells.

## Analysis of cGEPs associated with Covid-19

We tested cGEP associations with Covid-19 in two PBMC-derived T cell datasets, UK-Covid (80 Covid-19, 21 healthy donors, **Extended Data Fig. 7c**) and COMBAT (77 Covid-19, 10 healthy donors, **Extended Data Fig. 7d**), using pseudobulk sample-level regression (**Methods**). We observed overall concordant cGEP associations (Pearson  $R=0.64$ ,  $P=2.8 \times 10^{-7}$ , **Extended Data Fig. 7e**). Consistent with the key role of interferon in viral infections<sup>8,9</sup>, ISG was the most upregulated cGEP in both datasets ( $Q < 0.05$ ). AIM-associated functional cGEPs including exhaustion, cell cycle, TIMD4/TIM3, OX40/EBI3, NME1/FABP5, and CTLA4/CD38 were upregulated in acute Covid-19, consistent with viral activation of T cells ( $Q < 0.05$ , both datasets). We also found increased Tph cGEP usage in Covid-19 relative to controls, consistent with recent demonstration of increased abundance of this subset in infection ( $Q < 1 \times 10^{-8}$ , both datasets)<sup>10</sup>. An intriguing novel finding is that the Th1-like cGEP was negatively associated with Covid-19 in both datasets ( $Q < 1 \times 10^{-4}$ ). This was seen within manually gated CD4 CM ( $Q = 1.1 \times 10^{-4}$ ) and CD4 EM subsets ( $Q = 4.5 \times 10^{-6}$ ), suggesting it is not due to differential abundance of circulating memory CD4 T cells. Immediate early gene cGEPs (IEG1, IEG2, IEG3) were also significantly associated with Covid-19 in COMBAT ( $Q < 1 \times 10^{-5}$ ) but not UK-Covid ( $P > 0.5$ ), perhaps related to sample processing differences (see prior section on IEG cGEPs).

## Analysis of cGEPs associated with RA

Next, we identified cGEPs associated with inflamed synovial tissue in rheumatoid arthritis (RA) using the AMP-RA dataset, which includes synovial biopsies from 70 RA and 8 osteoarthritis (OA) patients (**Extended Data Fig. 7f**)<sup>11</sup>. Ten out of the eleven significantly associated cGEPs were AIM-associated, including metallothionein, ISG, Tph, HLA, ICOS/CD38, Exhaustion, and all

three cell cycle cGEPs ( $Q < 0.05$  all). Of note, Metallothionein was shown to be increased in the plasma of RA patients and within the synovia of mouse models of RA<sup>12</sup>. The Tph association is consistent with prior observations by us and others of Tph enrichment within RA synovia<sup>13</sup>. The Th22 cGEP was also associated with RA ( $Q = 0.0027$ ), confirming a prior observation of increased Th22 cell abundance in RA synovia, where they may stimulate osteoclasts<sup>14</sup>.

## Analysis of Tph usage and plasma cells in cancer

Within the primary pan-cancer dataset, we found that the average Tph usage per sample was correlated with the expression of the B-cell chemoattractant *CXCL13* ( $R = 0.67$ ,  $P = 1.2 \times 10^{-30}$ , **Supplementary Fig. 9c**). This correlation was stronger in tumor ( $R = 0.69$ ,  $P = 1.2 \times 10^{-13}$ ) than normal samples ( $R = 0.34$ ,  $P = 0.021$ ). We hypothesized that average Tph usage would correlate with plasma cell abundance in tumors. To test this, we re-analyzed a published pan-cancer dataset containing other cell-types besides T cells from 148 primary tumors, 53 matched adjacent tissues, and 25 healthy donor samples<sup>15</sup>. Tph usage and *CXCL13* expression remained correlated in this dataset ( $R = 0.67$ ,  $P = 1.2 \times 10^{-30}$ , **Supplementary Fig. 9d**). Average Tph, Tfh-1, and Tfh-2 cGEP usage were significantly correlated with plasma cell percentage within the tumors (Spearman  $\rho = 0.23$ ,  $0.34$ ,  $0.28$ , respectively,  $P < 1 \times 10^{-2}$ , **Supplementary Fig. 9e**). In a multivariate regression across all samples, Tfh-1 and Tph usage were independently associated with plasma cell abundance ( $P = 0.042$ ,  $P = 0.051$  respectively). Subsetting to non-tumor samples, Tfh-1 and Tfh-2 remained statistically significant ( $P = 0.017$ ,  $P = 0.027$ , respectively), but Tph was no longer significant ( $P = 0.351$ ). These findings suggest that Tph cells are functional within tumors and are associated with increased abundance of plasma cells.

# Supplementary Figures

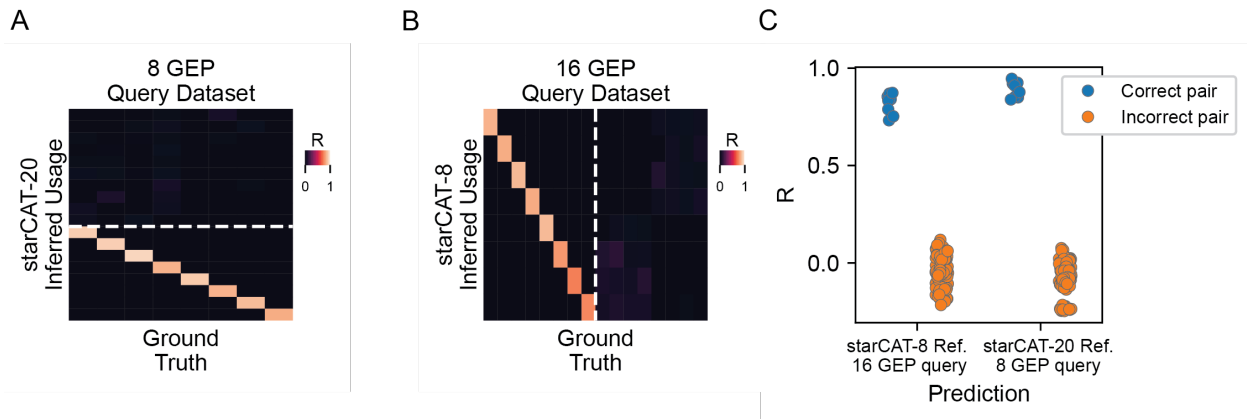

**Supplementary Figure 1. Additional starCAT simulation analyses.** **a**, Pearson correlation of ground truth simulated usages of each GEP (columns) vs inferred usages (rows) for starCAT using a simulated 20 GEP reference to predict an 8 GEP query dataset, where the 8 GEPs overlap with the reference. **b**, Same as A but using an 8 GEP reference and a 16 GEP query dataset, containing 8 overlapping GEPs. **c**, Extracted Pearson correlation values from **a** and **b** where dot color indicates whether an inferred GEP matched the ground truth.

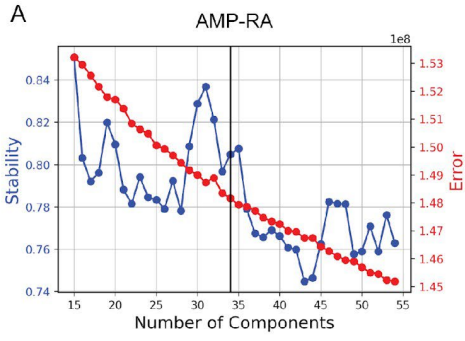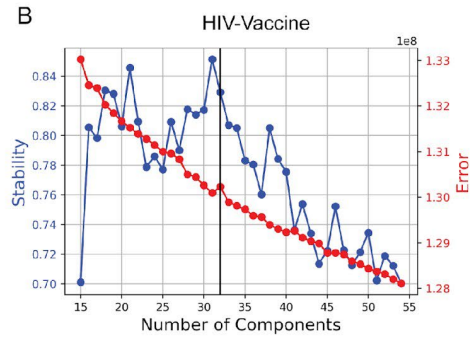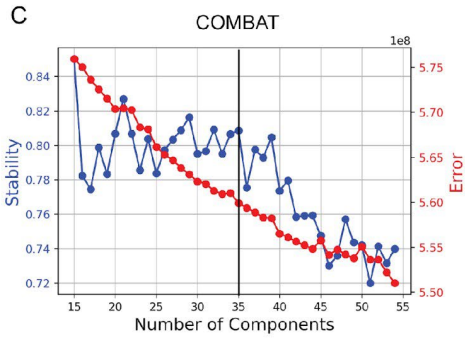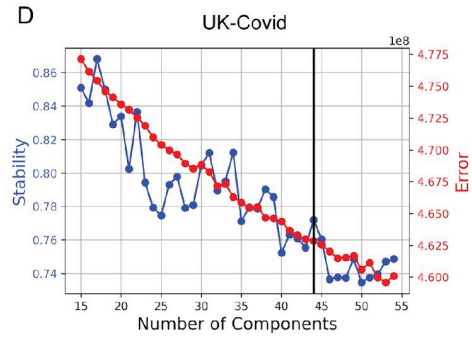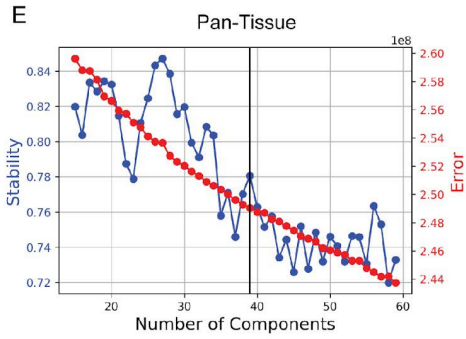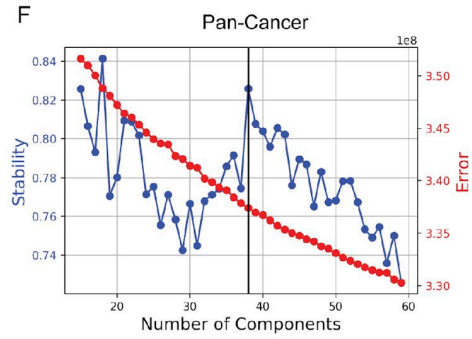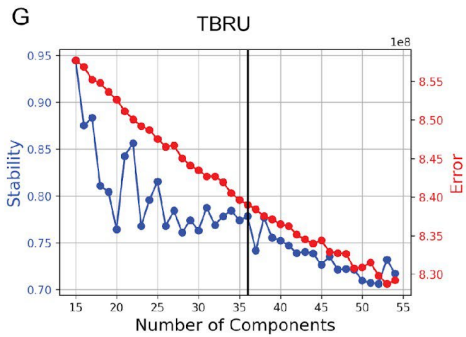

**Supplementary Figure 2. K selection plots for consensus non-negative matrix factorization (cNMF) runs on reference datasets. Vertical line denotes the selected number of**

components. Frobenius error is shown in red and average Silhouette score across consensus clusters is shown in blue.



**Supplementary Figure 3. Example marker genes for all cGEPs.** Color indicates average cNMF gene score, which denotes how much 1 additional count of unnormalized usage would be expected to increase Z-scored gene expression.

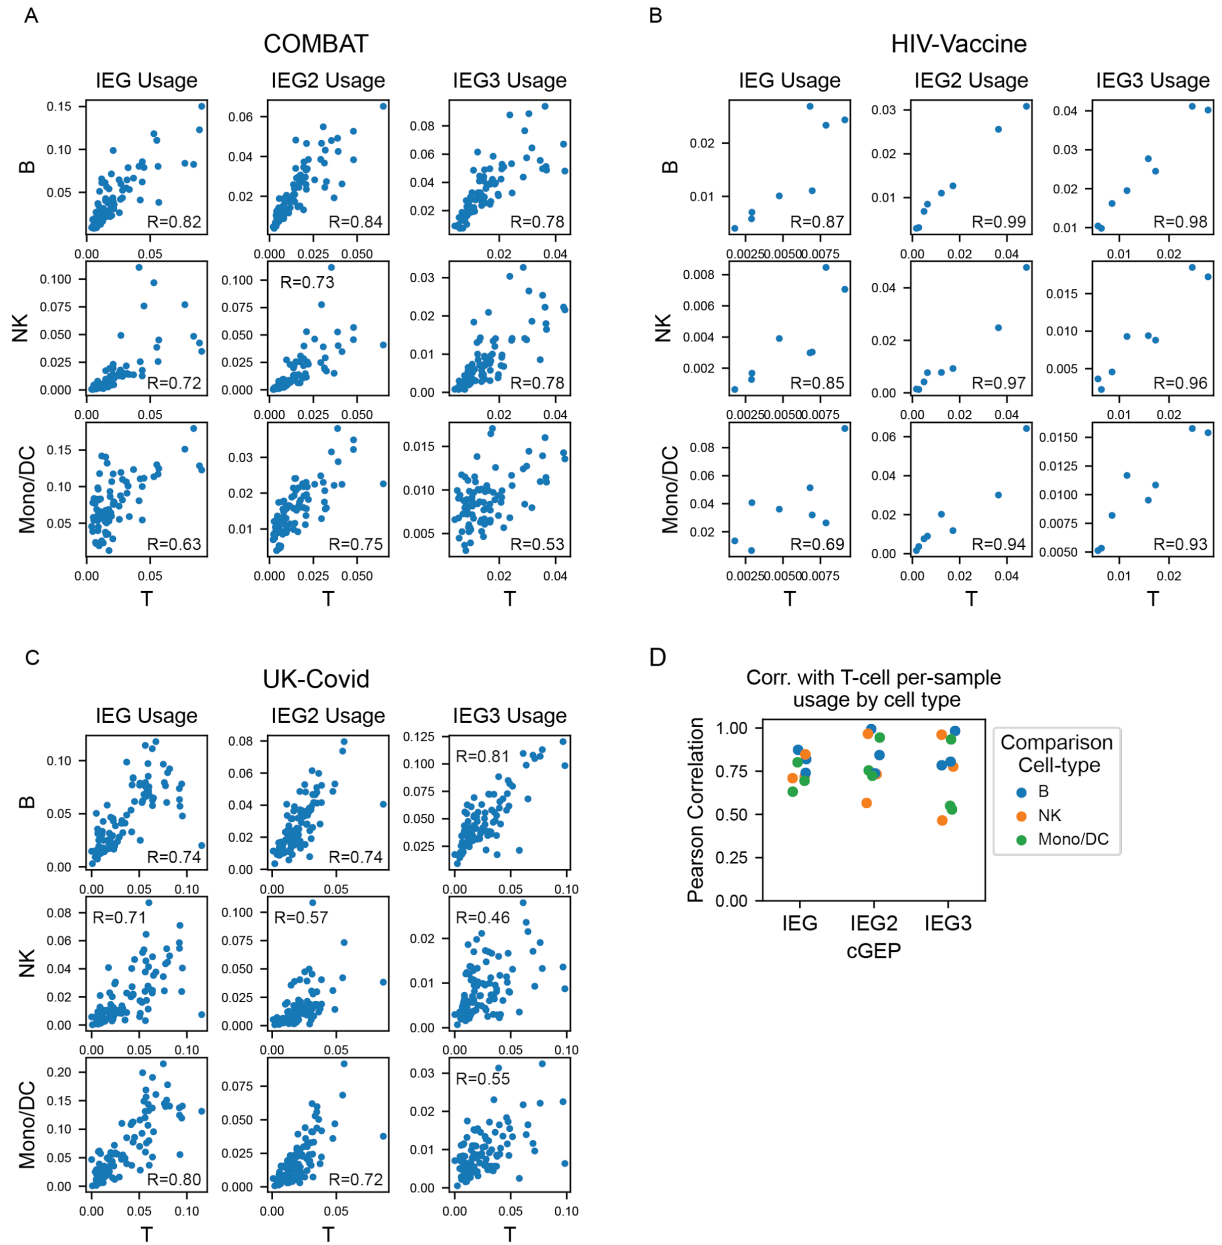

**Supplementary Figure 4. Immediate early gene usage across circulating blood cell types.**

**a-c**, Average per-sample usage of each IEG cGEP in T cells versus monocytes and dendritic cells, NK cells, or B-cells, in the three reference PBMC datasets. **d**, Correlation of per-sample average cGEP usage in T cells with that in B-cells, NK-cells for the 3 immediate early gene cGEPs, in the same datasets.

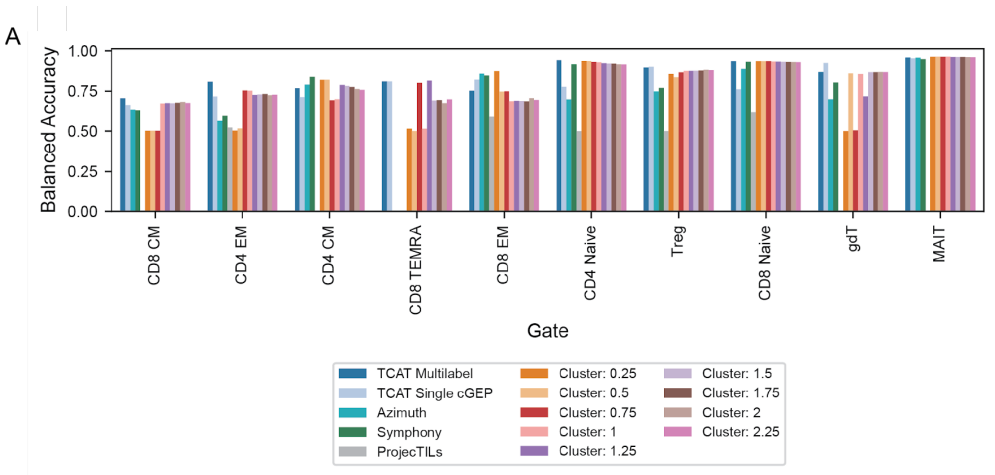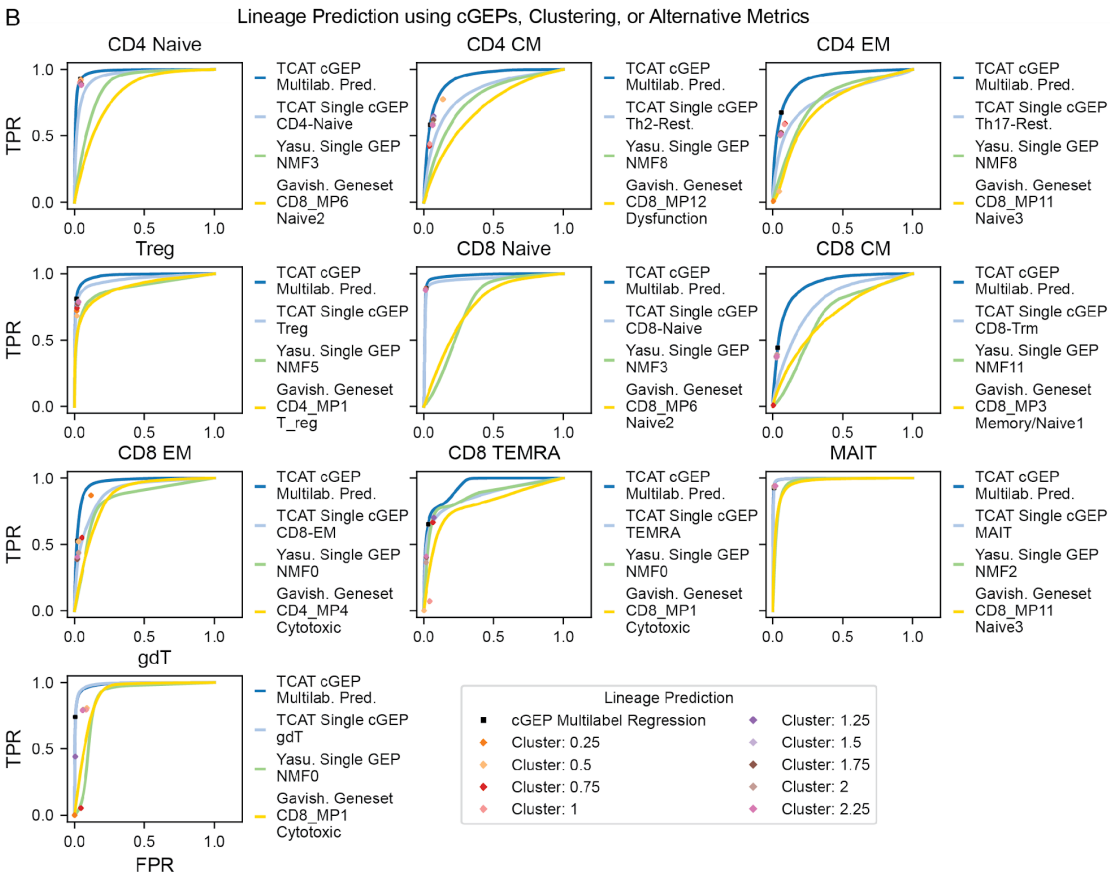

**Supplementary Figure 5. Additional TCAT benchmark analyses.** **a**, Comparison of TCAT, Azimuth, Symphony, ProjecTILs, and clustering with multiple Leiden resolution parameters for predicting manually gated gavish subsets in the Flu-Vaccine dataset. TCAT Single cGEP assigned each cell to the subset that was most associated with its most highly used subset cGEP. Clustering assigned each cell to the subset most associated with its cluster (**Methods**). **b**, Receiver

operator curves (ROCs) for prediction of manually gated subset based on TCAT multilabel prediction (dark blue), a single most associated TCAT cGEP (light blue), analogous predictions using the single most associated NMF component published in Yasumizu et al., 2024<sup>16</sup>, or using gene sets from NMF components in Gavish et al., 2023<sup>17</sup>. Individual points show accuracies of discrete predictions based on cGEP multilabel regression, or clustering with the Leiden resolution specified in the legend.

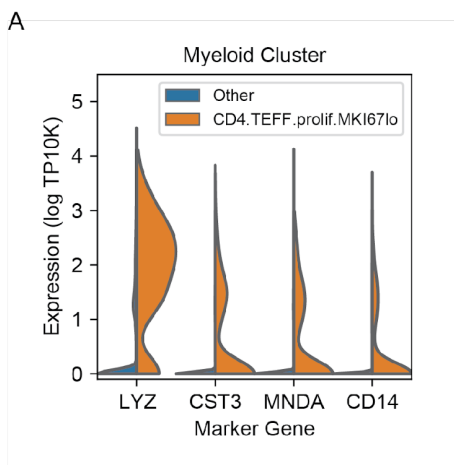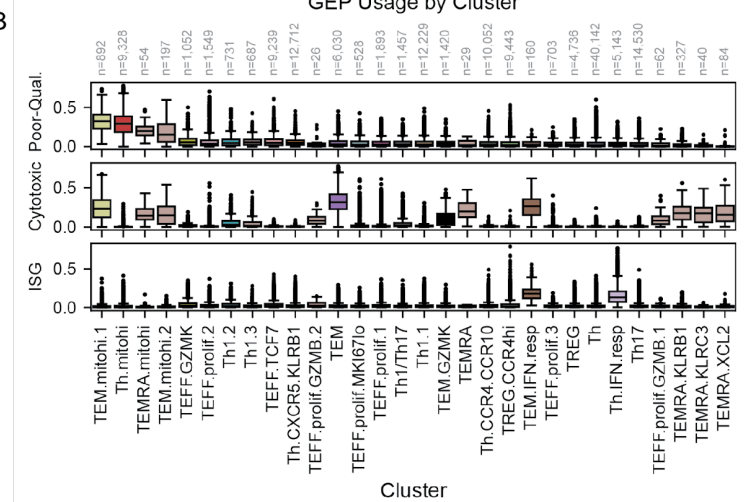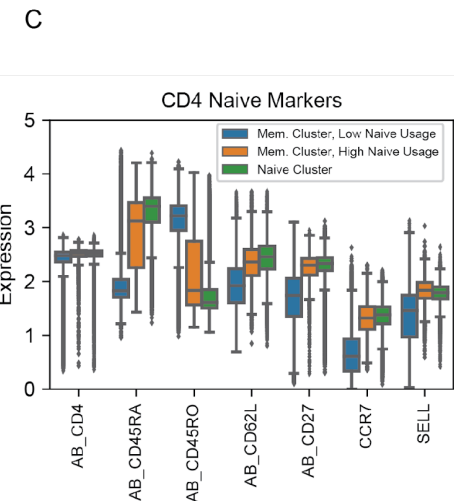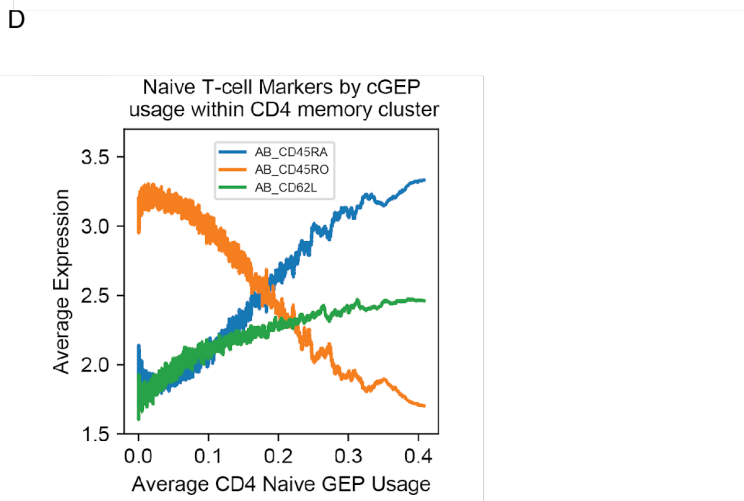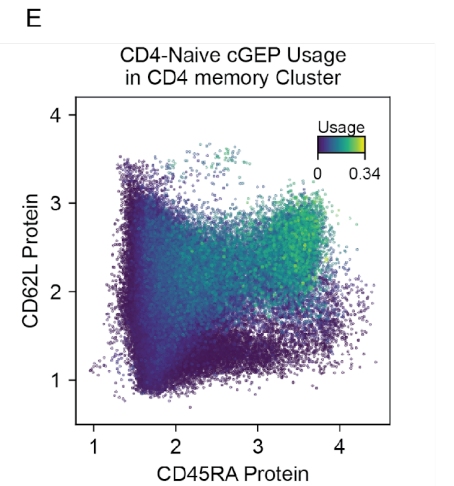

**Supplementary Figure 6. Characterization of COMBAT dataset clustering.** **a**, Violin plot for myeloid cell marker genes in cells originally annotated as CD4 memory T cells broken out by the CD4.TEFF.prolif.MK167lo subcluster, or all other subclusters combined. **b**, Usage of the ISG,

Cytotoxic, and Poor-quality cGEPs in cells stratified by their CD4 memory subcluster. "CD4" is omitted from cluster names for space. Boxes represent the interquartile range and whiskers represent 1.5 x interquartile range. The box center line indicates the median. **c**, Expression of CD4 naive marker genes in cells initially clustered as CD4 memory (blue and orange boxes) or CD4 naive (green cluster). Cells initially clustered as CD4 memory are stratified by their usage of the CD4 naive cGEP with a threshold of 0.1. Boxes represent the interquartile range and whiskers represent 1.5 x interquartile range. The box center line indicates the median. Sample sizes are Mem. Cluster, Low Naive: 140,196 cells; Mem. Cluster, High Naive Usage: 5,279 cells; Naive Cluster: 123,291 cells. **d**, Average expression of naive and memory T cell markers in cells clustered as CD4 memory in a sliding window of 200 cells, ordered by usage of the CD4-Naive cGEP. **e**, Expression of CD45RA and CD62L colored by usage of the CD4-Naive cGEP.

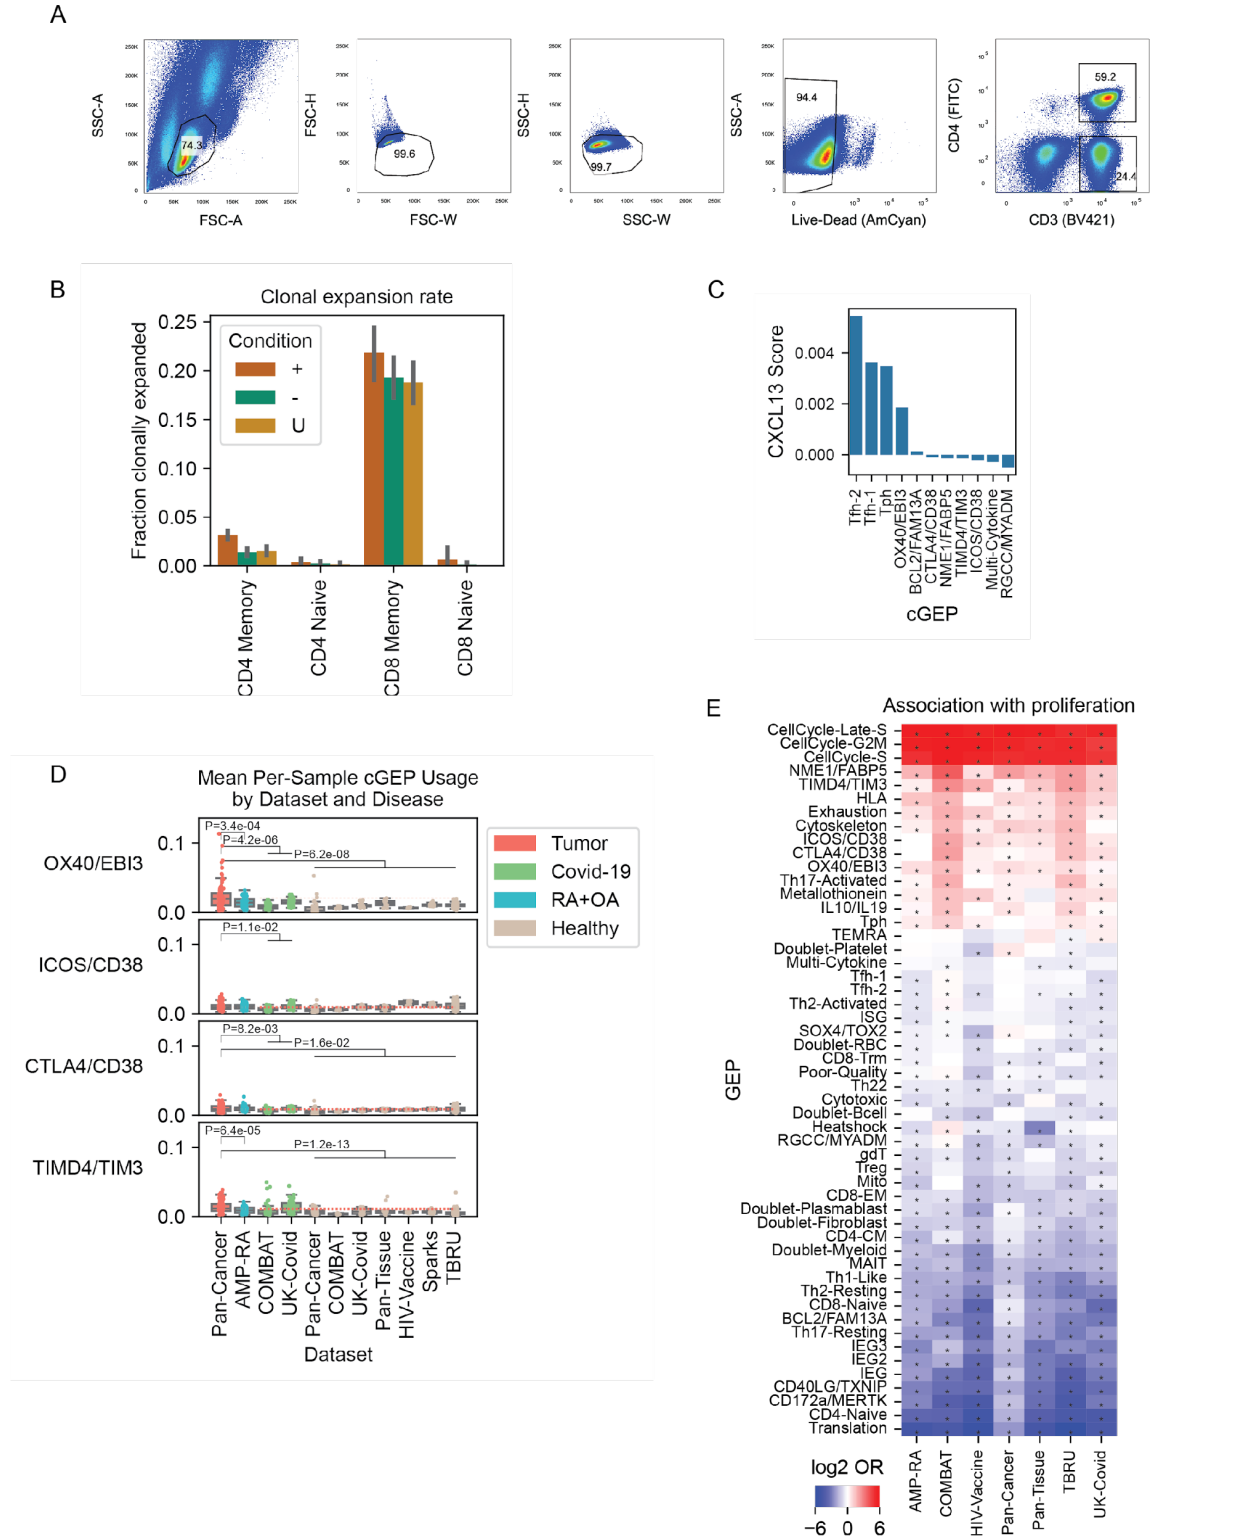

**Supplementary Figure 7. cGEP associations with proliferation across datasets.** **a**, Gating strategy to identify CD3+ CD4+ and CD3+ CD4- populations in the AIM-Seq experiment. **b**, Fraction of clonally expanded T cells stratified by memory vs. naive and by treatment condition.

Clonal expansion is defined as having 2+ T cells in the same donor with the same CDR3 beta chain. Bar value reflects the total observed fraction of expanded clones, while error bars reflect 95 percent bootstrap confidence intervals (1000 bootstraps) around this measurement.

N=12,118 CD4 Memory clones, N=8197 CD4 Naive clones, N=2945 CD8 Memory clones, N=4447 CD8 Naive clones. **c**, Gene weights for *CXCL13* in various cGEPs, including Tfh-1, Tfh-2, Tph (positive controls) and all AIM-associated cGEPs. **d**, Boxplots of mean per-sample usage of the AIM-associated cGEPs used to define ASA, by dataset and by disease. Two-sided T-tests were performed for each cGEP to compare differences between tumor samples and other disease types. P-values are Bonferroni adjusted. Boxes represent the interquartile range and whiskers represent 1.5 x interquartile range. The box center line indicates the median. Number of samples shown include n=89 Tumor/Pan-Cancer; n=81 RA+OA; n=77, n=80, Covid-19 from COMBAT, UK-Covid, respectively; n=47, n=10, n=21, n=12, n=8, n=41, n=259 Healthy from Pan-Cancer, COMBAT, UK-Covid, Pan-Tissue, HIV-Vaccine, Sparks, TBRU, respectively. **e**, Heatmap of the average Log2 ratio of mean usage in proliferating cells (usage>0.1 of proliferation GEPs) and non-proliferating cells (usage<0.1) for all GEPs (rows) and datasets (columns). An absolute value ceiling of 6 is used to aid visualization. \* indicates paired two-sided T-test P<.05.

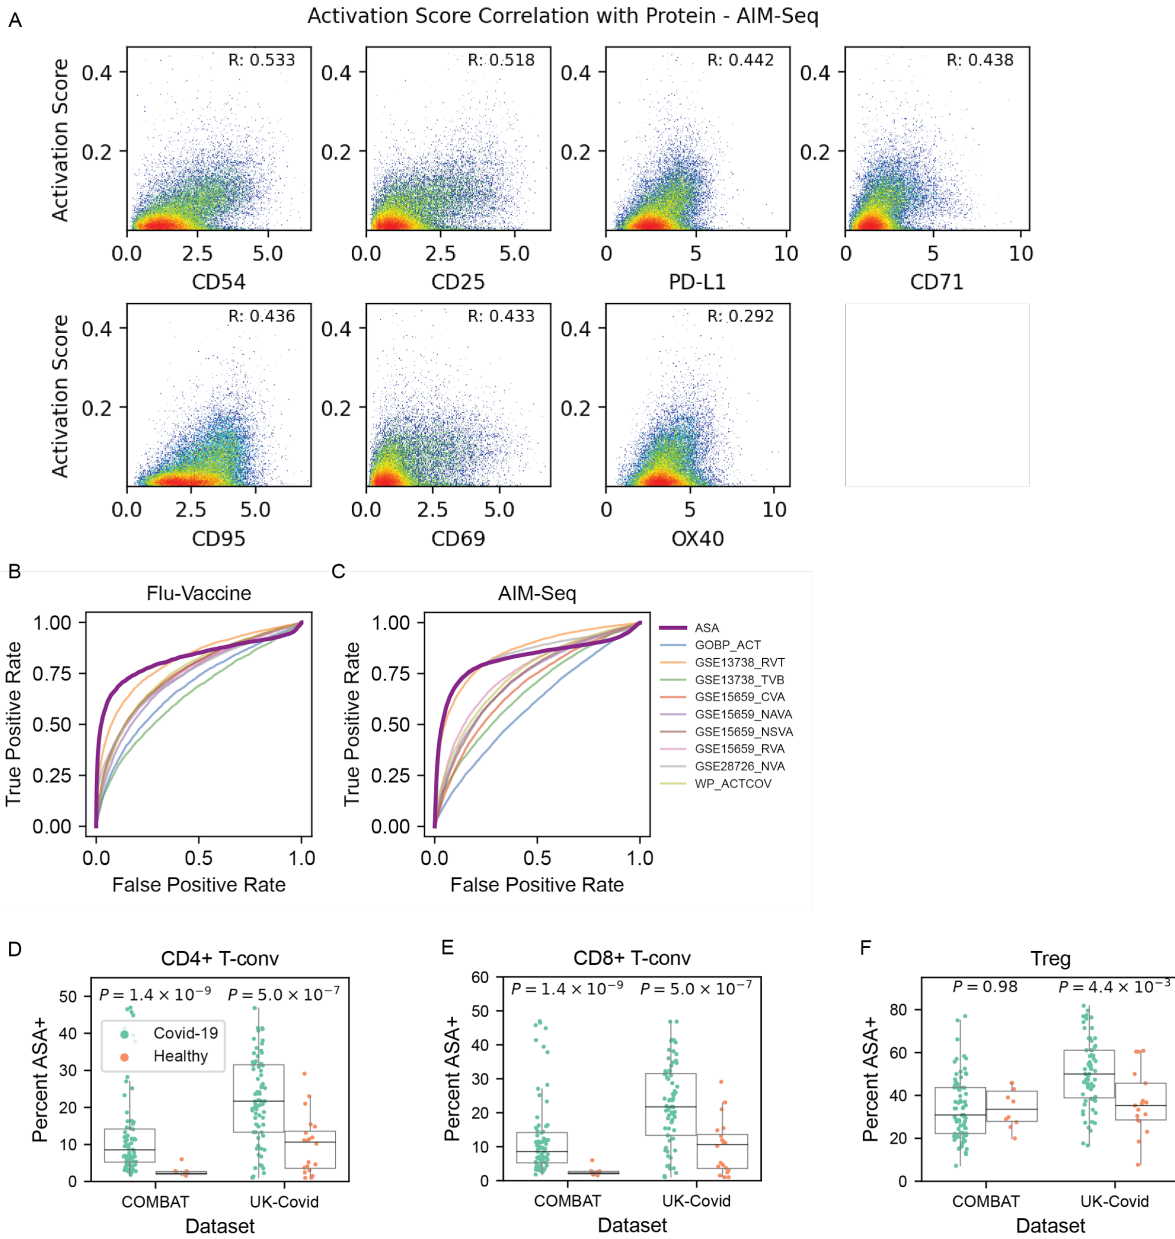

**Supplementary Figure 8. Additional antigen-specific activation analyses. a,**

Antigen-specific activation (ASA) score correlation with surface protein activation markers in the AIM-Seq dataset. **b**, ROC curves for ASA prediction of CD71+CD95+ in the Flu-Vaccine dataset, as compared to prediction using per-cell gene scoring with T cell activation gene sets. **c**, Same as **b** for AIM-positivity prediction in the AIM-Seq dataset. Full gene set names (in order)

are GOBP\_ACTIVATED\_T\_CELL\_PROLIFERATION,  
GSE13738\_RESTING\_VS\_TCR\_ACTIVATED\_CD4\_TCELL\_DN,

GSE13738\_TCR\_VS\_BYSTANDER\_ACTIVATED\_CD4\_TCELL\_UP,  
GSE15659\_CD45RA\_NEG\_CD4\_TCELL\_VS\_ACTIVATED\_TREG\_DN,  
GSE15659\_NAIVE\_CD4\_TCELL\_VS\_ACTIVATED\_TREG\_DN,  
GSE15659\_NONSUPPRESSIVE\_TCELL\_VS\_ACTIVATED\_TREG\_DN,  
GSE15659\_RESTING\_VS\_ACTIVATED\_TREG\_DN,  
GSE28726\_NAIVE\_VS\_ACTIVATED\_CD4\_TCELL\_DN,  
WP\_TCELL\_ACTIVATION\_SARSCOV2. **d-f**, Percentage of activated CD4 Convs, CD8 Convs,  
and Tregs based on  $ASA > 0.065$  in Covid-19 and healthy control samples from COMBAT and  
UK-Covid datasets. Boxes represent the interquartile range and whiskers represent 95%  
quantile range. P-values are from a T-test of pseudobulk per-sample average usage between  
Covid-19 and healthy samples (COMBAT: n=77 Covid-19, 10 Healthy, UK-Covid: n=80  
Covid-19, 21 Healthy).

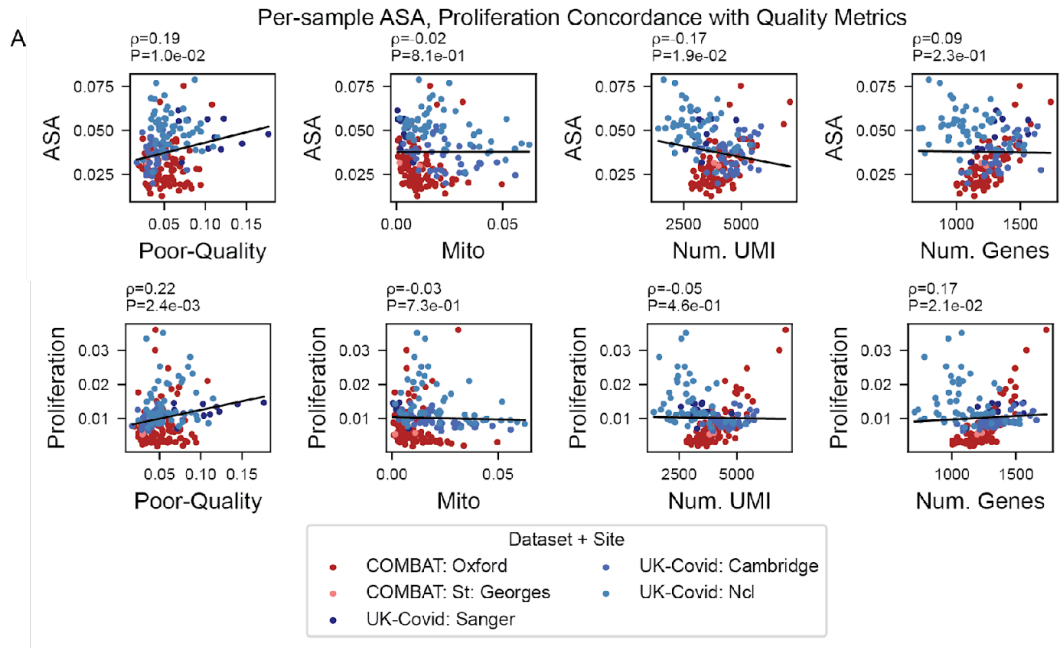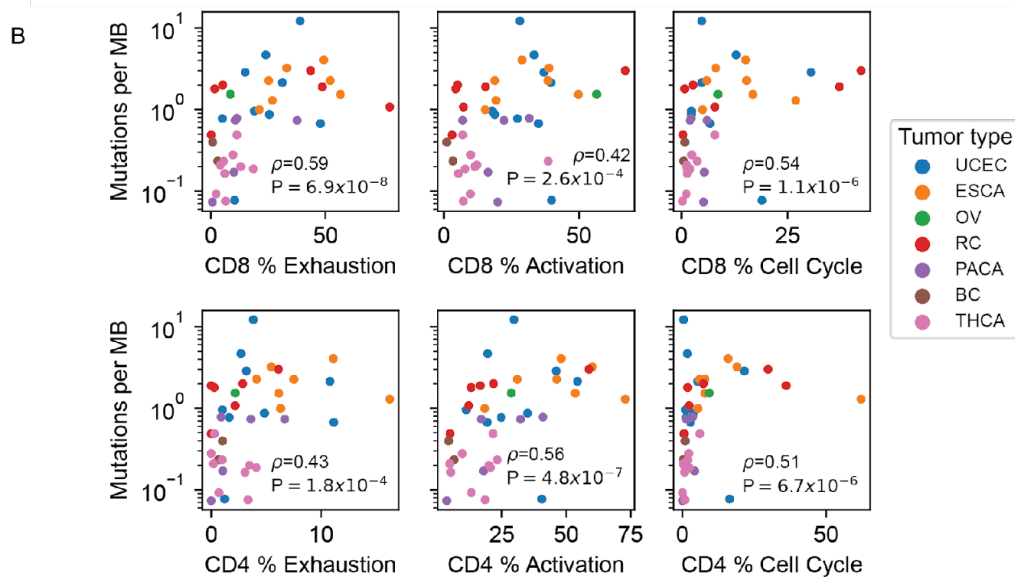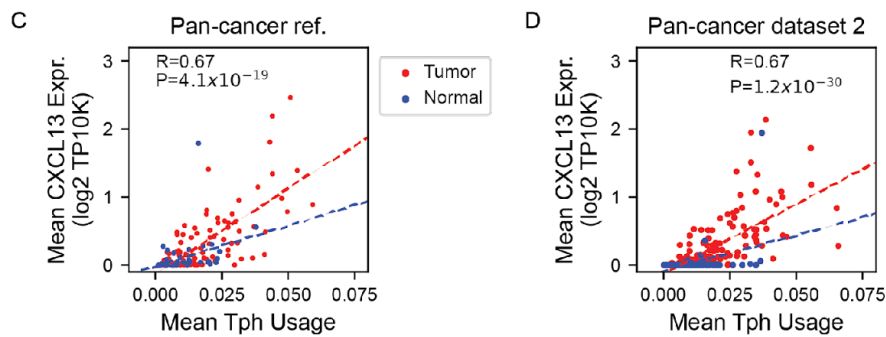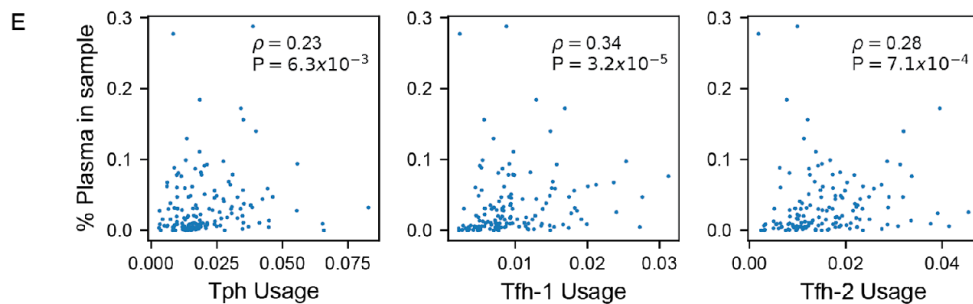

**Supplementary Figure 9. Additional activation analyses and Tph/Tfh cells in cancer. a,**

Per-sample scatterplots showing concordance between mean antigen-specific activation (ASA) score (top) or proliferation (bottom) and various quality metrics, across datasets and sites. Spearman correlation and two-sided P-values are shown.

**b,** Per-individual scatterplots of concordance between tumor mutation burden and percentage of exhausted (left), activated (middle), and proliferating (right) T cells for both CD8 (top) and CD4 (bottom) T cells. Tumor mutation burden is defined as the average number of mutations per MB. Spearman correlation and two-sided P-values are shown.

**c-d,** Average usage of the T peripheral helper (Tph) cGEP compared to average *CXCL13* expression from T cells within tumors and matched normal tissue samples in the primary Pan-cancer reference and Luo et al., 2022<sup>15</sup>. Trend lines show the regression coefficients fit for tumors and normal samples separately. Pearson correlation and two-sided P-values are shown.

**e,** Percentage of cells annotated as plasma cells against the average Tph, Tfh-1, or Tfh-2 usage within T cells from tumor samples in Luo et al., 2022<sup>15</sup>. Spearman correlation and two-sided P-values are shown.

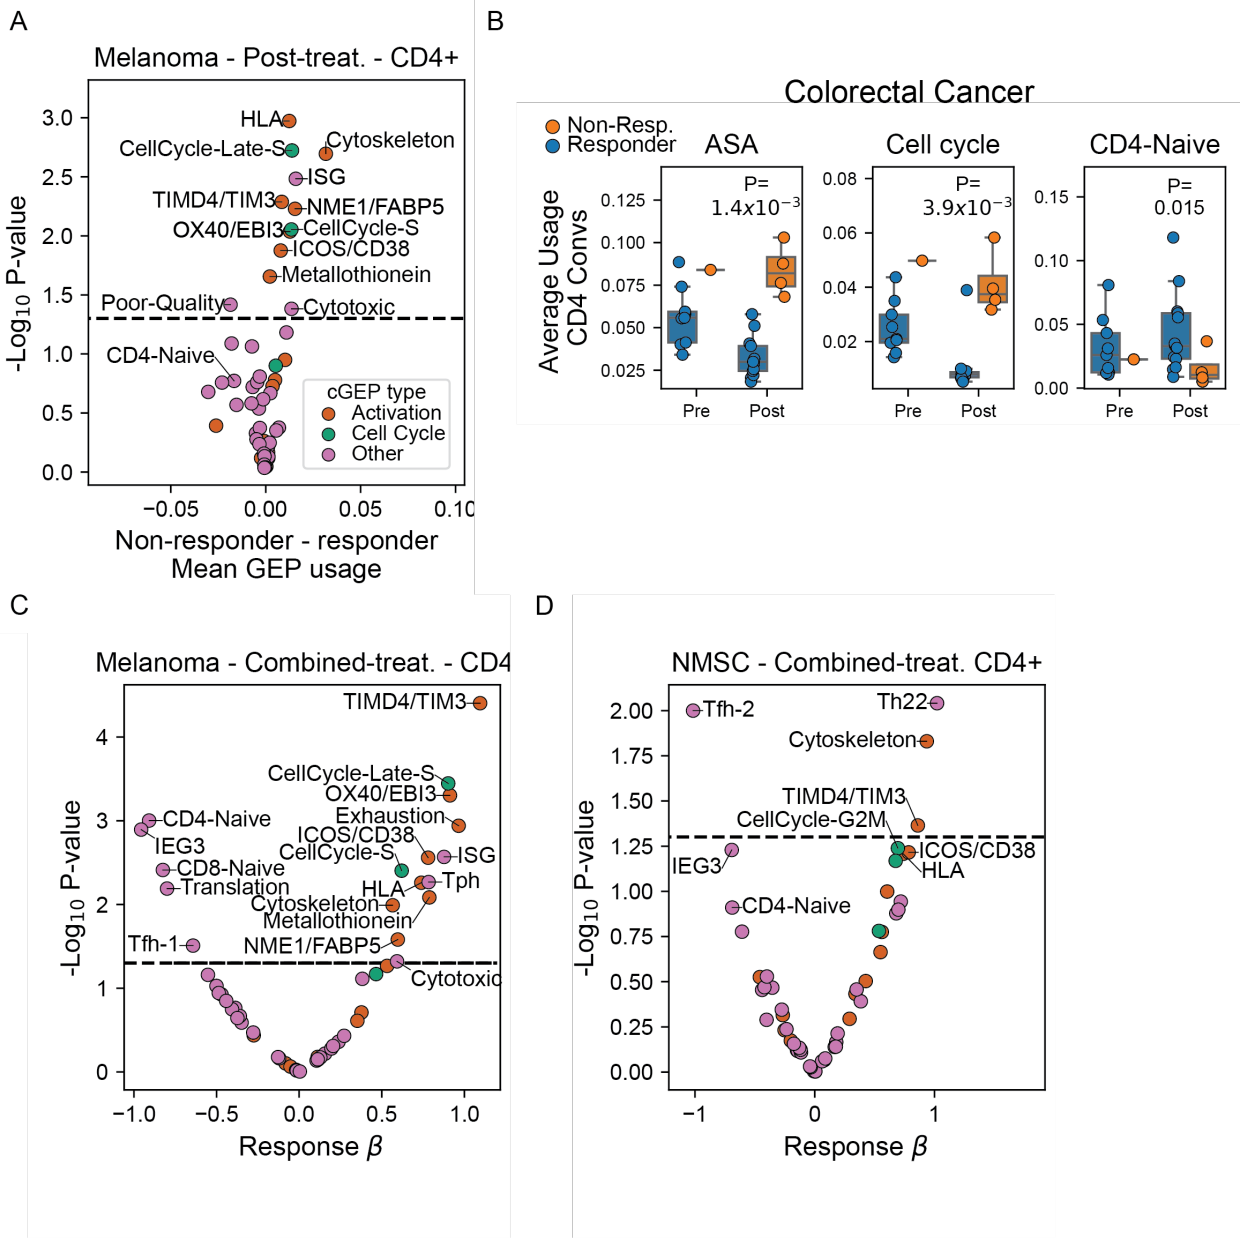

**Supplementary Figure 10. Additional immune checkpoint inhibitor analyses. a,**

Association of cGEP usage with ICI response in CD4 T cells for post-treatment melanoma samples. P-values are from a two-tailed T-test. Dots are colored by cGEP type. **b,** Average ASA and cell cycle score and CD4-Naive cGEP usage in CD4 T cells from CRC stratified by ICI response (color) and Pre- vs. Post- treatment. P-values are from a one-tailed T-test. Boxes represent the interquartile range and whiskers represent 1.5 x interquartile range. The box

center line indicates the median. **c-d**, Associations of cGEP usage between responders versus non-responders, in CD4 T cells of combined pre- and post- treatment tumors controlling for treatment timepoint and donor of origin as fixed and random effects, respectively. Betas were calculated using a mixed linear model associating pseudobulk average cGEP usage with immunotherapy response. P-values were calculated with a likelihood ratio test.

# Supplementary Tables

**Supplementary Table 1. Dataset Information and cGEP Summary.** The first table contains a summary of each reference dataset analyzed. The second table contains a summary of cGEPs including their full name, abbreviated name, assigned class, top 3 most strongly associated genes, and which datasets they were derived from.

**Supplementary Table 2. Marker genes.** Top 200 marker genes for each cGEP ranked by average Z-score normalized gene spectra score with cells colored by this score.

**Supplementary Table 3. Gene-set enrichment.** The “GO\_Enrichment” tab includes the top 10 associated gene sets for each cGEP including the GEP name, gene-set name, fisher exact test odds ratio, and P-value. The subsequent tabs include the same information but for enrichment tests for gene sets defined from a dataset that polarized T cells for either 16 hours (16h) or 5 days (5d) starting from either naive (TN) or memory T cells (TM).

**Supplementary Table 4. Correlation with cell quality features.** Each tab includes the Pearson correlation of each cGEP’s usage (rows) with different per-cell quality features for each dataset (columns). MitoFrac denotes the % of unique molecular identifiers from MT-genes. RNA\_Detected denotes the number of unique genes detected per cell. RNA\_Count denotes the number of unique molecular identifiers per cell. PCFrac denotes the percentage of unique molecular identifiers that are assigned to a protein coding gene in Gencode version 44.

**Supplementary Table 5. AIM-Seq association.** Regression coefficients and P-values for the association between cGEP usage and binary variables reflecting CEFX vs. mock stimulation or

AIM-positive vs. AIM-negative. Coef. represents the regression coefficient, P represents the P-value, and Q represents the FDR-corrected P-value.

**Supplementary Table 6. Association with proliferation.** T-statistics, P-values, and  $\log_2$  odds ratios for the paired T-test of proliferating and non-proliferating T cells in each dataset (tabs). For the meta-analysis across datasets it provides the Fisher's method combined P-value and the average  $\log_2$  odds ratio.

**Supplementary Table 7. Association with disease.** Ordinary least squares regression coefficients (Beta), P-values (P), FDR-corrected Q-values (Q), and average fold changes (FC) for phenotype associations shown in Figure S7.

**Supplementary Table 8. Association with immune checkpoint inhibitor response.** P-values and effect sizes for associations with ICI in melanoma, non-melanoma skin cancer (NMSC), and colorectal cancer (CRC). Results for pre-treatment (Pre) or post-treatment (Post) samples only are computed as two-tailed T-tests. Results for the combination of Pre and Post samples (Both) is computed from linear regression controlling for timepoint of the sample as a covariate. Meta-analysis P-values are computed using Fisher's Method.

## Supplementary Note References

1. Gene Ontology Consortium *et al.* The Gene Ontology knowledgebase in 2023. *Genetics*

- 224**, (2023).
2. Cano-Gamez, E. *et al.* Single-cell transcriptomics identifies an effectorness gradient shaping the response of CD4<sup>+</sup> T cells to cytokines. *Nat. Commun.* **11**, 1801 (2020).
  3. Arner, E. *et al.* Transcribed enhancers lead waves of coordinated transcription in transitioning mammalian cells. *Science* **347**, 1010–1014 (2015).
  4. Vacca, A. *et al.* Conserved temporal ordering of promoter activation implicates common mechanisms governing the immediate early response across cell types and stimuli. *Open Biol.* **8**, (2018).
  5. Bahrami, S. & Drabløs, F. Gene regulation in the immediate-early response process. *Adv. Biol. Regul.* **62**, 37–49 (2016).
  6. van den Brink, S. C. *et al.* Single-cell sequencing reveals dissociation-induced gene expression in tissue subpopulations. *Nat. Methods* **14**, 935–936 (2017).
  7. Lacar, B. *et al.* Nuclear RNA-seq of single neurons reveals molecular signatures of activation. *Nat. Commun.* **7**, 11022 (2016).
  8. Stephenson, E. *et al.* Single-cell multi-omics analysis of the immune response in COVID-19. *Nat. Med.* **27**, 904–916 (2021).
  9. COvid-19 Multi-omics Blood ATlas (COMBAT) Consortium. Electronic address: julian.knight@well.ox.ac.uk & COvid-19 Multi-omics Blood ATlas (COMBAT) Consortium. A blood atlas of COVID-19 defines hallmarks of disease severity and specificity. *Cell* **185**, 916–938.e58 (2022).
  10. Asashima, H. *et al.* PD-1<sup>high</sup>CXCR5-CD4<sup>+</sup> peripheral helper T cells promote CXCR3<sup>+</sup> plasmablasts in human acute viral infection. *Cell Rep.* **42**, 111895 (2023).
  11. Zhang, F. *et al.* Deconstruction of rheumatoid arthritis synovium defines inflammatory subtypes. *Nature* **623**, 616–624 (2023).

12. Sun, J. *et al.* Metallothionein-1 suppresses rheumatoid arthritis pathogenesis by shifting the Th17/Treg balance. *Eur. J. Immunol.* **48**, 1550–1562 (2018).
13. Rao, D. A. *et al.* Pathologically expanded peripheral T helper cell subset drives B cells in rheumatoid arthritis. *Nature* **542**, 110–114 (2017).
14. Miyazaki, Y. *et al.* Th22 Cells Promote Osteoclast Differentiation via Production of IL-22 in Rheumatoid Arthritis. *Front. Immunol.* **9**, 2901 (2018).
15. Luo, H. *et al.* Pan-cancer single-cell analysis reveals the heterogeneity and plasticity of cancer-associated fibroblasts in the tumor microenvironment. *Nat. Commun.* **13**, 6619 (2022).
16. Yasumizu, Y. *et al.* Single-cell transcriptome landscape of circulating CD4+ T cell populations in autoimmune diseases. *Cell Genomics* 100473 (2024)  
doi:10.1016/j.xgen.2023.100473.
17. Gavish, A. *et al.* Hallmarks of transcriptional intratumour heterogeneity across a thousand tumours. *Nature* **618**, 598–606 (2023).
