# Supplementary material for: Reproducible single-cell annotation of programs underlying T cell subsets, activation states and functions
Source: Springer Nature journal article supplement (doi:10.1038/s41592-025-02793-1), 2025-09-01
Supplement: MOESM2 [file 41592_2025_2793_MOESM2_ESM.pdf]

## Reporting Summary

Nature Portfolio wishes to improve the reproducibility of the work that we publish. This form provides structure for consistency and transparency in reporting. For further information on Nature Portfolio policies, see our [Editorial Policies](#) and the [Editorial Policy Checklist](#).

### Statistics

For all statistical analyses, confirm that the following items are present in the figure legend, table legend, main text, or Methods section.

n/a | Confirmed

- The exact sample size ( $n$ ) for each experimental group/condition, given as a discrete number and unit of measurement
- A statement on whether measurements were taken from distinct samples or whether the same sample was measured repeatedly
- The statistical test(s) used AND whether they are one- or two-sided  
*Only common tests should be described solely by name; describe more complex techniques in the Methods section.*
- A description of all covariates tested
- A description of any assumptions or corrections, such as tests of normality and adjustment for multiple comparisons
- A full description of the statistical parameters including central tendency (e.g. means) or other basic estimates (e.g. regression coefficient) AND variation (e.g. standard deviation) or associated estimates of uncertainty (e.g. confidence intervals)
- For null hypothesis testing, the test statistic (e.g.  $F$ ,  $t$ ,  $r$ ) with confidence intervals, effect sizes, degrees of freedom and  $P$  value noted  
*Give  $P$  values as exact values whenever suitable.*
- For Bayesian analysis, information on the choice of priors and Markov chain Monte Carlo settings
- For hierarchical and complex designs, identification of the appropriate level for tests and full reporting of outcomes
- Estimates of effect sizes (e.g. Cohen's  $d$ , Pearson's  $r$ ), indicating how they were calculated

*Our web collection on [statistics for biologists](#) contains articles on many of the points above.*

### Software and code

Policy information about [availability of computer code](#)

Data collection | BD FACSDiva 9.4 was used for FACS sorting cells prior to sequencing.

Data analysis | The code for star-CellAnnotator (starCAT) is available at <https://github.com/immunogenomics/starCAT>. The analysis scripts used in this paper are available at [https://github.com/immunogenomics/TCAT\\_analysis](https://github.com/immunogenomics/TCAT_analysis).

Softwares used in these analysis scripts include:

```
cNMF          1.5.0
scsim2
anndata       0.10.9
anyio         4.3.0
argon2-cffi   23.1.0
argon2-cffi-bindings 21.2.0
array_api_compat 1.8
arrow         1.3.0
asttokens    2.4.1
async-lru    2.0.4
attrs        23.2.0
Babel        2.14.0
backports.tarfile 1.2.0
beautifulsoup4 4.12.3
bleach       6.1.0
```

|                           |           |
|---------------------------|-----------|
| blinker                   | 1.8.2     |
| Brotli                    | 1.1.0     |
| cached-property           | 1.5.2     |
| certifi                   | 2024.8.30 |
| cffi                      | 1.16.0    |
| charset-normalizer        | 3.3.2     |
| click                     | 8.1.7     |
| cloudpickle               | 3.0.0     |
| cnmf                      | 1.5.4     |
| colorama                  | 0.4.6     |
| colorcet                  | 3.1.0     |
| comm                      | 0.2.2     |
| contourpy                 | 1.2.1     |
| cryptography              | 43.0.0    |
| cycler                    | 0.12.1    |
| dask                      | 2024.5.0  |
| datashader                | 0.16.1    |
| debugpy                   | 1.8.1     |
| decorator                 | 5.1.1     |
| defusedxml                | 0.7.1     |
| Deprecated                | 1.2.14    |
| docutils                  | 0.21.2    |
| entrypoints               | 0.4       |
| et-xmlfile                | 1.1.0     |
| exceptiongroup            | 1.2.2     |
| executing                 | 2.0.1     |
| fastcluster               | 1.2.6     |
| fastjsonschema            | 2.19.1    |
| Flask                     | 3.0.3     |
| fonttools                 | 4.53.1    |
| fqdn                      | 1.5.1     |
| fsspec                    | 2024.3.1  |
| future                    | 1.0.0     |
| get-annotations           | 0.1.2     |
| graphtools                | 1.5.3     |
| gseapy                    | 1.1.3     |
| h11                       | 0.14.0    |
| h2                        | 4.1.0     |
| h5py                      | 3.11.0    |
| harmonypy                 | 0.0.9     |
| hpack                     | 4.0.0     |
| httpcore                  | 1.0.5     |
| httpx                     | 0.27.0    |
| hyperframe                | 6.0.1     |
| idna                      | 3.8       |
| igraph                    | 0.11.5    |
| importlib_metadata        | 7.1.0     |
| importlib_resources       | 6.4.0     |
| ipykernel                 | 6.29.3    |
| ipython                   | 8.22.2    |
| ipython-genutils          | 0.2.0     |
| ipywidgets                | 8.1.2     |
| isoduration               | 20.11.0   |
| itsdangerous              | 2.2.0     |
| jaraco.classes            | 3.4.0     |
| jaraco.context            | 5.3.0     |
| jaraco.functools          | 4.0.1     |
| jedi                      | 0.19.1    |
| jeepney                   | 0.8.0     |
| Jinja2                    | 3.1.4     |
| joblib                    | 1.4.2     |
| json5                     | 0.9.25    |
| jsonpointer               | 2.4       |
| jsonschema                | 4.22.0    |
| jsonschema-specifications | 2023.12.1 |
| jupyter                   | 1.0.0     |
| jupyter_client            | 7.4.9     |
| jupyter-console           | 6.6.3     |
| jupyter_core              | 5.7.2     |
| jupyter-events            | 0.10.0    |
| jupyter-lsp               | 2.2.5     |
| jupyter_server            | 2.14.0    |
| jupyter_server_terminals  | 0.5.3     |
| jupyterlab                | 4.2.0     |
| jupyterlab_pygments       | 0.3.0     |
| jupyterlab_server         | 2.27.1    |

|                      |             |
|----------------------|-------------|
| jupyterlab_widgets   | 3.0.10      |
| keyring              | 25.2.1      |
| kiwisolver           | 1.4.5       |
| legacy-api-wrap      | 1.4         |
| leidenalg            | 0.10.2      |
| llvmlite             | 0.43.0      |
| locket               | 1.0.0       |
| magic-impute         | 3.0.0       |
| markdown-it-py       | 3.0.0       |
| MarkupSafe           | 2.1.5       |
| matplotlib           | 3.8.4       |
| matplotlib-inline    | 0.1.7       |
| mdurl                | 0.1.2       |
| mistune              | 3.0.2       |
| more-itertools       | 10.3.0      |
| mudata               | 0.2.3       |
| multipledispatch     | 0.6.0       |
| munkres              | 1.1.4       |
| muon                 | 0.1.6       |
| natsort              | 8.4.0       |
| nbclassic            | 1.0.0       |
| nbclient             | 0.10.0      |
| nbconvert            | 7.16.4      |
| nbformat             | 5.10.4      |
| nest_asyncio         | 1.6.0       |
| networkx             | 3.3         |
| nh3                  | 0.2.18      |
| notebook             | 6.5.6       |
| notebook_shim        | 0.2.4       |
| numba                | 0.60.0      |
| numpy                | 1.26.4      |
| openpyxl             | 3.1.2       |
| overrides            | 7.7.0       |
| packaging            | 24.1        |
| palettable           | 3.3.3       |
| pandas               | 2.2.2       |
| pandocfilters        | 1.5.0       |
| param                | 2.1.0       |
| parso                | 0.8.4       |
| partd                | 1.4.2       |
| patsy                | 0.5.6       |
| pexpect              | 4.9.0       |
| pickleshare          | 0.7.5       |
| pillow               | 10.4.0      |
| pip                  | 24.0        |
| pkginfo              | 1.10.0      |
| pkgutil_resolve_name | 1.3.10      |
| platformdirs         | 4.2.1       |
| ply                  | 3.11        |
| prometheus_client    | 0.20.0      |
| prompt-toolkit       | 3.0.42      |
| protobuf             | 4.25.3      |
| psutil               | 5.9.8       |
| ptyprocess           | 0.7.0       |
| pure-eval            | 0.2.2       |
| pyparser             | 2.22        |
| pyct                 | 0.5.0       |
| Pygments             | 2.18.0      |
| PyGSP                | 0.5.1       |
| pynndescent          | 0.5.12      |
| yparsing             | 3.1.2       |
| PyQt5                | 5.15.9      |
| PyQt5-sip            | 12.12.2     |
| PySocks              | 1.7.1       |
| python-dateutil      | 2.9.0.post0 |
| python-json-logger   | 2.0.7       |
| pytz                 | 2024.1      |
| PyYAML               | 6.0.2       |
| pyzmq                | 24.0.1      |
| qtconsole            | 5.5.2       |
| QtPy                 | 2.4.1       |
| readme_renderer      | 44.0        |
| referencing          | 0.35.1      |
| requests             | 2.32.3      |
| requests-toolbelt    | 1.0.0       |
| rfc3339-validator    | 0.1.4       |

|                       |                |
|-----------------------|----------------|
| rfc3986               | 2.0.0          |
| rfc3986-validator     | 0.1.1          |
| rich                  | 13.7.1         |
| rpds-py               | 0.18.1         |
| scanpy                | 1.10.1         |
| scikit-learn          | 1.5.1          |
| scikit-misc           | 0.1.4          |
| scipy                 | 1.14.1         |
| scprep                | 1.2.3          |
| seaborn               | 0.13.2         |
| SecretStorage         | 3.3.3          |
| Send2Trash            | 1.8.3          |
| session_info          | 1.0.0          |
| setuptools            | 69.5.1         |
| sip                   | 6.7.12         |
| six                   | 1.16.0         |
| sniffio               | 1.3.1          |
| soupsieve             | 2.5            |
| stack-data            | 0.6.2          |
| starcatpy             | 1.0.8          |
| statsmodels           | 0.14.1         |
| stdlib-list           | 0.10.0         |
| tasklogger            | 1.2.0          |
| terminado             | 0.18.1         |
| texttable             | 1.7.0          |
| threadpoolctl         | 3.5.0          |
| tinycss2              | 1.3.0          |
| toml                  | 0.10.2         |
| tomli                 | 2.0.1          |
| toolz                 | 0.12.1         |
| tornado               | 6.4            |
| tqdm                  | 4.66.5         |
| traitlets             | 5.14.3         |
| twine                 | 5.1.1          |
| types-python-dateutil | 2.9.0.20240316 |
| typing_extensions     | 4.11.0         |
| typing-utils          | 0.1.0          |
| tzdata                | 2024.1         |
| umap-learn            | 0.5.5          |
| unicodedata2          | 15.1.0         |
| uri-template          | 1.3.0          |
| urllib3               | 2.2.2          |
| wcwidth               | 0.2.13         |
| webcolors             | 1.13           |
| webencodings          | 0.5.1          |
| websocket-client      | 1.8.0          |
| Werkzeug              | 3.0.3          |
| wheel                 | 0.43.0         |
| widgetsnbextension    | 4.0.10         |
| wrapt                 | 1.16.0         |
| xarray                | 2024.3.0       |
| xlrd                  | 1.2.0          |
| zipp                  | 3.17.0         |

For manuscripts utilizing custom algorithms or software that are central to the research but not yet described in published literature, software must be made available to editors and reviewers. We strongly encourage code deposition in a community repository (e.g. GitHub). See the Nature Portfolio [guidelines for submitting code & software](#) for further information.

## Data

Policy information about [availability of data](#)

All manuscripts must include a [data availability statement](#). This statement should provide the following information, where applicable:

- Accession codes, unique identifiers, or web links for publicly available datasets
- A description of any restrictions on data availability
- For clinical datasets or third party data, please ensure that the statement adheres to our [policy](#)

The data used in this study for training and validating TCAT is publicly available, and can be downloaded from the following sources: <https://doi.org/10.7303/syn52297840> (AMP-RA), <https://zenodo.org/records/5461803> (Pan-Cancer), GEO: GSE164378 (HIV-Vaccine), <https://www.ebi.ac.uk/biostudies/arrayexpress/studies/E-MTAB-10026> (UK-Covid), <https://zenodo.org/records/6120249> (COMBAT), <https://www.tissueimmunecellatlas.org/> (Pan-Tissue), GEO: GSE158769 (TBRU), GEO: GSE206265 (Flu-Vaccine). The count matrices for the Activation Induced Marker (AIM)-Seq data produced in this study are located on Zenodo (<https://zenodo.org/records/15271929>).

## Human research participants

Policy information about [studies involving human research participants and Sex and Gender in Research](#).

|                             |                                                                                                                                                                                                                                                                                                                                                                                                 |
|-----------------------------|-------------------------------------------------------------------------------------------------------------------------------------------------------------------------------------------------------------------------------------------------------------------------------------------------------------------------------------------------------------------------------------------------|
| Reporting on sex and gender | All five participants were female. No sex-specific analyses were performed.                                                                                                                                                                                                                                                                                                                     |
| Population characteristics  | Participants were healthy adults between the ages 40 and 50. We excluded individuals with autoimmune diseases or on immunomodulatory medications.                                                                                                                                                                                                                                               |
| Recruitment                 | These individuals were recruited from the Partners Biobank. We excluded individuals with autoimmune diseases or on immunomodulatory medications. Recruitment occurred at clinics associated with MGB and may be biased towards more complex cases and individuals representative of the Greater Boston area. Self-selection biases may be present as partaking in Partners Biobank is optional. |
| Ethics oversight            | Mass General Brigham Institutional Review Board (IRB)                                                                                                                                                                                                                                                                                                                                           |

Note that full information on the approval of the study protocol must also be provided in the manuscript.

## Field-specific reporting

Please select the one below that is the best fit for your research. If you are not sure, read the appropriate sections before making your selection.

Life sciences       Behavioural & social sciences       Ecological, evolutionary & environmental sciences

For a reference copy of the document with all sections, see [nature.com/documents/nr-reporting-summary-flat.pdf](https://nature.com/documents/nr-reporting-summary-flat.pdf)

## Life sciences study design

All studies must disclose on these points even when the disclosure is negative.

|                 |                                                                                                                                                                                                                                                                                                                                                                                                                                                                                                                                                                                                                                                                                                                                                                                                                                                                                                                                                                             |
|-----------------|-----------------------------------------------------------------------------------------------------------------------------------------------------------------------------------------------------------------------------------------------------------------------------------------------------------------------------------------------------------------------------------------------------------------------------------------------------------------------------------------------------------------------------------------------------------------------------------------------------------------------------------------------------------------------------------------------------------------------------------------------------------------------------------------------------------------------------------------------------------------------------------------------------------------------------------------------------------------------------|
| Sample size     | Our primary analysis of public data included 1.7 million T cells from 905 samples from 695 individuals. This allowed us to define a comprehensive atlas of T cell states in diseases using some of the largest scRNA-seq datasets publicly available for T cells. As we were highly powered to resolve cell states in this large dataset, we then applied it to annotate cell states in our smaller experimental study, which included 43,222 cells across five samples from three stimulation conditions (stimulated, unstimulated, mock). We did not perform an analysis of number of samples necessary prior to performing the experiment. However, this sample size provided us many thousands of cells per donor, per stimulation condition. We were interested in testing the effects of stimulation condition on cell states. This number of cells and samples allowed us to be powered to detect significant cell state differences between stimulation conditions. |
| Data exclusions | No data was excluded from analyses.                                                                                                                                                                                                                                                                                                                                                                                                                                                                                                                                                                                                                                                                                                                                                                                                                                                                                                                                         |
| Replication     | Data was collected on five participants (five replicates). All replications were successful and included in the data analysis. No further replication of data was performed.                                                                                                                                                                                                                                                                                                                                                                                                                                                                                                                                                                                                                                                                                                                                                                                                |
| Randomization   | All cells from all samples were randomly sorted into two groups corresponding to peptide treated and mock-stimulated cells.                                                                                                                                                                                                                                                                                                                                                                                                                                                                                                                                                                                                                                                                                                                                                                                                                                                 |
| Blinding        | Blinding was not relevant to the study as all samples were assigned to both peptide treated and mock-stimulated conditions. Data analysis was unbiased and tested differences between antigen-stimulation statuses.                                                                                                                                                                                                                                                                                                                                                                                                                                                                                                                                                                                                                                                                                                                                                         |

## Reporting for specific materials, systems and methods

We require information from authors about some types of materials, experimental systems and methods used in many studies. Here, indicate whether each material, system or method listed is relevant to your study. If you are not sure if a list item applies to your research, read the appropriate section before selecting a response.

### Materials & experimental systems

| n/a                                 | Involved in the study                                  |
|-------------------------------------|--------------------------------------------------------|
| <input type="checkbox"/>            | <input checked="" type="checkbox"/> Antibodies         |
| <input checked="" type="checkbox"/> | <input type="checkbox"/> Eukaryotic cell lines         |
| <input checked="" type="checkbox"/> | <input type="checkbox"/> Palaeontology and archaeology |
| <input checked="" type="checkbox"/> | <input type="checkbox"/> Animals and other organisms   |
| <input checked="" type="checkbox"/> | <input type="checkbox"/> Clinical data                 |
| <input checked="" type="checkbox"/> | <input type="checkbox"/> Dual use research of concern  |

### Methods

| n/a                                 | Involved in the study                              |
|-------------------------------------|----------------------------------------------------|
| <input checked="" type="checkbox"/> | <input type="checkbox"/> ChIP-seq                  |
| <input type="checkbox"/>            | <input checked="" type="checkbox"/> Flow cytometry |
| <input checked="" type="checkbox"/> | <input type="checkbox"/> MRI-based neuroimaging    |

## Antibodies

### Antibodies used

#### Co-stimulation:

Anti-CD28 antibody, Biolegend, Catalog #: 302933 RRID: AB\_11150591  
Anti-CD49d antibody, Biolegend, Catalog #: 304339 RRID: AB\_281044

#### Proteogenomics:

TotalSeq™-C Human Universal Cocktail, V1.0, Biolegend, Catalog #: 399905  
Human TOTAL-SeqC Repertoire (5') Hashing Antibodies, BioLegend, Catalog #: 394661, 394663, 394665

#### Flow Cytometry:

Anti-CD3-BV421 (SK7), Biolegend, Catalog #: 344833 RRID: AB\_2565674  
Anti-CD134-PE (Ber-ACT35), Biolegend, Catalog #: 350003 RRID: AB\_10641708  
Anti-CD274-BV785 (29E.2A3), Biolegend, Catalog #: 329735 RRID: AB\_2629581  
Anti-CD137-APC (4-B4-1), Biolegend, Catalog #: 309809 RRID: AB\_830671  
Anti-CD4-FITC (RPA-T4), Biolegend, Catalog #: 300505 RRID: AB\_314073

### Validation

All antibodies used are publicly available through Biolegend. Biolegend provides the following statements on its website:

#### Antibodies used for co-stimulation:

Each lot of this antibody is quality control tested by immunofluorescent staining with flow cytometric analysis. FC - Quality tested  
IHC-F, Costim - Reported in the literature, not verified in house

#### Antibodies used for proteogenomics:

##### TotalSeq™ Antibodies

Bulk lots are tested by PCR and sequencing to confirm the oligonucleotide barcodes. They are also tested by flow cytometry to ensure the antibodies recognize the proper cell populations.

Bottled lots are tested by PCR and sequencing to confirm the oligonucleotide barcodes.

#### Antibodies used for flow cytometry:

Each lot of this antibody is quality control tested by immunofluorescent staining with flow cytometric analysis. FC - Quality tested

## Flow Cytometry

### Plots

Confirm that:

- The axis labels state the marker and fluorochrome used (e.g. CD4-FITC).
- The axis scales are clearly visible. Include numbers along axes only for bottom left plot of group (a 'group' is an analysis of identical markers).
- All plots are contour plots with outliers or pseudocolor plots.
- A numerical value for number of cells or percentage (with statistics) is provided.

### Methodology

#### Sample preparation

PBMCs from 5 healthy donors were quickly thawed and placed in pre-warmed xVIVO15 cell culture medium (Lonza) supplemented with 5% heat-inactivated FBS. To reduce cell clumping, PBMCs were incubated in xVIVO15 containing 50 U/mL of benzonase nuclease (Sigma-Aldrich) for 15 minutes at 37 degrees and filtered using a 70 µm cell strainer. Washed and nuclease treated cells were seeded in a 96 well cell culture plate at a concentration of 2.5 x 10<sup>6</sup>/mL. Peptide stimulations were performed using the CEFX Ultra SuperStim Pool (JPT Peptide Technologies, Product Code: PM-CEFX-1) at a final concentration of 1.25 µg/mL per peptide for 22 hours at 37 degrees and 5% CO<sub>2</sub>. Recombinant anti-CD28 and anti-CD49d antibodies (BioLegend) were added at a final concentration of 5 µg/mL and 0.625 µg/mL, respectively, to provide co-stimulation for peptide reactive T-cells. Separately mock-stimulated cells were treated with anti-CD28 and anti-CD49d antibodies at the same concentration. Peptide responsive T-cells were detected by the expression of the surface activation markers PD-L1, OX40, and CD137 via flow cytometry. Following the stimulation, peptide treated and mock-stimulated cells were washed in cell staining buffer (PBS + 2mM EDTA + 2% FBS) to end the stimulation. Fc receptor blocking was performed using a 1:50 dilution of Human TruStain FcX (Biolegend) in cell staining buffer for 10 minutes at 4 degrees. Cell viability staining was performed using a 1:500 dilution of Zombie Yellow Fixable Viability Dye (BioLegend) prepared in PBS for 30 minutes at 4 degrees. Surface staining was performed using 1:100 dilutions of BV421 conjugated anti-CD3, FITC conjugated anti-CD4, BV786 conjugated anti-PD-L1, PE conjugated anti-OX40, and APC conjugated anti-CD137 (BioLegend) for 25 minutes at 4 degrees in cell staining buffer. Following cell staining, antigen reactive and non-reactive T-cells were identified using a BD FACSAria II cell sorter and collected in cRPMI medium (100 U/mL penicillin-streptomycin + 2 mM L-glutamine + 10 mM HEPES + 0.1 mM non-essential amino acids + 1 mM sodium pyruvate + .05 mM 2-Mercaptoethanol) supplemented with 20% FBS.

#### Instrument

BD FACSAria II

#### Software

BD FACSDiva 9.4

Cell population abundance

CD4+ and CD3+CD4- cell populations were 58% and 25% of total live gated PBMCs in the peptide stimulated condition. Within peptide-stimulated CD4 T cells, 4.21% were AIM-positive and 81.7% were AIM-negative. Within peptide-stimulated CD8 T cells, 2.45% were AIM-positive and 74.9% were AIM-negative.

Gating strategy

Gating on CD3+CD4+ PBMCs isolated CD4 T cells. Gating on CD3+CD4- PBMCs isolated CD8 T cells. Gating on PDL1+OX40+ CD4 T cells was then performed to sort Antigen Induced Marker (AIM)-positive from AIM-negative cells. Gating on PDL1+CD137+ CD8 T cells was performed to sort AIM-positive and AIM-negative cells.

Tick this box to confirm that a figure exemplifying the gating strategy is provided in the Supplementary Information.
