# Supplementary material for: Reproducible single-cell annotation of programs underlying T cell subsets, activation states and functions
Source: Nat Methods. 2025 Sep 3;22(9):1964–80. doi: 10.1038/s41592-025-02793-1 (PMC12446064; doi:10.1038/s41592-025-02793-1)
Supplement: Supplementary file 4 — P values corresponding to Supplementary Fig. 7e. [file 41592_2025_2793_MOESM4_ESM.xlsx]

## Sheet: SuppFigure7
	T	P	logRatio	dataset	normalization	signed_log_P	logP	GEP
0	16.3793	4.47051e-19	5.51463	AMP-RA	Normed	18.3496	18.3496	CellCycle-G2M
1	-10.6187	4.54908e-13	-4.83391	AMP-RA	Normed	-12.3421	12.3421	Translation
2	11.9046	1.4714e-14	1.39619	AMP-RA	Normed	13.8323	13.8323	HLA
3	-6.07611	4.05981e-07	-0.662985	AMP-RA	Normed	-6.39149	6.39149	ISG
4	-11.7738	2.06554e-14	-1.37645	AMP-RA	Normed	-13.685	13.685	Mito
5	-6.54803	8.99597e-08	-0.408656	AMP-RA	Normed	-7.04595	7.04595	Doublet-RBC
6	-12.251	6.05221e-15	-0.929442	AMP-RA	Normed	-14.2181	14.2181	gdT
7	37.9944	1.99564e-32	4.94958	AMP-RA	Normed	31.6999	31.6999	CellCycle-S
8	-3.81849	0.00046927	-0.864137	AMP-RA	Normed	-3.32858	3.32858	Cytotoxic
9	1.43256	0.15995	0.0620155	AMP-RA	Normed	0.796017	0.796017	Doublet-Platelet
10	7.21166	1.09952e-08	1.71206	AMP-RA	Normed	7.9588	7.9588	NME1/FABP5
11	-2.49404	0.0169773	-0.539085	AMP-RA	Normed	-1.77013	1.77013	Th22
12	-11.0225	1.51358e-13	-1.6907	AMP-RA	Normed	-12.82	12.82	MAIT
13	21.6006	2.64187e-23	5.87732	AMP-RA	Normed	22.5781	22.5781	CellCycle-Late-S
14	4.00001	0.000273849	0.449789	AMP-RA	Normed	3.56249	3.56249	Cytoskeleton
15	-4.84532	2.038e-05	-0.869811	AMP-RA	Normed	-4.6908	4.6908	Heatshock
16	0.730197	0.469634	-0.123975	AMP-RA	Normed	0.328241	0.328241	Multi-Cytokine
17	0.784548	0.437459	-0.0437084	AMP-RA	Normed	0.359063	0.359063	TEMRA
18	-7.33614	7.43772e-09	-1.49065	AMP-RA	Normed	-8.12856	8.12856	Doublet-Myeloid
19	4.13545	0.000182263	0.440371	AMP-RA	Normed	3.7393	3.7393	Metallothionein
20	-13.7992	1.36603e-16	-1.72131	AMP-RA	Normed	-15.8645	15.8645	CD4-CM
21	-10.9831	1.68351e-13	-2.25447	AMP-RA	Normed	-12.7738	12.7738	IEG
22	-5.63862	1.64472e-06	-0.804499	AMP-RA	Normed	-5.78391	5.78391	CD8-EM
23	-10.8177	2.6379e-13	-2.38567	AMP-RA	Normed	-12.5787	12.5787	IEG2
24	-9.14493	3.02045e-11	-3.6476	AMP-RA	Normed	-10.5199	10.5199	CD4-Naive
25	-5.47835	2.74332e-06	-0.994109	AMP-RA	Normed	-5.56172	5.56172	Treg
26	-12.6284	2.33885e-15	-2.16082	AMP-RA	Normed	-14.631	14.631	Th17-Resting
27	-2.72125	0.00966802	-0.199018	AMP-RA	Normed	-2.01466	2.01466	Poor-Quality
28	-11.3342	6.56671e-14	-1.79975	AMP-RA	Normed	-13.1827	13.1827	CD8-Naive
29	-2.13803	0.0388368	-0.497353	AMP-RA	Normed	-1.41076	1.41076	RGCC/MYADM
30	4.93367	1.54368e-05	0.463583	AMP-RA	Normed	4.81144	4.81144	TIMD4/TIM3
31	-7.20494	1.123e-08	-0.828822	AMP-RA	Normed	-7.94962	7.94962	Doublet-Plasmablast
32	-10.0058	2.51743e-12	-1.7763	AMP-RA	Normed	-11.599	11.599	BCL2/FAM13A
33	2.66999	0.0110021	0.271706	AMP-RA	Normed	1.95852	1.95852	IL10/IL19
34	-8.31103	3.65832e-10	-0.638232	AMP-RA	Normed	-9.43672	9.43672	Th2-Activated
35	-14.7416	1.55687e-17	-1.96267	AMP-RA	Normed	-16.8077	16.8077	Th2-Resting
36	0.707247	0.483618	-0.0159596	AMP-RA	Normed	0.315497	0.315497	ICOS/CD38
37	1.39259	0.171633	-0.0665054	AMP-RA	Normed	0.7654	0.7654	Doublet-Bcell
38	-12.7524	1.71792e-15	-1.96863	AMP-RA	Normed	-14.765	14.765	Th1-Like
39	0.372759	0.711346	-0.0375232	AMP-RA	Normed	0.147919	0.147919	CTLA4/CD38
40	-3.11481	0.00344401	-0.381623	AMP-RA	Normed	-2.46294	2.46294	CD8-Trm
41	2.74145	0.00918478	0.295047	AMP-RA	Normed	2.03693	2.03693	Th17-Activated
42	-4.28831	0.000114566	-0.650967	AMP-RA	Normed	-3.94095	3.94095	Tfh-2
43	4.90277	1.70136e-05	0.760771	AMP-RA	Normed	4.7692	4.7692	OX40/EBI3
44	-13.4678	3.0025e-16	-2.7462	AMP-RA	Normed	-15.5225	15.5225	CD172a/MERTK
45	-9.10573	3.38979e-11	-2.71785	AMP-RA	Normed	-10.4698	10.4698	IEG3
46	-7.11686	1.48198e-08	-1.20357	AMP-RA	Normed	-7.82916	7.82916	Doublet-Fibroblast
47	-3.71861	0.000628765	-0.39739	AMP-RA	Normed	-3.20151	3.20151	SOX4/TOX2
48	-10.3834	8.72376e-13	-2.85288	AMP-RA	Normed	-12.0593	12.0593	CD40LG/TXNIP
49	4.3257	0.000102193	0.474133	AMP-RA	Normed	3.99058	3.99058	Tph
50	6.6007	7.60697e-08	0.742783	AMP-RA	Normed	7.11879	7.11879	Exhaustion
51	-4.09204	0.000207763	-0.673573	AMP-RA	Normed	-3.68243	3.68243	Tfh-1
52	42.1517	8.81879e-74	6.19802	COMBAT	Normed	73.0546	73.0546	CellCycle-G2M
53	-18.769	1.67155e-37	-4.50207	COMBAT	Normed	-36.7769	36.7769	Translation
54	15.7675	5.03374e-31	1.66689	COMBAT	Normed	30.2981	30.2981	HLA
55	-4.18524	5.4557e-05	-0.227418	COMBAT	Normed	-4.26315	4.26315	ISG
56	0.119244	0.905282	-0.023006	COMBAT	Normed	0.0432163	0.0432163	Mito
57	0.486472	0.62752	-0.166282	COMBAT	Normed	0.202373	0.202373	Doublet-RBC
58	-6.44567	2.50946e-09	-0.526523	COMBAT	Normed	-8.60042	8.60042	gdT
59	109.281	5.35249e-122	6.18457	COMBAT	Normed	121.271	121.271	CellCycle-S
60	-6.17586	9.28697e-09	-0.60923	COMBAT	Normed	-8.03213	8.03213	Cytotoxic
61	0.457641	0.648038	-0.144111	COMBAT	Normed	0.188399	0.188399	Doublet-Platelet
62	29.9553	1.55479e-57	3.81683	COMBAT	Normed	56.8083	56.8083	NME1/FABP5
63	-5.17607	9.2228e-07	-0.487523	COMBAT	Normed	-6.03514	6.03514	Th22
64	-13.1106	6.48586e-25	-1.48176	COMBAT	Normed	-24.188	24.188	MAIT
65	49.381	1.39184e-81	6.1554	COMBAT	Normed	80.8564	80.8564	CellCycle-Late-S
66	21.4124	8.39805e-43	1.61592	COMBAT	Normed	42.0758	42.0758	Cytoskeleton
67	8.0425	7.05227e-13	0.519962	COMBAT	Normed	12.1517	12.1517	Heatshock
68	-4.29972	3.50168e-05	-0.312867	COMBAT	Normed	-4.45572	4.45572	Multi-Cytokine
69	1.52556	0.129752	0.07093	COMBAT	Normed	0.886887	0.886887	TEMRA
70	-10.9987	6.92836e-20	-1.76969	COMBAT	Normed	-19.1594	19.1594	Doublet-Myeloid
71	16.8126	2.46077e-33	1.43579	COMBAT	Normed	32.6089	32.6089	Metallothionein
72	-7.40134	2.02901e-11	-0.515255	COMBAT	Normed	-10.6927	10.6927	CD4-CM
73	-11.9319	4.04723e-22	-3.14926	COMBAT	Normed	-21.3928	21.3928	IEG
74	-8.17322	3.52061e-13	-0.725051	COMBAT	Normed	-12.4534	12.4534	CD8-EM
75	-12.2863	5.79243e-23	-1.93601	COMBAT	Normed	-22.2371	22.2371	IEG2
76	-26.7956	1.78058e-52	-3.73499	COMBAT	Normed	-51.7494	51.7494	CD4-Naive
77	-1.23864	0.217895	-0.332542	COMBAT	Normed	-0.661752	0.661752	Treg
78	-19.8231	1.1597e-39	-2.13303	COMBAT	Normed	-38.9357	38.9357	Th17-Resting
79	5.09786	1.29688e-06	0.231781	COMBAT	Normed	5.8871	5.8871	Poor-Quality
80	-22.6858	3.20035e-45	-2.25874	COMBAT	Normed	-44.4948	44.4948	CD8-Naive
81	2.02181	0.0454204	0.149403	COMBAT	Normed	1.34275	1.34275	RGCC/MYADM
82	19.9674	5.9375e-40	2.70521	COMBAT	Normed	39.2264	39.2264	TIMD4/TIM3
83	-21.6438	3.00725e-43	-1.02273	COMBAT	Normed	-42.5218	42.5218	Doublet-Plasmablast
84	-20.1366	2.71693e-40	-2.79494	COMBAT	Normed	-39.5659	39.5659	BCL2/FAM13A
85	14.1574	2.33327e-27	1.44366	COMBAT	Normed	26.632	26.632	IL10/IL19
86	4.81244	4.38343e-06	0.258412	COMBAT	Normed	5.35819	5.35819	Th2-Activated
87	-22.6653	3.49527e-45	-2.04667	COMBAT	Normed	-44.4565	44.4565	Th2-Resting
88	26.4152	7.7376e-52	2.0649	COMBAT	Normed	51.1114	51.1114	ICOS/CD38
89	-17.6802	3.28758e-35	-0.960851	COMBAT	Normed	-34.4831	34.4831	Doublet-Bcell
90	-23.7243	3.92847e-47	-1.86125	COMBAT	Normed	-46.4058	46.4058	Th1-Like
91	16.1757	6.20279e-32	2.20834	COMBAT	Normed	31.2074	31.2074	CTLA4/CD38
92	0.11531	0.908392	-0.0295377	COMBAT	Normed	0.0417268	0.0417268	CD8-Trm
93	8.98088	4.54902e-15	1.83208	COMBAT	Normed	14.3421	14.3421	Th17-Activated
94	2.83262	0.00541683	0.144064	COMBAT	Normed	2.26625	2.26625	Tfh-2
95	25.3078	6.07474e-50	1.50003	COMBAT	Normed	49.2165	49.2165	OX40/EBI3
96	-28.9034	6.75517e-56	-3.99734	COMBAT	Normed	-55.1704	55.1704	CD172a/MERTK
97	-14.6144	2.06582e-28	-1.44414	COMBAT	Normed	-27.6849	27.6849	IEG3
98	-16.4589	1.46821e-32	-1.09438	COMBAT	Normed	-31.8332	31.8332	Doublet-Fibroblast
99	-4.80958	4.43628e-06	-0.196513	COMBAT	Normed	-5.35298	5.35298	SOX4/TOX2
100	-27.3314	2.30581e-53	-3.33157	COMBAT	Normed	-52.6372	52.6372	CD40LG/TXNIP
101	15.0653	1.9306e-29	1.10648	COMBAT	Normed	28.7143	28.7143	Tph
102	23.7323	3.80059e-47	1.87075	COMBAT	Normed	46.4201	46.4201	Exhaustion
103	4.11728	7.0721e-05	0.152716	COMBAT	Normed	4.15045	4.15045	Tfh-1
104	6.36783	8.16244e-05	5.81355	HIV-Vaccine	Normed	4.08818	4.08818	CellCycle-G2M
105	-10.6205	9.13e-07	-5.45363	HIV-Vaccine	Normed	-6.03953	6.03953	Translation
106	1.48501	0.168366	0.191589	HIV-Vaccine	Normed	0.773746	0.773746	HLA
107	-1.30564	0.220913	-0.332641	HIV-Vaccine	Normed	-0.655778	0.655778	ISG
108	-6.91046	4.14132e-05	-1.62381	HIV-Vaccine	Normed	-4.38286	4.38286	Mito
109	-4.38045	0.00137643	-0.929584	HIV-Vaccine	Normed	-2.86125	2.86125	Doublet-RBC
110	-2.73476	0.021021	-1.35293	HIV-Vaccine	Normed	-1.67735	1.67735	gdT
111	13.7733	7.91446e-08	5.335	HIV-Vaccine	Normed	7.10158	7.10158	CellCycle-S
112	0.0433027	0.966313	-0.754367	HIV-Vaccine	Normed	0.0148823	0.0148823	Cytotoxic
113	-4.03704	0.00237251	-1.32654	HIV-Vaccine	Normed	-2.62479	2.62479	Doublet-Platelet
114	3.13801	0.0105458	0.753724	HIV-Vaccine	Normed	1.97692	1.97692	NME1/FABP5
115	-2.4521	0.034135	-0.825997	HIV-Vaccine	Normed	-1.4668	1.4668	Th22
116	-4.47311	0.00119167	-2.5343	HIV-Vaccine	Normed	-2.92385	2.92385	MAIT
117	9.34596	2.94416e-06	5.43499	HIV-Vaccine	Normed	5.53104	5.53104	CellCycle-Late-S
118	2.3293	0.0421002	0.471164	HIV-Vaccine	Normed	1.37572	1.37572	Cytoskeleton
119	-2.83824	0.0176015	-0.559913	HIV-Vaccine	Normed	-1.75445	1.75445	Heatshock
120	-1.42853	0.18362	-0.567341	HIV-Vaccine	Normed	-0.73608	0.73608	Multi-Cytokine
121	0.817106	0.432904	-0.674722	HIV-Vaccine	Normed	0.363609	0.363609	TEMRA
122	-3.04636	0.0123281	-2.53306	HIV-Vaccine	Normed	-1.9091	1.9091	Doublet-Myeloid
123	3.4055	0.00670878	1.12543	HIV-Vaccine	Normed	2.17336	2.17336	Metallothionein
124	-3.79408	0.00351975	-1.61304	HIV-Vaccine	Normed	-2.45349	2.45349	CD4-CM
125	-9.62321	2.25768e-06	-3.73108	HIV-Vaccine	Normed	-5.64634	5.64634	IEG
126	-7.09013	3.33446e-05	-1.60536	HIV-Vaccine	Normed	-4.47697	4.47697	CD8-EM
127	-3.71694	0.00399536	-3.53039	HIV-Vaccine	Normed	-2.39844	2.39844	IEG2
128	-25.1078	2.29979e-10	-4.89451	HIV-Vaccine	Normed	-9.63831	9.63831	CD4-Naive
129	-1.21642	0.251756	-1.2336	HIV-Vaccine	Normed	-0.599019	0.599019	Treg
130	-6.57821	6.24694e-05	-3.32041	HIV-Vaccine	Normed	-4.20433	4.20433	Th17-Resting
131	-5.25794	0.000369151	-1.45093	HIV-Vaccine	Normed	-3.4328	3.4328	Poor-Quality
132	-16.2078	1.6576e-08	-3.78384	HIV-Vaccine	Normed	-7.78052	7.78052	CD8-Naive
133	-4.52249	0.0011041	-1.36027	HIV-Vaccine	Normed	-2.95699	2.95699	RGCC/MYADM
134	3.90716	0.00292674	1.80622	HIV-Vaccine	Normed	2.53362	2.53362	TIMD4/TIM3
135	-13.6196	8.8087e-08	-2.1232	HIV-Vaccine	Normed	-7.05509	7.05509	Doublet-Plasmablast
136	-9.34847	2.93701e-06	-3.19457	HIV-Vaccine	Normed	-5.53209	5.53209	BCL2/FAM13A
137	0.92526	0.376619	-0.0317072	HIV-Vaccine	Normed	0.424097	0.424097	IL10/IL19
138	-1.32111	0.215894	-0.720282	HIV-Vaccine	Normed	-0.665759	0.665759	Th2-Activated
139	-21.9738	8.53561e-10	-2.86147	HIV-Vaccine	Normed	-9.06877	9.06877	Th2-Resting
140	2.65433	0.024133	0.848455	HIV-Vaccine	Normed	1.61739	1.61739	ICOS/CD38
141	-8.90883	4.53432e-06	-1.48784	HIV-Vaccine	Normed	-5.34349	5.34349	Doublet-Bcell
142	-8.94859	4.35664e-06	-2.27494	HIV-Vaccine	Normed	-5.36085	5.36085	Th1-Like
143	2.10807	0.0612407	0.435086	HIV-Vaccine	Normed	1.21296	1.21296	CTLA4/CD38
144	-2.02679	0.07018	-0.879599	HIV-Vaccine	Normed	-1.15379	1.15379	CD8-Trm
145	0.763639	0.462719	0.0375429	HIV-Vaccine	Normed	0.334683	0.334683	Th17-Activated
146	-2.3962	0.0375588	-0.800241	HIV-Vaccine	Normed	-1.42529	1.42529	Tfh-2
147	3.08906	0.0114623	0.396565	HIV-Vaccine	Normed	1.94073	1.94073	OX40/EBI3
148	-8.55107	6.53954e-06	-4.46144	HIV-Vaccine	Normed	-5.18445	5.18445	CD172a/MERTK
149	-8.83657	4.8778e-06	-2.82648	HIV-Vaccine	Normed	-5.31178	5.31178	IEG3
150	-4.20776	0.00180632	-1.52097	HIV-Vaccine	Normed	-2.74321	2.74321	Doublet-Fibroblast
151	-10.5838	9.42694e-07	-1.6661	HIV-Vaccine	Normed	-6.02563	6.02563	SOX4/TOX2
152	-11.9729	2.98428e-07	-3.44815	HIV-Vaccine	Normed	-6.52516	6.52516	CD40LG/TXNIP
153	2.88714	0.0161863	0.410346	HIV-Vaccine	Normed	1.79085	1.79085	Tph
154	5.47275	0.000272002	1.13379	HIV-Vaccine	Normed	3.56543	3.56543	Exhaustion
155	-0.05752	0.955264	-0.558068	HIV-Vaccine	Normed	-0.0198766	0.0198766	Tfh-1
156	22.6819	1.42788e-35	5.38777	Pan-Cancer	Normed	34.8453	34.8453	CellCycle-G2M
157	-9.41579	2.1416e-14	-2.34428	Pan-Cancer	Normed	-13.6693	13.6693	Translation
158	11.0371	1.88326e-17	0.904359	Pan-Cancer	Normed	16.7251	16.7251	HLA
159	-1.55203	0.124809	-0.222716	Pan-Cancer	Normed	-0.903755	0.903755	ISG
160	-10.23	6.10357e-16	-1.25571	Pan-Cancer	Normed	-15.2144	15.2144	Mito
161	-0.967251	0.336486	-0.0036828	Pan-Cancer	Normed	-0.473032	0.473032	Doublet-RBC
162	-12.7345	1.55016e-20	-0.92409	Pan-Cancer	Normed	-19.8096	19.8096	gdT
163	48.0913	1.16744e-58	5.03715	Pan-Cancer	Normed	57.9328	57.9328	CellCycle-S
164	-6.62979	4.33807e-09	-1.12876	Pan-Cancer	Normed	-8.3627	8.3627	Cytotoxic
165	3.9239	0.000189757	0.605136	Pan-Cancer	Normed	3.7218	3.7218	Doublet-Platelet
166	13.6405	4.01451e-22	2.26816	Pan-Cancer	Normed	21.3964	21.3964	NME1/FABP5
167	-2.37137	0.0202557	-0.394919	Pan-Cancer	Normed	-1.69345	1.69345	Th22
168	-9.12938	7.54887e-14	-1.49238	Pan-Cancer	Normed	-13.1221	13.1221	MAIT
169	40.8952	1.65927e-53	5.8869	Pan-Cancer	Normed	52.7801	52.7801	CellCycle-Late-S
170	11.4995	2.63702e-18	1.16285	Pan-Cancer	Normed	17.5789	17.5789	Cytoskeleton
171	-3.72575	0.000372163	-0.633938	Pan-Cancer	Normed	-3.42927	3.42927	Heatshock
172	0.89586	0.373157	0.0277465	Pan-Cancer	Normed	0.428109	0.428109	Multi-Cytokine
173	-1.34965	0.181135	-0.363348	Pan-Cancer	Normed	-0.741997	0.741997	TEMRA
174	-2.52687	0.0135869	-0.903422	Pan-Cancer	Normed	-1.86688	1.86688	Doublet-Myeloid
175	2.30009	0.0241888	0.39064	Pan-Cancer	Normed	1.61639	1.61639	Metallothionein
176	-6.70486	3.14233e-09	-0.559842	Pan-Cancer	Normed	-8.50275	8.50275	CD4-CM
177	-9.08342	9.24297e-14	-1.23365	Pan-Cancer	Normed	-13.0342	13.0342	IEG
178	-13.0904	3.64714e-21	-1.23993	Pan-Cancer	Normed	-20.438	20.438	CD8-EM
179	-13.0146	4.95624e-21	-1.85481	Pan-Cancer	Normed	-20.3048	20.3048	IEG2
180	-8.4931	1.24986e-12	-1.81338	Pan-Cancer	Normed	-11.9031	11.9031	CD4-Naive
181	-6.54068	6.35423e-09	-0.667086	Pan-Cancer	Normed	-8.19694	8.19694	Treg
182	-13.4357	9.0887e-22	-1.40082	Pan-Cancer	Normed	-21.0415	21.0415	Th17-Resting
183	-2.56315	0.0123487	-0.176838	Pan-Cancer	Normed	-1.90838	1.90838	Poor-Quality
184	-5.97215	7.02449e-08	-0.521823	Pan-Cancer	Normed	-7.15339	7.15339	CD8-Naive
185	-6.42728	1.03092e-08	-0.735442	Pan-Cancer	Normed	-7.98677	7.98677	RGCC/MYADM
186	6.0525	5.02088e-08	0.372027	Pan-Cancer	Normed	7.29922	7.29922	TIMD4/TIM3
187	-4.09346	0.000104986	-0.258462	Pan-Cancer	Normed	-3.97887	3.97887	Doublet-Plasmablast
188	-10.0254	1.48638e-15	-0.711963	Pan-Cancer	Normed	-14.8279	14.8279	BCL2/FAM13A
189	6.14338	3.42868e-08	0.674963	Pan-Cancer	Normed	7.46487	7.46487	IL10/IL19
190	-0.643812	0.521635	-0.0526232	Pan-Cancer	Normed	-0.282633	0.282633	Th2-Activated
191	-13.9088	1.38793e-22	-0.987384	Pan-Cancer	Normed	-21.8576	21.8576	Th2-Resting
192	7.44901	1.23993e-10	0.575579	Pan-Cancer	Normed	9.9066	9.9066	ICOS/CD38
193	-0.611838	0.542471	-0.0915527	Pan-Cancer	Normed	-0.265623	0.265623	Doublet-Bcell
194	-17.0506	1.08432e-27	-1.53282	Pan-Cancer	Normed	-26.9648	26.9648	Th1-Like
195	2.11249	0.0379289	0.17219	Pan-Cancer	Normed	1.42103	1.42103	CTLA4/CD38
196	-6.30546	1.72962e-08	-0.587247	Pan-Cancer	Normed	-7.76205	7.76205	CD8-Trm
197	4.8741	5.84063e-06	0.399332	Pan-Cancer	Normed	5.23354	5.23354	Th17-Activated
198	-0.0523357	0.958399	0.0465226	Pan-Cancer	Normed	-0.0184539	0.0184539	Tfh-2
199	6.53823	6.42105e-09	0.771727	Pan-Cancer	Normed	8.19239	8.19239	OX40/EBI3
200	-8.21459	4.27316e-12	-1.46379	Pan-Cancer	Normed	-11.3693	11.3693	CD172a/MERTK
201	-13.4781	7.67151e-22	-1.46591	Pan-Cancer	Normed	-21.1151	21.1151	IEG3
202	-1.46737	0.1464	-0.440976	Pan-Cancer	Normed	-0.834458	0.834458	Doublet-Fibroblast
203	3.75537	0.00033695	0.292753	Pan-Cancer	Normed	3.47243	3.47243	SOX4/TOX2
204	-14.5049	1.35377e-23	-2.00875	Pan-Cancer	Normed	-22.8685	22.8685	CD40LG/TXNIP
205	0.349826	0.727437	0.0257649	Pan-Cancer	Normed	0.138205	0.138205	Tph
206	7.02271	7.95709e-10	0.438986	Pan-Cancer	Normed	9.09925	9.09925	Exhaustion
207	-0.908537	0.366467	-0.0615035	Pan-Cancer	Normed	-0.435965	0.435965	Tfh-1
208	7.40101	5.21931e-07	5.10602	Pan-Tissue	Normed	6.28239	6.28239	CellCycle-G2M
209	-3.87211	0.00102613	-4.77531	Pan-Tissue	Normed	-2.9888	2.9888	Translation
210	3.69579	0.00153441	0.789034	Pan-Tissue	Normed	2.81406	2.81406	HLA
211	-1.00775	0.326238	-0.435748	Pan-Tissue	Normed	-0.486466	0.486466	ISG
212	-0.999295	0.330209	-0.814897	Pan-Tissue	Normed	-0.481211	0.481211	Mito
213	-2.7098	0.0138922	-0.543695	Pan-Tissue	Normed	-1.85723	1.85723	Doublet-RBC
214	-0.210666	0.835391	-0.109896	Pan-Tissue	Normed	-0.0781104	0.0781104	gdT
215	18.6681	1.11044e-13	5.17858	Pan-Tissue	Normed	12.9545	12.9545	CellCycle-S
216	-0.323369	0.749948	0.166418	Pan-Tissue	Normed	-0.124969	0.124969	Cytotoxic
217	1.1906	0.248473	0.0751649	Pan-Tissue	Normed	0.604722	0.604722	Doublet-Platelet
218	3.2601	0.00411917	1.74097	Pan-Tissue	Normed	2.38519	2.38519	NME1/FABP5
219	-2.39054	0.0273375	-0.68672	Pan-Tissue	Normed	-1.56324	1.56324	Th22
220	-3.47771	0.00251957	-1.85318	Pan-Tissue	Normed	-2.59867	2.59867	MAIT
221	9.28807	1.7059e-08	5.57122	Pan-Tissue	Normed	7.76805	7.76805	CellCycle-Late-S
222	4.69375	0.000158137	0.993497	Pan-Tissue	Normed	3.80097	3.80097	Cytoskeleton
223	-2.9367	0.00846652	-2.83937	Pan-Tissue	Normed	-2.0723	2.0723	Heatshock
224	-3.0316	0.00686377	-0.51072	Pan-Tissue	Normed	-2.16344	2.16344	Multi-Cytokine
225	1.99901	0.0601176	0.578286	Pan-Tissue	Normed	1.221	1.221	TEMRA
226	-5.96977	9.57492e-06	-1.51706	Pan-Tissue	Normed	-5.01886	5.01886	Doublet-Myeloid
227	-1.29422	0.2111	-0.453437	Pan-Tissue	Normed	-0.675511	0.675511	Metallothionein
228	-6.40017	3.87944e-06	-1.38114	Pan-Tissue	Normed	-5.41123	5.41123	CD4-CM
229	-5.14957	5.69862e-05	-2.96736	Pan-Tissue	Normed	-4.24423	4.24423	IEG
230	-3.98128	0.000799669	-1.3	Pan-Tissue	Normed	-3.09709	3.09709	CD8-EM
231	-4.82205	0.000118444	-2.95454	Pan-Tissue	Normed	-3.92649	3.92649	IEG2
232	-4.21839	0.000465381	-4.03026	Pan-Tissue	Normed	-3.33219	3.33219	CD4-Naive
233	0.385155	0.7044	-0.556667	Pan-Tissue	Normed	0.152181	0.152181	Treg
234	-8.66487	5.01964e-08	-2.33793	Pan-Tissue	Normed	-7.29933	7.29933	Th17-Resting
235	-2.72885	0.0133318	-0.386591	Pan-Tissue	Normed	-1.87511	1.87511	Poor-Quality
236	-4.59767	0.000196495	-2.13846	Pan-Tissue	Normed	-3.70665	3.70665	CD8-Naive
237	-3.0805	0.00615683	-1.54355	Pan-Tissue	Normed	-2.21064	2.21064	RGCC/MYADM
238	3.59388	0.00193519	1.30406	Pan-Tissue	Normed	2.71328	2.71328	TIMD4/TIM3
239	-5.05925	6.9659e-05	-1.26049	Pan-Tissue	Normed	-4.15702	4.15702	Doublet-Plasmablast
240	-4.87054	0.000106223	-2.26149	Pan-Tissue	Normed	-3.97378	3.97378	BCL2/FAM13A
241	1.70563	0.104373	0.216796	Pan-Tissue	Normed	0.981412	0.981412	IL10/IL19
242	-1.27752	0.216808	-0.375007	Pan-Tissue	Normed	-0.663925	0.663925	Th2-Activated
243	-7.83632	2.27516e-07	-2.484	Pan-Tissue	Normed	-6.64299	6.64299	Th2-Resting
244	3.75274	0.00134753	0.672943	Pan-Tissue	Normed	2.87046	2.87046	ICOS/CD38
245	-0.883981	0.387756	-0.623794	Pan-Tissue	Normed	-0.411442	0.411442	Doublet-Bcell
246	-6.9296	1.3202e-06	-2.35067	Pan-Tissue	Normed	-5.87936	5.87936	Th1-Like
247	1.9605	0.0647668	0.393682	Pan-Tissue	Normed	1.18865	1.18865	CTLA4/CD38
248	-3.604	0.00189116	-0.779087	Pan-Tissue	Normed	-2.72327	2.72327	CD8-Trm
249	1.3325	0.198458	0.383833	Pan-Tissue	Normed	0.702332	0.702332	Th17-Activated
250	-2.25422	0.0361814	-0.41659	Pan-Tissue	Normed	-1.44151	1.44151	Tfh-2
251	2.3261	0.0312329	0.608717	Pan-Tissue	Normed	1.50539	1.50539	OX40/EBI3
252	-3.90801	0.000945366	-3.29179	Pan-Tissue	Normed	-3.0244	3.0244	CD172a/MERTK
253	-4.45932	0.000268909	-3.12643	Pan-Tissue	Normed	-3.5704	3.5704	IEG3
254	-2.451	0.024098	-0.94973	Pan-Tissue	Normed	-1.61802	1.61802	Doublet-Fibroblast
255	1.15478	0.262497	0.0517514	Pan-Tissue	Normed	0.580875	0.580875	SOX4/TOX2
256	-4.9842	8.23548e-05	-3.19672	Pan-Tissue	Normed	-4.08431	4.08431	CD40LG/TXNIP
257	0.703146	0.490492	0.247958	Pan-Tissue	Normed	0.309368	0.309368	Tph
258	3.9217	0.00091625	0.675388	Pan-Tissue	Normed	3.03799	3.03799	Exhaustion
259	-0.7222	0.478967	-0.254391	Pan-Tissue	Normed	-0.319695	0.319695	Tfh-1
260	27.502	1.10047e-44	5.22536	TBRU	Normed	43.9584	43.9584	CellCycle-G2M
261	-16.1623	6.16962e-28	-6.49177	TBRU	Normed	-27.2097	27.2097	Translation
262	17.2228	9.00544e-30	1.66012	TBRU	Normed	29.0455	29.0455	HLA
263	-5.47452	4.18058e-07	-0.682377	TBRU	Normed	-6.37876	6.37876	ISG
264	-22.6076	3.49621e-38	-1.43038	TBRU	Normed	-37.4564	37.4564	Mito
265	-4.76976	7.36204e-06	-0.93075	TBRU	Normed	-5.133	5.133	Doublet-RBC
266	-8.7218	1.66699e-13	-1.07407	TBRU	Normed	-12.7781	12.7781	gdT
267	60.0842	1.26776e-72	5.16238	TBRU	Normed	71.897	71.897	CellCycle-S
268	-6.38302	8.17766e-09	-1.00807	TBRU	Normed	-8.08737	8.08737	Cytotoxic
269	-4.69619	9.82057e-06	-0.385951	TBRU	Normed	-5.00786	5.00786	Doublet-Platelet
270	26.2308	4.35824e-43	2.29671	TBRU	Normed	42.3607	42.3607	NME1/FABP5
271	-0.913803	0.363346	-0.233344	TBRU	Normed	-0.43968	0.43968	Th22
272	-13.9802	5.78195e-24	-1.78294	TBRU	Normed	-23.2379	23.2379	MAIT
273	26.0425	7.60615e-43	5.10646	TBRU	Normed	42.1188	42.1188	CellCycle-Late-S
274	24.5587	6.841e-41	1.6793	TBRU	Normed	40.1649	40.1649	Cytoskeleton
275	-8.92581	6.37262e-14	-0.354372	TBRU	Normed	-13.1957	13.1957	Heatshock
276	-6.3306	1.03217e-08	-0.518985	TBRU	Normed	-7.98625	7.98625	Multi-Cytokine
277	-2.29897	0.0239026	-0.342994	TBRU	Normed	-1.62155	1.62155	TEMRA
278	-21.328	2.58299e-36	-1.93323	TBRU	Normed	-35.5879	35.5879	Doublet-Myeloid
279	9.14098	2.31016e-14	0.7946	TBRU	Normed	13.6364	13.6364	Metallothionein
280	-27.6221	7.82649e-45	-1.84371	TBRU	Normed	-44.1064	44.1064	CD4-CM
281	-19.2284	4.46164e-33	-3.98501	TBRU	Normed	-32.3505	32.3505	IEG
282	-8.79538	1.17858e-13	-1.0214	TBRU	Normed	-12.9286	12.9286	CD8-EM
283	-10.0379	3.38374e-16	-3.30464	TBRU	Normed	-15.4706	15.4706	IEG2
284	-32.1337	4.82348e-50	-4.50317	TBRU	Normed	-49.3166	49.3166	CD4-Naive
285	-9.06071	3.37314e-14	-0.955826	TBRU	Normed	-13.472	13.472	Treg
286	-31.5211	2.25795e-49	-2.95887	TBRU	Normed	-48.6463	48.6463	Th17-Resting
287	-14.7472	2.16976e-25	-0.935317	TBRU	Normed	-24.6636	24.6636	Poor-Quality
288	-33.5054	1.66265e-51	-2.40404	TBRU	Normed	-50.7792	50.7792	CD8-Naive
289	-14.7151	2.48579e-25	-0.822232	TBRU	Normed	-24.6045	24.6045	RGCC/MYADM
290	18.7271	2.85529e-32	2.31499	TBRU	Normed	31.5443	31.5443	TIMD4/TIM3
291	-18.0965	3.07906e-31	-1.00354	TBRU	Normed	-30.5116	30.5116	Doublet-Plasmablast
292	-21.3438	2.44716e-36	-2.87761	TBRU	Normed	-35.6113	35.6113	BCL2/FAM13A
293	14.7005	2.64425e-25	1.03538	TBRU	Normed	24.5777	24.5777	IL10/IL19
294	-4.50565	2.04846e-05	-0.733259	TBRU	Normed	-4.68857	4.68857	Th2-Activated
295	-22.6721	2.82706e-38	-2.98199	TBRU	Normed	-37.5487	37.5487	Th2-Resting
296	23.438	2.34794e-39	1.49129	TBRU	Normed	38.6293	38.6293	ICOS/CD38
297	-15.1358	4.22767e-26	-0.699151	TBRU	Normed	-25.3739	25.3739	Doublet-Bcell
298	-25.1469	1.12206e-41	-2.79098	TBRU	Normed	-40.95	40.95	Th1-Like
299	14.0415	4.43557e-24	1.47952	TBRU	Normed	23.3531	23.3531	CTLA4/CD38
300	0.368573	0.713341	-0.160314	TBRU	Normed	0.146703	0.146703	CD8-Trm
301	10.6481	1.94631e-17	1.55602	TBRU	Normed	16.7108	16.7108	Th17-Activated
302	-5.33616	7.44816e-07	-0.362843	TBRU	Normed	-6.12795	6.12795	Tfh-2
303	14.7177	2.4586e-25	0.839745	TBRU	Normed	24.6093	24.6093	OX40/EBI3
304	-29.1985	9.96789e-47	-4.54671	TBRU	Normed	-46.0014	46.0014	CD172a/MERTK
305	-17.5805	2.23499e-30	-2.55782	TBRU	Normed	-29.6507	29.6507	IEG3
306	-24.809	3.15694e-41	-1.57732	TBRU	Normed	-40.5007	40.5007	Doublet-Fibroblast
307	-4.95903	3.47181e-06	-0.474799	TBRU	Normed	-5.45944	5.45944	SOX4/TOX2
308	-27.4199	1.38984e-44	-4.25287	TBRU	Normed	-43.857	43.857	CD40LG/TXNIP
309	14.0556	4.17377e-24	0.573205	TBRU	Normed	23.3795	23.3795	Tph
310	21.3347	2.52484e-36	1.46927	TBRU	Normed	35.5978	35.5978	Exhaustion
311	-0.502522	0.61657	-0.137265	TBRU	Normed	-0.210018	0.210018	Tfh-1
312	13.1927	1.02785e-16	4.6021	UK-Covid	Normed	15.9881	15.9881	CellCycle-G2M
313	-6.28485	1.40778e-07	-4.54049	UK-Covid	Normed	-6.85147	6.85147	Translation
314	6.73898	3.07622e-08	0.994139	UK-Covid	Normed	7.51198	7.51198	HLA
315	-5.54482	1.67245e-06	-0.58567	UK-Covid	Normed	-5.77665	5.77665	ISG
316	-2.09757	0.0418582	-0.401382	UK-Covid	Normed	-1.37822	1.37822	Mito
317	-2.12983	0.0389494	-0.440464	UK-Covid	Normed	-1.4095	1.4095	Doublet-RBC
318	-3.35439	0.00166945	-0.482707	UK-Covid	Normed	-2.77743	2.77743	gdT
319	33.5785	1.73745e-32	4.78966	UK-Covid	Normed	31.7601	31.7601	CellCycle-S
320	-3.48384	0.0011495	-0.476238	UK-Covid	Normed	-2.93949	2.93949	Cytotoxic
321	-1.65234	0.10575	-0.623907	UK-Covid	Normed	-0.975721	0.975721	Doublet-Platelet
322	8.18916	2.56218e-10	1.17257	UK-Covid	Normed	9.59139	9.59139	NME1/FABP5
323	-1.85722	0.0701373	-0.483466	UK-Covid	Normed	-1.15405	1.15405	Th22
324	-8.87293	2.85619e-11	-1.66213	UK-Covid	Normed	-10.5442	10.5442	MAIT
325	22.6596	1.55639e-25	5.28998	UK-Covid	Normed	24.8079	24.8079	CellCycle-Late-S
326	1.34598	0.185361	0.0805004	UK-Covid	Normed	0.731981	0.731981	Cytoskeleton
327	-0.253288	0.801253	-0.0829487	UK-Covid	Normed	-0.0962304	0.0962304	Heatshock
328	-0.20192	0.840932	-0.310618	UK-Covid	Normed	-0.0752392	0.0752392	Multi-Cytokine
329	3.9478	0.000287625	0.450781	UK-Covid	Normed	3.54117	3.54117	TEMRA
330	-5.77906	7.65686e-07	-1.79444	UK-Covid	Normed	-6.11595	6.11595	Doublet-Myeloid
331	5.67567	1.08137e-06	0.716402	UK-Covid	Normed	5.96603	5.96603	Metallothionein
332	-10.1614	5.29772e-13	-1.39041	UK-Covid	Normed	-12.2759	12.2759	CD4-CM
333	-7.49579	2.48195e-09	-2.98082	UK-Covid	Normed	-8.60521	8.60521	IEG
334	-7.89649	6.64764e-10	-1.10641	UK-Covid	Normed	-9.17733	9.17733	CD8-EM
335	-13.1447	1.16623e-16	-2.59388	UK-Covid	Normed	-15.9332	15.9332	IEG2
336	-10.6897	1.09678e-13	-4.48999	UK-Covid	Normed	-12.9599	12.9599	CD4-Naive
337	-3.94038	0.000294221	-0.985221	UK-Covid	Normed	-3.53133	3.53133	Treg
338	-7.98164	5.0332e-10	-2.371	UK-Covid	Normed	-9.29816	9.29816	Th17-Resting
339	-7.3084	4.61467e-09	-0.70349	UK-Covid	Normed	-8.33586	8.33586	Poor-Quality
340	-14.6757	2.37917e-18	-3.45931	UK-Covid	Normed	-17.6236	17.6236	CD8-Naive
341	-6.76481	2.82163e-08	-0.521728	UK-Covid	Normed	-7.5495	7.5495	RGCC/MYADM
342	8.23972	2.17491e-10	1.2611	UK-Covid	Normed	9.66256	9.66256	TIMD4/TIM3
343	-12.7174	3.63408e-16	-1.4366	UK-Covid	Normed	-15.4396	15.4396	Doublet-Plasmablast
344	-12.4369	7.75978e-16	-3.06143	UK-Covid	Normed	-15.1102	15.1102	BCL2/FAM13A
345	2.16852	0.0356967	0.179495	UK-Covid	Normed	1.44737	1.44737	IL10/IL19
346	-7.74396	1.09593e-09	-0.719152	UK-Covid	Normed	-8.96022	8.96022	Th2-Activated
347	-9.93787	1.04266e-12	-2.74675	UK-Covid	Normed	-11.9819	11.9819	Th2-Resting
348	5.52851	1.76575e-06	0.571694	UK-Covid	Normed	5.75307	5.75307	ICOS/CD38
349	-4.72561	2.47312e-05	-0.889314	UK-Covid	Normed	-4.60676	4.60676	Doublet-Bcell
350	-11.4225	1.31051e-14	-2.07575	UK-Covid	Normed	-13.8826	13.8826	Th1-Like
351	5.83728	6.30295e-07	0.793357	UK-Covid	Normed	6.20046	6.20046	CTLA4/CD38
352	-6.85144	2.11242e-08	-0.754782	UK-Covid	Normed	-7.67522	7.67522	CD8-Trm
353	3.39303	0.00149445	0.434063	UK-Covid	Normed	2.82552	2.82552	Th17-Activated
354	-7.84377	7.89969e-10	-0.717151	UK-Covid	Normed	-9.10239	9.10239	Tfh-2
355	3.63445	0.00073891	0.245322	UK-Covid	Normed	3.13141	3.13141	OX40/EBI3
356	-11.2941	1.89205e-14	-3.02846	UK-Covid	Normed	-13.7231	13.7231	CD172a/MERTK
357	-10.5095	1.86951e-13	-2.92653	UK-Covid	Normed	-12.7283	12.7283	IEG3
358	-7.36734	3.79588e-09	-1.177	UK-Covid	Normed	-8.42069	8.42069	Doublet-Fibroblast
359	-5.52669	1.77645e-06	-0.767183	UK-Covid	Normed	-5.75045	5.75045	SOX4/TOX2
360	-17.2068	6.74545e-21	-3.34805	UK-Covid	Normed	-20.171	20.171	CD40LG/TXNIP
361	4.45124	5.96633e-05	0.42088	UK-Covid	Normed	4.22429	4.22429	Tph
362	5.33417	3.36624e-06	0.526048	UK-Covid	Normed	5.47286	5.47286	Exhaustion
363	-9.00425	1.88514e-11	-0.849613	UK-Covid	Normed	-10.7247	10.7247	Tfh-1
