# Supplementary material for: Reproducible single-cell annotation of programs underlying T cell subsets, activation states and functions
Source: Nat Methods. 2025 Sep 3;22(9):1964–80. doi: 10.1038/s41592-025-02793-1 (PMC12446064; doi:10.1038/s41592-025-02793-1)
Supplement: Supplementary file 5 — Supplementary Tables 1–8. [file 41592_2025_2793_MOESM5_ESM.xlsx]

## Sheet: S1 - Dataset cGEP Information
Table S1. Dataset Information and cGEP Summary. The first table contains a summary of each reference dataset analyzed. The second table contains a summary of cGEPs including their full name, abbreviated name, assigned class, top 3 most strongly associated genes, and which datasets they were derived from.
Dataset Information
	Dataset Name	Publication	Publication Title	Phenotypes	Tissues	Samples	# T-cells
	TBRU	https://www.nature.com/articles/s41590-021-00933-1	Multimodally profiling memory T cells from a tuberculosis cohort identifies cell state associations with demographics, environment and disease	Isolated memory T-cells from active TB or latent TB cases ~5 years after treatment	CD45RA- T-cells magnetically enriched from PBMCs	259	500089
	UK-Covid	https://www.nature.com/articles/s41591-021-01329-2	Single-cell multi-omics analysis of the immune response in COVID-19	PBMCs from Covid-19 and healthy controls	PBMC	133	273516
	COMBAT	https://www.sciencedirect.com/science/article/pii/S0092867422000708	A blood atlas of COVID-19 defines hallmarks of disease severity and specificity	PBMCs from Covid-19 and healthy controls	PBMC	138	399599
	HIV-Vaccine	https://www.cell.com/cell/fulltext/S0092-8674(21)00583-3	Integrated analysis of multimodal single-cell data	PBMCs from donors at day 0, 3, and 7 after receiving an HIV vaccine	PBMC	24	73259
	Pan-Tissue	https://www.science.org/doi/10.1126/science.abl5197	Cross-tissue immune cell analysis reveals tissue-specific features in humans	16 human organs from deceased donors	Ileum, lung, lung-draining LN, mesenteric LN, bone marrow, skeletal muscle, liver, spleen, omentum, caecum, thymus, duodenum, transverse colon, sigmoid colon, jejeunal lamina propria, jejeunum epithelium,	93	154314
	Pan-Cancer	https://www.science.org/doi/10.1126/science.abe6474	Pan-cancer single-cell landscape of tumor-infiltrating T cells	Tumor, matched normal adjacent tissue	basal cell carcinoma, b-cell lymphoma, breast cancer, normal breast, esophageal cancer, normal esophagus, fallopian tube carcinoma, hepatocellular carcinoma, normal liver, lung cancer, matched normal lung, multiple myeloma, ovarian cancer, normal ovary, pancreatic cancer, normal pancreas, renal carcinoma, normal kidney, thyroid carcinoma, normal thyroid, uterine carcinoma, normal uterus	177	215035
	AMP-RA	https://www.nature.com/articles/s41586-023-06708-y	Deconstruction of rheumatoid arthritis synovium defines inflammatory subtypes	Synovial biopsies from Rheumatoid Arthritis or Osteoarthritis patients	Synovial biopsies	81	94048
cGEP Information
	GEP Info						Found in Dataset
	Short Name	Abbreviated Name	Long_Name	GEP Class	# Datasets Found	Top Genes	TBRU	UK-Covid	COMBAT	HIV-Vaccine	Pan-Tissue	Pan-Cancer	AMP-RA
	CD8-EM	CD8-EM	CD8 Effector Memory	Lineage	7	CMC1, GZMK, AB_CD244	TRUE	TRUE	TRUE	TRUE	TRUE	TRUE	TRUE
	MAIT	MAIT	MAIT	Lineage	7	SLC4A10, AB_TCR-V-7.2, KLRB1	TRUE	TRUE	TRUE	TRUE	TRUE	TRUE	TRUE
	Treg	Treg	Treg	Lineage	7	FOXP3, AB_CD25, RTKN2	TRUE	TRUE	TRUE	TRUE	TRUE	TRUE	TRUE
	CD4-Naive	CD4-Naive	CD4 Naive	Lineage	6	CCR7, SELL, LEF1	TRUE	TRUE	FALSE	TRUE	TRUE	TRUE	TRUE
	TEMRA	TEMRA	TEMRA	Lineage	6	KIR2DL3, KLRC2, TYROBP	FALSE	TRUE	TRUE	TRUE	TRUE	TRUE	TRUE
	CD4-CM	CD4-CM	CD4 T Central Memory	Lineage	5	LIMS1, PASK, ITM2A	TRUE	TRUE	TRUE	TRUE	FALSE	FALSE	TRUE
	gdT	gdT	Gamma Delta T	Lineage	4	TRDV2, TRDC, AB_TCR-Vd2	TRUE	TRUE	TRUE	TRUE	FALSE	FALSE	FALSE
	Th17-Resting	Th17-Rest.	Th17 Resting	Lineage	4	CCR6, CTSH, TTC39C-AS1	TRUE	TRUE	TRUE	TRUE	FALSE	FALSE	FALSE
	Th2-Resting	Th2-Rest.	Th2 Resting	Lineage	4	NEFL, KRT1, PTGDR2	TRUE	TRUE	TRUE	TRUE	FALSE	FALSE	FALSE
	Th1-Like	Th1-Like	Th1-Like	Lineage	3	LYAR, GZMK, IFNG-AS1	TRUE	TRUE	FALSE	TRUE	FALSE	FALSE	FALSE
	CD8-Naive	CD8-Naive	CD8 Naive	Lineage	3	LINC02446, CD8B, AB_CD8	FALSE	TRUE	FALSE	TRUE	TRUE	FALSE	FALSE
	CD8-Trm	CD8-Trm	CD8 Tissue Resident Memory	Lineage	3	LINC02446, ZNF683, AB_CD8a	TRUE	FALSE	FALSE	FALSE	FALSE	TRUE	TRUE
	Tfh-2	Tfh-2	T follicular helper 2	Lineage	3	LHFP, CD200, LINC01991	FALSE	FALSE	FALSE	FALSE	TRUE	TRUE	TRUE
	Th2-Activated	Th2-Act.	Th2-Activated	Lineage	2	HPGDS, IL17RB, CHDH	TRUE	TRUE	FALSE	FALSE	FALSE	FALSE	FALSE
	Th17-Activated	Th17-Act.	Th17-Activated	Lineage	2	IL26, IL17A, NMU	TRUE	FALSE	TRUE	FALSE	FALSE	FALSE	FALSE
	Tph	Tph	T peripheral helper	Lineage	1	LAG3, LAIR2, SLC27A2	FALSE	FALSE	FALSE	FALSE	FALSE	FALSE	TRUE
	Tfh-1	Tfh-1	T follicular helper 1	Lineage	1	TOX2, SMCO4, KSR2	FALSE	FALSE	FALSE	FALSE	FALSE	TRUE	FALSE
	Cytoskeleton	Cytosk.	Actin Cytoskeleton	Functional	7	ACTB, ACTG1, PFN1	TRUE	TRUE	TRUE	TRUE	TRUE	TRUE	TRUE
	CellCycle-G2M	G2M-phase	Cell Cycle G2M Phase	Functional	7	CDC20, CCNB2, DLGAP5	TRUE	TRUE	TRUE	TRUE	TRUE	TRUE	TRUE
	CellCycle-S	S-phase	Cell Cycle S Phase	Functional	7	GINS2, TK1, TYMS	TRUE	TRUE	TRUE	TRUE	TRUE	TRUE	TRUE
	Cytotoxic	Cytotoxic	Cytotoxic	Functional	7	FGFBP2, GZMH, NKG7	TRUE	TRUE	TRUE	TRUE	TRUE	TRUE	TRUE
	ISG	ISG	Interferon Stimulated Genes	Functional	7	ISG15, MX1, IFIT3	TRUE	TRUE	TRUE	TRUE	TRUE	TRUE	TRUE
	CellCycle-Late-S	Late-S-phase	Cell Cycle Late S-phase	Functional	6	HIST1H1B, HIST1H4C, HIST1H3G	TRUE	FALSE	TRUE	TRUE	TRUE	TRUE	TRUE
	HLA	HLA	HLA	Functional	6	HLA-DRA, HLA-DRB1, CD74	TRUE	TRUE	TRUE	FALSE	TRUE	TRUE	TRUE
	NME1/FABP5	NME1/FABP5	NME1/FABP5	Functional	6	NME1, FABP5, HSP90AB1	TRUE	TRUE	TRUE	FALSE	TRUE	TRUE	TRUE
	Translation	Translation	Translation	Functional	6	RPS18, RPS6, RPS12	TRUE	TRUE	TRUE	TRUE	TRUE	FALSE	TRUE
	IL10/IL19	IL10/IL19	IL10/IL19	Functional	5	CAV1, PTPN3, FXYD2	FALSE	TRUE	TRUE	TRUE	TRUE	FALSE	TRUE
	RGCC/MYADM	RGCC/MYADM	RGCC/MYADM	Functional	5	MYADM, ANXA1, LMNA	TRUE	FALSE	FALSE	TRUE	TRUE	TRUE	TRUE
	Metallothionein	Metallothionein	Metallothionein	Functional	4	MT1X, MT2A, MT1E	FALSE	TRUE	TRUE	FALSE	TRUE	TRUE	FALSE
	Multi-Cytokine	Multi-Cytokine	Multi-Cytokine	Functional	4	CCL4, CCL4L2, CCL3	FALSE	TRUE	FALSE	FALSE	TRUE	TRUE	TRUE
	Th22	Th22	Th22	Functional	4	CCR10, S100A10, LGALS1	TRUE	TRUE	TRUE	FALSE	TRUE	FALSE	FALSE
	BCL2/FAM13A	BCL2/FAM13A	BCL2/FAM13A Pro-survival	Functional	3	BCL2, FAM13A, CISH	TRUE	TRUE	FALSE	TRUE	FALSE	FALSE	FALSE
	CTLA4/CD38	CTLA4/CD38	CTLA4/CD38 Activation	Functional	3	LGMN, AB_CD278, AB_CD38-1	TRUE	FALSE	TRUE	FALSE	TRUE	FALSE	FALSE
	Heatshock	Heatshock	Heatshock	Functional	3	HSPA1A, HSP90AA1, HSPA1B	FALSE	FALSE	FALSE	FALSE	TRUE	TRUE	TRUE
	OX40/EBI3	OX40/EBI3	OX40/EBI3 Activation	Functional	2	EBI3, TNFRSF4, TNFRSF18	FALSE	FALSE	FALSE	FALSE	FALSE	TRUE	TRUE
	ICOS/CD38	ICOS/CD38	ICOS/CD38 Activation	Functional	2	AB_CD278, ACTG1, AB_CD71	TRUE	FALSE	FALSE	TRUE	FALSE	FALSE	FALSE
	SOX4/TOX2	SOX4/TOX2	SOX4/TOX2	Functional	2	SOX4, PRDM16, SERTAD4-AS1	TRUE	FALSE	FALSE	TRUE	FALSE	FALSE	FALSE
	TIMD4/TIM3	TIMD4/TIM3	TIMD4/TIM3	Functional	2	TIMD4, HAVCR2, GZMB	FALSE	TRUE	TRUE	FALSE	FALSE	FALSE	FALSE
	CD40LG/TXNIP	CD40LG/TXNIP	CD40LG/TXNIP	Functional	2	CD40LG, TXNIP, FKBP5	FALSE	FALSE	FALSE	FALSE	TRUE	TRUE	FALSE
	CD172a/MERTK	CD172a/MERTK	CD172a/MERTK	Functional	2	TXNIP, AB_CD172a, AB_MERTK	TRUE	FALSE	FALSE	TRUE	FALSE	FALSE	FALSE
	Exhaustion	Exhaustion	Exhaustion	Functional	1	LAG3, HAVCR2, TIMD4	FALSE	FALSE	FALSE	FALSE	FALSE	TRUE	FALSE
	Doublet-RBC	Dbt-RBC	Doublet RBC	Doublet Lineage	7	HBA2, HBA1, HBB	TRUE	TRUE	TRUE	TRUE	TRUE	TRUE	TRUE
	Doublet-Platelet	Dbt-Platelet	Doublet Platelet	Doublet Lineage	5	PPBP, NRGN, TREML1	TRUE	TRUE	TRUE	TRUE	TRUE	FALSE	FALSE
	Doublet-Plasmablast	Dbt-Plasmablast	Doublet Plasmablast	Doublet Lineage	4	JCHAIN, IGKC, IGKV3-20	FALSE	TRUE	TRUE	FALSE	TRUE	FALSE	TRUE
	Doublet-Bcell	Dbt-Bcell	Doublet Bcell	Doublet Lineage	3	BANK1, CD22, IGHD	TRUE	FALSE	FALSE	FALSE	FALSE	TRUE	TRUE
	Doublet-Myeloid	Dbt-Myeloid	Doublet Myeloid	Doublet Lineage	3	S100A8, S100A9, LYZ	FALSE	TRUE	TRUE	TRUE	FALSE	FALSE	FALSE
	Doublet-Fibroblast	Dbt-Fibroblast	Doublet Fibroblast	Doublet Lineage	2	LUM, COL1A2, COL3A1	FALSE	FALSE	FALSE	FALSE	FALSE	TRUE	TRUE
	IEG	IEG	Immediate Early Gene	Artifact	6	JUN, FOS, FOSB	TRUE	TRUE	TRUE	FALSE	TRUE	TRUE	TRUE
	IEG2	IEG2	Immediate Early Gene 2	Artifact	4	JUNB, ZFP36, ZNF331	TRUE	FALSE	FALSE	TRUE	FALSE	TRUE	TRUE
	IEG3	IEG3	Immediate Early Gene 3	Artifact	2	YPEL5, JUNB, NR4A2	FALSE	TRUE	FALSE	FALSE	FALSE	FALSE	TRUE
	Poor-Quality	Poor-Quality	Poor Quality	Artifact	6	LINC-PINT, MALAT1, SYNE2	TRUE	TRUE	TRUE	TRUE	TRUE	FALSE	TRUE
	Mito	Mito	Mitochondrial Genes	Artifact	5	MT-CO2, MT-CYB, MT-CO3	TRUE	TRUE	TRUE	TRUE	TRUE	FALSE	FALSE

## Sheet: S2 - cGEP Top Genes
Table S2. Marker genes. Top 200 marker genes for each cGEP ranked by average gene spectra score with cells colored by this score.
	Th2-Resting	gdT	CD4-CM	TEMRA	Th2-Activated	Th17-Resting	CD8-Trm	Th17-Activated	CD8-Naive	CD4-Naive	Treg	MAIT	Th1-Like	CD8-EM	Tph	Tfh-1	Tfh-2	CTLA4/CD38	BCL2/FAM13A	Cytoskeleton	Heatshock	ICOS/CD38	SOX4/TOX2	TIMD4/TIM3	CD40LG/TXNIP	CD172a/MERTK	IEG3	OX40/EBI3	Multi-Cytokine	Th22	Translation	CellCycle-G2M	CellCycle-S	Cytotoxic	ISG	CellCycle-Late-S	HLA	NME1/FABP5	Exhaustion	IL10/IL19	RGCC/MYADM	Metallothionein	Doublet-Platelet	Doublet-Myeloid	Doublet-Bcell	Doublet-Fibroblast	Doublet-RBC	Doublet-Plasmablast	IEG2
	NEFL	TRDV2	LIMS1	KIR2DL3	HPGDS	CCR6	LINC02446	IL26	LINC02446	CCR7	FOXP3	SLC4A10	LYAR	CMC1	LAG3	TOX2	LHFP	LGMN	BCL2	ACTB	HSPA1A	AB_CD278	SOX4	TIMD4	CD40LG	TXNIP	YPEL5	EBI3	CCL4	CCR10	RPS18	CDC20	GINS2	FGFBP2	ISG15	HIST1H1B	HLA-DRA	NME1	LAG3	CAV1	MYADM	MT1X	PPBP	S100A8	BANK1	LUM	HBA2	JCHAIN	JUNB
	KRT1	TRDC	PASK	KLRC2	IL17RB	CTSH	ZNF683	IL17A	CD8B	SELL	AB_CD25	AB_TCR-V-7.2	GZMK	GZMK	LAIR2	SMCO4	CD200	AB_CD278	FAM13A	ACTG1	HSP90AA1	ACTG1	PRDM16	HAVCR2	TXNIP	AB_CD172a	JUNB	TNFRSF4	CCL4L2	S100A10	RPS6	CCNB2	TK1	GZMH	MX1	HIST1H4C	HLA-DRB1	FABP5	HAVCR2	PTPN3	ANXA1	MT2A	NRGN	S100A9	CD22	COL1A2	HBA1	IGKC	ZFP36
	PTGDR2	AB_TCR-Vd2	ITM2A	TYROBP	CHDH	TTC39C-AS1	AB_CD8a	NMU	AB_CD8	LEF1	RTKN2	KLRB1	IFNG-AS1	AB_CD244	SLC27A2	KSR2	LINC01991	AB_CD38-1	CISH	PFN1	HSPA1B	AB_CD71	SERTAD4-AS1	GZMB	FKBP5	AB_MERTK	NR4A2	TNFRSF18	CCL3	LGALS1	RPS12	DLGAP5	TYMS	NKG7	IFIT3	HIST1H3G	CD74	HSP90AB1	TIMD4	FXYD2	LMNA	MT1E	TREML1	LYZ	IGHD	COL3A1	HBB	IGKV3-20	ZNF331
	AB_CD49a	TRGV9	CORO1B	KIR3DL2	PTGDR2	PTPN13	CD8B	CREB3L3	S100B	AB_CD27-2	AB_CD39	NCR3	IL7R	CST7	PDCD1	PEG10	GNG4	CD59	PIM1	CFL1	DNAJB1	AB_CD38-2	MME	LIM2	CH25H	AB_CD138-1	EIF1	PRKCDBP	IFNG	LMNA	RPL3	PLK1	DTL	PRF1	IFI6	HIST1H3B	HLA-DQA1	C1QBP	TMEM155	AB_CD38-2	RGCC	MT1G	SPARC	S100A12	FCRL5	DCN	HBM	IGHG1	ZFP36L2
	CDO1	KLRC1	AB_CD278	KLRC3	LINC01229	PDE4D	CD8A	COL5A3	NELL2	TCF7	IL2RA	AB_CD161	CXCR3	CCL5	LINC01943	CXCR5	LHFPL6	LAG3	CDK6	CORO1A	HSPH1	GAPDH	CASC15	GZMA	CRYBG1	AB_CD324	PPP1R15A	PKM	XCL2	S100A6	RPS3	UBE2C	UHRF1	PRSS23	IFIT1	RRM2	HLA-DQB1	PAICS	PTMS	IL19	TAGLN2	MT1H	TUBB1	VCAN	TCL1A	FN1	AB_CD235ab	IGHG3	NR4A2
	GATA3	TRGC1	TMSB4X	KIR3DL1	GATA3-AS1	AQP3	HOPX	IL17F	AB_CD8a	ACTN1	FANK1	CEBPD	NSG1	AB_TIGIT	CD4	ANKRD34B	LINC01480	POU2AF1	MAL	MYL6	HSPD1	MIR4435-2HG	SMIM24	LAG3	AIM1	CXCR4	ARL4A	CCL22	TNF	S100A4	RPS4X	CCNB1	PCLAF	CX3CR1	IFI44L	SPC25	HLA-DPA1	HSPD1	GZMB	MYB	CRIP1	MT1F	CAVIN2	CST3	MEF2C	MGP	ALAS2	IGKV1-5	CXCR4
	EDN3	AB_CD94	AB_CD126	KIR2DL1	FSTL4	AB_CD196	ITGA1	PKHD1	AB_CD73	AB_CD27-1	AB_CD95	AB_CD26	PTGER2	EOMES	CTLA4	PVALB	NMB	RASGRP4	SLC40A1	ARPC1B	HSPE1	MXD4	CHST2	AB_CD38-1	ZFP36L2	AB_Siglec-8	TSC22D3	PTP4A3	CCL3L3	VIM	RPL13	HMMR	CLSPN	GZMB	OAS1	CDCA5	HLA-DRB5	ENO1	CADM1	IL10	KLF6	MT1M	PF4	MNDA	IGHM	SPARC	HBQ1	IGKV4-1	TNFAIP3
	AB_CD82	AB_TCR-V-9	AB_CD279	AB_CD158b	GAP43	TNFRSF4	KLRC1	C2CD4B	AB_CD45RA	RPS13	IKZF2	AB_CD195	TXNIP	CD8A	SRGN	PARD3	CXCL13	MAF	SOCS2	CLIC1	HSP90AB1	NEAT1	IGFBP2	CLIC3	TNFSF8	AB_CD68	ZNF331	TNFRSF8	XCL1	AIRE	RPS3A	BIRC5	CDC45	ADGRG1	RSAD2	NUSAP1	AB_HLA-DR	RAN	SLC27A2	TIMD4	S100A10	CCNA1	GNG11	FCN1	ARHGAP24	COL1A1	HBD	IGHA1	CREM
	ZP1	AB_CD3-1	FYB1	SH2D1B	BACE2	LTB	KLRC2	CTSH	YBX3	AB_GP130	CTLA4	IL23R	AB_CXCR3	AB_CD8a	CD7	IL6ST	ICA1	AB_CD275-1	EDA	ARPC2	CACYBP	AB_CD38-1	GNG4	APOBEC3H	IL7R	AB_Rat-IgG1-2	RNF139	CAVIN3	CCL3L1	PI16	EEF1A1	CENPF	MCM10	GNLY	XAF1	HIST1H2AJ	HLA-DPB1	CCT5	CD27	SLC9A2	VIM	SLC30A1	MYL9	AB_CLEC12A	IGKC	TIMP3	AHSP	IGHV3-30	FTH1
	GATA3-AS1	AB_CD3-2	AB_CD45RO	KIR2DL4	PKIB	CMTM6	CCL5	ADAM12	CD248	AB_CD109	TIGIT	LTK	IGFBP3	CD8B	AB_CD279	NTRK3	IGFL2	TNFRSF1B	USP10	TPM4	HSPA8	GBP2	SPIB	SERPINE1	NR3C1	H1FX	AREG	DNPH1	TNFSF9	LGALS3	RPLP1	ASPM	FAM111B	SPON2	STAT1	HJURP	HLA-DMA	NPM1	CD38	HAVCR2	AHNAK	GRHL3	GP9	AB_CD33	CD24	IGFBP7	CA1	IGHV3-23	SRGN
	NRIP3	TYROBP	AB_CD109	KLRF1	CACNA1D	IL7R	CD7	IL22	REG4	GLTSCR2	STAM	TLE1	ZFP36L2	AB_KLRG1_MAFA	TNFRSF18	SLC7A10	SERPINE2	ZBTB32	PTGER2	TMSB10	DNAJA1	SLC25A5	VSIG4	GNLY	IL6ST	AB_CD202b	DUSP1	NINJ1	NFKBID	S100A11	RPS2	TPX2	CDT1	FCGR3A	LY6E	TOP2A	HLA-DQA2	HSPE1	VCAM1	HMOX1	ATP2B1	MT1A	ITGA2B	AB_CD35	MS4A1	PLA2G2A	MYL4	IGLV2-14	BTG1
	AB_CD102	KLRD1	AB_CD95	NCR1	IL5	TNFSF13B	LINC01871	RORC	ACTN1	FHIT	HACD1	CA2	MS4A1	GZMM	PTMS	LIMS2	CPM	MIR4435-2HG	ADTRP	S100A4	DNAJA4	COTL1	TOX2	IFI27	FYB1	PLP2	BCAS2	LTA	EGR2	ANXA2	RPL10	TOP2A	CDC6	PLEK	EPSTI1	HIST1H3F	HLA-DMB	SRM	PRF1	PHF21B	CFAP20	TRAJ4	F13A1	FCER1G	OSBPL10-AS1	SPARCL1	AB_CD71	MZB1	DDIT4
	TMPRSS11E	AB_CD226-1	AB_CD28	AB_CD158	GATA3	AB_CD26	AB_CD244	LCN6	AB_CD55	NOSIP	AB_CD194	ME1	CCL5	SH2D1A	HAVCR2	POU2AF1	KSR2	CTLA4	DACT1	TMSB4X	HSPB1	TMSB10	RAB32	CD38	ADAM19	RPL30	FTH1	CD82	IFIT2	FUT7	RPS27A	TROAP	E2F1	KLRD1	OASL	TYMS	MSC	LDHA	GZMA	ZBTB32	TSC22D3	GNG4	MPIG6B	AB_Iglightchaink	FCRL1	AB_CD196	SLC25A37	IGHV4-39	TENT5C
	AB_CD99	AB_CD43	KLRB1	LAT2	SCN2A	AB_CD127	XCL1	AB_CD71	AIF1	TXK	HPGD	AB_CD26-2	AB_CD127	AB_CD8	SMOX	FZD3	DOK5	LIMS1	LTB	SH3BGRL3	ZFAND2A	TMSB4X	LINC01222	CCR5	CMTM8	AB_CD370	CYCS	XIRP1	FASLG	AB_CD82	RPL21	KIF14	PCNA	S1PR5	IFIT2	KIF15	AB_CD95	PRDX1	RAB38	MIR4422HG	EZR	FAXC	CMTM5	IFI30	CD19	CALD1	SLC4A1	IGKV3-11	DUSP2
	FXYD7	ZBTB16	TBC1D4	AB_CD158e1	CCR3	TNFRSF18	CTSW	PTPRD	NT5E	RPS3A	IL32	RORC	GBP5	DUSP2	RDH10	EDN3	BTLA	PTMS	TRAT1	LCP1	HSPA6	UCP2	AB_CD38-1	AB_CD86	DDIT4	H3F3B	CXCR4	SDC4	NR4A2	CRIP1	RPS14	CENPA	RRM2	CST7	HERC5	PKMYT1	COTL1	DCTPP1	NKG7	POU2AF1	S100A11	AB_CD71	CLU	AB_CD11b-1	COL19A1	CTGF	SELENBP1	IGHG4	SLC2A3
	TNFRSF4	HOPX	MAF	TRDV1	ZP1	USP10	CD63	SMCO4	CLEC11A	CHRM3-AS2	DUSP4	IL4I1	ITGA4	DTHD1	TIMP1	TSPAN12	MAP7	CD38	DPP4	CNN2	UBB	CYTOR	CD79A	CCL5	ICOS	AB_Rat-IgG1-1	NSMCE3	LINC01229	NR4A3	PLP2	RPS8	CDKN3	MCM4	EFHD2	CMPK2	ESCO2	CDCA7	PPP1R14B	CD200R1	COL19A1	JUND	IGSF3	PF4V1	AB_CD32	FCRLA	C1S	SNCA	IGLV3-1	AREG
	C1orf162	KLRG1	ARID5B	AB_CD56-1	ZG16B	LGALS3	KLRD1	AB_CD146	CD8A	FAM65B	F5	PRSS35	AB_CD49d	KLRG1	ZBED2	SCGB3A1	NEBL	AB_CD223	MDFIC	MYL12A	MRPL18	CD52	VPREB1	MIR4435-2HG	BTG1	AB_CD275-1	CSRNP1	BHLHE40-AS1	ZFP36L1	CAPG	EEF1B2	MKI67	ASF1B	C1orf21	EIF2AK2	CDK1	GZMA	YBX1	TSC22D1	AB_CD38-1	ARL4A	CFAP58	AB_CD41	AB_CD64	MARCKS	PRG4	PDZK1IP1	IGLC2	JUND
	FXYD5	KLRB1	AQP3	TRDC	CRLF2	AB_mouseCD49f	CLIC3	PTPN13	AB_CD314	AB_CD7	ICA1	TRAV1-2	FXYD2	CRTAM	PLPP1	CHI3L2	LINC01281	KRT24	CD55	COTL1	FKBP4	S1PR4	DBN1	OTOF	SARAF	RPS4Y1	AB_CD62L	VDR	AB_CD57	AB_CD194	RPL13A	KIF20A	MCM2	AB_CD57	USP18	E2F8	ANXA5	CCT6A	APBB2	TMEM155	TUBA1A	CAVIN3	PTGS1	CD14	CD79A	MMP2	GYPA	IGLV3-21	PIK3R1
	CAPG	AB_CD102	TRIB2	NCAM1	KLRB1	RORC	CD9	TMPRSS3	LEF1	RPL32	LAYN	ZBTB16	AB_CD49a	LYST	SPOCK2	MAP7	MS4A6A	LINC01943	DST	RAC2	CHORDC1	MT1E	SLC12A8	CD70	SOCS1	AB_CD338	JUND	SMS	CRTAM	TMSB10	RPL18A	CEP55	CENPU	FCRL6	IFI44	KIFC1	DUSP4	NCL	RDH10	CD38	ADGRE5	AB_HLA-DR	GP1BB	NEAT1	PAX5	CST3	AB_CD235a	IGHV5-51	DUSP5
	PKP2	AB_CD119	RNASET2	FCER1G	LAT2	TIMP1	CD52	CA10	CCR7	RPS8	TBC1D4	CXCR6	HOPX	CD160	BST2	GNG4	PGM2L1	PLS3	PCED1B	ACTR3	AHSA1	ACTB	TRDC	SLC27A2	ITK	AB_CD45-2	TUBA1A	SYNGR2	PMAIP1	AB_CD99	RPS5	CENPE	STMN1	ASCL2	MX2	UBE2C	CD70	IMPDH2	SEMA4A	BTNL8	PPP1R15A	H2AZ1	PRKAR2B	CSF3R	BCL11A	CRTAC1	HBG2	IGHV3-7	BTG2
	TNFSF10	AB_CD44-2	TSHZ2	FCGR3A	IL9R	TOB1	CAPG	GPR25	TOB1	AK5	AB_CD278	AB_KLRG1_MAFA	AB_CD2	GZMA	ETV7	ICA1	POU2AF1	AB_CD279	CMTM6	WDR1	BAG3	PCLAF	AB_CD279	PACSIN1	SRGN	AB_CD24	UBC	MIR155HG	TAGAP	TAGLN2	RPL10A	HMGB2	MCM7	ZEB2	OAS3	DIAPH3	SUB1	EIF5A	NAB1	SESTD1	CD44	AB_CD49b	ITGB3	IL1B	TCF4	MMP3	TRIM58	IGKV1-9	SOCS3
	NEFM	AB_CD11b-2	GPR183	CTSW	IL13	AB_CD2	AB_CD44-1	S100P	NUCB2	ADTRP	LINC01943	LINC01644	DUSP2	NKG7	PRDM1	SESN1	RDH10	AB_CD366	RNF157	PSME2	UBC	DUSP4	SLC7A3	GAPDH	SOCS3	AB_CD325	DNAJB1	BCL2L1	MAP3K8	ANXA1	TPT1	GTSE1	DUT	TTC38	IRF7	CKAP2L	LGALS1	SNRPE	HMOX1	LAYN	LRRFIP1	LINC01119	LINC00853	AIF1	C1orf186	IGFBP5	EPB42	IGLV1-51	PDE4B
	SEMA5A	AB_CLEC2	TMEM156	AB_CD16	LMO4	IL4I1	AB_CXCR3	NTRK2	CARS	TRABD2A	ENTPD1	COLQ	IL32	AOAH	ADGRG1	CD79A	DRAIC	S1PR4	TRADD	ARHGDIB	DOK2	MYL6B	CXXC5	CXCR3	CCR4	AB_LOX-1	CHMP1B	KRT7	IL2	EMP3	RPL19	PTTG1	PKMYT1	CTSW	SAMD9L	MKI67	AB_CD49d	RPL22L1	PDCD1	TAGLN3	CRIP2	AB_CD278	PDZK1IP1	CYBB	LINC00926	HTRA1	GRM1	IGLV1-40	EIF1
	PTGER2	AB_CD93	TOX2	ITGAD	CD200R1L	NR1D1	GNLY	MCAM	PECAM1	AB_CD38-2	RGS1	TRBV6-4	STOM	CCL3L1	MYO7A	PTPN14	ARMH1	AQP3	SOCS3	IL32	DEDD2	AB_CD49d	ZNF667	UCP2	MAF	BTG1	BTG1	IL1R2	EGR3	CLU	RPL32	NEK2	MYBL2	AB_CD271	IFITM1	KIF23	BATF3	PPA1	LYST	GZMK	EMP1	TMPRSS11B	AB_CD49b	SERPINA1	IGLC2	CLU	IFIT1B	IGLV3-25	FOSL2
	AB_CD224	IL18RAP	UCP2	GNLY	FFAR3	AB_CD28	ITM2C	C9orf139	LRRN3	RPL11	GBP5	TMIGD2	AB_CD99	PLEK	MYO1E	ITM2A	TUBA3D	IL1R1	AB_CD127	CAP1	DNAJB4	PFN1	AB_CD21	CD8A	PRDM1	AB_CD144	TNFAIP3	LAIR2	CSF2	CD52	RPS23	PIMREG	MCM5	B2M	ISG20	TUBB	PSMB9	CCT2	GNLY	AFF3	ANXA2	GALR3	AB_CD62P	MS4A6A	VPREB3	CFD	CR1L	IGHV4-34	PTGER4
	AB_CD44-2	AB_CD307c	IGFBP4	IKZF2	AB_CD161	KLRB1	KLRC4	LRP12	CD79A	RPL30	NCF4	BLK	IL10RA	XCL2	MAF	FBLN7	TSPAN12	IL21	HDGFL3	GAPDH	STIP1	GMFG	TRDV1	CD52	TSC22D3	AB_CCR10	SLC2A3	IL2RA	KLF6	ITGB1	RPS15A	KIF2C	ZWINT	C12orf75	PLSCR1	NCAPG	FABP5	RANBP1	CST7	CD27	TSPAN2	CXCL13	LINC00989	CSTA	FAM129C	SST	FABP7	IGHV3-33	YPEL5
	USP46	AB_KLRG1_MAFA	ST8SIA1	AB_CD45RA	PTPN5	AB_CD224	FES	IL1R2	MXRA8	RPS23	TTN	LST1	B2M	HLA-DPB1	CD59	CPA5	RGS4	HAVCR2	UPP1	ARPC5	TCP1	MT-CO1	AB_CD38-2	AB_CD49d	SH3TC1	FTL	DNAJA1	KCNN4	SPRY1	TXN	RPL26	AURKB	CHEK1	LINC02384	GBP1	HIST1H2AH	APOBEC3H	TPI1	DUSP5	DRAIC	FOS	ATP6V0D2	TMEM40	CTSS	KHDRBS2	ADIRF	LINC02730	IGKV3-15	REL
	CCR4	AB_CD63	TIGIT	AB_CD335	TNFSF11	S100A4	S100A6	TMEM167A	DSEL	RPL22	AB_CD307c	ADAM12	AB_Integrin-7	FCRL3	FLT1	SMAD1	PHEX	AB_CD152	PLXNA4	CALR	DNAJB6	ARHGDIB	NKD2	FABP5	FYB	AB_CD22	KLF2	GNA15	RILPL2	SEPT11	RPS16	FAM64A	DHFR	SH3BGRL3	IFI35	PBK	HLA-DOA	MIF	ZBED2	NUCB2	MCL1	TUBB3	BEND2	TNFAIP2	CNTNAP2	GSN	SPTA1	IGHV4-59	CD69
	IL7R	S100B	SMCO4	ITGAX	MSRB3	FRY	LGALS1	CCR9	NOSIP	SATB1	TNFRSF1B	SCART1	XCL1	AB_CD81	CXCR6	PRKAR2B	FABP5	COL5A3	AP3M2	PPP1CA	MB21D1	CTLA4	NREP	CYTOR	JUNB	PFDN5	CD69	DIRAS3	SLA	SH3BGRL3	RPL23A	CDCA8	HELLS	HLA-C	PARP9	GTSE1	HLA-A	PGAM1	ASCL1	PGM2L1	AB_CD44-1	EXO1	LY6G6F	TYROBP	BLNK	ASPN	LINC00570	IGLV1-44	GADD45A
	AB_CD62L	CD300A	CD52	CD63	TMEM273	CFH	SH3BGRL3	S100A6	ARMH1	LDHB	PMAIP1	IL18RAP	TRADD	ENC1	OTUD1	IL6R	ENOX1	ANXA2	CYLD	ARPC3	NR4A1	CORO1A	FBLN2	AB_CD49b	CD4	AB_CD14-1	SELENOK	PGAM1	HECW2-AS1	AHNAK	RPL7A	CDCA3	FEN1	PROK2	LAMP3	AURKB	CLIC1	NHP2	FKBP1A	FABP5	TNFAIP3	H4C3	AB_CD42b	AB_CD93	FCRL2	BGN	CDH16	IGHV1-18	AIM1
	AB_mouseCD49f	AB_CD205	COTL1	AB_CD244	PPARG	AB_CD26-2	MATK	OSTF1	CPA5	PLAC8	C15orf53	AB_CD69	ITM2B	CD74	FAM3C	CHGB	IGFBP4	FOXB1	ARID5B	DOK2	SERPINH1	ARPC3	PARD3	TRBV27	EPGN	AB_CD48	JUN	ENO1	GADD45B	ALOX5AP	RPL18	KIF4A	MCM3	CES1	BST2	H4C3	C12orf75	EBNA1BP2	FAM3C	CD81	GPR183	BHLHE40	LTBP1	SPI1	SPIB	SFRP2	TAL1	IGKV1-12	CSRNP1
	RAMP3	AB_CD271	CD27	KLRD1	AB_CD278	CCL20	FXYD2	CCL20	SELL	GAS5	ARID5B	IL7R	BTG1	PECAM1	SNX9	LIMS1	ITM2A	TMSB10	MCOLN3	S100A6	SOD1	DYNLL1	NUCB2	CXCR6	GPR183	FAU	HSPA5	G0S2	MIR155HG	AB_CD103	RPL9	KIF23	BRCA1	RAP1B	OAS2	ANLN	TAP1	TIMM13	SNAP47	LGALS3	YPEL5	SYT7	SNCA	TYMP	COBLL1	CYR61	SMOX	IGLC3	ARL4C
	AB_CD194	AB_CD45RB	ICA1	NCR3	EGLN3	TPO	XCL2	AB_CD28	PASK	TSHZ2	ZC2HC1A	DPP4	CLDND1	AB_CD54	LAPTM5	FILIP1L	SLCO5A1	IGKV3OR2-268	ITGA6	HCST	PTGES3	ARPC1B	PLCH1	CD8B	ANKRD55	PTMA	PTP4A1	LINC02341	CCL5	CRIP2	RPS9	DEPDC1	CDCA7	ITGB2	UBE2L6	MELK	GAPDH	VDAC1	TNIP3	CHST4	TUBB2A	TNC	RGS18	LST1	LINC02397	APOE	CRTAC1	IGHM	GABARAPL1
	VIM	FEZ1	ST6GALNAC1	CD7	NRIP3	AB_CD109	YBX3	HPGD	AB_CD45RB	AIF1	LRRC32	ABCB1	PDE4B	AB_CD314	TNS3	CLDN1	FAIM2	MIR181A1HG	TMEM123	EMP3	ANKRD37	SUB1	SMC4	CORO1A	RGS1	AB_CD11c	TSPYL1	NTRK1	RASGEF1B	TIMP1	RPL5	NUF2	EXO1	FGR	IFI27	KNL1	LSP1	MRTO4	CD86	PRDM8	IDS	SOX1-OT	AB_CD36	AB_CD328	CCDC103	THBS2	STRA6	IGHV1-69D	H3F3B
	ERN1	GNLY	AB_CD4-1	AB_CD328	TNFRSF19	VIM	GZMB	TMIGD2	RUNX2	SNHG29	CD27	KLRG1	CYB561	HLA-DPA1	CXCL13	CA8	KCNJ2	AB_CD28	TAGLN2	SIT1	RGS2	CLDND1	NAT8L	HOPX	CXCR4	RPL14	RGCC	TYMP	CD69	ANXA5	RPL11	AURKA	MCM6	S100A4	DDX60	CDCA2	TESC	ATP5MC3	ZBTB32	ETV1	UCP2	AB_CD38-1	PTCRA	FTL	MARCH1	MEG3	GYPB	IGHV3-74	MAFF
	CHGB	CD247	PPP1CC	SPRY2	S100P	NSG1	IFITM2	LIMS1	AB_CD101	RPL5	AB_TIGIT	GPR65	PARP8	CTSW	ZNRF1	HAL	PTHLH	IL10	TRABD2A	TPM3	DUSP1	ADA	HHIP-AS1	LGALS1	PIK3IP1	AB_Notch-1	EIF4A3	RANBP1	AB_CD11a	IL32	RPL34	CCNA2	ORC6	TGFBR3	LGALS9	C2orf48	AB_CD71	ATP5F1B	SLC1A4	LYST	AB_CD44-2	BCL3	CLEC1B	CPVL	BLK	TAGLN	TRIM10	IGLV1-47	LEPROTL1
	AB_CD95	CST7	TCF7	PRSS57	RYR2	ZFP36L1	PECAM1	PRR5	CD55	AB_CD3-2	MIR4435-2HG	TSPAN15	CD2	APMAP	VSTM2L	TOX	LINC02389	CD86	LEF1	COX8A	NUDC	MYL6	IKZF2	PYCARD	ERN1	AB_CD39	PRMT9	HSD11B1	ATF3	WDR86-AS1	RPL7	BUB1	PAQR4	ITGAM	TRIM22	STMN1	AB_CD29	PRMT1	FXYD2	PACSIN1	PBXIP1	SYNGR4	ACRBP	HLA-DRA	FCER2	AB_CD34	KBTBD12	IGHV1-46	FAM46C
	SEC61B	CTSW	ITGA4	B3GNT7	IL1RL1	RORA	HCST	AB_Integrin-7	TRABD2A	AB_abTCR	CCDC141	CXXC5	ITGA1	HCST	TMEM173	TCF7	DFNA5	LGALS3	TMEM156	CALM1	HSPE1-MOB4	CNN2	AB_CD305	ANXA5	KLF6	RPS27A	CREM	COL9A2	AB_CD244	CD82	RPL30	DEPDC1B	TUBA1B	ADRB2	SAMD9	KIF11	AB_CD86	TXN	IGFLR1	SLN	LDLR	TMSB10	AB_CLEC2	SAT1	AB_CD272	COL6A3	PHOSPHO1	IGHV3-64	SC5D
	SNED1	AB_CD161	CPM	AOAH	ATP1A4	ADAM23	LGALS3	FURIN	TXK	RPL35A	CARD16	CCR6	ANXA1	SLAMF7	CEBPB	PPP1CC	C1orf228	UCP2	GREM2	CD3D	CCT4	SLC25A3	AB_CD27-1	ITGA1	TMEM173	AB_Galectin-9	NAF1	GRINA	AB_CD49d	LMO4	RPSA	CDCA2	C16orf59	CCL5	LAP3	HIST1H2AL	ITGB1	CCT3	ACP5	FGFR1	AAED1	TUBB6	CXCL5	G0S2	ADAM28	AB_CD90	HBZ	IGHV4-4	GRASP
	GLIPR1	AB_gdTCR	RILPL2	IFITM2	KCNMA1	NPDC1	KRT81	AB_CD86	MT3	RPL19	SHMT2	MYBL1	AB_CD109	TIGIT	IL10	PTPN13	CNKSR3	CDKN2A	IFNGR2	CORO1B	NEU1	DECR1	CD7	APOBEC3G	ADAM23	AB_CD199	SERTAD1	ACTB	SDCBP	CD99	RPL15	STMN1	RAD51AP1	FLNA	GBP4	CDCA3	PTTG1	PYCR1	APOBEC3C	NPBWR1	YWHAQ	LGALS1	AB_CD9	FGL2	EBF1	C1R	C14orf105	IGKV1-17	PIM3
	AB_CD127	CD160	NPDC1	AB_CD94	TNFRSF11A	YWHAH	ALOX5AP	S100A4	CPNE2	PABPC1	TNFRSF18	AB_CD150	ATP1B1	AB_CD307c	LINC01480	MME	CHGB	AB_CD86	TXK	LGALS1	ATF3	GBP1	CHI3L2	IL32	LINC00892	ZFP36L2	DDIT4	NME1	NR4A1	B2M	RPL8	CKAP2L	DSCC1	LILRB1	SP100	SPC24	CCL5	SNRPG	DUSP4	PALM2-AKAP2	SEPT11	PARAL1	AB_CD110	IFITM3	MACROD2	NNMT	HTR3E-AS1	IGKV2-28	FOS
	AB_CD48	TRGV11	PPP2R5C	TRGC2	C13orf42	CR1	GABARAPL1	LTK	RGS10	IL6ST	SAT1	AB_CD196	LINC01943	TNIP3	S100A11	SMPDL3A	AHI1	CD70	TAB2	IFITM2	HSPA4	CD38	DPPA4	GBP2	RIPK2	AB_CD319	SRSF7	PPA1	AB_CD11b-1	GSTK1	RPL6	CDK1	ORC1	AB_CX3CR1	IFIH1	TUBA1B	IFNG	SERBP1	ANXA5	ACTG1	FAM107B	CRYBG1	TAL1	CD68	LY86	TNXB	IFI27	IGHV3-11	NFKBIA
	BIRC3	MATK	PDCD1	SOST	RBPMS	BHLHE40	TMSB4X	FUT7	GYPC	RPS5	TSHR	IFNGR1	AB_CD26	HLA-A	FURIN	CAV1	FBLN7	LGR4	REXO2	ATP5E	TNFSF14	PSMA4	RTKN2	AB_CD366	TP53INP1	RPL36AL	ZFP36	AHSP	BCL2A1	TSPO	RPS7	NUSAP1	CDCA5	LITAF	IFI16	MND1	IDH2	SLIRP	IL10	LGALS9C	ANKRD28	CCNE1	SEPTIN5	GRN	AB_CD19	MYL9	AB_CD35	IGHA2	EZR
	TNFRSF11A	AB_CD305	LY96	TRG-AS1	FANK1	COL5A3	CTSD	AIRE	PCSK1N	SCML1	LINC02195	AQP3	MYBL1	LYAR	RBPJ	ASCL2	IL21	CREG2	PCGF5	CD52	PPP1R15A	CDCA7	BICC1	MYL6B	CCNH	RPS10	SBDS	CCR8	ID2	PRDX1	RPL12	TUBA1B	RAD51	CD8A	TNFSF10	CCNA2	APOBEC3G	NME2	CD3D	BRD7	ZFP36	S100A6	AB_mouseCD49f	NCF2	LINC01857	FSTL1	SLC25A39	IGLV3-19	TUBA4A
	AB_CD44-1	AB_CD42b	AB_CD4-2	IL2RB	PLA2G16	LTK	GOLIM4	AB_CD152	MAGI2-AS3	MAL	IKZF4	LINC01871	AB_CD195	SAMD3	MYL6	ANKRD55	KIAA1324	S100A6	ARL6IP5	ARPC4	TSPYL2	MT-CO3	MYOM2	LIMD2	INPP4B	ITM2B	CCNH	SEC11C	AB_CD18	CCR8	RPS19	HMGB3	CENPM	CD52	PALM2AKAP2	RAD51AP1	PSMB8	PHB	FLT1	AB_CD200	EMP3	PDLIM4	ALOX12	CFD	PLD4	SERPING1	GMPR	IGHV1-2	PFKFB3
	ADAM19	NCR3	ICOS	HOPX	AB_CD294	SASH1	DAPK2	GOLIM4	AB_CD7	RPL29	TNFRSF9	ERN1	TIMP1	FYN	CTHRC1	ADD3	TNFSF11	E2F2	FLT3LG	ENO1	PLIN2	PSMB8	MIR181A1HG	IDH2	RESF1	RPS15	FOS	TNFRSF9	PTGER4	AB_CD226-2	RPL29	TTK	ESCO2	AB_CD43	HERC6	KIF2C	NIBAN1	NPM3	CTSB	ZNF704	YWHAZ	LINC01235	EGF	AB_CD88	GAPT	CCDC80	RHAG	IGLV3-10	RGS1
	CD82	AB_CD314	TP53INP1	IGFBP7	IL32	OSM	ID2	MSC	PDE3B	C1orf228	GBP2	AB_CD56-1	AB_CD103	RARRES3	TNFRSF4	PDCD1	ZCCHC12	SRGN	MYC	MYL12B	CLK1	NOSIP	LINC01953	AB_CD29	PTGER4	AB_CD34	ZFP36L2	HMSD	DUSP6	AB_CD101	RPL35A	KNL1	MND1	TBX21	DDX58	PCLAF	LINC02694	PA2G4	SNX9	AB_CD31	TUBB4B	KIF26A	LINC01151	AB_CD11c	SSPN	COMP	H2AC21	IGKV1-39	CDKN1A
	PLP2	NKG7	CXCR5	LYN	BHLHE40-AS1	AUTS2	CKLF	ANXA5	AB_CD27-1	RPS12	CCR8	SYTL2	CFH	FCRL6	ALOX5AP	FAM107B	TIAM1	AB_CD95	ITGA4	PSMA7	NKRF	CLTA	FAT1	MT1E	ARID5B	RPS27	MYADM	C11orf86	NEU1	FXYD5	RPS27	KIF15	CHAF1A	AB_CD244	PARP14	SKA3	BCAT1	PSMA7	RAB27A	SH2D1A	TXN	ZFP36	MYLK	MT-ND1	AB_CD20	FBLN1	LIFR-AS1	IGHV3-21	SELENOK
	KRTAP5-2	AB_TIM4	HINT1	CMC1	MBOAT2	ELOVL4	CTSA	GDE1	PADI4	RPL34	BIRC3	AB_CD54	PLCB1	CCL4	GABPB1	TSHR	SESN3	CTSH	CITED4	ATP5F1E	JUN	ATP5F1C	SPRY2	ACTG1	FXYD5	RPL36	DNAJB9	PDIA6	IER3	NIBAN1	RPLP2	HJURP	TCF19	AB_CD226-2	SP110	FBXO5	PDLIM1	PRDX3	GNB4	QPRT	FOSB	BATF3	TRIM58	MARCKS	IRF8	COL6A2	EIPR1-IT1	IGHV3-15	TSPYL2
	TIMP1	CCL5	TMSB10	PRDM16	AB_CD49d	AB_CD4-2	ITGAX	ACTG1	NRCAM	RPL9	TNFRSF4	RORA	PERP	CHI3L2	ANKRD35	CXXC5	CHN1	CACYBP	OXNAD1	PPIB	CGAS	GIMAP4	ZNF683	AB_CD8	RNF19A	AB_CD72	PTGER4	RELB	REL	AB_CD44-1	RPL27	KIFC1	RAD54L	ZNF683	PSMB9	TK1	ADA	NDUFAB1	CD7	TACSTD2	C16orf54	TOB1	ABCC3	ATP2B1-AS1	BTK	SFRP4	GATA1	IGLV4-69	IDI1
	INPP4B	AB_CD9	GMFG	CXXC5	BFSP2	AB_CD150	C9orf142	CPNE7	KLRK1	RPS25	FCRL3	RBM24	ID2	AB_CD11a	CD3D	CD200	PDCD1	ZC2HC1A	PDE4B	APOBEC3G	LINC02731	H3F3A	TRGC2	DOCK5	AREG	AB_CD102	FOSB	ATP5G1	CYTOR	DSTN	RPS13	KPNA2	AB_CD71	GZMM	HELZ2	ZWINT	EZH2	HSPA8	PGAM1	PTK7	CA5B	KCNK7	SYTL4	MT-CO2	CLEC4C	SYT8	YBX3	IGKV2-4	NR4A3
	ADAM23	MAP3K8	MARCKSL1	AB_CD11c	MGLL	AB_CD49d	LDLRAD4	STON2	NDFIP1	AB_CD45RA	GLRX	JAML	DPP4	AB_CD31	TYMP	NUDT16	ZBED2	NEAT1	PIM2	CISD3	DYNLL1	CXCR3	PRL	PSMA4	ZBTB16	TSC22D3	DDX5	TNIP2	AB_CD29	TSPAN2	RPS11	PRR11	CCNE2	GZMA	TYMP	HIST1H3D	ARHGDIB	NOP16	ADTRP	AB_CD28	KLF2	MPO	HIST1H2AC	MPEG1	FAM177B	C7	LRRC3-DT	IGHV1-24	TMEM2
	ITGB1	AB_CD244	TRADD	PRF1	C15orf53	AB_CD226-2	AB_CD48	IL1R1	OXNAD1	RPS14	HLA-A	IL18R1	SAMD3	HLA-B	ARL3	KIAA1324	TPD52L1	PMVK	SLFN12L	CAPZB	SLC5A3	TXNDC17	MARCKSL1	PRF1	CYSLTR1	RPL24	PNRC1	GAPDH	NLRP3	TNFSF10	RPL27A	NCAPG	RMI2	HOPX	SPATS2L	CDCA8	ALOX5AP	DDX21	GZMK	OGN	DUSP1	GDNF-AS1	CD9	MAFB	TNFRSF13B	AB_CD163	AB_CD59	IGHG2	FAM177A1
	TNFRSF18	TRDJ1	AB_CD52	KIR3DL3	TTLL10	AB_CD4-1	KLRC3	AB_CD196	A1BG	RPL13	BATF	AB_CD127	SESN1	CD81	CTSD	AFF3	TOX	IKZF3	ENO1	SDF2L1	CCDC117	PPP1CA	P2RY1	PLS3	GPR171	RPL11	IRS2	PRDX1	BHLHE40	LINC02762	RPL37A	CKS2	E2F8	HLA-B	DDX60L	SKA1	TMSB10	PDCD5	GTPBP8	CRYM	CSRNP1	UNC80	PVALB	AB_CD58	AFF3	ISLR	DCAF12	IGLC1	PABPC1
	FXYD1	DUSP2	FKBP5	AB_CD43	ZC2HC1A	DPP4	ITGAE	LMO4	CRTAM	AB_CD4-2	H3-3A	P2RY14	GIMAP7	B2M	NFIL3	HEYL	AZIN1-AS1	RGS6	ADGRE5	CYBA	PHYH	AB_CD28	AB_CD31	DYNLL1	GLIPR1	CD48	ALG13	CCND1	AB_CD2	MYL12A	RPL39	CKS1B	TEDC2	ITGB1	MT2A	BUB1B	CDKN2A	RPLP0	TNFRSF9	MYL6B	S100A6	SCN9A	SPX	CXCL8	RALGPS2	RARRES2	C8orf4	IGHV2-5	PER1
	ZFP36L2	IL12RB2	TAGLN2	TRGV8	MRC1	KIF5C	CD96	AB_CD38-1	FBXO32	RPL18	AB_CD27-2	AB_CD48	IGLV2-14	LITAF	NUDT16	CDK14	MAGEH1	TRIB1	N4BP2	PPIA	NABP1	MRPL10	MALRD1	KLRC1	KIAA1551	KLF2	NR4A3	PFN1	SRGN	CALM1	RPS28	CENPW	WDR34	KLRG1	DRAP1	POLQ	B2M	CCT8	GBP2	DTHD1	PLP2	SLCO4A1	CA2	PLBD1	SIGLEC6	C8orf4	TMEM133	IGKV1-27	DUSP1
	FAM129A	AB_CD270	OPTN	TTC38	AB_CD95	AB_CD161	DOCK5	UCP2	TCF7	RPL37	IL10RA	ID2	CXCR4	HLA-C	GLDC	CORO1B	NTRK3	S100A4	MYL12A	PKM	H3F3B	EZH2	FBXO16	LINC01871	FBXO32	AB_CD223	TENT5C	CD80	TNFSF14	CLIC1	RPS10	TUBB	NASP	CLIC3	RNF213	KIF4A	PMAIP1	MRPL4	GLDC	SEPT6	RARA	GRASP	C2orf88	AB_TIM4	HTR3A	NDUFA4L2	C1orf226	IGHV3-72	SARAF
	TEX15	GZMM	ARMH1	CD160	ADCY1	AB_CD95	NCR3	LZTFL1	PRCD	EEF1B2	LAIR2	PHACTR2	GPR171	APOBEC3G	LINC01871	C1orf228	PPP1CC	IRF4	LPAR6	ANXA6	CKS2	ATP5F1B	IQCA1	APOBEC3B	PTPN13	AB_CD61	DDIT3	PSME2	EDARADD	IFITM2	UBA52	CDC25C	CDC25A	HCST	IFIT5	H2AFX	AB_CD39	HSP90AA1	SERP2	TCN1	LINC01578	SEPTIN4-AS1	ABLIM3	AB_CD36	WDFY4	FBN1	SOX6	IGHGP	METRNL
	GPR183	AB_CD45-1	AB_CD5	AKAP5	CSF2	IL1R1	ADRB1	CXCR6	AB_CD31	NOG	USP15	B3GALT2	MT-ND2	PYHIN1	GNA15	FKBP5	FZD3	FURIN	NBDY	S100A11	C17orf67	SEM1	IGF2BP2	CD74	LPAR6	RPS28	SRGN	VDAC1	ICOS	MGST3	RPLP0	KIF11	GMNN	CD99	PSME2	SHCBP1	AB_CD101	GPATCH4	CTAG2	CHI3L2	TPPP	CCDC27	AB_CD93	CLEC7A	SCIMP	NUPR1	NFE2	IGLV6-57	SRSF7
	AB_CD226-2	AB_CD122	RNF19A	CD300A	PDLIM5	RUNX2	AB_CD314	LINC01106	ABLIM1	RPS6	TRIB1	KISS1	EMB	LINC02084	GSTA4	ACTN1	TOX2	CXCR6	IGFBP3	PRELID1	MXD1	ARPC2	AB_CD52	CD27	FBLN7	AB_CD30	UBE2S	EIF5A	EVI2A	AB_mouseCD49f	RPL37	HMGN2	ATAD2	TPST2	C19orf66	KIF18B	CD52	MRPL12	CD247	ISG20	RPGR	DIP2A-IT1	SMOX	IGSF6	CYBB	PLAC9	AB_CD55	IGKV1-6	PDE4D
	SUSD4	AB_CD13	H2AFZ	AB_CD337	BCAT1	TRIQK	NBL1	WSCD2	APBA2	TMIGD2	SEMA3G	GYG1	AB_CD226-2	YBX3	ATP8B4	MCTP1	NFATC1	LAPTM5	DOCK10	DBI	EIF5	AB_CD39	LEF1	AB_CD279	NLRP3	AB_CD83	GPR183	BATF	H3F3B	AB_CD95	RPS21	TUBA1C	E2F2	SAMD3	TAP1	ASF1B	PSME1	CCT7	MCTP2	TIGIT	CCDC167	RBM38	RBPMS2	NAMPT	FCRL4	TIMP1	DMTN	IGHV3-53	CEMIP2
	PPIB	AB_CD11b-1	LTB	XCL2	AB_CD305	S100A11	SLA2	AB_CD279	DBN1	SOCS3	CEACAM4	CCL3L3	RPL36AL	HLA-DRB1	LRRC28	CXCL13	PTF1A	AB_CD71	SH3BP5	ANXA2	SQSTM1	ATP5MG	RPS24	SUB1	IKZF1	AB_CD56-1	TUBB2A	IGFL2	ARL5B	DUSP4	RPS15	SGO2	SMC2	FAM65B	DTX3L	ASPM	PSME2	TRAP1	CARHSP1	NREP	MLF1	RBAKDN	GMPR	AB_c_Met	HLA-DOB	SOD3	SPTB	IGHV3-48	SOCS1
	CTSA	AB_CD199	AP3M2	TRDV3	GADD45G	LIMS1	S100A4	AB_CD70	SATB1	ABLIM1	LGALS3	IL17RE	GZMA	PDLIM1	ANKRD28	SERTAD4	CDK14	AES	TMSB10	VASP	LRIF1	ATP5F1A	AB_CD93	APOBEC3C	BATF	RPL32	ODC1	SORD	IL21	FAM129A	RPS20	SMC4	DMC1	TRGC2	HSH2D	HIST1H2AI	ATP5MC2	SDF2L1	CD82	FCMR	EIF1	PIWIL1	TRAPPC3L	PSAP	GPM6A	AB_Folate	NPRL3	IGKV1-16	RNF125
	ANXA1	AKR1C3	CD4	AB_CD122	AB_CD25	TMEM273	SPRY1	ZNRF1	SNHG29	NACA	FCMR	CCL20	ANTXR2	PTGDR	GOLIM4	THADA	CNIH1	NDUFV2	IL4R	PSME1	CCT3	ARPC5	AB_CD9	MRPL10	MFHAS1	AB_CD154	RANBP2	PIM3	TNFRSF9	TRADD	RPS29	FOXM1	CENPW	PLAC8	STAT2	MYBL2	ARPC3	ATP5G1	PKM	PECAM1	AB_CD171	LINC02774	FAXDC2	FPR1	SYK	TM4SF1	ESRG	IGHV1-69	SBDS
	ARHGAP15	AB_CD46	AB_CD38-1	PIK3AP1	SCART1	NFKBIA	CXCR3	AB_CD39	TSPAN32	AB_CD45RB	IL1R2	PRR5	PIM1	PTPRC	CTSB	SLC9A9	AB_CD279	IL1R2	PLPP1	ATP5G3	JUND	APOBEC3H	FAM30A	GZMK	PLIN2	AB_CD20	HNRNPA0	CALR	PHLDA1	TMSB4X	RPS25	CIT	RBBP8	CTSC	IFITM3	TPX2	GMFG	APRT	PPIB	AB_CD27-1	LGALS1	GADD45A	TUBA8	APLP2	TLR10	SERPINF1	CDR1	IGKV2D-28	RNF19A
	TRADD	AB_CD195	H3-3A	CCL3	ITM2C	FKBP11	PGK1	S1PR4	PIK3IP1	BEX3	PELI1	GZMK	S100A11	AB_CD18	DUSP4	SERPINE2	PDE7B	H3F3A	LINC00861	ZYX	MUC12	ABRACL	AB_CD35	CLIC1	TRAT1	RPL35A	VPS37B	CUL9	HOPX	LPAR6	RPL35	ARL6IP1	DEK	GPR141	GBP5	HIST1H1C	TXN	TOMM40	GALM	AB_TIGIT	IFFO2	ALYREF	MMRN1	APOBEC3A	POU2AF1	GNG11	C10orf11	IGKV3D-20	RGS2
	SELL	AB_Notch-1	LIMS2	AB_CD56-2	PRKG1	TSPAN15	TRGC2	NDUFV2	BACH2	MYC	PBXIP1	TRIQK	PRDM1	TNFRSF9	C10orf67	SGCE	TSHZ2	ADTRP	MAPKAPK3	VIM	TRA2B	MRPL28	ZNF99	ATP5F1B	GLUL	AB_CD31	SOCS3	ARPC1B	IFIT3	GLUL	RPL41	SHCBP1	ATAD5	LAIR2	PHF11	ESPL1	AB_CD18	SNHG16	CTLA4	CLDND1	UBC	SLC30A2	MYL4	AB_TauPhospho_Thr181	FAM30A	HSPG2	AB_CD58	IGLV2-23	ELL2
	TLCD2	ALOX5AP	PHACTR2	GZMB	PHTF2	CHN1	DBN1	LGR4	FBLN2	AB_CD3-1	IL1R1	SCRN1	DKK3	HLA-DQA1	PHEX	PASK	SMCO4	GBP2	RIPOR2	CHCHD2	SAT1	F5	ARHGAP42	COX5A	CCR6	RPL39	ZFAND5	LMCD1	CD160	MYL6	RPL22	SGO1	TMEM106C	ARPC2	RTP4	HIST1H1D	NPDC1	TCP1	CD74	GPR183	IVNS1ABP	PPP1R3G	ESAM	SLC11A1	BSN-DT	COL14A1	KLF1	IGKV3D-11	RUNX3
	AB_CD25	AB_CD354	TRAC	AB_CD7	PTGER3	ANK1	PTMS	LGALS3	PHGDH	RPS28	CLNK	FKBP11	S100A10	KLRD1	NDUFV2	TIGIT	KCNJ6	GDE1	GPRIN3	RHOA	KLF6	ATP5MC3	MEF2C	LGALS3	CITED2	AB_CD185	BTG2	FSTL3	RNF19A	CCR4	NACA	TUBB4B	TIMELESS	CYBA	PNPT1	MXD3	CIITA	PSMA5	HLA-A	MPP1	FTH1	MAFF	ELOVL7	LILRB2	SYT1	POSTN	FAM210B	IGLV2-11	NFE2L2
	P4HB	AB_CD61	GIMAP4	GOLIM4	IL4	HSD11B1	PARP8	FAM126A	CD27	PIK3IP1	LMCD1	HPGD	NELL2	CCL4L2	B2M	HIF1A	LINC02341	F5	GLUL	GLIPR2	BCAS2	COX5A	STARD4-AS1	CTLA4	RNASET2	VIM	IDS	NFKB2	NFKBIA	ANXA6	RPL4	PBK	H2AFZ	VCL	ADAR	HIST1H3C	ATP5G2	HNRNPAB	CD70	AB_CD27-2	GATA3	LINC01393	TFPI	AB_Podoplanin	PPP1R14A	ITGBL1	GGT6	IGKV1D-8	MAP3K8
	TESPA1	XCL2	CD3D	NKG7	SLAMF1	TNFRSF25	AOAH	AB_CD49d	CD8B2	RPS15A	AB_CD71	COL5A3	ERN1	PLAAT4	HOPX	FAM134B	MYH6	CCR5	ETS1	FKBP1A	CSF1	LIMD2	PRKAR2B	PSMB8	CYTIP	JUNB	SNHG15	TTBK1	ZEB2	PKM	RPL24	PSRC1	CTNNAL1	SLC1A7	NT5C3A	E2F7	ACTG1	AB_CD71	SUB1	TTN	CCDC173	PIM3	MMP1	MT-ND4L	TBC1D9	OLFM4	TMEM56	IGHV4-31	TIPARP
	FRY	AB_CD85g	TOX	RHOC	C19orf33	AFDN	LINC02195	CA2	CD7	SESN3	CYTOR	SPOCK2	MT-ND1	F2R	GBP2	IGFBP4	CPA5	FUT7	GPR171	COX6C	PLAAT4	CALM3	TCF7	AB_CD278	ELF1	RPL38	SOCS1	UCP2	SLC1A5	AB_CD58	RPL14	SAPCD2	POLE2	BIN2	PPM1K	CDC25C	CORO1A	CYC1	PARK7	UNC5B-AS1	S100A4	PRKCDBP	GNAZ	CD36	PCDH9	WISP2	MMP16	IGLL5	SYAP1
	IL10RA	AB_CD110	ZC2HC1A	SYNGR1	SEC61B	TTC39C	GLIPR2	NEAT1	ATM	EEF1A1	MAGEH1	KIT	LINC01871	CTSC	CD109	PTPN11	TIGIT	CYTOR	STT3B	PRDX1	CDC42EP3	BTF3	GPC6	SH3BGRL3	IPCEF1	RPS25	FAM177A1	ZG16B	IRF8	PFKL	RPL28	H2AFZ	WDR76	CD3G	ETV7	HIST1H2AM	AB_CD49b	CACYBP	CHST12	AB_CD81	PGM2L1	HES5	CTTN	FTH1	DIRAS1	CCL26	IZUMO1	IGKV3-7	GADD45B
	CCR8	MYOM2	TLK1	CD244	HLF	GPR25	TMIGD2	MRPL10	AB_CD305	FOXP1	DUSP10	B3GNT8	TPRG1	PIK3R1	CD2	CKAP4	MEST	TNIP3	MLLT3	ITGB2	SLBP	CCR5	TRG-AS1	MIR181A1HG	SESN1	AB_Podoplanin	LYPD3	PARK7	CD70	RCBTB2	RPL36	KNSTRN	H2AZ1	CD320	SHFL	NCAPH	ATP5L	AHCY	CCL3	DOK5	ARL4C	ATP2A1-AS1	HBG2	TNFSF13B	UBE2F-SCLY	COL12A1	BLVRB	AB_CD11b-1	USP36
	SEC11C	SH2D2A	CNN2	TRGV7	TRPM6	RPLP0	ABCB1	ARHGDIB	PRMT2	EIF3E	CPNE2	RUNX2	GBP4	CLEC2B	IL26	TIAM1	SOD1	SUB1	IGF1R	FERMT3	TAGAP	RPS24	ZNF711	SERPINB1	CTSB	RPS26	USP36	EPOP	OASL	GAPDH	RPL36A	HN1	FANCI	PALLD	ZBP1	FOXM1	AB_CD70	PSME2	TP63	TMSB4X	GLUD1	AB_CD86	AB_TIM4	AB_CD155	BASP1	COL6A1	PLCB4	IGHV2-70	RBM38
	S100A11	AB_CD235a	CD84	SIGLEC7	GAB2	SESN1	GZMA	LINC02384	SFRP5	PRKCQ-AS1	CCNG2	AB_CD205	GLIPR1	AB_CD279	PGAM1	SYT17	CTHRC1	BAK1	PDK1	PSMB3	LDLR	CFL1	CLEC11A	PSMB10	TTC39C-AS1	RPL9	YWHAZ	GRSF1	TSC22D2	MYO1G	RPL38	UBE2S	SLBP	PATL2	IRF9	FANCI	JPT1	HMGA1	AFAP1L2	AB_CD45RA	FAM129A	AB_CD98	CALD1	C5AR1	LINC00494	SCGN	C5orf42	DERL3	ATG2A
	GPR171	AB_CD172a	GSTK1	FAM49A	ITGA1	ERN1	EVL	AB_CD103	RPS4Y1	SARAF	AB_CD164	KIF5C	GIMAP4	VCAM1	CAMK1	SEPT6	BMERB1	AB_CD195	MYB	ATP5L	USPL1	IDH2	VANGL2	NEAT1	PIM2	AB_CD243	ETV3	CSF2	IRF4	YWHAQ	FAU	H4C3	BRCA2	APMAP	PSMB8	FAM111B	SH3BGRL3	TIMM10	COTL1	DENND2D	LINC-PINT	LINC00641	MAP3K7CL	XIST	SWAP70	AQP1	FAM245A	IGKV2-30	DDX21
	CADM1	PTMS	TRBC1	CST7	PNMT	KDSR	CAPN12	NR1D1	FAM173A	RPL39	ANKS1B	CTSH	FTL	ARPC5L	CYBA	LRRC8D	CAV1	CDH17	IL2RA	APOBEC3C	CDKN2C	PYCARD	CCNJL	ADA	KLF9	AB_CD47	CD55	ATP5MC1	AB_CD81	MYL12B	RACK1	PRC1	HMGB2	HLA-DPB1	APOL6	BIRC5	CD99	ODC1	FABP5	BTNL9	CALM1	LINC00691	MEIS1	CEBPD	TNFRSF13C	MFAP5	EIF2S3L	AB_CD138-2	RGCC
	CYSLTR1	HCST	ITGB1	TIGIT	CISD2	CTSA	IL2RB	MIR181A1HG	LINC01138	RPL18A	SELL	AB_CD328	CDC42EP3	TOX	TP63	CDH2	SLC28A3	C12orf75	UGCG	JPT1	RHOB	RGS10	AB_CD11b-1	CEBPD	CXCR5	RPL28	SRSF5	MRTO4	PNRC1	FLNA	RPL17	JPT1	GGH	YWHAQ	CHMP5	HIST2H2AC	RARRES3	CALR	HLA-DMA	ANTXR2	HSPA8	FAM230J	H3C10	MT-CO3	PHACTR1	MT-ND4	RUNDC3A	IGHV4-61	NAMPT
	AB_CD29	TRBC1	CD28	AB_TIGIT	FAM124B	FRMD4B	SCUBE1	PROK2	MEST	ANKRD55	SAMHD1	S100A4	AB_CD29	TRGC2	HLA-A	C9orf16	KIAA1217	GALM	RCAN3	PDIA6	GPBP1	LIMS1	SCN9A	CCR1	PFKFB3	RPS3	SYAP1	MYL6	RHOH	SEPTIN11	RPL23	KIF18B	RFC4	LGALS1	NMI	RAD54L	FAM129A	ATP5G3	SYNGR2	SPTBN1	CD99	LITAF	HBE1	EREG	LINC01781	MFAP4	XK	IGHV3-49	SAMSN1
	AB_CD52	CD7	LAT	TRGV4	DUSP6	AB_CD82	AB_CD11c	TK1	HLA-DOA	RPS27A	TOX	CCR2	CEBPB	MATK	VDR	NCALD	HSD11B1	OSTF1	ANK3	SERF2	PARD6G-AS1	AP2S1	AB_gdTCR	BHLHE40	TENT5C	AB_CD45-1	ZBTB1	SH2D2A	PRNP	CCDC167	RPS24	MXD3	RRM1	KLRF1	B2M	UBE2T	HMGB1	SLC25A5	SCAMP2	CAPG	DYNLL1	HIST1H1A	SMIM5	AB_CD235a	GNG7	TMEM196	POTEG	AB_CD15	PTP4A1
	NR3C1	AB_CD193	TPR	FGR	HPGD	FURIN	CXCR6	TPM4	LDLRAP1	LINC00402	TNFRSF13B	ELOVL4	PDCD4	PLA2G16	DPF3	ADTRP	MRC1	IQGAP2	ARHGAP5	LCK	CCT2	NDUFB3	DOK7	CD9	CELF2	AB_Rag-IgG2c	PABPC1	CPA4	LTA	GLIPR2	TOMM7	SPC25	DIAPH3	EMP3	PLAAT4	FBXO43	ATP5MG	PRELID1	CDK2AP2	CNN2	C14orf80	H2AFV	AB_CD226-1	HCK	IGHG2	COL5A2	IGF2BP2	IGKV2-29	LITAF
	AKAP12	DTHD1	PGM2L1	METRNL	IL2	AB_CD102	ATP5E	BIRC5	PCED1B	RPL14	UGP2	RAB6B	HLA-E	AB_CD195	IFITM2	SH2D1A	CTTN	C1orf112	NFKB1	UBL5	ANXA1	NOP10	BAZ2B	ACOT7	HNRNPLL	RPL21	SFPQ	CXCL13	CSRNP1	PLEC	RPL31	SPC24	WDHD1	AB_CD8	SAT1	HIST1H2BH	JAKMIP1	TXNDC17	LRRC28	PTPRG	CAST	FOSL2	H2AC6	CCL7	DENND5B	AEBP1	LINC01374	IGHV3-43	PPP1CB
	IL17RB	CEBPD	F5	TKTL1	GPR25	AB_CD29	IL32	SPOCK2	NSG1	GIMAP7	CCR4	LTB	HLA-B	HLA-DQA2	S100A4	APBB2	BCAT1	PBXIP1	MBNL1	ATP5J2	BTG3	ATP5PB	PXDN	ARPC3	PHTF2	TOMM7	IRF2BP2	REL	RHOB	JPT1	EEF1D	ANLN	LIG1	DSTN	IFITM2	STIL	CPNE2	SNRPD1	ENTPD1	PHLDA1	ODC1	HMGB3	SPOCD1	AB_CD137L	PNOC	AB_EGFR	CEACAM8	IGKV2-24	PTMA
	CD200R1	PRF1	LIMD2	IFITM3	CCR9	GREM2	CLIC1	ITPKA	CFAP97D2	ITGA6	ISG20	FEZ1	AB_CD45RO	TNFSF9	SERF2	TPD52L1	GSDME	LGALS1	RASSF6	PSMB9	EIF4A2	TPM4	FCGRT	MPST	RSBN1	RPS29	YME1L1	COX17	ANKRD28	EEPD1	PFDN5	RACGAP1	CENPH	MYO1F	PARP10	NEIL3	MYL6	ATP5MC1	WARS	LGALS9B	SRGN	H2AFB1	ANXA3	LGALS2	SCN4A	MALAT1	LRRC4B	IGLV1-36	KDM6B
	SSR4	GABARAPL1	PVT1	PDLIM1	RPLP1	ELK3	PRSS38	ARL3	KLRC4	RPL7	FAS	CCR1	SAMSN1	ZBTB38	GDE1	XXYLT1-AS2	DAZL	MYL6	ISM1	NDUFB3	SOD2	CARHSP1	PLAC8	NKG7	TBXAS1	AB_CD205	TSPYL2	TXN	FAM53C	C15orf53	EIF3E	ECT2	DNAJC9	MYL12A	PARP12	CENPM	LINC00176	ATIC	CKAP2L	LRMP	PRXL2C	MYBL2	THBS1	RETN	ABCB4	DPT	C22orf29	IGHV1-3	SLC7A5
	AB_CD275-2	AB_CD301	PFN1	DRAXIN	PDCD4	NCF4	GSTP1	FSD1	TGFBR2	PASK	PRDM1	ADRB2	SYNM	RAB27A	CKLF	SMAP2	XXYLT1-AS2	DUSP6	DDX21	SUB1	AZIN1	AB_CD279	TOX	ATP5MC2	C1orf162	AB_CD46	HSP90AB1	CCND2	CKS2	SEPT10	RPS17	ARHGAP11A	TUBB	CALM1	HLA-E	DLGAP5	PALM2-AKAP2	HSPA5	IL2RG	GDF10	CDC42	CEMIP2	PGRMC1	AB_CD106	CD180	COL4A1	ADIPOR1	AB_CD207	ZBTB1
	GSTK1	PIK3AP1	MYL6B	HAVCR2	ERN1	JAML	SPINK2	KIF18B	RPL28	TCEA3	ARG1	S100A6	TMX4	HLA-DMA	SH2D2A	FAAH2	C9orf16	ARPC1B	SATB1	NDUFA4	TAF7	S100P	SLC25A5	GBP5	PDCD1	AB_CD274	ATP1B3	PDLIM4	NFKBIZ	GLIPR1	BTF3	AB_CD71	DNMT1	IFITM2	BISPR	EZH2	HMGB2	NOLC1	PRDM1	GNB4	RALGDS	ESCO2	GFI1B	CD74	DOK7	MT-ND2	RAP1GAP	TNFRSF17	HSPA5
	ZNF462	ITGAM	H3F3A	S1PR5	SLC25A33	MAF	BCAS4	LAPTM5	GAS5	RPL24	UCP2	NFKBIA	ALOX5AP	PLAAT3	TRAC	ROR1	LBH	AB_CD25	PRDX6	LIMA1	PPID	GTF3C6	LINC02312	AB_HLA-DR	IFI16	RPL26	MCL1	GNG8	MCL1	SH3BP5	NOP53	BUB1B	HMGN2	ABHD17A	C5orf56	PCNA	SLC1A4	GTF3A	TNFRSF1B	WNT3	IQGAP1	PGA3	CABP5	AB_humanMac_2_Galectin_3	CLEC17A	SCG3	GSG2	AB_CD38-1	TSC22D3
	IL32	SPON2	IL6R	CTBP2	NAMPT	ALOX5	GPR171	AB_CD366	MTSS2	PCED1B-AS1	AB_CD27-1	AB_CD102	WHRN	MAP3K8	SLA	NFATC1	CA8	CDC25B	XBP1	H3F3A	CLEC2B	HINT1	AB_CD45RB	PTMS	SERINC5	RPS13	SRSF3	TFRC	KLF9	NPDC1	COX4I1	MAD2L1	GINS1	S100A6	PSME1	HIST1H1E	UBE2L6	DDX39A	KCNK1	MT2A	PTGER4	MCAM	PTPRN	ITGAX	C17orf98	AB_CX3CR1	H3C4	IGHV1-69-2	SKIL
	TXNIP	C1orf21	LINC01934	TRGC1	CREB3L3	TNFAIP3	AB_CD69	CORO1A	RPS13	RPS4X	PIM2	C10orf128	CD300A	GZMH	CD99	YPEL3	SLC30A3	JPT1	NSD3	RGS19	MORF4L2	ARPC4	ITM2A	TXNDC17	RBMS1	AB_C5L2	PCNX4	IL4I1	AB_CD36	IL9R	SNHG29	PIF1	E2F7	HLA-E	IFNB1	HMMR	RBPJ	DKC1	SIRPG	LIMD2	RAB11FIP1	PCLAF	P2RX1	AB_HLA_F	AB_CD24	THBS4	C10orf10	IGLV7-46	SYTL3
	IL2	AB_CD226-2	EVI2B	MLC1	CYTOR	PERP	MYL12A	ACTB	LEF1-AS1	RPL36	GK	AB_CD117	PTGDR	DKK3	TFRC	FLT1	GEM	IFI27	HSP90AB1	ATP5MF	NOP58	PDCD1	H3F3A	CD59	FAS	AB_CD115	SKIL	ANXA6	TNFAIP3	CD63	SLC25A6	SPAG5	UBE2T	ABI3	CD38	CLSPN	AB_CD224	MTCH2	CXCR6	ANXA2	TAGAP	YBX2	AB_CD226-2	CLEC12A	GAB1	SDC2	HEPN1	IGKV3D-15	CHD1
	PRDM1	FHL3	CD40LG	TRGV5	KIAA1549	SPOCK2	LSP1	ITGA4	SH3YL1	AB_CD4-1	BCAS1	ALOX5AP	CCR9	GUK1	IL32	ZFAT	H2AFZ	LINC00891	CR1	CALM3	UBE2B	DCTN3	AFF3	LYST	FRMD4B	CIRBP	AB_CD27-1	RBPJ	AB_CD8	TUBA4A	COMMD6	KIAA1524	PTMA	MYOM2	SHISA5	CENPF	LIME1	PSMA2	MZB1	HLA-DMA	TOB1	IGHV4-59	ITGB5	AB_CD31	IGHG1	SELENOP	GPR4	AB_gdTCR	EML4
	SLC40A1	LAG3	SIRPG	OSBPL5	TNFSF10	BIRC3	JAML	ANXA2	RPS5	RGS10	DUSP16	TNFSF13B	AB_mouseCD49f	OAZ1	RAP1B	ACSBG1	CCDC50	CD2	UBALD2	COX6A1	PPP1R2	AES	UNC5C	ILDR1	ETS1	RPL22	HCG18	EMP3	MIR222HG	TPI1	NPM1	NCAPH	UNG	AB_KLRG1_MAFA	DHX58	NDC80	TMEM173	DANCR	CTSC	AB_CLEC2	HN1	TLE5	SH3BGRL2	NLRP3	MS4A7	TNC	FKBP8	IGLV2-8	IER2
	KRT7	GZMA	C16orf87	DRAIC	PLN	NEFL	COX6A2	JAML	NPM1	FCMR	VAV3	PLCB1	TAGAP	HLA-E	FKBP1A	HEY1	IL6ST	SELPLG	SYNE3	YWHAB	FOS	AB_CD95	RAPGEF5	PDCD1	IL6R	B2M	JMY	FKBP1A	KLK5	ITM2C	CD48	H2AZ1	CHAF1B	CEP78	H3-3B	CKS1B	CAPZB	PDIA6	TXK	TPSD1	PHLDA1	TROAP	AB_CD109	CD163	HVCN1	C10orf10	DFNB59	AB_humanMac_2_Galectin_3	STK17B
	CSGALNACT1	AB_CD72	METTL8	TXK	GPR42	LST1	SYNGR1	CALM1	FKBP5	CD55	FAM129A	AB_CD44-1	AB_CD307e	KLRF1	TMBIM6	NR3C1	F5	WARS1	KNOP1	NDUFA12	SRSF7	IL32	CPXM1	C12orf75	KLRB1	DDIT4	CLK1	BATF3	AB_CD54	TTC39C-AS1	LINC-PINT	ANP32E	SGO1	APOBEC3G	PMAIP1	SAC3D1	DBI	HPDL	PSMB3	SERP2	FAM46C	HMGB2	GP1BA	CCL3	DCLK2	DST	FRZB	IGHV3-20	IRS2
	OSM	CLIC3	CAPZB	XCL1	MIR4435-2HG	LINC01644	PTPN22	TP63	ROBO1	RPL10	TENT5C	NRIP1	S100A4	SRGN	FKBP5	SARDH	FGFR1	PPY	FBXL8	NDUFB2	HSD17B7	CAPZB	CNR2	REC8	TNFAIP8	CRIP2	OSER1	IL21	PLAAT4	ACTN4	UQCRB	H2AFV	BRIP1	PFN1	BCL2L14	CDT1	GBP5	BOP1	DUSP16	LINC01728	ITGB1	POLQ	TMEM158	AB_Iglightchainl	AB_HLA-DR	CTRC	STRADB	IGLV3-27	DNAJB1
	TMEM273	AB_CD18	CITED2	MATK	ASPH	B3GALT2	PTGER2	RAP1B	RPS28	RPL21	MGST2	AB_CD2	UPP1	CYBA	FTH1	SRGN	CDO1	PRDX1	IL7R	CDK2AP2	HIST1H2AC	ATP5F1E	BCL7A	MT1F	PASK	AB_CD19	JOSD1	CD7	MAP1LC3A	PPDPF	AB_MERTK	CCNF	AUNIP	SYNE1	GBP2	CENPU	OASL	UCK2	ETV7	AB_CD366	TGFB1	GAPDH	TLN1	LYN	FFAR1	COL4A2	HBG1	IGKV2D-29	ATP1B3
	TIAM1	SRGN	ANKRD55	ATP8B4	MAF	CCR2	LAG3	RRM2	SEPT11	RPL12	PTGIR	MATN2	NCF4	C1orf21	H2AFZ	CTTN	PHACTR2	FAM174B	MB21D2	PDIA3	ST13	ASB2	HRK	HLA-DRA	SMAP2	AB_CD366	TUBB4B	CAMK1	BTG3	ATP5F1E	SNHG32	SMC2	TYMSOS	CMKLR1	RBCK1	HMGB1	MT1E	YWHAE	SDF2L1	CCDC141	TUBA1C	H3C12	SAMD14	MEF2C	PKIG	FAP	YOD1	IGHV3-71	DUSP8
	IL4R	AB_CD201	LINC00402	KLRC4	ALOX5AP	NCAPG2	ATP8B4	RORA	NAA16	LINC00861	CORO1B	FSD1	ITM2C	CD244	F2R	LGALS9C	ITGB8	CD52	CHD7	TRAC	MRPS6	MAF	SMCR2	POMP	ITM2B	EEF1D	DDX3X	LINC01281	RGCC	CAPN2	EIF3K	PCLAF	RPA3	MATK	LGALS3BP	CKS2	HLA-C	RUVBL1	HIVEP1	GNA12	AHR	GNA15	AB_CD63	CTSD	LYN	EFEMP1	FAM155A	AB_NLRP2	DUSP4
	SEPT11	AB_Galectin-9	TIFA	PTGDR	PHLDA1	CYP4B1	LCP1	GAPDH	RACK1	RPS27	LINC01281	DUSP1	SYNE2	TMEM2	IGFL2	TMEM123	CD109	TBC1D4	HIST1H1D	PSMB6	CTNNAL1	TWF2	MYO1E	PMAIP1	VSIR	RPS20	RNF139-AS1	WNT10A	FOSL2	LRRFIP1	HINT1	KIF20B	MELK	AB_CD85j	NUB1	WDR34	ETV7	BATF3	BAX	MT1F	KDM6B	DDIT4	GAS2L1	IL1R2	CD74	PPIC	SMCO1	IGLV3-9	KPNA2
	TOB1	AB_CD59	CD2	KRT81	PPIB	CD28	CD101	FAM124B	TTC24	FYB1	DNPH1	MCAM	ARAP2	SYNE1	GK	RNF19A	CYP7B1	GMFG	AB_CD27-1	GZMA	ABHD3	PTRHD1	MAOB	GBP4	CD28	UBA52	IDI1	TMEM173	GFOD1	CDC25B	UXT	CENPN	MKI67	GSTP1	TRANK1	TTK	AIM1	NPW	MCM5	LINC01550	AB_CD103	CENPW	SCN1B	PLAUR	SHISA8	MMP14	CRISP3	IGKV1D-16	IRF2BP2
	RUNX2	AB_MERTK	MCUB	KRT86	AB_CD224	PLP2	RABAC1	CD52	RPS24	NPM1	RBMS3	CPNE7	TNFSF10	AB_CD45-2	RUNX2	GLCCI1	CLNK	S100A11	STRADB	HSPA5	CYCS	CD2	ITGAD	COX8A	UGP2	SRSF5	TOB1	LHFPL6	DUSP5	CDKN2D	ZFAS1	KIF18A	FBXO5	OSBPL5	ZNFX1	ATAD2	ATP5F1E	BZW2	SLC2A8	PHACTR2	DUSP10	INTS6L-AS1	VCL	TOMM6	TRIM55	CD9	ILF3-AS1	AB_TauPhospho_Thr181	BHLHE40
	GALT	AB_CD56-1	BLVRA	CCL5	RPLP0	CD40LG	ITGB7	RTL3	ANTKMT	RPLP2	SKAP1	LGALS3	SMAD3	PSMB9	CD3E	H2AFZ	PTPN11	CCR9	ZNF462	ATP5F1	CCT6A	WDR1	AB_TIM4	PSMB2	FOXO1	FXYD7	CITED2	IL2RG	SP140	AQP3	EIF3L	SKA3	CARHSP1	TTC16	MYL12A	TICRR	PFN1	IFRD2	CD2BP2	GMFG	CDKN2D	S100A10	MGLL	THBS1	CBFA2T3	LRP1	FOXL1	IGKV1D-13	TOB1
	SORL1	RHOC	CRIP1	TRGV3	SNED1	RIPK2	NT5E	TNFRSF18	THEMIS	RPL10A	SPATS2L	TPBG	CAST	AB_CD319	FXYD5	MAGEH1	PRKCDBP	AB_CD150	INPP4B	LAT	LCN10	GYPC	AB_CD11b-2	PSME2	SLC2A3	RPS7	HSPH1	CYB5A	AB_CD62P	LTB	EEF1G	NDC80	NUDT1	KIF19	ZC3HAV1	SMC4	HLA-B	MRPS34	GAPDH	PMAIP1	ANTXR2	C3orf49	HIST1H3H	LILRA5	ZNF804A	PCOLCE	COL8A1	IGHV3-66	VPS37B
	STT3B	PTGDS	AB_TIGIT	DBN1	GNAQ	AB_CD35	CD2	LINC00636	SCCPDH	RPS9	AB_CD62L	AB_CD224	ARHGAP15	ATP5F1E	IL21	RPH3A	ELMO1	CD28	TTC39C	ATP5MC3	HNRNPA2B1	CCDC167	CBFA2T3	SPAG6	MYH9	RPL41	GLA	ARL6IP5	GBP2	CSTB	RPS26	PARPBP	CCNE1	TSPAN2	WARS1	CENPA	FYB	PSMB2	APOBEC3G	MYO7B	DENND4A	LINC02681	FTH1	MARCH1	LRRK1	C1QA	GYPC	IGHV5-10-1	SRSF2
	CFAP36	CCL4	SLC9A9	ADGRG1	ANKRD28	S100A6	TPST2	SLC25A5	GALNT2	RPL31	CD177	AB_CD18	LINC01934	KLRK1	ADAM19	CD59	PROC	INPP1	SESN3	RBM3	ZC3HAV1	AB_CD62L	ID3	CCDC28B	PNRC1	RPS15A	AB_CD5	SEC61B	GNG2	RABAC1	EEF2	POC1A	SPC25	AB_CD8a	SMCHD1	HMGB2	YWHAB	TKT	BTNL9	SESN3	CYSTM1	WASIR1	AB_CD235a	AB_CD169	AICDA	MT-CO3	PGC	TXNDC5	MT2A
	SNHG18	AB_CD192	YWHAB	PDE4A	P4HB	TIFA	IDH2	BLK	C2orf40	LYPD3	BFSP2	CERK	IL18R1	FGR	SDC4	YPEL2	SRGN	PKHD1	VIM	C12orf75	KLF2	MT-CO2	STMN1	ATP5MG	FOXN2	SARAF	RGS1	GNG5	IL10	LINC00892	GAS5	FAM72B	SHCBP1	SYNGR1	N4BP1	CENPE	GZMH	CMSS1	NAMPT	SEPTIN6	AB_CD96	MT-CO3	CST3	NCF1	HLA-DRA	TIMP2	ATP5EP2	IGLV5-45	JOSD1
	CHDH	TRDV1	CPA5	PDGFD	AB_CD39	DUSP16	NCAM1	ENTPD1	TLE5	CMTM8	LINC00891	ODF2L	PBXIP1	PCED1B-AS1	ENTPD1	CDK5R1	RNF19A	IL2RA	SOCS1	PPP1R18	NFKBIE	LGALS9	SERPINE2	CCR2	MTHFD2	RPL17	PTMA	HSPB1	PPP1R15A	ARPC3	LDHB	RAD21	POLQ	MYO1G	HLA-A	PRC1	MSC-AS1	MRPL3	TSHR	CD74	RASGEF1B	PLAAT5	PIEZO2	DUSP6	POU2F2	CPB1	AB_CD36	FCRL5	RHOH
	SEC61G	AB_CD16	C9orf16	VCAM1	LDHB	IFI44	GALNT2	INPP1	LINC02580	LRRN3	PMCH	TMEM171	GABARAPL2	C12orf75	PTPN13	LAT	FKBP1A	TLE5	LINS1	CD99	PGF	SHMT2	ZNF667-AS1	AB_CD94	FAM129A	AB_CD1a	RPL22L1	RAN	SCML4	PCED1B-AS1	AB_Integrin-7	HMGB1	LMNB1	SLC9A3R1	SLFN5	KIF14	CKS2	RPS2	KIAA0319L	AB_CD43	DDX3X	PDLIM3	CFAP161	HIST1H1E	HHEX	SPP1	DKFZP434H168	AB_CD79b	CNOT6L
	ZBTB16	AB_CD164	JPT1	AREG	RTN4	SATB1	CD248	YWHAQ	RPL12	RACK1	ID3	THY1	HLA-F	SEPT7	LGALS3	RGS10	KLHL42	ANKS1B	LPIN2	PDLIM2	ACTRT3	PSMA5	AB_CD200	AB_CD223	LY96	MYL12A	KPNA2	GCNT1	CITED2	TOB1	RPS4Y1	FAM72C	XRCC2	CHST12	CNP	C21orf58	SMC4	SSBP1	CBLB	PON3	TUBA1B	SQSTM1	ENKUR	C1QA	RPS4Y2	IFITM3	MIR194-2HG	IGKV1D-33	SDCBP
	PTH2	AB_CD54	AB_CD99	FCRL3	H3F3A	REEP3	ZYX	CDCA7	ZNF496	C1orf162	AB_CD200	SATB1	SLAMF1	STK17A	CSGALNACT1	FYB	TBC1D4	YWHAQ	RBMS1	ATP5G2	TRIM26	GBP4	MAP3K1	YWHAE	LAPTM5	AB_CD194	AARSD1	TXNDC17	AMD1	CNTNAP1	AB_CD45RB	ESPL1	RFC2	C9orf142	TRAFD1	BUB1	STAT1	PSMA3	SNX18	MT1E	PLK3	RPL37A	NCOA4	TNFAIP6	JCHAIN	COL11A1	BCL2L1	FAM30A	DNAJB6
	LOXL1	AB_CD134	NR3C1	EXOC1L	SEC61G	MAP3K4	SRGAP3	AB_CD95	LSR	RPL23	AB_CD122	SESN1	HCST	MS4A1	AB_CD146	LRMP	SNX9	S100A10	CLDN5	ABRACL	GNA15	C16orf87	PPP2R5C	ANXA2	NLRP6	AB_CD107a	SARAF	F5	FOSB	IATPR	AB_CD138-1	DIAPH3	MSH6	KLF3	PSMB10	AB_CD38-2	AKIRIN2	MRPL15	SPN	SMCO4	GOLGB1	LINC01619	GRB14	RNASE2	LRRK2	MMP11	SPON2	AB_CXCR3	MCL1
	CXCL13	FGR	SRGN	PTGDS	PRNP	MYC	TRG-AS1	IL12RB1	LDHB	MAML2	NIBAN1	AB_CD96	HLA-A	ITGB2	CSF1	KCNJ6	NR3C1	MYL6B	UBQLN2	GRK6	TIFA	HIST1H1D	ANK1	CLDND1	TGFBR2	RPLP2	RRP12	MAP2K3	GZMB	C1orf162	AB_CD172a	PHF19	SKA3	SSBP3	TRIM25	DEPDC1	RGS1	PPIA	RALA	RGS6	HIPK1	ELL2	STON2	AB_DR3_TRAMP	KLHL14	CAVIN1	AB_CD24	IGKV1-13	GPR183
	CDK2AP2	FCGR3A	MAGEH1	GSTP1	CCDC86	ABRACL	C12orf75	SMOX	TBXA2R	RPS21	PLCL1	CCDC107	MT-CYB	AB_Integrin-7	SLC1A4	COTL1	WARS	TSPO	NFKBIZ	VAMP8	UBE2A	HIST1H1C	CCR9	SEM1	ITM2A	RPS3A	AB_CD7	LY75	PTPN22	AB_CD48	EIF3F	OIP5	CENPN	RASSF1	IRF1	HMGN2	UCP2	SET	CCR5	AB_CD93	GNG2	HMGB1	TDRP	AB_CLEC2	KYNU	RNASE1	HEMGN	LYZ	ISCA1
	IL3	AB_Rat-IgG1-2	GAPDH	HCST	CD80	MB21D2	CHCHD10	AB_CD45RA	MMP28	S1PR1	ZC3H12D	NR1D1	HLA-C	CXCR4	ZNF282	TP53INP1	SMIM10L2A	TMEM173	CDC14A	LDHA	BTG2	SLFN5	AB_CD44-1	ARHGDIB	GPRIN3	AB_IgM	ELL2	IL1RN	NAMPT	PDCD5	EIF3H	APOBEC3B	HMGB1	MYL12B	PML	HASPIN	CEND1	ILF2	CD2	S1PR4	CDC14A	DDIT3	GSTA1	AB_CD62P	DERL3	FTL	TBC1D29	IGLV10-54	ETV3
	GPR146	KIR3DL2	IL21-AS1	CYBA	KIF5B	GPR65	SCML4	H3-3A	SPINK2	BACH2	ARHGDIB	PLXND1	LUZP1	LAG3	GAPDH	ZNRF1	HSPA12A	CXCR3	ATP1A1	DAD1	SNX3	UBXN10-AS1	TMEM37	OSTF1	NAP1L4	ZFAS1	CXorf40A	VOPP1	PRDM1	SLF1	SNHG6	SKA1	RIBC2	MYBL1	FBXO6	SGO1	CAVIN3	EXOSC5	MTSS1	CARHSP1	TMEM43	MYBPC1	RAB32	TKT	LIMCH1	PMP22	KLRF1	IGHV2-26	DDX24
	RPL36AL	PLAC8	LGALS9	HSH2D	FTL	EGLN3	TNIP3	GBP5	PGLYRP1	TPT1	CCM2	PRF1	AB_CD73	E2F3	CD320	RAC2	INPP5F	PDCD1	CA6	PSMB8	HIBCH	H2AFV	TMEM213	CRYBB1	ABCC1	TMSB4X	CCNL1	GPX4	FAM3C	TBXAS1	AB_GP130	SPDL1	PSMC3IP	HLA-A	TRIM21	RACGAP1	ITM2A	PGK1	PDIA6	PPM1G	HPCAL4	SNTG2-AS1	PROS1	NFKBIZ	LINC02422	SULF1	NFIX	IGHV3-69-1	ELF1
	LAT2	APMAP	AB_CD161	CAPN12	PARVB	FUT7	CD3E	ATP5F1B	SH3BGRL2	NDFIP1	TRAC	GZMA	AB_CD106	KLRC4	MCAM	CD27	GBP2	BIK	PABPC1	SLC25A5	FTL	BFSP2	FGD4	CARHSP1	SFXN1	TRBC2	GTF2B	IL21R	SDC4	REEP5	AB_Siglec-8	INCENP	EZH2	DBI	CASP1	DSCC1	IFI27L2	EEF1E1	FOXB1	TOX2	AB_CD99	TGFB1	GP6	STAB1	CD40	MT-ND1	ATP5I	IGHV3-73	GSPT1
	NOSIP	LYAR	AB_CD45-1	LITAF	FGF20	HLF	OXNAD1	CCNB2	RPL14	LDLRAP1	GNG8	RPLP0	UBXN11	HLA-F	UBE2E3	DENND2D	CTLA4	ANXA5	RPS6KA5	ATP5PF	PWWP3A	RAC2	AB_CLEC2	STEAP1	MCUB	RPL34	PER1	ADGRE1	DNAJB4	AB_CD96	AB_Rat-IgG1-1	ZWINT	CDCA7L	PLEKHG3	GIMAP4	TMPO	CD86	C20orf27	CORO1A	ARHGDIB	AB_CD102	WDR86-AS1	AB_GARP_LRRC32	AB_CD85j	MALRD1	A2M	LINC02731	MT-ND4L	PNRC1
	AB_CD58	HPGD	GOLGA7	AB_CD360	SLC27A2	DDIT4	CD99	ATOX1	PTK7	LEF1-AS1	OAZ1	PLD1	AB_CD224	SEPTIN7	UCP2	CNIH1	GFOD1	GPR183	MAP1A	GNG5	TNFSF9	POMP	PAWR	LINC01943	APP	AB_CD79b	HIP1R	TNFRSF25	MYC	IFITM1	AB_CD4-1	NUCKS1	SNRNP25	MTSS1	CD164	GGH	S100A4	PTMA	CCL23	S100A6	PER1	S100A4	PDLIM1	AB_CD42b	WNT16	LAMB2	H4C3	IGKV1D-12	UBC
	RGS16	AB_CD44-1	SLC2A3	TNFRSF9	LINC01106	OSTF1	RGS18	YWHAH	MT1F	KLF2	LINC02099	TNFRSF25	ITM2A	PTP4A2	HCST	MYL6B	COL6A3	DYNLL1	ARHGAP15	SEC61B	YWHAH	NDUFA12	NDN	SLC25A5	AP3M2	NDUFA4	G3BP2	PHLDA2	PFKFB3	PPIB	PPA1	MTFR2	C19orf48	AKR1C3	CARD16	HIST1H4H	FAS	PTGES3	PSME2	CNR2	ATP2B4	H19	AQP10	MT-CO1	FRG2C	PRRX1	MARCH8	BNIP5	IFRD1
	ASPH	GLRX	GYPC	PLAC8	RAB37	CAPG	PERP	KIF20A	SPINT2	RPL4	METTL7A	CCR5	TSC22D3	TUBA4A	ARID5B	LMO7	FILIP1L	XXYLT1-AS2	PNRC1	ATP5C1	TUBA1A	UBE2L6	RIPOR2	S1PR4	TARSL2	MAL	EIF5	PRMT1	GPR18	SELPLG	C12orf57	FAM72D	POC1A	CD300A	HLA-B	TRIP13	AB_CD38-1	ISOC2	MYL6B	MET	ATP1A1	MT-CO2	DRC7	PILRA	BTN1A1	NOVA1	LYL1	MALAT1	CDKN1B
	IL2RA	TRDV3	CDCA7	ABCB1	CD200R1	DAB1	DSTN	SIRPG	PTPRK	RPS15	SETD7	GTF3C1	FYN	IKZF3	MIR4435-2HG	SLC40A1	CD82	SELL	SAMHD1	COX6B1	TSPYL4	PSMA2	CBX2	LSP1	PCNX1	UQCRB	TUBA4A	TUBB	AB_CD41	FTH1	SNHG8	NCAPD2	CDK1	RAP1GAP2	RARRES3	ARHGAP11A	PTRHD1	GNL3	TSHZ2	AB_CD164	CDKN1A	H1-5	RAB31	CD93	CD79B	ABI3BP	METTL12	IGKV1D-39	ARID5A
	PI16	EFHD2	ARPC3	PIK3R1	FAM129A	PRDM1	CD8B2	TXN	C19orf81	AB_CD38-1	BACH1	SPG20	KLRB1	GSTP1	KIAA1324	HYKK	PKM	IL32	UGP2	TALDO1	NUDT4	PFDN4	MOXD1	ATP5MC3	ZFP36	PCSK1N	NXT1	LGALS1	IFIH1	ANKRD28	AB_CD7	CIP2A	POLD3	CD8B	NAPA	HIST1H2BM	LINC02446	HNRNPDL	STAT3	PTPRG-AS1	C21orf59	IGKV4-1	MMD	AB_TCR_Vb13_1	FGD2	C3	CA2	POU2AF1	BCAS2
	NIBAN1	DBN1	ZNRF1	FCRL6	CAPG	FHL1	GLUL	ZC2HC1A	PRL	RPS16	TTC39C	FURIN	CD99	ZEB2	DAPK2	HIPK2	LPL	ARHGDIB	PLCL1	LY6E	HES4	SIT1	EVL	CTSC	STK4	COMMD6	KDM6B	ATOX1	ANXA2R	AB_CD5	AB_CD338	CKAP5	RANBP1	TM4SF19	HLA-C	HIST1H2AG	AB_CD45RO	PEBP1	CCR1	DBN1	ACOT7	FAM81A	CTSA	MS4A7	HTR3E-AS1	VCAN	RGS6	AB_CD32	RBM39
	TPO	APOBEC3G	DYNLL1	LYST	CYBRD1	NTN4	EMB	CD28	LY86-AS1	C6orf48	MAST4	AB_CD244	TRGV10	WIPF1	IL6R	CTSB	LINC01229	RBPJ	C18orf25	CCDC107	MUM1	CASP4	AB_CD62P	ZNF683	TLK1	AB_CD105	ZNF10	HLA-B	SRSF7	FLT3LG	AB_Notch-1	NEIL3	CENPK	ITGAL	TMEM123	HIST2H4B	PPA1	TOMM22	PHLDA1	XXYLT1-AS2	RFX2	MT3	FSTL1	AB_CD258	BACE2	ATP5O	TPTEP1	AMPD1	CD55
	TRAM1	PLEK	EEPD1	CEP78	CHGB	CALM1	KLRK1	TRAC	RPS21	ARMH1	NINJ2	GBP5	TC2N	RUNX3	UBALD2	DGKG	SEC11A	CD79B	HTATSF1	CTSC	DDIT3	BAK1	AB_CD235a	IFI27L2	SLC4A7	ATP6V1G1	HES4	TNIP1	IL3	ARL6IP5	FAM153CP	FBXO43	MAD2L1	LPCAT1	ODF3B	HIST1H2BO	BTF3	EIF4A1	CCR2	MEG3	FAM102B	LINC02254	MPL	S100A6	TNFRSF17	TPPP3	FGF2	IGHV4-55	RGS16
	ARL6IP5	SYNGR1	ARPC1B	VAV3	YBX1	CD52	AB_CD38-1	AB_CD305	AB_CD21	RIPOR2	XXYLT1-AS2	BHLHE40	CD3E	PPP2R5C	TNFRSF1B	DNAJB14	NPDC1	ATP5F1E	KLHL5	TLN1	GLA	EPSTI1	CPNE7	MYL6	FAAH2	RPL19	PPP1R15B	ZBTB32	TBX21	SEC61B	AB_CD55	CKAP2	RECQL4	USP28	NEXN	CDC45	PLAAT4	UQCC2	IFI27L2	MCM5	AB_CD275-2	MAP3K8	PDGFA	MT-CYB	IL13RA1	TTR	CCL25	IGKV1D-43	KLF2
	PRSS3	UBB	ATP5F1E	CATSPER1	KNL1	MATN2	CYBA	H2AZ1	DSC1	RPL38	SELPLG	AB_CD44-2	AB_CD96	LGR6	LHX1	CD4	HIF1A	EVA1B	TRIM22	PSMB10	PRDX1	TAP1	RAB37	AB_CD122	LEPROTL1	RPL35	FAM122C	BASP1	ADRB2	MIF	AB_CD325	KIF22	SIVA1	CYRIB	TMSB10	NCAPG2	HELLS	RPL5	ATP9A	POP4	FAS	AB_CD16	DAB2	IER3	LINC01800	ANGPTL2	GJA4	IGHV3-52	PMAIP1
	FAS	TRGC2	ADSL	CD247	HTR1F	DST	NELL2	B3GALT2	TXNIP	MDS2	YWHAB	ATF7IP2	CD52	TRGV2	TBXAS1	LBH	JAG1	TENT5C	GSTK1	APRT	ULBP2	PSMB2	TMSB10	ANXA1	CMTM7	RPS12	NPIPB4	IZUMO4	MAPRE2	DYNLL1	FBL	MELK	USP1	CLIC1	XRN1	ECT2	SLC25A3	COX5A	SUMO2	AB_Rat-IgG1-2	EHD4	AB_CD15	AB_CD29	MGST1	LILRA4	GPNMB	PLA2G5	AB_CD337	CCNL1
	LINC00511	AB_CD38-2	ARHGDIB	GAS7	OSBPL1A	GRASP	RUNX3	HIST1H3F	LEPROTL1	RPSA	METTL27	SPTSSB	BHLHE40	CYRIA	CLNS1A	SEPT9	COL9A2	CRYBB1	MAP3K1	TRAPPC1	GPN1	C9orf16	LAT2	CD86	PPP1R2	TMA7	HERPUD1	CD83	SAMSN1	GNA15	COX7C	CENPM	ACOT7	ADGRG5	CHST12	KIF22	TOX2	RBM3	CLIC1	BMERB1	NEU1	NFKB1	CTDSPL	PLXDC2	GRM7-AS1	IGLL5	PMFBP1	IGHV4-28	JMJD6
	AB_CD226-1	SYTL2	FTH1	CCNJL	PPP1R1C	ADAM19	DPF3	CLIC3	SARAF	TMEM123	AB_CD224	SPRY1	MDFIC	USP28	NPDC1	ITGB8	ADAMTS3	RGS1	CBFB	GZMM	NGRN	ATP5MC2	TRDV3	C3orf14	GIMAP7	COX7C	SRSF2	NDFIP2	FABP5	AB_CD224	AB_CD202b	TRIP13	RFC5	SPN	GIMAP7	H2AFZ	ACTB	TUBA1C	BST2	AB_MERTK	KLF3	BIRC5	BMP6	CD302	CD83	PLVAP	AB_CD126	IGKV1-33	SMCHD1
	PDIA6	S1PR5	SESN3	GFOD1	AB_CD38-1	HRH4	GYG1	NMRK1	RPS23	AB_CCR7	IL2RB	UBXN10-AS1	AB_CD44-1	HLA-DQB1	HSD11B1	NUCB2	BCAS3	CCR2	ANKRD12	CDC42	HMGB2	TRIB2	AB_CD307c	POPDC3	NSMCE3	OAZ1	ZDBF2	WARS	NEDD9	CYTOR	SNHG25	TMPO	ZNF367	RGS9	LAG3	DUT	COX5A	CCT4	PTPN6	NCOA1	PLEC	HIST1H4C	VEPH1	H2AFY	DGKG	ABCA8	BNIP3L	IGKV1-8	OSM
	CANX	AB_CD275-2	PBXIP1	AB_CD27-2	SRGN	S100A10	STYK1	GMFG	RPSA	SH3YL1	HS3ST3B1	PDE4D	ARL4C	ABI3	UGP2	FAIM2	G0S2	TK1	STK17B	PGK1	IFNG	ATP5MF	PTK7	CLTA	TESPA1	TMSB10	SC5D	PPARG	ELF1	FXYD1	AB_CCR10	GPSM2	DNA2	LSP1	TNFSF13B	UHRF1	HLA-DQB2	FKBP4	NDFIP2	CTLA4	EEPD1	FABP5	LGALS12	AB_CCR3	CCL19	CREB5	PLA2G10	CD79A	JMY
	HPGDS	AB_Rat-IgG1-1	CCDC167	ITGB2	AMOTL1	ICAM2	APOBEC3H	LHX1	FOXP1	GIMAP1	NSD3	PDCD4	ODF2L	PPP2R2B	CCDC50	TLR9	PGAM1	IFNG	CYTH1	ATP5J	TSC22D1	COX8A	ACTN1	IFNG	NCK2	TRAC	LDHA	LTB	DNAAF2	MFSD10	ALKBH7	H2AFX	MTHFD1	CFL1	TAPBP	KIAA1524	AB_CD11a	PKM	CCNA2	CSTB	PIM3	TXN	FRMD3	RAB31	CR2	ITGB8	RAB3IL1	IGHV3-64D	G3BP2
	ZNF365	SLAMF7	CCDC50	MAFF	NXPH3	RPS6KA3	PRF1	MT-CO1	SCML1	NELL2	CSF2RB	AB_CD28	GBP2	CD99	TRPS1	PTPRCAP	SMPDL3A	FAS	AFF1	POMP	SNAP23	CHI3L2	UBE2E2	S100A10	FXYD1	C12orf57	DDX24	HSP90AB1	SIAH2	CTSA	AB_CD126	SKA2	GINS3	PCED1B-AS1	SP140	EXO1	TNFRSF8	GTF3C6	RAC2	HBS1L	ZC3H12D	CDT1	ZNF185	LRRK2	MEF2C-AS1	MXRA8	SATL1	SCGB1A1	RANBP2
	ICAM2	TLE1	IL21	RIN3	NTRK1	AB_CD44-1	CD160	HRH4	PRKAR1B	EIF2S3	B2M	OSTF1	KLRG1	GABARAPL1	SEM1	MRC1	GK	FRMD4B	KLF9	ELOB	PRRG4	MRPL51	GPR173	RGS10	CTSL	S100A6	ISG20L2	TPI1	AB_CD99	ADAM8	SMDT1	ARHGEF39	IFI27L1	PYHIN1	ALOX5AP	CENPW	S100A6	MRPL20	MYL6	RAB27A	AGPAT4	MMP2-AS1	HIST1H2BJ	CCL3L1	CCL17	SEMA3C	C14orf2	SCGB3A2	CYCS
	XBP1	CXXC5	NOSIP	CRTAM	AHR	CERK	CARD19	PRDX3	PCED1B-AS1	CAMK4	CTSC	MKNK1	LPIN2	GIMAP4	TPST2	GFOD1	MYL6B	CORO1A	MYL12B	MINOS1	DNTTIP2	LDHB	DACH1	FKBP1A	SNHG6	AB_CD138-2	KLF4	MB	LINC02132	CYBA	AB_Rat-IgG1-2	CALM3	H2AFV	SLCO4C1	TMEM140	SMC2	ARHGAP10	WDR43	TP53INP1	NRIP3	SAMHD1	TUBA4A	CETP	TMEM176B	MT-ND1	PDK4	NPHP3-ACAD11	MT-CO2	HERPUD1
	ANXA5	AB_CD203c	PVALB	FAM46A	TCN1	RARG	LY6E	ABRACL	GPR155	EEF2	ICOS	YWHAH	CD40LG	TPST2	GNLY	SREBF2	CORO1B	TMEM167A	ST6GALNAC1	PARK7	AB_CD45RO	AB_CD45RO	SLC16A8	FAXC	SLA	AB_CD158f	IFRD1	LDHA	RGS2	TPM3	GABPB1-IT1	DTYMK	GAPDH	PAXX	TRIM38	HIST1H2BL	SEC11C	EEF1B2	TMBIM6	AB_Notch-1	IL5RA	AB_CD49d	SMCO2	FCGR2A	GRIK2	CCL19	TSSC1	IGLV8-61	PDCD4
	ACVR2A	AB_CD202b	TRAT1	BNC2	TNFRSF18	SMAP1	IFITM3	AB_CD278	LBH	AB_CD47	HAPLN3	CD69	CAPN12	FABP5	LIMS1	CEP128	NTRK2	GTF3C6	KIAA0040	MSN	RHBDD2	ISG20	N4BP2	DECR1	HIPK2	AB_CD140b	SAP18	TMPRSS6	LAX1	LIME1	SNHG14	LMNB1	IDH2	AES	TRIM69	SPAG5	LGALS3	SYNCRIP	TPI1	AB_CD95	MOK	LINC02327	C19orf33	CD300E	COL4A4	LAMA4	GDF9	S100A9	SAT1
	GCSAM	A2M-AS1	AB_CD82	CHST2	GMPR2	ZNF462	HDGFL3	H3F3A	C6orf48	AB_CD307e	SPOCK2	LYAR	PACSIN1	GYG1	TPI1	SERTAD4-AS1	PMCH	HRH4	DAAM1	PSMD8	SELENOW	ANKS1B	NAALADL2	AB_Integrin-7	ANKRD12	SOD1	MAPK1IP1L	HLA-A	RAB8B	ACTG1	ATP5MG	UBE2T	H4C3	PLEKHF1	MYD88	POC1A	SLC27A2	APEX1	PHLDA3	CBLB	MAP9	IGFBP5	FCER1G	AB_CD303	DOK3	CXCL12	FBXO7	IGHV6-1	OSER1
	EGLN3	IL2RB	RAC2	APMAP	NR3C1	AB_CD117	PLP2	SASH3	SCGB3A1	EEF1G	SGMS1	SLAMF1	CKLF	AB_HLA_A_B_C	TXN	PON2	TNC	IL6R	NELL2	COX7A2	JMJD6	RTRAF	RASSF8	PPP1CA	CEBPB	RPL36A	PLK2	ACTG2	PIM3	HLA-B	MZT2B	GAS2L3	HNRNPAB	AB_CD11b-2	USP15	CIT	H2AZ1	GADD45GIP1	PSMB10	AB_CD172a	MAP1A	E2F2	CHST8	AB_CD14-1	CIITA	AB_CD144	KCNH8	MT-ND5	CCNH
	MAP3K1	AB_Rag-IgG2c	LCK	SLA2	EEF2	ODF2L	TRAC	CEND1	ATP8A1	SULT1B1	AB_CD146	GPR171	CD320	PRKCH	KCNK5	PLCL2	FGL2	TNFRSF18	GPRC5B	CHMP2A	RBKS	IGBP1	IFNG-AS1	AB_CD39	DDIT4-AS1	SKP1	DUSP2	SLC29A1	AREG	CSF2	NSA2	BCL2L12	SMC3	PXN	TAP2	CIP2A	GYPC	PSMA4	IGF2R	NDFIP2	PNP	RUNX3	GUCY1A1	IRAK3	AB_CD48	TPM2	IGKV2D-40	REG1A	JUN
	DSTN	AB_Notch-2	USP10	PLA2G16	GUCY1A1	CCDC107	CCR1	WDR1	SEMA4D	NUCB2	YPEL2	TMEM273	CCR2	A2M-AS1	TSPAN13	AKR1C1	TRIB1	TXN	AB_CD55	SNRPB	SAMSN1	RPLP0	FCRL3	TMSB4X	CD69	AB_Folate	CHKA	ACTG1	CLEC2B	LDHA	IMPDH2	STIL	DSN1	ID2	SNX6	TUBB4B	SKA2	SLC25A3	GBP4	AB_CD199	YWHAH	CYP1A1	MTURN	LRP1	COL9A3	SMOC2	CCL23	IGLV4-60	LDHA
	CMTM8	IFNGR1	CD82	ARHGAP9	DNER	ARHGAP15	OSTF1	GALM	ZNF667-AS1	EIF4B	RAB11FIP1	PERP	DSEL	CCL3	ARHGAP10	LIMD2	LIMS1	RPS27L	PAG1	CKLF	TNFAIP8	PTTG1	DZIP3	CD2	CDKN1B	GPX4	TIPARP	NFKBIA	CD200	KRTCAP2	APRT	TYMS	NCAPH	PRR5L	SQRDL	RAD51	HIGD2A	HNRNPA1	F2R	MIR181A1HG	BHLHE40	OSER1	CLDN5	AB_FcERIa	KMO	C11orf96	LINC02732	AB_TIGIT	NSMCE3
	LTB	AB_CD11c	THADA	SPECC1	LOXL1	CD4	TMEM14C	IL3RA	CA6	EPHX2	GADD45A	HOPX	EVA1B	CD84	CD276	ARHGEF3	CD59	OGDH	TAF4B	TSPO	MYADM	CDT1	NIN	ATP5F1A	METTL8	AB_CD35	MARCKSL1	PDGFA	GLUD1	CFL1	EIF3D	TK1	NCAPG2	SEPTIN7	WARS	E2F2	CASP4	LDHB	BTNL8	AB_CD99	CAMKV	SCGB1A1	TPM1	AB_CD257	IGHA2	ELN	SMIM1	AB_CD169	BICDL1
	ARID5B	LIM2	OAZ1	KIR3DX1	FAM107B	VCL	KIR2DL4	IFI44	BCAS4	RPS2	CCR3	ARL4C	E2F3	ITM2A	TGFB1I1	PTHLH	ADD3	FCMR	MIB1	FAM49B	SAP30	STAT1	IFITM5	AB_CXCR3	NUDT16	S100A10	ZNF165	UNC119	JUND	TYMP	UQCRH	H2AX	RFC3	PPP1CA	SPAG6	CCNF	CPNE7	C19orf70	CHI3L2	CPNE2	JMJD1C	CSTF3-DT	MFAP3L	SOD2	GABRR3	MXRA5	SMIM15-AS1	IGLV2-5	HN1
	AB_CD294	HLA-C	FYN	FES	ERI1	ITGB1	APOBEC3G	HLF	RPS12	RPL8	RPS27L	WDR86-AS1	FHL1	CYRIB	CD2BP2	PEBP1	ETV7	ARPC3	CRIP1	YBX1	RASL11A	PSMB4	RPIA	TROAP	ARHGAP15	AB_Rat-IgG2b	ANKRD37	CFLAR	FOS	HLA-C	SSR2	PLK4	CENPP	AB_CD18	HAPLN3	SGO2	ISG20	PSMB6	SERPINB1	ADORA2B	CALM2	H3F3B	PPP1R14A	AB_NLRP2	LY86-AS1	PRELP	LINC01350	MEF2C	SNHG15
	MYDGF	AB_C5L2	PLAC8	AB_CD63	C9orf16	AB_CD55	LYAR	PCBP1	USP11	RPL3	PHACTR2	EOMES	KLF6	TERF2IP	PELI1	CCND3	LINC01033	PIM2	DENND5A	PRDX5	ARG2	VCP	BCL11A	LYAR	IFNGR1	SRP14	H3F3B	NHP2	AB_KLRG1_MAFA	EGLN3	AB_CD62L	RPL39L	CDK2	CXCR2	SAMHD1	RRM1	GYG1	ZNF593	GZMH	RAC2	DNAJA1	E2F1	TPM4	AB_CD163	CR1	MT1M	MARCHF3	HSP90B1	STAT3
	EEPD1	CLIC1	IGFL2	LGALS9B	DENND1B	PNP	SCCPDH	AQP3	SOX4	AB_CD55	PHTF2	NTN4	RARRES3	ARHGAP25	PDIA6	LHFP	SH2D4A	CD4	SLC50A1	SEPT1	ATP2B1-AS1	COX6C	SORT1	CBLB	SLC9A9	MALAT1	COQ7	PTGIR	IL5RA	VAMP8	SNRPD2	SMTN	CENPX	GK5	TMSB4X	HIST1H4D	ETV1	RSL1D1	UBE2V1	BICDL1	KLF10	SRGAP2-AS1	OAZ1	AB_CD366	RUBCNL	UACA	BAG1	LINC02605	FUS
	SND1	LITAF	IL6ST	CLIC3	CCDC71L	FLT3LG	COTL1	CASR	NPPC	RPS3	AB_CD93	CYTH3	LINC00944	DENND2D	AKAP5	KIF26B	CD27	TPM4	ZNF101	GBP1	GBP3	AB_HLA-DR	AB_CD99	ENO1	CD2	AB_CD86	FAM53C	EML2	LMO4	NME2	C1QBP	FAM83D	RNASEH2A	CCND3	PALM2-AKAP2	KIF24	HN1	SNRPF	GIMAP4	SFRP4	EFHD2	PSMB11	NEURL3	HK3	MT-CO3	LTBP1	PTPRF	AB_HLA_F	ETF1
	FKBP2	LINC01871	MEOX1	RAMP1	CDKN2A	TMEM156	MSN	LSP1	CCDC57	CD27	MIR3142HG	CA3-AS1	CD96	AB_CD45RA	CTSC	C12orf57	IL21-AS1	SNX2	TMF1	PRDX2	HSPA1L	ATXN1	PADI4	PLSCR1	RBPJ	NACA	CCDC59	NDUFA4	DDX3X	CCR3	HNRNPA1	CDC25B	BIRC5	PTPN4	GSDMD	BRCA1	PDIA6	NDUFS6	SSR4	PFN1	PPP1CB	NINJ1	PEAR1	AB_CD1d	FCGR2B	PLTP	SEPT4	RBP2	MAPK1IP1L
	NCF4	AB_CD99	FBLN7	ZMAT4	SEC11C	IL17RE	SLC27A2	PKMYT1	PABPC1	CD7	SOD1	PARP8	TRG-AS1	HLA-DRB5	CD151	RPS8	INSM1	NPDC1	HIST1H1E	CSK	FAM13A	DBI	CR2	CLEC2B	PBX4	FTH1	PNPLA8	LST1	CSF1	SSR4	AB_CD27-1	DCTN3	SPC24	HLA-DPA1	PSMA5	TMEM106C	REC8	WARS	HNRNPLL	MYBL2	LINC01602	NFKBIA	IGF2BP3	HMOX1	MT-ND4	AB_CD11b-2	SLC6A8	AB_Iglightchaink	CSNK1D
	CISD2	SAMD3	AB_CD49d	PLCG2	ADGRB2	RPS19	MXRA7	PLD1	IL7R	MMP28	SMCHD1	DBN1	HNRNPLL	AB_CD122	PTPN11	RPL6	TMEM70	ENO1	DCTPP1	FLNA	PMAIP1	SERF2	GYPC	PLAAT4	IL18R1	EIF1	PGAP1	ISCU	TNIP3	CTSH	TNRC6C-AS1	POLQ	NEIL3	SELPLG	TRIM5	HIST1H2BF	SUMO2	POLD2	LBH	MRPS6	SDCBP	ZFP36L2	F2RL3	AB_CD9	MT-ND2	DAB2	FAM166A	IGHE	CEBPB
	S100A4	TGFBR3	NDUFA12	GCSAM	IL10RA	PBXIP1	ATP5MG	MSC-AS1	MAML2	RPL28	DNAH8	ELK3	LINC02084	CD3E	PHTF2	CUL3	ANKRD34B	PRDM1	ALOX5	PSMA5	MOB4	AB_CD275-1	ERG	TMEM171	MYO1B	RPS14	RBM8A	ATP5G3	SEMA7A	LOXL1	LINC01138	LSM5	H2AFY	SCP2	PGAP1	LMNB1	CALM3	SSB	GEM	PPP1R12B	TMEM67	AB_CD8	AB_CD31	IGKV1-9	GUCY2C	S100A13	ALDH1L1	TRBJ1-1	EMD
	HSPA5	AB_Folate	NECAP2	MAPK1	RGS11	GNA15	SEPT11	RRM1	SNRK	RCAN3	SLC16A10	YWHAQ	S1PR4	KIF21A	GALM	FGFR1	KCNJ2-AS1	GNA15	RAN	AGTRAP	RSRC2	GALM	AB_TCR-V-9	TPM4	EPC1	AB_CD141	SPTY2D1	EFHD2	SLAMF7	E2F2	TOMM20	GGH	ZGRF1	BHLHE40	APOL2	KIF20A	VOPP1	SNHG3	PRDX5	RCSD1	SYNE2	PRDM1	KIAA1211	DMXL2	SPI1	ITGB5	MPP1	IGLV9-49	DDX3X
	GCNT1	RRAS2	H2AJ	IRF8	CDH1	MDFIC	FKBP11	CES1	SERINC5	LINC01550	LSP1	NEO1	RHOC	PDCD4	IL2RG	ZNF295-AS1	CCDC6	CTSC	NPM1	PYCARD	MAP1LC3B	H2AFJ	GNAS	ID2	FHL1	CALM2	ARL5B	NMB	RAB27A	PHLDA1	NCMAP-DT	HNRNPA2B1	KIAA1524	CD3D	ZCCHC2	DEPDC1B	NEIL3	RPL8	BCL3	COTL1	AB_CD194	SUB1	NFE2	MT-ND2	MT-CO2	SCARA5	SOD3	S100A8	DNAJB9
	AB_CD47	KLRK1	CTSB	AB_CD57	LINC01934	FXYD5	CD244	FLNA	ARMCX1	RETREG1	UTS2	TNFSF14	MRPL10	LPCAT1	CCR1	AKR1C3	AGFG1	AB_CD70	TXNIP	PTTG1	MLKL	SAT1	PCLO	TMEM98	CAVIN1	EPHB6	CEMIP2	ANP32E	IL13	CALHM2	AB_CD4-2	CALM2	OIP5	GAB3	GNG5	CDKN2C	AB_CD195	CCDC86	CD59	GFOD1	PERP	H3C2	MAGI2-AS3	HIF1A	MT-CYB	NOTCH3	ANKRD2	CLDN14	HNRNPA0
	LDHB	GPR65	PTPRC	GNPTAB	SCHIP1	PLCB1	DHRS7	MREG	RPS9	CELA1	S100A4	RAB18	AB_CD150	PATL2	NAMPT	TNFSF8	TUBA3E	SPOCK2	NDUFV2	SEC61G	MOB3A	SASH3	AIF1	LY6E	OLAH	RPS16	MLF1	PSMA7	TIPARP	SIT1	C11orf1	HDGF	ANP32B	CACNA2D2	HELB	H2AFV	LMNB1	CHCHD2	HSP90B1	ITGAE	AKAP13	CD9	RGS6	USP15	LINC02259	CNN3	CXXC5-AS1	AB_LOX-1	CRYBG1
	TMEM258	AB_CD45-2	ITGB2-AS1	TM6SF1	SSR4	DYNLT3	PRR5	TENM4	RCAN3	LIMD2	GLCCI1	SH2D2A	DNAJB1	CD27	ID2	ADSL	NHS	PGAM1	PAICS	COX7B	DBP	HINT2	DNAJC12	DBI	ARID5A	AB_CD203c	NCL	HAPLN3	CD40LG	YWHAB	AB_CD68	TICRR	CEP55	MSN	S100A11	CENPN	GSTK1	FBL	BCAT1	EOMES	ETS1	NFIL3	SEC14L5	FCGR1A	UGT2B17	COX7A1	ITGA9-AS1	POLR2J3-1	ZDBF2
	GNAQ	HLA-B	LAPTM5	SKAP2	CMTM6	IL2RA	TBCD	BAK1	NOG	IGF1R	TRBC2	FLT4	KIF2A	SLC4A4	CD63	LGMN	LRRC8D	F2R	AB_CD7	COPE	AHR	AIM2	AB_CD42b	MZB1	CD226	ANAPC16	UBB	CCL20	RBKS	RGS19	RSL1D1	AB_CD61	CDK4	LINC01871	MOV10	MTFR2	SQRDL	STOML2	LSP1	GYPC	MPC2	H1-1	AB_CD61	TSPO	STAP1	STEAP4	IGKV3D-7	AB_B7-H4	ZBTB10
	SERP1	AB_CD142	DEK	IFITM1	SOX4	RPL14	SPNS3	LINC01871	FCMR	CDCA7L	LINC00519	COL5A1	DNAJC1	NUCB2	HMHB1	H1FX	C16orf45	ATOX1	AB_CD48	COX5A	FXR1	POLR1D	GTF2I	ATP5F1C	IRS2	CCNI	HOOK2	CORO1B	GABPB1	COX6A1	SNHG3	TRAIP	FANCG	CALR	AKAP2	APOBEC3B	ANXA2	MRPL13	MAP1LC3A	ARPC2	HSPA5	ITGA6-AS1	SNN	LILRA2	BHLHE41	PDGFRA	TARS1	IGKV5-2	CEBPZ
	FNIP2	ITGAX	SEPT6	SERPINB6	CCR10	FRY-AS1	CCR9	LINC02158	SERPINF1	ATM	CASK	TTC39C	TNFAIP3	MYL12B	NEAT1	MT-CYB	SMS	MPO	HSPA8	SASH3	RANGAP1	MPG	DCP2	CACYBP	ANK3	PIK3IP1	HSP90AA1	PHPT1	NEAT1	ARHGAP15	DANCR	AB_CD278	SLC29A1	AB_CD11a	C4orf3	ERCC6L	PARK7	GAPDH	DGKI	RAB37	MED25	C11orf86	AB_CD164	ALDH2	MZB1	CYP1B1	ATP5L2	AB_CD252	ICOS
	CLECL1	AB_CD81	GIMAP7	KLRF2	TBXAS1	TSPAN18	NUCB2	TRIB2	ZCCHC12	RPS18	AB_CD28	IL26	AB_CD4-2	PAXX	TSPO	CSK	TSPAN5	GNAI2	AREG	TMA7	SELENOK	LCK	MYB	CCDC167	EVI2B	ISG20	CCNT1	PSMB3	CBLB	HLA-A	AB_CD127	TACC3	GINS4	PTGDR	TRIM14	BRCA2	SLF1	CNBP	CALR	AB_CD72	LDHA	FLNA	AB_CD274	CDA	CPNE5	MMP7	GZMH	AB_CD370	EIF5
	DUSP23	ADRB2	SELL	SYK	CFAP36	SRPX	ADGRG3	PSMA4	CTSW	FAU	MAP3K1	LINC00892	LINC00623	CLDND1	WSB2	ACTG1	KDR	FLNA	RGS16	PSMA4	BPGM	CCR3	SMPD3	PSMB3	GIMAP4	SELENOM	GADD45A	SLC28A3	ZNF683	BLVRA	EML2-AS1	RAN	KNTC1	AGPAT4	APOL1	CEP55	ARPC2	AB_CD278	CD4	HSPB11	SH3BGRL3	MXD4	PARVB	SYK	RASSF6	IGFBP4	HCG21	AB_CD19	PNPLA8
	SSR3	HLA-A	SMC4	AB_CD271	FSCN1	RBMS1	USMG5	E2F2	AP1M1	RPS10	SLC12A6	CKLF	ITGB1	MCOLN2	GNAS	DGKA	FKBP5	YWHAH	FHIT	PSMB2	FOSB	HMGA1	FES	RAB38	MALT1	RPS23	LEPROTL1	NDUFB2	GABPB1-IT1	LSP1	AB_CD324	MND1	SLC43A3	H3-3A	IRF2	TACC3	TMSB4X	PSAT1	STX11	HLA-DRA	UFC1	FAM181B	MSRB3	AB_TCR-V-24-J-18	SHD	COL15A1	PHYHIP	IGHV7-4-1	SFPQ
	ST6GALNAC1	TBX21	DRAIC	TPST2	GNA15	ARL4A	IFI27L2	REEP3	SMAP2	COL18A1	HTATIP2	GLRX	CD226	PIK3AP1	D2HGDH	XXYLT1	VSIR	PARP1	TRAK2	TWF2	UGP2	CD27	LTB	SIT1	OSBPL8	CNBP	AB_abTCR	LINC02073	BIRC3	SEC11C	AB_CD115	ANP32B	SLC25A5	ANXA4	MMP3	AURKA	MPST	MRPS12	PSMB2	RNF19A	SBDS	IGHM	MPP1	AB_CD112	LRFN5	PHACTR3	AB_CD172a	AB_DR3_TRAMP	BTG3
	AB_CD171	H3F3B	ELOVL5	CXCR2	RHBDD2	RHBDL1	CLEC2B	HSP90AA1	GABPB1-AS1	GIMAP4	CTSA	RBL2	DYNLT3	TPRG1	ANTXR2	ST8SIA1	ATP5G2	TRIB2	HNRNPAB	MYH9	SUGT1	FAM126A	CUX1	AB_CD195	TP53BP2	AB_CD90	BCLAF1	CHN1	ADGRE5	AES	ATP5PO	AB_CD9	PXMP2	PTGDS	KPNB1	HIST1H2AB	ATP5F1C	MYDGF	TNS3	LRBA	CORO7	ATCAY	PDE5A	SF1	RASGRF1	TMEM45A	HIST2H4A	MISP	MIDN
	AB_CD46	AB_CD56-2	CD37	STYK1	NFKBIA	IER5	ARPC3	CDC20	RPLP0	PIM2	EZR	LATS2	SH3BP5	MRPL10	IL6ST	SH3TC1	FBXO27	CCNA1	RASGRP1	LINC00892	CDKN1A	YWHAE	HCG22	HMGN2	RORA	AB_CD1d	RGS2	PSMA2	ZBED2	CAST	AB_CD243	H2AC13	GGCT	CCL4	PARP11	CCDC150	OAZ1	PAK1IP1	ENO1	CLIC1	WEE1	IGLV1-36	CNN1	SARAF	KCNH8	TFPI	H1-3	AB_CD90	NFKBIZ
	HSP90B1	AB_CD19	PIM2	PLAAT3	LINC01123	USP46	GFPT2	FAM111B	COX7C	PRMT2	POU2F2	GALC	TMEM109	SLAMF6	TMSB10	CLEC11A	NDUFV2	CNN2	LTA	GUK1	HNRNPU	SLC25A6	VIPR2	KLRK1	DPP4	ISCU	AB_CD8	FAM78B	SLC38A2	ST6GALNAC1	AB_CD199	SPTBN1	TFDP1	TSPAN32	SUB1	FEN1	C19orf43	EIF2S2	ARPC1B	RNASEH2B	ARHGDIA	C9orf50	LHFPL6	ASGR1	SIGLEC14	CFI	PLEK	AB_CD269	NR3C1
	PLPP5	AB_CD303	NAP1L4	G6PD	LIF	IL32	GUK1	GNA15	MGAT4A	LEPROTL1	AKIP1	LAPTM5	JAK1	AKNA	SYNJ2	FGF13	RAB11FIP1	MYO1G	RASA3	TPI1	MBOAT7	CKAP2	TCF4	CDKN2A	TMEM243	CD37	HERPUD2	STAC	VMP1	LY6E	NME2	BORA	POLA1	THEMIS2	TDRD7	EME1	CCDC167	C19orf24	PTPRCAP	TPP1	PRNP	AB_HLA_A_B_C	AB_CD69	AB_IgG1isotypctrl	ROCR	IGFBP6	FAM41C	AB_CD257	NXT1
	SAMSN1	AB_CD200	HMGB1	FAM173A	PLIN2	MAP3K1	APBA2	MAP3K4	STK17A	EIF3H	SUMO2	RPLP1	AHNAK	CLIC1	MYDGF	C11orf96	SH3BGRL2	TOX2	DGKA	NDUFS6	BAG2	CHMP2A	DDAH2	PSMB9	SELENOM	SMDT1	AB_CD27-2	CYP7B1	PAQR3	CYB561	PHB2	MZT1	HNRNPF	TRGV2	AZI2	GSG2	GZMK	TUFM	LIMD2	AB_CD13	KDM2A	SLC28A3	TNS1	PRAM1	JADE3	AGR2	ASB9	AB_CX3CR1	ID2
	IRX3	ADGRG5	USP46	KLRC1	IGHV7-81	ITM2B	CHST12	CDKN2A	CAMK4	OXNAD1	EPB41	ILF3-AS1	TUBA4A	PRR5L	ITGA2	MTUS1	MAL	CMTM6	HIST1H1C	IDH2	CCNH	RACK1	ITGA6	RPS27L	TMEM2	AB_CD81	REL	HSP90B1	AB_CD45RO	CALM2	AB_C5L2	RDM1	FABP5	CD247	DNAJA1	HIST2H2AB	PRDX1	RPL35	RNASEK	GIHCG	H3F3B	PHF19	PCSK6	CTSZ	HLA-G	AB_Podoplanin	ANKRD34B	AB_CD154	AB_CD18
	CRIP2	ID2	SUMO1	MBP	DNAJC2	GPR15	ATP1B1	AB_CD123	CTSA	PDK1	PTTG1	ABHD15	CD4	TMSB4X	AB_CD278	NAP1L4	PMP22	SLCO4A1	AES	NEDD8	PELI1	SQOR	AB_CD49b	CFL1	IFITM1	AB_CLEC12A	ZBTB10	MIIP	DUSP2	TWF2	COX7A2L	C14orf80	CBX5	PLAAT4	CTSS	PLK4	PTPRN2	POMP	ZNF79	AB_CD61	SNHG16	ADAM32	MARCH2	AB_CD109	SMIM14	AB_CD141	AB_CD47	MT-ND3	YWHAZ
	AB_CD205	KIR3DL1	CD5	AB_CD305	COL9A2	ZC2HC1A	GRAP2	BZW1	ZNF22	TOMM7	BTG3	RGS2	EDARADD	CYTOR	HLA-C	CCDC50	PVALB	LHX1	GRASP	TESC	PCBD1	GPR155	DAAM1	JPT1	UBASH3B	AB_CD354	CHD1	LINC01934	CEMIP2	IL22	C6orf48	H3C8	POLD1	PTPN12	AIM2	WDR62	CRNDE	TIMM8B	IRX3	AB_CD205	NFKB1	LINC01762	SELP	AB_CD209	LCN8	CTSK	FMO1	MT-CO3	SGK1
	MGST3	TPST2	TRBC2	STARD3NL	PDE4A	EMP3	DRAP1	CITED2	SNED1	NET1	CDKN1B	CASP1	NT5E	CCR5	SYTL2	ETS1	DBI	RABGAP1L	KANK1	TBCB	HIST1H2BD	SUMO1	SEPT6	GMFG	POLR1E	RPL10	ARF4	RNF207	KMT2E-AS1	DANCR	FAM226B	CDCA5	MTFR2	RAP2A	GPR155	NUF2	HMGB3	IMP4	PYCARD	GTSF1L	BCLAF1	SLC25A5-AS1	MFSD2B	HIST1H1D	LPAR3	CCL21	TMEM125	SDC1	PLK3
	WDR86	CTBP2	CPNE7	RRAS2	AB_KLRG1_MAFA	SLAMF1	ABI3	STMN1	FCGBP	AB_CD93	CD70	AB_CD11a	HOXB2	MBP	SSR4	BBC3	HACD1	AIM2	PCSK1N	AP2S1	RAB11FIP1	HMGB3	AB_CD73	PPP1R18	LPAR2	RPL27A	RNF125	BIRC3	IL17A	TMBIM1	TRIM52-AS1	NCAPG2	KIFC1	TFDP2	CXCL10	TCF19	CCDC50	NOP56	PSMB9	CD28	TEDC1	DUSP5	CCDC173	SLC7A7	PKHD1L1	ADAMTS5	COL6A6	IGHV2-70D	DYNLT1
	CYLD	EPHX4	AB_CD27-1	TMEM2	RPS4Y1	CISH	AGTRAP	PPIA	SLC7A3	IL6R	NABP1	S1PR5	AB_CD209	STOM	ZC3H12C	CEBPA	IGFLR1	AB_CD54	SNHG15	ARHGDIA	PRMT9	MCOLN2	MZB1	CNN2	SMIM3	AB_CD4-1	RGPD5	LRG1	GABPB1-AS1	PRNP	EIF3G	ASF1B	TP73	ANXA6	ERAP2	INCENP	IL32	SNU13	AIF1	AB_CD42b	CYTH1	PRR11	OST4	DDX21	ZNF608	DPYSL3	LINC-ROR	DDX17	CHMP1B
	C9orf135	NCAM1	NAB1	TFCP2L1	ZC3HAV1L	AB_CD58	PAXX	MATN2	RPL10A	RPL7A	MYO5C	AB_CD146	KLF3	CNR2	GUSB	TUBA3D	RBMS3	CHAD	MXI1	GNAI2	KLHL25	PPP1R18	SPINT2	NOP10	WAKMAR2	PNRC1	MZF1-AS1	PDCD5	AB_CD5	CARD19	GPX4	TBXT	SMC1A	GNG2	TREX1	CCDC34	TYMP	AHSA1	EID1	C6orf141	CFAP126	PREX2	CD151	LILRB3	P2RY6	MEIS2	TWIST1	IGHV1-58	SPTY2D1
	PRKG1	AB_CD62P	TRIM8	LINC02446	TXN	AB_CD44-2	TMEM200A	PPP1CA	AB_CD62L	PRKCA	ACTG2	PNP	MAP7D3	CBLB	TMEM70	SGPP2	FAM107B	GPR25	NEFL	ATP5PB	SRSF3	TROAP	ARPP21	SAMD3	TOMM7	AB_CD307d	TSPYL4	ARNTL2	GPR171	COTL1	AB_Galectin-9	GSG2	FANCA	C11orf21	ERICH3	HIST1H1A	CFL1	CYCS	LIMS1	NMU	ESYT2	APOBEC3H	AR	ZEB2	KRT5	AB_CD206	MTSS1L	IGHV3OR15-7	RNMT
	DEGS1	AB_Siglec-8	DUSP5	LILRB1	ADAM19	AB_CD96	CD226	TNFRSF25	AB_CD93	CHMP7	ETS1	AB_CD45RB	TGIF1	IDH2	MFHAS1	GABARAP	DGKH	TYMP	FGFR1OP2	PGAM1	CCT5	GBP5	AB_CD164	PFN1	EVL	RPL18	HSPA8	S100A4	LGALS1	UBXN11	MZT2A	HP1BP3	PAICS	PPP2R2B	COX5A	C1QL1	CTSH	PPIB	PPM1G	WIPF1	UBE2S	LEUTX	TST	S100A11	C12orf74	CHGA	LIMD1-AS1	AB_Podocalyxin	TUBB2A
	DHRS7	AB_CD48	ACP5	AB_gdTCR	CASQ1	CACNA2D4	MPST	AB_CD357	ZBED3	LMO7	TIAM1	CFH	DHRS3	C14orf2	C4orf48	CD3D	FCMR	PTPN2	PPP1R14B	PSMB1	MKNK2	NDUFV2	PRKCH	HMGB1	DNAJB9	OST4	RBM39	LCP1	KDM6B	A1BG	IGLC1	LBR	PPIA	NME8	CMTR1	HIST1H4I	PSMB10	ERH	HAPLN3	DCLRE1A	ORAI1	DINOL	HGD	KCTD12	SCRN1	C1QB	NR6A1	AB_CD137L	IER5
	CAVIN1	COL6A2	IFITM1	PITPNC1	LZTFL1	REEP5	CD3D	CD59	SEPT6	RPL6	AB_CD46	AB_CD119	ACE	PSME1	SLAMF1	TBC1D4	ARHGAP24	CD3D	FAM241A	LSP1	ZFAND5	PPM1G	SELENOP	PRDX3	MAP3K5	PTGES3	STK19	TMSB10	TNFRSF1B	S1PR4	AB_CD360	GINS1	NSD2	CD53	GBP3	C16orf59	BLVRA	PARK7	SH2D2A	YWHAH	PCSK1N	REG1A	TAGLN2	HLA-DRB1	MT-ND4L	RAB13	DPEP1	AB_CD366	ARID5B
	TMED10	DDAH2	MIS18BP1	LIMK1	ERO1A	ABCB1	MYL12B	C15orf53	RETREG1	SERINC5	H3F3A	LCP1	PTPN4	NIN	DNPH1	NAB1	SLC9A7	ICOS	TLR1	RNF167	LGALS1	EIF3F	PITPNC1	HMGB3	GIMAP5	AB_CD66b	RASGEF1B	ENTPD1	AB_HLA_A_B_C	RFPL2	ERP29	MYBL2	C21orf58	FUT11	ECE1	ORC6	GBP4	RBM8A	PTPN3	AB_Rat-IgG1-1	GNAI3	LRRC26	AB_CD192	AB_CD307e	SNX22	THY1	LINC01644	IGLV2-18	SPOCK2
	AR	GZMB	CMTM8	SEPT7	TP53I3	AB_CD146	FAM173A	PPY	RIPOR2	GYPC	LINC02694	ATP5O	CD82	GABARAPL2	SIPA1L1	ID3	LINC02099	ZC3H12D	KLF7	SRP14	DUSP4	COX6B1	ZNF135	REEP5	CD5	RPL5	EZR	GADD45G	SLC20A1	SEPTIN10	TTC28-AS1	BRCA2	PHGDH	AB_CD319	EVL	H2AZ1	SEM1	LSM7	NPDC1	KCNN4	RRP12	IL17F	GSN	AB_CD207	SDR16C5	APOC1	TOPORS-AS1	IGLV5-48	GTF2B
	LINC01215	AB_CD158e1	FAM160B1	AB_CD54	CHST11	HNRNPUL1	ARRB2	PEPD	SNN	ANP32B	TULP4	ZFP36L1	SLF1	LINC00384	PIGT	CPM	CTSB	ACTN4	CLUAP1	SELENOH	KCNA3	FAS	SIPA1L2	IRF4	TIFA	HINT1	NUP58	SQLE	PTPN7	PSME1	DPH5	EMC9	STIL	CXCR1	DYNLT1	MCM10	LIMD2	TUBB3	LY6E	CNIH1	CRY1	METRNL	TIMP1	RBP7	CDH22	GALNT15	LRP4-AS1	AB_Podoplanin	PDCL3
	LSR	ARL4C	SPOCK2	TMEM178A	RBM47	PI16	GLIPR1	AB_CD223	CEP41	AB_CD62L	AB_CD59	CTSA	GALM	HERPUD1	CD247	BTLA	SFXN1	EPSTI1	IRF4	NOP10	CYTOR	JPT1	YBX1	MRPL28	LRRC8D	AB_CD204	GABARAPL1	ATP5MC3	PDCD1	ZNF365	LRRC75A	ARHGAP11B	RAN	PTP4A2	TGM1	DHFR	TMEM2	NOL7	TUBB6	ID3	PTGES3	AB_CD45RA	TNNI3	PTPRE	GRK3	HTRA3	ST3GAL6-AS1	IGLV7-43	POLR3E
	SEC61A1	SEPT7	KSR2	HDGFL3	CCS	MCAM	TESC	SLC6A3	IMPDH2	TESPA1	OAS1	KDSR	PIK3R1	CALM1	SEC11A	SLC25A46	BASP1	DBI	IKZF1	ATP5F1B	MALAT1	ACTR3	FAM227A	ARPC2	CD6	PPDPF	AMD1	APRT	SERPINB9	AB_CD49b	AB_CD73	DEK	SNRPB	TMCC3	C1GALT1	CDCA4	YWHAQ	HSPH1	TLL1	CAST	MTSS1	GAL	HIST1H4H	C1QB	MT-ND3	CAV1	LINC00969	AB_CD307d	CTH
	RPLP0	COL13A1	SUSD3	TLE1	PSMC2	SSR3	SYTL2	LINC00605	ITM2C	DGKA	UBC	TBC1D31	FKBP11	DNAJC1	TMEM59	CNIH3	ACSBG1	MZB1	ITK	POLR2L	DGKE	OPTN	P2RX5	GALM	RPS27	MYL12B	TOPORS	GOT2	PLAAT3	STING1	SERP1	GEN1	TOPBP1	AGAP1	OGFR	CARHSP1	APOBEC3B	METTL1	MAL	LAT	TMX4	DUSP2	LGALSL	SRSF10	NCF1	LCN2	LINC02384	IGLVI-70	AB_CD44-1
	TM4SF5	PTPN6	FBXL8	HOXA10	MT-CO1	ZNRF1	PYCARD	PFN1	KLF2	TMEM243	SIRPG	CAP2	NCALD	C19orf43	ICAM3	HPCAL1	HIPK2	SH3BGRL3	MTHFD2	PSMC5	SPATS2L	PARK7	CR1	BAX	UNG	RPS17	AB_CD28	LINC02498	STIL	RHOA	AB_CD370	DDX39A	PLK4	RHOA	MVP	TYMSOS	HOPX	GSTP1	ALDOA	SRGN	SMAD7	AB_CD244	RUFY1	MT-ND4	LINC01602	PLPP3	AB_MERTK	TFF2	EIF4A1
	DNAJB9	FKBP11	CMTM7	LGALS9C	HLA-C	CFAP36	CD53	ARPC1B	RPL32	ST13	FAM19A2	MGAT4A	CNBP	VNN2	NR3C1	FOXN2	YWHAQ	DTHD1	AB_CD4-1	MYO1G	IFRD1	PPP1CC	AB_CD41	GIMAP4	SLAMF6	AB_CD123	ABLIM1	PSMB1	CTSC	MYADM	CDC42-IT1	TPM4	DTYMK	DHRS7	UTRN	H1-1	ZBTB32	STIP1	NOP58	ALCAM	MED31	MIDN	AB_HLA_A_B_C	AB_CD254	RAB31	ARHGAP28	ZNF90	IGKV2D-40	TP53INP2
	LMO4	SEPTIN7	SLC25A5	LGALS1	ATF7IP2	NOSIP	PRDX6	CEP57	APEX1	RASGRP2	TRBC1	AB_CD81	B4GALT1	IL2RB	TOX2	LINC01102	CHRNA6	NAMPT	OSM	NDUFB7	CYTIP	CD74	NT5E	CTSD	EMB	LEPROTL1	CALM1	PSMD8	YES1	CD40LG	LINC02591	H2AC14	STRIP2	FGL2	HM13	HIST1H2BI	MIR181A1HG	EIF2S1	PPP1CA	GBP2	AB_CD49a	CENPN	TSPAN9	RBM39	ESPNL	DEFB1	PLA2G16	SCNN1B	CXCL16
	SPCS2	TFCP2L1	PHEX	SH2D2A	COTL1	TPT1	DRAXIN	RGS6	ECRG4	RPS20	DOK2	DAB2IP	FGFR1OP2	PIP4K2A	METRNL	TNFAIP8	LRMP	TMSB4X	STX2	HCLS1	STK17A	CHCHD5	BTBD3	SH3RF2	LGALS3BP	ATP5MC2	FOSL2	MFSD10	ISG20L2	BATF	EIF2S3	FANCI	FOXM1	B3GAT1	ELF1	H1-5	LINC00892	AIMP2	DNM2	FASLG	SQSTM1	CDKN1A	MAOB	SLC8A1	USP6NL	NR2F2	GLRX5	MT-CYB	AP3M2
	BMP2	AB_Integrin-7	B2M	MCTP2	IGKV6D-21	AB_CD45RO	PLA2G16	EML1	ITGA6	KLF3	CALM3	CACNA2D4	RPS3	ARAP2	SAP30	FRMD4A	SIPA1L2	MYO5A	IMMT	GSTP1	ARRDC3	RAB37	CCDC198	IL2RB	ALOX5AP	AB_CD184	ELF1	PHB	PLEK	TUBA1C	RCAN3AS	UBALD2	BARD1	AB_CD49d	CD48	CDC25A	CD2	RPF2	ARL3	AB_Siglec-8	GAPDH	SGO1	RAB27B	HLA-DRB5	TLR7	MT-ATP6	TMOD1	AB_CD303	SERTAD1
	ARHGAP5	ABHD17A	YPEL3	PRDX5	IMPACT	NMU	ATP8A1	TNFSF15	ANKRD26	RPS7	BARD1	ACAA2	AB_CD4-1	ZNF80	EVA1B	SFXN1	NCOA7	CARHSP1	CA5B	TADA3	MAT2A	BIN1	AB_Integrin-7	RBBP8	RPS27A	SUMO2	BZW1	TRIM16	PIF1	CKLF	AB_CD105	BUB3	HMGA1	UCP2	GPBP1	RECQL4	PRKCDBP	EIF1AX	UBE2E3	PTPN14	ARHGEF40	ID2	YWHAH	HLA-DQB1	CD86	RCN3	CMBL	AB_CD112	CYTIP
	TRAT1	AB_CX3CR1	SUMO2	RASSF1	KIF3A	KAT2B	MVB12B	DEK	AB_CCR7	UBA52	SESN3	RGS18	ARHGAP26	RAB9A	SPATS2L	ITPKB	ATP5MC2	CD53	H1FX	ATP5F1C	PLK3	LSP1	SULT1B1	FDXR	STK17B	HMGN2	CKS2	SDF4	SNAPC1	CD44	EPB41L4A-AS1	NUDT1	EME1	PLOD1	IDH2	C17orf53	ATP5F1A	HSP90B1	TRPS1	ARPC5	KLF4	STC2	ANKRD20A4P	FOLR3	CXCL9	KCNE4	OR5H14	IGLV3-22	ZBTB21
	RTN4	PYHIN1	SNX6	NMUR1	IL1A	PAG1	AIF1	ARPC3	TMEM123	CERS6	ACP5	APOL3	GPR65	VIPR2	CRIM1	AP3S1	GRSF1	BLVRA	SINHCAF	ARPC5L	FBXL14	RPL26L1	HMGN1	BTF3	RUNX2	NOP53	ANXA1	TNFSF4	TGIF1	OPTN	RPL36AL	REEP4	MSH2	PRKCB	PRKD2	HIST1H2BB	PSMB3	MRPL51	ITGA2	ANKRD10	IFT57	MIR3659HG	DMTN	CREB5	TEX9	CLUL1	PNPLA1	IGKV6D-21	PLEKHA2
	GRASP	MYBL1	TMEM123	PRKACB	TESPA1	NTRK2	GPR25	ATP5F1C	PDE6G	TAF4B	CCR6	TYROBP	SMIM14	ITGAL	PDE4D	NFIA	LINC00892	TRBC2	DDX5	NUDT1	BST2	MZT2A	CLDN5	SLC25A3	GSTK1	RCBTB2	CITED4	IRF5	CLCA4	ADAM19	AB_Rag-IgG2c	LGALS1	SYCE2	PPP1R18	SQOR	ARHGEF39	ELOVL5	SOD1	LAT	CXCR6	MAPRE2	SRSF3	GLYATL2	STXBP2	COL4A3	SPINK1	CYP4F3	H2AC20	LINC-PINT
	BARX1	PLAAT3	EPSTI1	TBX21	IBTK	MAPK10	RPS24	CREG2	BTF3	AB_CD200	CUL9	SRPX	CHD9	BTN3A2	CREM	VOPP1	FAM43A	SEC11A	UCP2	USMG5	DUSP5	PPIA	RAC2	PSMA5	CCR2	RPL12	NFKBIA	ILF2	TRBC2	SERF2	TMEM238	ERCC6L	MMS22L	F2R	PI4K2B	DNAJC9	ATP5C1	PRDX4	HLA-DRB1	SUB1	AMD1	HSPE1	CD68	AB_gdTCR	STX7	CCL2	RNF10	RESF1	IFNGR1
[truncated: 3 more columns]

## Sheet: S3 - Gene-set enrichment
Table S3. Gene-set enrichment. The “GO_Enrichment” tab includes the top 10 associated gene sets for each cGEP including the GEP name, gene-set name, fisher exact test odds ratio, and P-value. The subsequent tabs include the same information but for enrichment tests for gene sets defined from a dataset that polarized T cells for either 16 hours (16h) or 5 days (5d) starting from either naive (TN) …
GO Enrichment
	GEP	Geneset	OR	P
	BCL2-Survival	GOBP_POSITIVE_REGULATION_OF_LEUKOCYTE_CELL_CELL_ADHESION	8.11972	3.42864e-10
	BCL2-Survival	GOBP_POSITIVE_REGULATION_OF_CELL_CELL_ADHESION	7.18061	6.83488e-10
	BCL2-Survival	GOBP_LEUKOCYTE_CELL_CELL_ADHESION	6.30699	7.09224e-10
	BCL2-Survival	GOBP_NEGATIVE_REGULATION_OF_RESPONSE_TO_STIMULUS	3.27331	1.31945e-09
	BCL2-Survival	GOBP_POSITIVE_REGULATION_OF_MULTICELLULAR_ORGANISMAL_PROCESS	3.39954	1.61276e-09
	BCL2-Survival	GOBP_POSITIVE_REGULATION_OF_GENE_EXPRESSION	3.71392	1.74899e-09
	BCL2-Survival	GOBP_REGULATION_OF_CELL_CELL_ADHESION	5.47373	3.0004e-09
	BCL2-Survival	GOBP_IMMUNE_SYSTEM_DEVELOPMENT	3.82023	4.17412e-09
	BCL2-Survival	GOBP_RESPONSE_TO_HORMONE	4.08877	5.15608e-09
	BCL2-Survival	GOBP_REGULATION_OF_CELL_DIFFERENTIATION	3.21186	6.8049e-09
	CCR10-Migration	GOCC_CELL_SUBSTRATE_JUNCTION	6.8407	2.13871e-10
	CCR10-Migration	GOCC_SECRETORY_GRANULE	4.75193	1.17711e-09
	CCR10-Migration	GOBP_LOCOMOTION	3.4642	2.65753e-09
	CCR10-Migration	GOCC_ANCHORING_JUNCTION	4.579	4.59589e-09
	CCR10-Migration	GOMF_CADHERIN_BINDING	7.04767	7.54026e-09
	CCR10-Migration	GOBP_CELL_MIGRATION	3.61327	8.03193e-09
	CCR10-Migration	GOCC_SECRETORY_VESICLE	4.16535	8.39068e-09
	CCR10-Migration	GOCC_ACTIN_CYTOSKELETON	5.48027	3.83781e-08
	CCR10-Migration	GOMF_CALCIUM_DEPENDENT_PROTEIN_BINDING	15.8407	1.30362e-07
	CCR10-Migration	GOMF_CHEMOKINE_BINDING	29.835	1.76492e-07
	CD4-CM	GOBP_LYMPHOCYTE_ACTIVATION	6.38346	2.80462e-09
	CD4-CM	GOBP_IMMUNE_SYSTEM_DEVELOPMENT	5.19508	6.22805e-08
	CD4-CM	GOBP_T_CELL_ACTIVATION	7.13429	6.57008e-08
	CD4-CM	GOBP_LEUKOCYTE_DIFFERENTIATION	6.52725	1.84597e-07
	CD4-CM	GOBP_CELL_ACTIVATION	4.51667	4.68961e-07
	CD4-CM	GOBP_MONONUCLEAR_CELL_DIFFERENTIATION	7.00871	6.01569e-07
	CD4-CM	GOBP_INTEGRIN_MEDIATED_SIGNALING_PATHWAY	15.6931	7.85e-07
	CD4-CM	GOCC_EXTERNAL_SIDE_OF_PLASMA_MEMBRANE	6.74788	8.79739e-07
	CD4-CM	GOMF_CORECEPTOR_ACTIVITY	27.2314	2.41903e-06
	CD4-CM	GOBP_REGULATION_OF_T_CELL_ACTIVATION	7.18319	3.82126e-06
	CD4-EM	GOBP_LYMPHOCYTE_ACTIVATION	6.49972	4.28737e-13
	CD4-EM	GOBP_REGULATION_OF_IMMUNE_SYSTEM_PROCESS	4.98686	4.57564e-13
	CD4-EM	GOBP_CELL_ACTIVATION	5.22358	6.62664e-12
	CD4-EM	GOBP_REGULATION_OF_LYMPHOCYTE_ACTIVATION	7.38655	8.672e-12
	CD4-EM	GOBP_T_CELL_ACTIVATION	7.43379	2.13741e-11
	CD4-EM	GOBP_IMMUNE_RESPONSE	4.10485	3.16268e-11
	CD4-EM	GOBP_REGULATION_OF_T_CELL_ACTIVATION	8.66634	1.50245e-10
	CD4-EM	GOBP_NEGATIVE_REGULATION_OF_IMMUNE_RESPONSE	13.1659	1.59185e-10
	CD4-EM	GOBP_DEFENSE_RESPONSE	4.09797	2.24289e-10
	CD4-EM	GOBP_NEGATIVE_REGULATION_OF_IMMUNE_SYSTEM_PROCESS	7.70028	2.79478e-10
	CD4-Naive	GOCC_CYTOSOLIC_RIBOSOME	217.09	4.71481e-96
	CD4-Naive	GOBP_CYTOPLASMIC_TRANSLATION	106.74	1.3858e-86
	CD4-Naive	GOMF_STRUCTURAL_CONSTITUENT_OF_RIBOSOME	85.2684	1.3442e-79
	CD4-Naive	GOCC_RIBOSOMAL_SUBUNIT	75.782	1.78569e-78
	CD4-Naive	GOCC_RIBOSOME	61.3389	3.19476e-75
	CD4-Naive	GOBP_PEPTIDE_BIOSYNTHETIC_PROCESS	19.1888	8.46852e-56
	CD4-Naive	GOCC_CYTOSOLIC_LARGE_RIBOSOMAL_SUBUNIT	197.727	1.59986e-55
	CD4-Naive	GOBP_AMIDE_BIOSYNTHETIC_PROCESS	16.3043	1.20556e-52
	CD4-Naive	GOBP_PEPTIDE_METABOLIC_PROCESS	15.0924	2.03062e-49
	CD4-Naive	GOCC_RIBONUCLEOPROTEIN_COMPLEX	16.0046	2.26203e-47
	CD40LG/TXNIP	GOBP_IMMUNE_SYSTEM_DEVELOPMENT	7.90121	4.75768e-27
	CD40LG/TXNIP	GOBP_LEUKOCYTE_DIFFERENTIATION	10.5895	1.41431e-26
	CD40LG/TXNIP	GOBP_MONONUCLEAR_CELL_DIFFERENTIATION	11.7574	2.47594e-25
	CD40LG/TXNIP	GOBP_LYMPHOCYTE_ACTIVATION	7.87652	1.09943e-23
	CD40LG/TXNIP	GOBP_T_CELL_ACTIVATION	9.8753	6.81713e-23
	CD40LG/TXNIP	GOBP_CELL_ACTIVATION	6.48896	1.28087e-22
	CD40LG/TXNIP	GOBP_T_CELL_DIFFERENTIATION	12.9027	1.11581e-19
	CD40LG/TXNIP	GOBP_REGULATION_OF_IMMUNE_SYSTEM_PROCESS	4.99499	2.6783e-18
	CD40LG/TXNIP	GOBP_ALPHA_BETA_T_CELL_ACTIVATION	15.9146	1.1366e-16
	CD40LG/TXNIP	GOBP_POSITIVE_REGULATION_OF_GENE_EXPRESSION	5.20845	1.79829e-16
	CD8-EM	GOBP_IMMUNE_RESPONSE	7.08009	1.16564e-29
	CD8-EM	GOBP_CELL_ACTIVATION	8.09521	1.07045e-26
	CD8-EM	GOBP_POSITIVE_REGULATION_OF_IMMUNE_SYSTEM_PROCESS	8.81338	1.31087e-26
	CD8-EM	GOBP_LEUKOCYTE_MEDIATED_IMMUNITY	12.8151	2.05277e-26
	CD8-EM	GOBP_REGULATION_OF_IMMUNE_SYSTEM_PROCESS	7.10497	2.70366e-26
	CD8-EM	GOBP_IMMUNE_EFFECTOR_PROCESS	10.1133	1.22994e-25
	CD8-EM	GOBP_T_CELL_ACTIVATION	11.7728	3.27734e-25
	CD8-EM	GOBP_LYMPHOCYTE_ACTIVATION	8.92847	1.3271e-24
	CD8-EM	GOBP_LYMPHOCYTE_MEDIATED_IMMUNITY	13.8205	2.76511e-24
	CD8-EM	GOCC_MHC_PROTEIN_COMPLEX	209.018	3.9991e-24
	CD8-Naive	GOCC_CYTOSOLIC_RIBOSOME	20.0233	9.14766e-12
	CD8-Naive	GOCC_CYTOSOLIC_SMALL_RIBOSOMAL_SUBUNIT	39.6291	1.63384e-11
	CD8-Naive	GOBP_CYTOPLASMIC_TRANSLATION	14.3098	6.12966e-11
	CD8-Naive	GOCC_SMALL_RIBOSOMAL_SUBUNIT	24.8611	6.93473e-11
	CD8-Naive	GOCC_RIBOSOME	10.6136	4.59228e-10
	CD8-Naive	GOCC_RIBOSOMAL_SUBUNIT	11.6262	6.53919e-10
	CD8-Naive	GOMF_STRUCTURAL_CONSTITUENT_OF_RIBOSOME	11.7598	2.5279e-09
	CD8-Naive	GOBP_T_CELL_ACTIVATION	5.76817	1.91084e-08
	CD8-Naive	GOBP_LEUKOCYTE_CELL_CELL_ADHESION	6.3869	7.28764e-08
	CD8-Naive	GOBP_MONONUCLEAR_CELL_DIFFERENTIATION	5.93641	7.3142e-08
	CD8-Trm-Like	GOBP_DEFENSE_RESPONSE	5.45437	1.74319e-16
	CD8-Trm-Like	GOCC_SIDE_OF_MEMBRANE	7.9147	1.53818e-15
	CD8-Trm-Like	GOBP_IMMUNE_RESPONSE	4.86183	4.6005e-15
	CD8-Trm-Like	GOCC_EXTERNAL_SIDE_OF_PLASMA_MEMBRANE	9.42951	7.97933e-15
	CD8-Trm-Like	GOBP_REGULATION_OF_NATURAL_KILLER_CELL_MEDIATED_IMMUNITY	43.0723	4.33482e-14
	CD8-Trm-Like	GOBP_REGULATION_OF_IMMUNE_SYSTEM_PROCESS	5.03017	8.83663e-14
	CD8-Trm-Like	GOBP_NATURAL_KILLER_CELL_MEDIATED_IMMUNITY	28.6707	2.07518e-13
	CD8-Trm-Like	GOBP_BIOLOGICAL_PROCESS_INVOLVED_IN_INTERSPECIES_INTERACTION_BETWEEN_ORGANISMS	4.76833	2.32033e-13
	CD8-Trm-Like	GOCC_CELL_SURFACE	5.77369	1.15522e-12
	CD8-Trm-Like	GOBP_REGULATION_OF_RESPONSE_TO_EXTERNAL_STIMULUS	5.68851	1.63681e-12
	CTLA4+/CD38+-Activation	GOBP_REGULATION_OF_IMMUNE_SYSTEM_PROCESS	5.77998	4.68746e-10
	CTLA4+/CD38+-Activation	GOBP_IMMUNE_RESPONSE	4.97568	2.31299e-09
	CTLA4+/CD38+-Activation	GOBP_IMMUNE_EFFECTOR_PROCESS	7.54457	5.19787e-09
	CTLA4+/CD38+-Activation	GOBP_REGULATION_OF_IMMUNE_RESPONSE	6.55643	5.81609e-09
	CTLA4+/CD38+-Activation	GOBP_LYMPHOCYTE_ACTIVATION	6.80571	8.23249e-09
	CTLA4+/CD38+-Activation	GOBP_REGULATION_OF_IMMUNE_EFFECTOR_PROCESS	10.2035	1.38795e-08
	CTLA4+/CD38+-Activation	GOBP_LEUKOCYTE_DIFFERENTIATION	7.93188	2.17735e-08
	CTLA4+/CD38+-Activation	GOBP_B_CELL_ACTIVATION	10.2669	4.8792e-08
	CTLA4+/CD38+-Activation	GOBP_NEGATIVE_REGULATION_OF_LEUKOCYTE_CELL_CELL_ADHESION	18.0575	4.88945e-08
	CTLA4+/CD38+-Activation	GOBP_REGULATION_OF_LEUKOCYTE_PROLIFERATION	11.8249	5.32122e-08
	CellCycle-G2M	GOBP_CELL_DIVISION	57.9687	9.12899e-74
	CellCycle-G2M	GOBP_MITOTIC_CELL_CYCLE	47.383	1.86114e-71
	CellCycle-G2M	GOBP_MITOTIC_CELL_CYCLE_PROCESS	44.294	1.52109e-65
	CellCycle-G2M	GOBP_CELL_CYCLE	35.0156	1.72878e-65
	CellCycle-G2M	GOBP_CELL_CYCLE_PROCESS	33.1949	3.11551e-61
	CellCycle-G2M	GOBP_MITOTIC_NUCLEAR_DIVISION	65.8968	2.50499e-60
	CellCycle-G2M	GOBP_CHROMOSOME_SEGREGATION	59.2127	2.35269e-59
	CellCycle-G2M	GOBP_ORGANELLE_FISSION	44.1698	2.29663e-56
	CellCycle-G2M	GOBP_NUCLEAR_CHROMOSOME_SEGREGATION	58.2087	7.11216e-53
	CellCycle-G2M	GOBP_MITOTIC_SISTER_CHROMATID_SEGREGATION	82.6172	1.60038e-52
	CellCycle-Late-S	GOBP_CELL_CYCLE_PROCESS	24.4089	6.04827e-56
	CellCycle-Late-S	GOBP_MITOTIC_CELL_CYCLE	27.2347	1.5132e-55
	CellCycle-Late-S	GOBP_CELL_CYCLE	20.9216	1.12212e-54
	CellCycle-Late-S	GOBP_MITOTIC_CELL_CYCLE_PROCESS	27.5036	5.73412e-52
	CellCycle-Late-S	GOBP_MITOTIC_NUCLEAR_DIVISION	40.6526	1.82773e-45
	CellCycle-Late-S	GOBP_ORGANELLE_FISSION	29.5576	2.51455e-45
	CellCycle-Late-S	GOBP_CHROMOSOME_SEGREGATION	35.2038	3.511e-43
	CellCycle-Late-S	GOBP_CELL_DIVISION	24.192	4.25484e-43
	CellCycle-Late-S	GOBP_SISTER_CHROMATID_SEGREGATION	45.4533	6.23796e-39
	CellCycle-Late-S	GOBP_NUCLEAR_CHROMOSOME_SEGREGATION	35.8267	8.67742e-39
	CellCycle-S	GOBP_DNA_METABOLIC_PROCESS	27.9752	1.57234e-57
	CellCycle-S	GOBP_DNA_REPLICATION	54.0128	2.55619e-56
	CellCycle-S	GOBP_CELL_CYCLE	17.8137	3.67862e-49
	CellCycle-S	GOBP_DNA_REPAIR	27.69	5.99963e-45
	CellCycle-S	GOBP_DNA_DEPENDENT_DNA_REPLICATION	63.0796	3.28573e-44
	CellCycle-S	GOCC_CHROMOSOME	15.2448	9.40995e-44
	CellCycle-S	GOBP_CELLULAR_RESPONSE_TO_DNA_DAMAGE_STIMULUS	20.9441	1.3834e-43
	CellCycle-S	GOBP_CELL_CYCLE_PROCESS	17.1531	1.54529e-42
	CellCycle-S	GOBP_CHROMOSOME_ORGANIZATION	16.9006	1.08075e-39
	CellCycle-S	GOBP_MITOTIC_CELL_CYCLE	17.2425	6.539e-38
	Cytoskeleton	GOCC_ACTIN_CYTOSKELETON	9.85917	6.92512e-23
	Cytoskeleton	GOCC_ANCHORING_JUNCTION	7.23352	2.61532e-22
	Cytoskeleton	GOCC_CELL_SUBSTRATE_JUNCTION	10.1782	2.96787e-22
	Cytoskeleton	GOMF_ACTIN_BINDING	10.1862	1.00726e-21
	Cytoskeleton	GOBP_ATP_METABOLIC_PROCESS	13.5873	1.57595e-21
	Cytoskeleton	GOBP_ACTIN_FILAMENT_BASED_PROCESS	7.04305	1.05906e-20
	Cytoskeleton	GOCC_INNER_MITOCHONDRIAL_MEMBRANE_PROTEIN_COMPLEX	19.0763	1.94033e-20
	Cytoskeleton	GOMF_CYTOSKELETAL_PROTEIN_BINDING	6.08204	1.66317e-19
	Cytoskeleton	GOBP_GENERATION_OF_PRECURSOR_METABOLITES_AND_ENERGY	8.58774	4.57043e-19
	Cytoskeleton	GOBP_ACTIN_FILAMENT_ORGANIZATION	8.46277	1.92275e-17
	Cytotoxic	GOBP_CELL_ACTIVATION	5.55416	9.40138e-20
	Cytotoxic	GOBP_IMMUNE_RESPONSE	3.94871	5.68739e-16
	Cytotoxic	GOCC_SIDE_OF_MEMBRANE	6.12199	8.58288e-16
	Cytotoxic	GOBP_LEUKOCYTE_MEDIATED_IMMUNITY	7.0933	4.2735e-15
	Cytotoxic	GOBP_IMMUNE_EFFECTOR_PROCESS	5.75	1.12315e-14
	Cytotoxic	GOCC_CELL_SURFACE	4.85652	3.65004e-14
	Cytotoxic	GOBP_BIOLOGICAL_PROCESS_INVOLVED_IN_INTERSPECIES_INTERACTION_BETWEEN_ORGANISMS	3.71531	4.8861e-13
	Cytotoxic	GOBP_POSITIVE_REGULATION_OF_IMMUNE_SYSTEM_PROCESS	4.50992	1.10681e-12
	Cytotoxic	GOBP_LEUKOCYTE_MEDIATED_CYTOTOXICITY	13.4642	1.14336e-12
	Cytotoxic	GOBP_T_CELL_MEDIATED_IMMUNITY	15.0371	1.35518e-12
	Doublet-Bcell	GOBP_B_CELL_ACTIVATION	20.7646	9.46856e-27
	Doublet-Bcell	GOBP_LYMPHOCYTE_ACTIVATION	9.9952	2.18775e-21
	Doublet-Bcell	GOBP_B_CELL_RECEPTOR_SIGNALING_PATHWAY	30.7391	9.43965e-20
	Doublet-Bcell	GOBP_IMMUNE_RESPONSE	6.40154	1.15373e-19
	Doublet-Bcell	GOBP_CELL_ACTIVATION	7.58427	1.44529e-18
	Doublet-Bcell	GOBP_IMMUNE_RESPONSE_REGULATING_CELL_SURFACE_RECEPTOR_SIGNALING_PATHWAY	13.8463	6.60901e-17
	Doublet-Bcell	GOBP_B_CELL_PROLIFERATION	34.7346	2.01436e-16
	Doublet-Bcell	GOBP_REGULATION_OF_B_CELL_ACTIVATION	18.1664	4.21074e-16
	Doublet-Bcell	GOBP_ANTIGEN_RECEPTOR_MEDIATED_SIGNALING_PATHWAY	15.8879	6.67969e-16
	Doublet-Bcell	GOBP_IMMUNE_RESPONSE_REGULATING_SIGNALING_PATHWAY	10.035	2.6398e-15
	Doublet-Fibroblast	GOCC_EXTERNAL_ENCAPSULATING_STRUCTURE	16.0403	7.80317e-91
	Doublet-Fibroblast	GOCC_COLLAGEN_CONTAINING_EXTRACELLULAR_MATRIX	19.6041	2.57855e-90
	Doublet-Fibroblast	GOMF_EXTRACELLULAR_MATRIX_STRUCTURAL_CONSTITUENT	34.6468	3.8511e-66
	Doublet-Fibroblast	GOBP_EXTERNAL_ENCAPSULATING_STRUCTURE_ORGANIZATION	14.1669	7.47658e-50
	Doublet-Fibroblast	GOBP_BIOLOGICAL_ADHESION	4.83152	1.5466e-39
	Doublet-Fibroblast	GOBP_VASCULATURE_DEVELOPMENT	6.68569	9.11259e-39
	Doublet-Fibroblast	GOBP_CELL_MIGRATION	4.75776	3.44067e-38
	Doublet-Fibroblast	GOBP_BLOOD_VESSEL_MORPHOGENESIS	7.0779	6.81883e-37
	Doublet-Fibroblast	GOMF_STRUCTURAL_MOLECULE_ACTIVITY	6.95309	8.38072e-37
	Doublet-Fibroblast	GOBP_CIRCULATORY_SYSTEM_DEVELOPMENT	5.18283	1.178e-35
	Doublet-Myeloid	GOBP_DEFENSE_RESPONSE	5.78699	6.496e-35
	Doublet-Myeloid	GOCC_SECRETORY_GRANULE	7.70638	1.99571e-34
	Doublet-Myeloid	GOBP_IMMUNE_RESPONSE	5.12728	1.12186e-31
	Doublet-Myeloid	GOCC_SECRETORY_VESICLE	6.51	1.24804e-30
	Doublet-Myeloid	GOBP_BIOLOGICAL_PROCESS_INVOLVED_IN_INTERSPECIES_INTERACTION_BETWEEN_ORGANISMS	5.18505	3.07511e-29
	Doublet-Myeloid	GOBP_INFLAMMATORY_RESPONSE	6.85016	5.61706e-27
	Doublet-Myeloid	GOBP_DEFENSE_RESPONSE_TO_OTHER_ORGANISM	5.69955	7.72593e-26
	Doublet-Myeloid	GOBP_REGULATION_OF_IMMUNE_SYSTEM_PROCESS	4.78863	1.33119e-24
	Doublet-Myeloid	GOBP_INNATE_IMMUNE_RESPONSE	5.63196	1.01071e-21
	Doublet-Myeloid	GOBP_MYELOID_LEUKOCYTE_ACTIVATION	11.594	1.25924e-21
	Doublet-Plasmablast	GOCC_IMMUNOGLOBULIN_COMPLEX	701.313	4.7731e-211
	Doublet-Plasmablast	GOMF_ANTIGEN_BINDING	165.268	1.59446e-126
	Doublet-Plasmablast	GOBP_ADAPTIVE_IMMUNE_RESPONSE	46.0925	1.90112e-119
	Doublet-Plasmablast	GOCC_IMMUNOGLOBULIN_COMPLEX_CIRCULATING	483.063	2.50315e-97
	Doublet-Plasmablast	GOMF_IMMUNOGLOBULIN_RECEPTOR_BINDING	392.458	1.80286e-93
	Doublet-Plasmablast	GOBP_PHAGOCYTOSIS_RECOGNITION	180.948	7.09399e-84
	Doublet-Plasmablast	GOBP_B_CELL_RECEPTOR_SIGNALING_PATHWAY	114.012	1.45199e-79
	Doublet-Plasmablast	GOBP_IMMUNE_RESPONSE	17.4228	6.17805e-79
	Doublet-Plasmablast	GOBP_HUMORAL_IMMUNE_RESPONSE_MEDIATED_BY_CIRCULATING_IMMUNOGLOBULIN	117.495	2.6735e-77
	Doublet-Plasmablast	GOBP_COMPLEMENT_ACTIVATION	103.631	3.06833e-75
	Doublet-Platelet	GOBP_HEMOSTASIS	16.2348	5.38309e-22
	Doublet-Platelet	GOCC_PLATELET_ALPHA_GRANULE	30.7671	1.25594e-20
	Doublet-Platelet	GOBP_PLATELET_ACTIVATION	22.3618	4.1432e-20
	Doublet-Platelet	GOBP_WOUND_HEALING	9.55686	3.08742e-18
	Doublet-Platelet	GOBP_REGULATION_OF_BODY_FLUID_LEVELS	9.55014	1.20837e-16
	Doublet-Platelet	GOBP_RESPONSE_TO_WOUNDING	7.4549	5.64147e-16
	Doublet-Platelet	GOCC_SECRETORY_GRANULE	5.34179	2.33877e-13
	Doublet-Platelet	GOCC_SECRETORY_VESICLE	4.79656	1.02591e-12
	Doublet-Platelet	GOCC_PLATELET_ALPHA_GRANULE_LUMEN	22.0173	2.9452e-11
	Doublet-Platelet	GOBP_REGULATION_OF_PLATELET_ACTIVATION	25.8158	5.26311e-10
	Doublet-RBC	GOBP_HYDROGEN_PEROXIDE_CATABOLIC_PROCESS	119.869	2.32544e-15
	Doublet-RBC	GOBP_ERYTHROCYTE_DEVELOPMENT	88.7619	2.13501e-14
	Doublet-RBC	HP_RETICULOCYTOSIS	68.4468	1.56498e-13
	Doublet-RBC	GOBP_ERYTHROCYTE_HOMEOSTASIS	28.2938	2.20848e-13
	Doublet-RBC	HP_PALLOR	25.0602	8.32158e-13
	Doublet-RBC	GOMF_OXYGEN_BINDING	84.1272	8.37544e-13
	Doublet-RBC	GOBP_HYDROGEN_PEROXIDE_METABOLIC_PROCESS	54.4224	9.49064e-13
	Doublet-RBC	GOBP_MYELOID_CELL_HOMEOSTASIS	22.9583	2.16836e-12
	Doublet-RBC	GOBP_MYELOID_CELL_DEVELOPMENT	37.974	1.7097e-11
	Doublet-RBC	HP_ABNORMAL_RETICULOCYTE_MORPHOLOGY	34.6618	3.5899e-11
	Early-Activation	GOMF_UNFOLDED_PROTEIN_BINDING	167.516	1.54422e-09
	Early-Activation	GOMF_RNA_BINDING	53.1302	5.25965e-09
	Early-Activation	GOBP_DNA_METABOLIC_PROCESS	27.5192	2.09474e-06
	Early-Activation	GOBP_PROTEIN_FOLDING	62.3957	2.23882e-06
	Early-Activation	GOMF_RIBONUCLEOTIDE_BINDING	18.206	9.69226e-06
	Early-Activation	GOBP_POSITIVE_REGULATION_OF_PROTEIN_LOCALIZATION_TO_NUCLEUS	97.4383	9.77832e-06
	Early-Activation	GOBP_RIBONUCLEOSIDE_TRIPHOSPHATE_METABOLIC_PROCESS	96.2156	1.01421e-05
	Early-Activation	GOMF_PROTEIN_CONTAINING_COMPLEX_BINDING	19.4576	1.39682e-05
	Early-Activation	GOMF_ATP_HYDROLYSIS_ACTIVITY	38.6781	1.40953e-05
	Early-Activation	GOMF_HYDROLASE_ACTIVITY_ACTING_ON_ACID_ANHYDRIDES	24.2348	1.61668e-05
	Exhaustion	GOBP_T_CELL_ACTIVATION	9.01251	2.93509e-24
	Exhaustion	GOBP_LYMPHOCYTE_ACTIVATION	6.40254	2.56978e-21
	Exhaustion	GOBP_CELL_ACTIVATION	5.45618	3.73229e-21
	Exhaustion	GOBP_IMMUNE_RESPONSE	4.29305	3.98796e-20
	Exhaustion	GOBP_REGULATION_OF_T_CELL_ACTIVATION	9.49352	2.54002e-19
	Exhaustion	GOBP_REGULATION_OF_IMMUNE_SYSTEM_PROCESS	4.37895	7.2309e-18
	Exhaustion	GOBP_POSITIVE_REGULATION_OF_IMMUNE_SYSTEM_PROCESS	5.02238	1.77441e-16
	Exhaustion	GOBP_REGULATION_OF_CELL_ACTIVATION	5.68976	5.34225e-16
	Exhaustion	GOBP_T_CELL_PROLIFERATION	11.0972	8.88758e-16
	Exhaustion	GOBP_REGULATION_OF_LYMPHOCYTE_ACTIVATION	6.2818	2.08458e-15
	HLA	GOCC_MHC_PROTEIN_COMPLEX	488.214	2.34552e-30
	HLA	GOMF_MHC_CLASS_II_PROTEIN_COMPLEX_BINDING	263.353	1.7114e-24
	HLA	GOBP_ANTIGEN_PROCESSING_AND_PRESENTATION_OF_EXOGENOUS_ANTIGEN	117.718	2.8889e-24
	HLA	GOBP_ANTIGEN_PROCESSING_AND_PRESENTATION_OF_PEPTIDE_ANTIGEN	85.5772	5.69289e-24
	HLA	GOBP_ANTIGEN_PROCESSING_AND_PRESENTATION_OF_EXOGENOUS_PEPTIDE_ANTIGEN	150.117	6.81654e-24
	HLA	GOBP_ANTIGEN_PROCESSING_AND_PRESENTATION	49.7209	4.45379e-23
	HLA	GOMF_MHC_PROTEIN_COMPLEX_BINDING	144.78	3.78544e-22
	HLA	GOBP_ANTIGEN_PROCESSING_AND_PRESENTATION_OF_EXOGENOUS_PEPTIDE_ANTIGEN_VIA_MHC_CLASS_II	176.318	2.59637e-21
	HLA	GOBP_POSITIVE_REGULATION_OF_LEUKOCYTE_CELL_CELL_ADHESION	23.6012	1.89773e-20
	HLA	GOBP_ANTIGEN_PROCESSING_AND_PRESENTATION_OF_PEPTIDE_OR_POLYSACCHARIDE_ANTIGEN_VIA_MHC_CLASS_II	125.905	5.16824e-20
	HeatShock	GOBP_PROTEIN_FOLDING	27.948	2.25472e-29
	HeatShock	GOBP_CHAPERONE_MEDIATED_PROTEIN_FOLDING	67.5255	1.04669e-28
	HeatShock	GOMF_UNFOLDED_PROTEIN_BINDING	38.4891	1.63412e-25
	HeatShock	GOMF_PROTEIN_FOLDING_CHAPERONE	88.6892	2.21661e-22
	HeatShock	GOBP_RESPONSE_TO_TOPOLOGICALLY_INCORRECT_PROTEIN	23.6125	1.41463e-20
	HeatShock	GOBP_DE_NOVO_PROTEIN_FOLDING	69.9726	1.41626e-18
	HeatShock	GOMF_HEAT_SHOCK_PROTEIN_BINDING	24.3723	3.11492e-17
	HeatShock	GOBP_CHAPERONE_COFACTOR_DEPENDENT_PROTEIN_REFOLDING	79.9534	1.94672e-16
	HeatShock	GOCC_CHAPERONE_COMPLEX	65.3148	2.15775e-14
	HeatShock	GOBP_RESPONSE_TO_TEMPERATURE_STIMULUS	15.8952	1.03124e-13
	ICOS/CD38-Activation	GOBP_PROTON_TRANSMEMBRANE_TRANSPORT	24.3536	1.62307e-14
	ICOS/CD38-Activation	GOBP_REGULATION_OF_ACTIN_FILAMENT_BASED_PROCESS	12.3645	5.72126e-14
	ICOS/CD38-Activation	GOBP_ACTIN_FILAMENT_BASED_PROCESS	8.26094	8.15249e-14
	ICOS/CD38-Activation	GOBP_REGULATION_OF_ACTIN_FILAMENT_ORGANIZATION	14.9127	2.97838e-13
	ICOS/CD38-Activation	GOMF_PROTON_TRANSMEMBRANE_TRANSPORTER_ACTIVITY	24.7846	8.9105e-13
	ICOS/CD38-Activation	GOBP_ACTIN_POLYMERIZATION_OR_DEPOLYMERIZATION	17.2931	1.21617e-12
	ICOS/CD38-Activation	GOBP_REGULATION_OF_ACTIN_FILAMENT_LENGTH	20.1223	1.22883e-12
	ICOS/CD38-Activation	GOBP_ACTIN_FILAMENT_POLYMERIZATION	19.0272	2.36628e-12
	ICOS/CD38-Activation	GOCC_ACTIN_CYTOSKELETON	9.64666	3.49192e-12
	ICOS/CD38-Activation	GOMF_ACTIN_BINDING	10.2992	4.23961e-12
	IEG	GOBP_NEGATIVE_REGULATION_OF_NUCLEOBASE_CONTAINING_COMPOUND_METABOLIC_PROCESS	3.90067	2.22667e-12
	IEG	GOBP_REGULATION_OF_CELL_DEATH	3.73599	5.33443e-12
	IEG	GOBP_POSITIVE_REGULATION_OF_RNA_METABOLIC_PROCESS	3.46358	2.42729e-11
	IEG	GOBP_NEGATIVE_REGULATION_OF_BIOSYNTHETIC_PROCESS	3.59187	2.74515e-11
	IEG	GOBP_PROGRAMMED_CELL_DEATH	3.31334	6.61472e-11
	IEG	GOBP_POSITIVE_REGULATION_OF_NUCLEOBASE_CONTAINING_COMPOUND_METABOLIC_PROCESS	3.2678	7.11042e-11
	IEG	GOBP_CELLULAR_RESPONSE_TO_STRESS	3.28601	8.55872e-11
	IEG	GOBP_POSITIVE_REGULATION_OF_CELL_DEATH	5.15026	3.87538e-10
	IEG	GOBP_CELL_CYCLE	3.1841	9.22123e-10
	IEG	GOCC_CHROMATIN	3.65967	9.46661e-10
	IEG2	GOBP_CELLULAR_RESPONSE_TO_STRESS	3.43878	4.61355e-16
	IEG2	GOBP_NEGATIVE_REGULATION_OF_BIOSYNTHETIC_PROCESS	3.60994	1.32168e-15
	IEG2	GOBP_NEGATIVE_REGULATION_OF_NUCLEOBASE_CONTAINING_COMPOUND_METABOLIC_PROCESS	3.6886	1.97946e-15
	IEG2	GOBP_CYTOKINE_PRODUCTION	4.61381	5.84714e-14
	IEG2	GOBP_PROGRAMMED_CELL_DEATH	3.15217	1.31435e-13
	IEG2	GOBP_REGULATION_OF_CELL_DEATH	3.35803	1.32369e-13
	IEG2	GOBP_REGULATION_OF_RESPONSE_TO_STRESS	3.42481	1.09886e-12
	IEG2	GOBP_POSITIVE_REGULATION_OF_NUCLEOBASE_CONTAINING_COMPOUND_METABOLIC_PROCESS	3.02469	1.13945e-12
	IEG2	GOBP_POSITIVE_REGULATION_OF_RNA_METABOLIC_PROCESS	3.06512	2.21976e-12
	IEG2	GOBP_RESPONSE_TO_CYTOKINE	3.92083	4.14902e-12
	IL10/IL19-Secretion	GOBP_LEUKOCYTE_CELL_CELL_ADHESION	7.22895	1.93147e-09
	IL10/IL19-Secretion	GOBP_REGULATION_OF_T_CELL_ACTIVATION	6.84378	3.08478e-08
	IL10/IL19-Secretion	GOBP_REGULATION_OF_CELL_ACTIVATION	4.62536	1.08206e-07
	IL10/IL19-Secretion	HP_ABNORMAL_MACROPHAGE_MORPHOLOGY	32.4795	1.11455e-07
	IL10/IL19-Secretion	GOBP_T_CELL_ACTIVATION	5.2795	1.46645e-07
	IL10/IL19-Secretion	GOBP_REGULATION_OF_CELL_CELL_ADHESION	5.53544	1.77858e-07
	IL10/IL19-Secretion	GOBP_REGULATION_OF_LYMPHOCYTE_ACTIVATION	4.9592	3.36761e-07
	IL10/IL19-Secretion	GOBP_NEGATIVE_REGULATION_OF_CELL_ACTIVATION	8.08078	3.96163e-07
	IL10/IL19-Secretion	GOBP_REGULATION_OF_CELL_ADHESION	4.16406	5.1906e-07
	IL10/IL19-Secretion	GOBP_NEGATIVE_REGULATION_OF_LEUKOCYTE_CELL_CELL_ADHESION	10.4832	5.63753e-07
	ISG	GOBP_DEFENSE_RESPONSE_TO_SYMBIONT	35.4164	2.5487e-62
	ISG	GOBP_RESPONSE_TO_VIRUS	27.0053	1.08507e-59
	ISG	GOBP_DEFENSE_RESPONSE_TO_OTHER_ORGANISM	13.3655	9.15005e-55
	ISG	GOBP_BIOLOGICAL_PROCESS_INVOLVED_IN_INTERSPECIES_INTERACTION_BETWEEN_ORGANISMS	10.6466	1.71856e-52
	ISG	GOBP_INNATE_IMMUNE_RESPONSE	13.9631	8.31606e-51
	ISG	GOBP_DEFENSE_RESPONSE	10.0993	2.62766e-50
	ISG	GOBP_IMMUNE_RESPONSE	8.51659	2.91325e-44
	ISG	GOBP_REGULATION_OF_VIRAL_PROCESS	34.5163	1.57759e-39
	ISG	GOBP_NEGATIVE_REGULATION_OF_VIRAL_PROCESS	54.6026	2.47645e-37
	ISG	GOBP_NEGATIVE_REGULATION_OF_VIRAL_GENOME_REPLICATION	78.0326	4.80552e-33
	MAIT	GOMF_MOLECULAR_TRANSDUCER_ACTIVITY	4.37332	7.8312e-11
	MAIT	GOBP_T_CELL_ACTIVATION	6.03791	2.61791e-10
	MAIT	GOBP_IMMUNE_RESPONSE	3.45352	2.99822e-10
	MAIT	GOMF_CYTOKINE_RECEPTOR_ACTIVITY	16.5753	4.25484e-10
	MAIT	GOBP_LYMPHOCYTE_ACTIVATION	4.71543	6.2058e-10
	MAIT	GOBP_CYTOKINE_MEDIATED_SIGNALING_PATHWAY	5.92652	2.05473e-09
	MAIT	GOMF_IMMUNE_RECEPTOR_ACTIVITY	11.7529	2.57189e-09
	MAIT	GOBP_CELL_CHEMOTAXIS	7.09208	6.72921e-09
	MAIT	GOBP_REGULATION_OF_IMMUNE_SYSTEM_PROCESS	3.45346	7.7174e-09
	MAIT	GOBP_CELL_ACTIVATION	3.78017	1.04664e-08
	MALAT1	GOMF_RNA_BINDING	4.06935	1.72185e-55
	MALAT1	GOBP_CHROMOSOME_ORGANIZATION	4.86228	3.31589e-51
	MALAT1	GOCC_NUCLEAR_BODY	4.91972	8.68576e-44
	MALAT1	GOBP_CHROMATIN_ORGANIZATION	5.47871	8.43363e-39
	MALAT1	GOBP_MRNA_METABOLIC_PROCESS	4.79019	6.971e-37
	MALAT1	GOBP_POSITIVE_REGULATION_OF_NUCLEOBASE_CONTAINING_COMPOUND_METABOLIC_PROCESS	3.05992	2.90423e-35
	MALAT1	GOBP_RNA_SPLICING	6.13203	5.74635e-34
	MALAT1	GOCC_CHROMOSOME	3.01	4.36455e-32
	MALAT1	GOMF_CHROMATIN_BINDING	4.87057	1.93319e-31
	MALAT1	GOBP_POSITIVE_REGULATION_OF_RNA_METABOLIC_PROCESS	2.98707	2.97334e-31
	Metallothionein	GOBP_ZINC_ION_HOMEOSTASIS	206.397	2.26364e-17
	Metallothionein	GOBP_CELLULAR_RESPONSE_TO_ZINC_ION	383.459	2.36064e-17
	Metallothionein	GOBP_CELLULAR_RESPONSE_TO_COPPER_ION	311.515	8.49563e-17
	Metallothionein	GOBP_RESPONSE_TO_ZINC_ION	148.103	3.00501e-16
	Metallothionein	GOBP_RESPONSE_TO_CADMIUM_ION	128.319	9.44888e-16
	Metallothionein	GOBP_CELLULAR_RESPONSE_TO_CADMIUM_ION	191.608	2.0676e-15
	Metallothionein	GOBP_RESPONSE_TO_COPPER_ION	166.028	5.53739e-15
	Metallothionein	GOBP_CELLULAR_TRANSITION_METAL_ION_HOMEOSTASIS	59.3785	5.42467e-13
	Metallothionein	GOBP_TRANSITION_METAL_ION_HOMEOSTASIS	47.5452	3.51654e-12
	Metallothionein	GOBP_DETOXIFICATION	46.7675	4.04088e-12
	Mito	GOBP_MRNA_METABOLIC_PROCESS	4.82169	9.04209e-16
	Mito	GOBP_RNA_SPLICING	6.0378	1.24951e-14
	Mito	HP_VENTRICULAR_PREEXCITATION	52.4408	4.03569e-14
	Mito	HP_RAGGED_RED_MUSCLE_FIBERS	27.931	8.17065e-14
	Mito	GOBP_MRNA_PROCESSING	5.32712	1.40397e-13
	Mito	HP_RETINAL_TELANGIECTASIA	44.1311	1.96539e-12
	Mito	HP_SLOW_DECREASE_IN_VISUAL_ACUITY	30.974	2.7428e-12
	Mito	GOMF_RNA_BINDING	2.87094	1.17362e-11
	Mito	HP_POSTURAL_TREMOR	18.1697	4.53251e-11
	Mito	HP_VASCULAR_TORTUOSITY	39.5973	5.13712e-11
	Multi-Cytokine	GOMF_CYTOKINE_ACTIVITY	21.4997	8.43161e-20
	Multi-Cytokine	GOBP_REGULATION_OF_IMMUNE_SYSTEM_PROCESS	6.84033	7.0146e-19
	Multi-Cytokine	GOBP_IMMUNE_RESPONSE	6.19479	7.33945e-19
	Multi-Cytokine	GOBP_REGULATION_OF_T_CELL_ACTIVATION	14.4478	1.29208e-18
	Multi-Cytokine	GOBP_REGULATION_OF_CELL_ACTIVATION	9.6291	1.74908e-18
	Multi-Cytokine	GOBP_REGULATION_OF_LYMPHOCYTE_ACTIVATION	10.9512	2.49969e-18
	Multi-Cytokine	GOBP_REGULATION_OF_CELL_CELL_ADHESION	11.945	4.55355e-18
	Multi-Cytokine	GOBP_T_CELL_ACTIVATION	11.1289	6.14296e-18
	Multi-Cytokine	GOBP_LEUKOCYTE_CELL_CELL_ADHESION	13.1631	9.22387e-18
	Multi-Cytokine	GOBP_CELL_ACTIVATION	7.30169	1.0899e-17
	NK-like	GOBP_IMMUNE_RESPONSE	7.19639	5.27718e-28
	NK-like	GOBP_DEFENSE_RESPONSE	6.77458	2.50092e-24
	NK-like	GOBP_INNATE_IMMUNE_RESPONSE	8.92915	1.60078e-23
	NK-like	GOBP_DEFENSE_RESPONSE_TO_OTHER_ORGANISM	7.97412	2.1152e-23
	NK-like	GOBP_LEUKOCYTE_MEDIATED_IMMUNITY	12.2788	2.41695e-23
	NK-like	GOBP_IMMUNE_EFFECTOR_PROCESS	9.53893	3.83704e-22
	NK-like	GOBP_BIOLOGICAL_PROCESS_INVOLVED_IN_INTERSPECIES_INTERACTION_BETWEEN_ORGANISMS	5.9317	4.26402e-20
	NK-like	GOBP_CELL_KILLING	19.8715	3.41174e-19
	NK-like	GOBP_NATURAL_KILLER_CELL_MEDIATED_IMMUNITY	37.1656	7.81355e-19
	NK-like	GOBP_CELL_ACTIVATION	6.36766	4.54711e-18
	OX40/EBI3-Activation	GOBP_RESPONSE_TO_CYTOKINE	5.27976	4.09723e-09
	OX40/EBI3-Activation	GOBP_IMMUNE_RESPONSE	3.91014	4.47108e-09
	OX40/EBI3-Activation	GOBP_CYTOKINE_MEDIATED_SIGNALING_PATHWAY	7.12962	7.51504e-09
	OX40/EBI3-Activation	GOBP_PROGRAMMED_CELL_DEATH	3.66628	2.7186e-08
	OX40/EBI3-Activation	GOBP_CELL_ACTIVATION	4.38667	4.96385e-08
	OX40/EBI3-Activation	GOBP_INFLAMMATORY_RESPONSE	5.16602	5.18744e-08
	OX40/EBI3-Activation	GOCC_SIDE_OF_MEMBRANE	5.2813	1.70815e-07
	OX40/EBI3-Activation	GOBP_REGULATION_OF_CELL_DEATH	3.55467	4.08937e-07
	OX40/EBI3-Activation	GOBP_MYELOID_DENDRITIC_CELL_ACTIVATION	37.7137	6.13212e-07
	OX40/EBI3-Activation	GOBP_POSITIVE_REGULATION_OF_GENE_EXPRESSION	3.92264	8.98303e-07
	RGCC/MYADM	GOBP_NEGATIVE_REGULATION_OF_PROTEIN_METABOLIC_PROCESS	4.19225	2.54448e-12
	RGCC/MYADM	GOBP_CELL_CYCLE	3.30628	1.03916e-11
	RGCC/MYADM	GOBP_PROGRAMMED_CELL_DEATH	3.07461	1.15581e-10
	RGCC/MYADM	GOCC_MICROTUBULE_CYTOSKELETON	3.20265	2.64012e-09
	RGCC/MYADM	GOBP_MICROTUBULE_BASED_PROCESS	3.73343	3.54687e-09
	RGCC/MYADM	GOBP_REGULATION_OF_INTRACELLULAR_SIGNAL_TRANSDUCTION	2.92321	3.85099e-09
	RGCC/MYADM	GOBP_REGULATION_OF_CELL_CYCLE	3.48033	4.16312e-09
	RGCC/MYADM	GOBP_NEGATIVE_REGULATION_OF_GENE_EXPRESSION	3.51262	5.32293e-09
	RGCC/MYADM	GOBP_NEGATIVE_REGULATION_OF_BIOSYNTHETIC_PROCESS	2.93743	8.97339e-09
	RGCC/MYADM	GOMF_IDENTICAL_PROTEIN_BINDING	2.75882	9.11376e-09
	SOX4/TOX2	GOBP_CELL_ACTIVATION	3.42346	1.17151e-07
	SOX4/TOX2	GOBP_LYMPHOCYTE_ACTIVATION	3.68334	5.6607e-07
	SOX4/TOX2	GOBP_REGULATION_OF_CELL_ACTIVATION	3.4882	9.55562e-06
	SOX4/TOX2	GOBP_B_CELL_PROLIFERATION	10.323	1.10959e-05
	SOX4/TOX2	GOBP_REGULATION_OF_LYMPHOCYTE_ACTIVATION	3.71984	2.08451e-05
	SOX4/TOX2	GOBP_MONONUCLEAR_CELL_DIFFERENTIATION	4.02145	2.86789e-05
	SOX4/TOX2	GOBP_B_CELL_ACTIVATION	4.55911	3.19406e-05
	SOX4/TOX2	GOBP_REGULATION_OF_T_CELL_ACTIVATION	4.29392	5.53252e-05
	SOX4/TOX2	GOBP_LEUKOCYTE_DIFFERENTIATION	3.36884	0.000104244
	SOX4/TOX2	GOBP_IMMUNE_SYSTEM_DEVELOPMENT	2.6957	0.000123894
	TIMD4/TIM3-Activation	GOBP_IMMUNE_RESPONSE	8.07997	1.69292e-18
	TIMD4/TIM3-Activation	GOBP_DEFENSE_RESPONSE	6.43847	2.46804e-13
	TIMD4/TIM3-Activation	GOBP_T_CELL_ACTIVATION	9.75652	4.02203e-11
	TIMD4/TIM3-Activation	GOBP_DEFENSE_RESPONSE_TO_OTHER_ORGANISM	6.70334	4.68253e-11
	TIMD4/TIM3-Activation	GOBP_INNATE_IMMUNE_RESPONSE	7.02864	2.79286e-10
	TIMD4/TIM3-Activation	GOCC_EXTERNAL_SIDE_OF_PLASMA_MEMBRANE	9.48152	6.8169e-10
	TIMD4/TIM3-Activation	GOBP_BIOLOGICAL_PROCESS_INVOLVED_IN_INTERSPECIES_INTERACTION_BETWEEN_ORGANISMS	5.14287	8.53383e-10
	TIMD4/TIM3-Activation	GOBP_LYMPHOCYTE_ACTIVATION	6.90313	9.24498e-10
	TIMD4/TIM3-Activation	GOBP_CELL_ACTIVATION	5.91279	9.83969e-10
	TIMD4/TIM3-Activation	GOCC_CELL_SURFACE	6.37262	1.37439e-09
	TXNIP/H1FX	GOCC_CYTOSOLIC_RIBOSOME	145.84	2.5725e-86
	TXNIP/H1FX	GOMF_STRUCTURAL_CONSTITUENT_OF_RIBOSOME	58.1637	2.46525e-70
	TXNIP/H1FX	GOBP_CYTOPLASMIC_TRANSLATION	63.2277	1.39814e-69
	TXNIP/H1FX	GOCC_RIBOSOMAL_SUBUNIT	50.1015	2.01121e-67
	TXNIP/H1FX	GOCC_RIBOSOME	39.4753	1.235e-62
	TXNIP/H1FX	GOCC_CYTOSOLIC_LARGE_RIBOSOMAL_SUBUNIT	145.686	1.9251e-51
	TXNIP/H1FX	GOBP_PEPTIDE_BIOSYNTHETIC_PROCESS	11.8099	1.57418e-41
	TXNIP/H1FX	GOBP_PEPTIDE_METABOLIC_PROCESS	9.9242	8.18785e-39
	TXNIP/H1FX	GOCC_RIBONUCLEOPROTEIN_COMPLEX	10.8829	1.54655e-38
	TXNIP/H1FX	GOCC_LARGE_RIBOSOMAL_SUBUNIT	40.6837	2.52397e-38
	Tfh-1	GOBP_REGULATION_OF_CELL_POPULATION_PROLIFERATION	2.89023	1.61982e-09
	Tfh-1	GOBP_CELL_ACTIVATION	3.23663	2.44647e-09
	Tfh-1	GOBP_IMMUNE_SYSTEM_DEVELOPMENT	3.28946	8.7586e-09
	Tfh-1	GOBP_REGULATION_OF_T_CELL_ACTIVATION	5.07499	2.07788e-08
	Tfh-1	GOBP_REGULATION_OF_IMMUNE_SYSTEM_PROCESS	2.81003	2.26425e-08
	Tfh-1	GOBP_T_CELL_ACTIVATION	4.14789	3.6095e-08
	Tfh-1	GOBP_LYMPHOCYTE_ACTIVATION	3.40028	3.88135e-08
	Tfh-1	GOBP_REGULATION_OF_CELL_DIFFERENTIATION	2.72308	4.27176e-08
	Tfh-1	GOCC_CELL_SUBSTRATE_JUNCTION	4.22982	9.06996e-08
	Tfh-1	GOCC_ANCHORING_JUNCTION	3.20261	1.33655e-07
	Tfh-2	GOBP_REGULATION_OF_MULTICELLULAR_ORGANISMAL_DEVELOPMENT	3.97613	4.90189e-08
	Tfh-2	GOBP_TISSUE_DEVELOPMENT	3.518	5.43617e-08
	Tfh-2	GOBP_POSITIVE_REGULATION_OF_MULTICELLULAR_ORGANISMAL_PROCESS	3.66652	2.1265e-07
	Tfh-2	GOBP_REGULATION_OF_CELL_DIFFERENTIATION	3.29861	2.0018e-06
	Tfh-2	GOBP_EAR_DEVELOPMENT	8.09521	4.22786e-06
	Tfh-2	GOBP_ANATOMICAL_STRUCTURE_FORMATION_INVOLVED_IN_MORPHOGENESIS	3.21759	3.37518e-05
	Tfh-2	GOBP_ENZYME_LINKED_RECEPTOR_PROTEIN_SIGNALING_PATHWAY	3.39488	4.24965e-05
	Tfh-2	GOBP_NEGATIVE_REGULATION_OF_RESPONSE_TO_STIMULUS	2.76097	6.09341e-05
	Tfh-2	GOBP_SENSORY_ORGAN_DEVELOPMENT	4.20294	7.25068e-05
	Tfh-2	GOBP_ANIMAL_ORGAN_MORPHOGENESIS	3.19691	8.50919e-05
	Th17	GOBP_RESPONSE_TO_CYTOKINE	5.69235	7.83397e-12
	Th17	GOBP_REGULATION_OF_IMMUNE_SYSTEM_PROCESS	4.50055	2.0413e-11
	Th17	GOBP_T_CELL_ACTIVATION	6.84218	2.30718e-10
	Th17	GOBP_REGULATION_OF_CELL_DIFFERENTIATION	4.03513	8.22907e-10
	Th17	GOBP_MONONUCLEAR_CELL_DIFFERENTIATION	7.12864	8.77262e-10
	Th17	GOBP_IMMUNE_SYSTEM_DEVELOPMENT	4.68829	1.77277e-09
	Th17	GOBP_POSITIVE_REGULATION_OF_CELL_ADHESION	6.74059	2.01525e-09
	Th17	GOBP_CYTOKINE_MEDIATED_SIGNALING_PATHWAY	6.62567	2.59818e-09
	Th17	GOBP_IMMUNE_RESPONSE	3.57858	3.57422e-09
	Th17	GOBP_T_CELL_DIFFERENTIATION	8.80616	4.40382e-09
	Th17-2	GOBP_INFLAMMATORY_RESPONSE	5.96708	6.21246e-07
	Th17-2	GOMF_MOLECULAR_TRANSDUCER_ACTIVITY	4.874	1.51905e-06
	Th17-2	GOBP_DEFENSE_RESPONSE	3.70589	1.48774e-05
	Th17-2	GOBP_IMMUNE_RESPONSE	3.4425	2.44971e-05
	Th17-2	GOBP_POSITIVE_REGULATION_OF_MULTICELLULAR_ORGANISMAL_PROCESS	3.68128	4.04925e-05
	Th17-2	GOBP_CELLULAR_RESPONSE_TO_INTERLEUKIN_1	13.9041	5.04035e-05
	Th17-2	GOBP_CELL_MIGRATION	3.55315	5.99378e-05
	Th17-2	GOBP_TUBE_MORPHOGENESIS	4.37651	6.29366e-05
	Th17-2	GOBP_RESPONSE_TO_INTERLEUKIN_1	10.8864	0.000151904
	Th17-2	GOMF_CYTOKINE_BINDING	10.6297	0.000169025
	Th2-1	GOBP_RESPONSE_TO_CYTOKINE	5.1857	2.42447e-10
	Th2-1	GOBP_CYTOKINE_MEDIATED_SIGNALING_PATHWAY	6.19471	1.72274e-08
	Th2-1	GOBP_T_CELL_DIFFERENTIATION	8.0825	3.87092e-08
	Th2-1	GOMF_MOLECULAR_TRANSDUCER_ACTIVITY	3.98644	6.5713e-08
	Th2-1	GOBP_IMMUNE_RESPONSE	3.18861	1.48447e-07
	Th2-1	GOBP_IMMUNE_SYSTEM_DEVELOPMENT	4.03358	1.59593e-07
	Th2-1	GOCC_ENDOPLASMIC_RETICULUM_PROTEIN_CONTAINING_COMPLEX	11.7686	2.26193e-07
	Th2-1	GOBP_REGULATION_OF_LYMPHOCYTE_DIFFERENTIATION	9.14034	4.50215e-07
	Th2-1	GOBP_POSITIVE_REGULATION_OF_LYMPHOCYTE_DIFFERENTIATION	12.255	7.79763e-07
	Th2-1	GOBP_REGULATION_OF_T_CELL_DIFFERENTIATION	9.90015	8.80244e-07
	Th2-2	GOBP_REGULATION_OF_INFLAMMATORY_RESPONSE	10.2221	2.25963e-10
	Th2-2	GOBP_POSITIVE_REGULATION_OF_ACUTE_INFLAMMATORY_RESPONSE	67.6304	2.1157e-09
	Th2-2	GOBP_REGULATION_OF_ACUTE_INFLAMMATORY_RESPONSE	39.8106	2.29735e-09
	Th2-2	GOBP_INFLAMMATORY_RESPONSE	6.11023	4.90428e-09
	Th2-2	GOBP_POSITIVE_REGULATION_OF_INFLAMMATORY_RESPONSE	15.6046	2.37198e-08
	Th2-2	GOBP_ACUTE_INFLAMMATORY_RESPONSE	16.6603	8.60458e-08
	Th2-2	GOBP_REGULATION_OF_DEFENSE_RESPONSE	5.7766	3.03284e-07
	Th2-2	GOBP_REGULATION_OF_CELL_POPULATION_PROLIFERATION	3.68046	6.97648e-07
	Th2-2	GOMF_CYTOKINE_ACTIVITY	10.0349	8.12453e-07
	Th2-2	GOMF_MOLECULAR_TRANSDUCER_ACTIVITY	4.21682	1.11448e-06
	Tph	GOBP_T_CELL_ACTIVATION	8.48149	6.7007e-16
	Tph	GOBP_LYMPHOCYTE_ACTIVATION	6.34739	7.06775e-15
	Tph	GOBP_CELL_ACTIVATION	5.35885	1.64224e-14
	Tph	GOCC_CELL_SURFACE	5.68348	5.84057e-14
	Tph	GOBP_REGULATION_OF_CELL_POPULATION_PROLIFERATION	4.4577	6.49651e-14
	Tph	GOBP_POSITIVE_REGULATION_OF_MULTICELLULAR_ORGANISMAL_PROCESS	4.57665	2.56612e-13
	Tph	GOCC_SIDE_OF_MEMBRANE	6.37565	4.73788e-13
	Tph	GOBP_REGULATION_OF_IMMUNE_SYSTEM_PROCESS	4.46129	5.46249e-13
	Tph	GOBP_REGULATION_OF_T_CELL_ACTIVATION	9.00313	6.26447e-13
	Tph	GOBP_POSITIVE_REGULATION_OF_GENE_EXPRESSION	4.81994	2.21219e-12
	Translation	GOCC_CYTOSOLIC_RIBOSOME	1328.9	4.32416e-163
	Translation	GOMF_STRUCTURAL_CONSTITUENT_OF_RIBOSOME	318.672	9.60361e-137
	Translation	GOBP_CYTOPLASMIC_TRANSLATION	355.346	4.40849e-136
	Translation	GOCC_RIBOSOMAL_SUBUNIT	275.312	1.02324e-134
	Translation	GOCC_RIBOSOME	222.415	5.0049e-132
	Translation	GOBP_PEPTIDE_BIOSYNTHETIC_PROCESS	63.9922	4.10977e-102
	Translation	GOCC_RIBONUCLEOPROTEIN_COMPLEX	57.7606	3.3117e-97
	Translation	GOCC_CYTOSOLIC_LARGE_RIBOSOMAL_SUBUNIT	1252.48	8.19126e-97
	Translation	GOBP_AMIDE_BIOSYNTHETIC_PROCESS	51.5677	1.50234e-94
	Translation	GOBP_PEPTIDE_METABOLIC_PROCESS	49.952	1.96751e-93
	Treg	GOBP_REGULATION_OF_LYMPHOCYTE_ACTIVATION	6.53107	7.1823e-11
	Treg	GOBP_REGULATION_OF_CELL_ACTIVATION	5.58612	2.28935e-10
	Treg	GOBP_REGULATION_OF_T_CELL_ACTIVATION	7.6973	7.83694e-10
	Treg	GOBP_LEUKOCYTE_CELL_CELL_ADHESION	7.02675	2.84831e-09
	Treg	GOBP_IMMUNE_RESPONSE	3.44164	3.2868e-09
	Treg	GOBP_LYMPHOCYTE_ACTIVATION	4.72705	5.03273e-09
	Treg	GOBP_T_CELL_ACTIVATION	5.84233	6.556e-09
	Treg	GOBP_REGULATION_OF_LEUKOCYTE_PROLIFERATION	8.44946	7.07375e-09
	Treg	GOMF_CYTOKINE_BINDING	12.2226	7.76456e-09
	Treg	GOBP_REGULATION_OF_IMMUNE_SYSTEM_PROCESS	3.59324	1.46684e-08
	YPEL5/JUNB	GOBP_CELLULAR_RESPONSE_TO_STRESS	3.56796	4.54999e-13
	YPEL5/JUNB	GOBP_CELL_CYCLE	3.49475	4.59304e-12
	YPEL5/JUNB	GOBP_REGULATION_OF_CELL_CYCLE	4.10773	2.72713e-11
	YPEL5/JUNB	GOBP_REGULATION_OF_CELL_DEATH	3.48051	3.998e-11
	YPEL5/JUNB	GOBP_PROGRAMMED_CELL_DEATH	3.16598	1.60901e-10
	YPEL5/JUNB	GOBP_NEGATIVE_REGULATION_OF_BIOSYNTHETIC_PROCESS	3.3476	1.90288e-10
	YPEL5/JUNB	GOMF_RNA_BINDING	3.19962	3.37786e-10
	YPEL5/JUNB	GOBP_NEGATIVE_REGULATION_OF_NUCLEOBASE_CONTAINING_COMPOUND_METABOLIC_PROCESS	3.32876	7.34702e-10
	YPEL5/JUNB	GOBP_RESPONSE_TO_TOPOLOGICALLY_INCORRECT_PROTEIN	9.83233	1.16226e-09
	YPEL5/JUNB	GOBP_REGULATION_OF_MRNA_METABOLIC_PROCESS	6.77309	1.60555e-09
	gdT-Blood	GOBP_LEUKOCYTE_MEDIATED_CYTOTOXICITY	18.4887	8.95484e-18
	gdT-Blood	GOBP_NATURAL_KILLER_CELL_MEDIATED_IMMUNITY	27.0498	8.28766e-17
	gdT-Blood	GOBP_CELL_KILLING	14.3327	1.40733e-16
	gdT-Blood	GOBP_LEUKOCYTE_MEDIATED_IMMUNITY	6.78911	8.59889e-14
	gdT-Blood	GOBP_IMMUNE_RESPONSE	3.58914	3.41895e-13
	gdT-Blood	GOBP_DEFENSE_RESPONSE_TO_OTHER_ORGANISM	4.41614	6.43185e-13
	gdT-Blood	GOBP_BIOLOGICAL_PROCESS_INVOLVED_IN_INTERSPECIES_INTERACTION_BETWEEN_ORGANISMS	3.68589	1.727e-12
	gdT-Blood	GOBP_INNATE_IMMUNE_RESPONSE	4.74079	2.05637e-12
	gdT-Blood	GOBP_POSITIVE_REGULATION_OF_CELL_KILLING	22.7051	3.1545e-12
	gdT-Blood	GOBP_DEFENSE_RESPONSE	3.56659	5.0524e-12
IFNB 16h TM
	GEP	OR	P	start	condition	time
	ISG	77.5979	5.10307e-159	TM	IFNB	16h
	Multi-Cytokine	6.35664	5.10872e-09	TM	IFNB	16h
	Exhaustion	3.40746	7.23702e-06	TM	IFNB	16h
	NK-like	3.96635	1.86104e-05	TM	IFNB	16h
	Doublet-Myeloid	2.88368	4.38907e-05	TM	IFNB	16h
	Cytotoxic	3.19918	6.81956e-05	TM	IFNB	16h
	Doublet-Fibroblast	2.38565	7.64402e-05	TM	IFNB	16h
	TIMD4/TIM3-Activation	4.3533	0.000440065	TM	IFNB	16h
	MALAT1	1.77009	0.00132579	TM	IFNB	16h
	IL10/IL19-Secretion	3.06418	0.0016462	TM	IFNB	16h
	CD4-EM	3.00813	0.00295803	TM	IFNB	16h
	CD8-Trm-Like	2.85884	0.00414291	TM	IFNB	16h
	Doublet-RBC	3.58655	0.00499665	TM	IFNB	16h
	HeatShock	2.72358	0.00567446	TM	IFNB	16h
	OX40/EBI3-Activation	2.81641	0.0105195	TM	IFNB	16h
	Tph	2.4575	0.0108225	TM	IFNB	16h
	CD8-EM	2.31591	0.0154868	TM	IFNB	16h
	CTLA4+/CD38+-Activation	3.10748	0.0166491	TM	IFNB	16h
	Metallothionein	4.35862	0.0172743	TM	IFNB	16h
	MAIT	2.10435	0.0456173	TM	IFNB	16h
	SOX4/TOX2	1.99939	0.0535535	TM	IFNB	16h
	Doublet-Platelet	1.94544	0.0589418	TM	IFNB	16h
	Doublet-Plasmablast	0.193856	0.0675375	TM	IFNB	16h
	CD40LG/TXNIP	1.7818	0.109879	TM	IFNB	16h
	Tfh-1	1.66539	0.111898	TM	IFNB	16h
	gdT-Blood	1.6662	0.128384	TM	IFNB	16h
	IEG2	1.5052	0.186904	TM	IFNB	16h
	Tfh-2	1.596	0.254466	TM	IFNB	16h
	Translation	0.280748	0.270476	TM	IFNB	16h
	Treg	1.55775	0.293752	TM	IFNB	16h
	CCR10-Migration	1.52795	0.299726	TM	IFNB	16h
	CD4-CM	1.69267	0.308242	TM	IFNB	16h
	HLA	1.59163	0.327786	TM	IFNB	16h
	CellCycle-Late-S	0.3271	0.376617	TM	IFNB	16h
	CellCycle-S	0.324424	0.377148	TM	IFNB	16h
	RGCC/MYADM	1.3759	0.394704	TM	IFNB	16h
	IEG	0.575391	0.497193	TM	IFNB	16h
	Cytoskeleton	0.55909	0.500818	TM	IFNB	16h
	YPEL5/JUNB	1.30278	0.506099	TM	IFNB	16h
	CellCycle-G2M	0.36976	0.527142	TM	IFNB	16h
	TXNIP/H1FX	0.623086	0.538868	TM	IFNB	16h
	CD8-Naive	0.525342	0.594057	TM	IFNB	16h
	ICOS/CD38-Activation	1.15679	0.746921	TM	IFNB	16h
	Th2-1	1.11396	0.785181	TM	IFNB	16h
	Th17	1.11396	0.785181	TM	IFNB	16h
	Mito	0.845238	0.858073	TM	IFNB	16h
	Th17-2	0.506228	1	TM	IFNB	16h
	Th2-2	0.762286	1	TM	IFNB	16h
	CD4-Naive	0.812101	1	TM	IFNB	16h
	Early-Activation	0	1	TM	IFNB	16h
	BCL2-Survival	0.977082	1	TM	IFNB	16h
	Doublet-Bcell	0.910138	1	TM	IFNB	16h
IFNB 16h TN
	GEP	OR	P	start	condition	time
	ISG	120.375	1.78988e-156	TN	IFNB	16h
	Multi-Cytokine	8.76002	4.83002e-09	TN	IFNB	16h
	Exhaustion	4.93082	6.81541e-07	TN	IFNB	16h
	Tph	5.52093	5.30301e-06	TN	IFNB	16h
	Doublet-Myeloid	3.69121	3.76114e-05	TN	IFNB	16h
	MALAT1	2.4444	4.63563e-05	TN	IFNB	16h
	MAIT	3.85641	0.000907477	TN	IFNB	16h
	Th2-1	4.22732	0.000981019	TN	IFNB	16h
	Cytotoxic	3.29824	0.00150086	TN	IFNB	16h
	Treg	3.86564	0.00168058	TN	IFNB	16h
	TIMD4/TIM3-Activation	5.07812	0.00171955	TN	IFNB	16h
	NK-like	3.64926	0.0023618	TN	IFNB	16h
	CD40LG/TXNIP	3.26535	0.00267763	TN	IFNB	16h
	CD8-Trm-Like	3.55744	0.00490549	TN	IFNB	16h
	CTLA4+/CD38+-Activation	4.64525	0.00583725	TN	IFNB	16h
	OX40/EBI3-Activation	3.77044	0.0068438	TN	IFNB	16h
	Tfh-2	3.52774	0.00920457	TN	IFNB	16h
	gdT-Blood	2.69182	0.0129101	TN	IFNB	16h
	Th17	3.10279	0.0160552	TN	IFNB	16h
	IL10/IL19-Secretion	2.91656	0.0208298	TN	IFNB	16h
	BCL2-Survival	2.53373	0.0254152	TN	IFNB	16h
	Doublet-Fibroblast	1.84851	0.0369015	TN	IFNB	16h
	CD4-EM	2.61335	0.0486918	TN	IFNB	16h
	Doublet-Platelet	2.31342	0.0523437	TN	IFNB	16h
	HLA	2.89309	0.0555695	TN	IFNB	16h
	Doublet-Plasmablast	0	0.121854	TN	IFNB	16h
	ICOS/CD38-Activation	2.09934	0.179488	TN	IFNB	16h
	Translation	0	0.27143	TN	IFNB	16h
	Tfh-1	1.60941	0.285444	TN	IFNB	16h
	CCR10-Migration	1.82094	0.290336	TN	IFNB	16h
	IEG2	1.45716	0.317061	TN	IFNB	16h
	Doublet-RBC	1.72828	0.327827	TN	IFNB	16h
	CD4-Naive	1.47622	0.356481	TN	IFNB	16h
	CD4-CM	1.4957	0.391671	TN	IFNB	16h
	CellCycle-S	0	0.420771	TN	IFNB	16h
	Metallothionein	1.81214	0.430618	TN	IFNB	16h
	Mito	1.31461	0.472114	TN	IFNB	16h
	HeatShock	1.39596	0.480781	TN	IFNB	16h
	RGCC/MYADM	1.21943	0.575363	TN	IFNB	16h
	TXNIP/H1FX	0.557862	0.590804	TN	IFNB	16h
	Th2-2	1.38119	0.659023	TN	IFNB	16h
	CD8-Naive	0.471125	0.727242	TN	IFNB	16h
	CD8-EM	1.195	0.742609	TN	IFNB	16h
	SOX4/TOX2	1.15651	0.747327	TN	IFNB	16h
	Cytoskeleton	1.01469	0.771811	TN	IFNB	16h
	CellCycle-Late-S	0.591745	1	TN	IFNB	16h
	Early-Activation	0	1	TN	IFNB	16h
	Th17-2	0.915778	1	TN	IFNB	16h
	Doublet-Bcell	0.538433	1	TN	IFNB	16h
	IEG	0.690333	1	TN	IFNB	16h
	YPEL5/JUNB	0.986723	1	TN	IFNB	16h
	CellCycle-G2M	0.668915	1	TN	IFNB	16h
IFNB 5d TM
	GEP	OR	P	start	condition	time
	TIMD4/TIM3-Activation	23.6065	1.55222e-12	TM	IFNB	5d
	CTLA4+/CD38+-Activation	21.2089	2.71251e-10	TM	IFNB	5d
	CD8-Trm-Like	12.2984	7.29092e-09	TM	IFNB	5d
	Exhaustion	8.31559	2.86634e-08	TM	IFNB	5d
	CCR10-Migration	7.89472	1.6574e-05	TM	IFNB	5d
	Tph	7.37071	2.64643e-05	TM	IFNB	5d
	Cytotoxic	6.15615	3.34527e-05	TM	IFNB	5d
	ISG	5.63219	0.000159122	TM	IFNB	5d
	MAIT	6.10586	0.000249218	TM	IFNB	5d
	CD8-EM	6.00207	0.000275303	TM	IFNB	5d
	Th2-2	7.39833	0.000820338	TM	IFNB	5d
	Doublet-Fibroblast	3.25975	0.00104976	TM	IFNB	5d
	NK-like	5.54596	0.00108609	TM	IFNB	5d
	SOX4/TOX2	4.91134	0.00196557	TM	IFNB	5d
	Th17-2	7.89512	0.00216081	TM	IFNB	5d
	IL10/IL19-Secretion	4.95249	0.0043945	TM	IFNB	5d
	Treg	4.82455	0.00488569	TM	IFNB	5d
	ICOS/CD38-Activation	5.81782	0.00612697	TM	IFNB	5d
	Doublet-Myeloid	3.37965	0.00641287	TM	IFNB	5d
	Tfh-1	3.32611	0.011905	TM	IFNB	5d
	CD4-Naive	3.83239	0.0121173	TM	IFNB	5d
	MALAT1	0.14359	0.0154582	TM	IFNB	5d
	Th2-1	4.15298	0.0184382	TM	IFNB	5d
	gdT-Blood	3.37921	0.0195007	TM	IFNB	5d
	CD8-Naive	3.98569	0.0209928	TM	IFNB	5d
	Doublet-Platelet	3.10738	0.0448303	TM	IFNB	5d
	OX40/EBI3-Activation	3.71478	0.0514923	TM	IFNB	5d
	CD40LG/TXNIP	2.85224	0.0575074	TM	IFNB	5d
	Doublet-Bcell	3.37508	0.0644165	TM	IFNB	5d
	Multi-Cytokine	3.37508	0.0644165	TM	IFNB	5d
	CD4-EM	3.13586	0.0762143	TM	IFNB	5d
	Doublet-RBC	3.51846	0.115903	TM	IFNB	5d
	HLA	2.86675	0.159729	TM	IFNB	5d
	Mito	0	0.178932	TM	IFNB	5d
	RGCC/MYADM	1.85426	0.227005	TM	IFNB	5d
	Metallothionein	3.67572	0.243939	TM	IFNB	5d
	Th17	2.01817	0.26608	TM	IFNB	5d
	HeatShock	1.87575	0.293729	TM	IFNB	5d
	CellCycle-S	1.1905	0.571487	TM	IFNB	5d
	Tfh-2	1.12601	0.591567	TM	IFNB	5d
	Cytoskeleton	1.36582	0.660848	TM	IFNB	5d
	TXNIP/H1FX	0.561596	1	TM	IFNB	5d
	YPEL5/JUNB	0.656394	1	TM	IFNB	5d
	Translation	0	1	TM	IFNB	5d
	CD4-CM	0	1	TM	IFNB	5d
	CellCycle-Late-S	0	1	TM	IFNB	5d
	BCL2-Survival	0.69767	1	TM	IFNB	5d
	Doublet-Plasmablast	0.711423	1	TM	IFNB	5d
	IEG2	0.961718	1	TM	IFNB	5d
	IEG	0.694313	1	TM	IFNB	5d
	Early-Activation	0	1	TM	IFNB	5d
	CellCycle-G2M	0	1	TM	IFNB	5d
IFNB 5d TN
	GEP	OR	P	start	condition	time
	TIMD4/TIM3-Activation	19.9623	6.60029e-11	TN	IFNB	5d
	MAIT	8.55115	7.98401e-07	TN	IFNB	5d
	Exhaustion	6.4675	3.11688e-06	TN	IFNB	5d
	Th2-2	10.1123	1.22001e-05	TN	IFNB	5d
	Doublet-Platelet	7.02258	1.24014e-05	TN	IFNB	5d
	CD8-Trm-Like	8.06548	1.43018e-05	TN	IFNB	5d
	ISG	6.04277	3.82025e-05	TN	IFNB	5d
	gdT-Blood	5.28376	0.000240005	TN	IFNB	5d
	Cytotoxic	4.40733	0.00156925	TN	IFNB	5d
	Tph	5.07542	0.00167437	TN	IFNB	5d
	CD4-EM	5.07717	0.00397126	TN	IFNB	5d
	CD8-EM	3.94114	0.0108676	TN	IFNB	5d
	SOX4/TOX2	3.81288	0.012345	TN	IFNB	5d
	Multi-Cytokine	4.31255	0.0163553	TN	IFNB	5d
	Th17-2	5.47927	0.0199204	TN	IFNB	5d
	Th2-1	3.92072	0.0221002	TN	IFNB	5d
	Th17	3.92072	0.0221002	TN	IFNB	5d
	CTLA4+/CD38+-Activation	5.20766	0.0226313	TN	IFNB	5d
	Doublet-Myeloid	2.70342	0.0285579	TN	IFNB	5d
	Treg	3.59377	0.0289399	TN	IFNB	5d
	CCR10-Migration	3.52587	0.0306777	TN	IFNB	5d
	MALAT1	0.273594	0.0501621	TN	IFNB	5d
	OX40/EBI3-Activation	3.50845	0.0588904	TN	IFNB	5d
	Doublet-Fibroblast	2.17078	0.0591637	TN	IFNB	5d
	Doublet-Bcell	3.18762	0.0734369	TN	IFNB	5d
	IL10/IL19-Secretion	2.72929	0.103744	TN	IFNB	5d
	NK-like	2.51522	0.123618	TN	IFNB	5d
	Doublet-RBC	3.32436	0.126914	TN	IFNB	5d
	Tfh-1	2.04734	0.140193	TN	IFNB	5d
	Mito	0	0.182646	TN	IFNB	5d
	BCL2-Survival	2.02519	0.191939	TN	IFNB	5d
	Tfh-2	2.15992	0.242164	TN	IFNB	5d
	Metallothionein	3.47432	0.255967	TN	IFNB	5d
	TXNIP/H1FX	0	0.269529	TN	IFNB	5d
	IEG2	0	0.286707	TN	IFNB	5d
	Doublet-Plasmablast	0	0.409728	TN	IFNB	5d
	IEG	0	0.410736	TN	IFNB	5d
	YPEL5/JUNB	0	0.414726	TN	IFNB	5d
	RGCC/MYADM	0	0.425065	TN	IFNB	5d
	HLA	1.33209	0.531578	TN	IFNB	5d
	ICOS/CD38-Activation	1.30683	0.538314	TN	IFNB	5d
	Translation	0	0.629707	TN	IFNB	5d
	HeatShock	0	0.633125	TN	IFNB	5d
	CD40LG/TXNIP	1.3152	0.667218	TN	IFNB	5d
	CellCycle-Late-S	0	1	TN	IFNB	5d
	Early-Activation	0	1	TN	IFNB	5d
	CD8-Naive	0.903295	1	TN	IFNB	5d
	Cytoskeleton	0.63785	1	TN	IFNB	5d
	CD4-CM	0	1	TN	IFNB	5d
	CD4-Naive	0.689422	1	TN	IFNB	5d
	CellCycle-S	0	1	TN	IFNB	5d
	CellCycle-G2M	0	1	TN	IFNB	5d
Th1 16h TM
	GEP	OR	P	start	condition	time
	Multi-Cytokine	307.985	0.000127133	TM	Th1	16h
	CTLA4+/CD38+-Activation	123.681	0.0121738	TM	Th1	16h
	HLA	98.6058	0.0152017	TM	Th1	16h
	OX40/EBI3-Activation	83.9836	0.0177921	TM	Th1	16h
	Tfh-2	78.7846	0.018942	TM	Th1	16h
	HeatShock	64.7342	0.0229594	TM	Th1	16h
	Tph	58.7356	0.0252501	TM	Th1	16h
	IEG	48.581	0.0303911	TM	Th1	16h
	Early-Activation	0	1	TM	Th1	16h
	Doublet-Platelet	0	1	TM	Th1	16h
	Cytotoxic	0	1	TM	Th1	16h
	Mito	0	1	TM	Th1	16h
	gdT-Blood	0	1	TM	Th1	16h
	Doublet-RBC	0	1	TM	Th1	16h
	CCR10-Migration	0	1	TM	Th1	16h
	CellCycle-S	0	1	TM	Th1	16h
	MAIT	0	1	TM	Th1	16h
	Doublet-Myeloid	0	1	TM	Th1	16h
	Cytoskeleton	0	1	TM	Th1	16h
	NK-like	0	1	TM	Th1	16h
	ISG	0	1	TM	Th1	16h
	Metallothionein	0	1	TM	Th1	16h
	CD4-CM	0	1	TM	Th1	16h
	CD8-EM	0	1	TM	Th1	16h
	IEG2	0	1	TM	Th1	16h
	CD4-Naive	0	1	TM	Th1	16h
	Exhaustion	0	1	TM	Th1	16h
	CellCycle-Late-S	0	1	TM	Th1	16h
	Translation	0	1	TM	Th1	16h
	Doublet-Bcell	0	1	TM	Th1	16h
	Treg	0	1	TM	Th1	16h
	CellCycle-G2M	0	1	TM	Th1	16h
	TIMD4/TIM3-Activation	0	1	TM	Th1	16h
	Doublet-Plasmablast	0	1	TM	Th1	16h
	BCL2-Survival	0	1	TM	Th1	16h
	IL10/IL19-Secretion	0	1	TM	Th1	16h
	Th2-2	0	1	TM	Th1	16h
	Th2-1	0	1	TM	Th1	16h
	ICOS/CD38-Activation	0	1	TM	Th1	16h
	CD4-EM	0	1	TM	Th1	16h
	RGCC/MYADM	0	1	TM	Th1	16h
	CD8-Trm-Like	0	1	TM	Th1	16h
	Th17-2	0	1	TM	Th1	16h
	TXNIP/H1FX	0	1	TM	Th1	16h
	YPEL5/JUNB	0	1	TM	Th1	16h
	Doublet-Fibroblast	0	1	TM	Th1	16h
	SOX4/TOX2	0	1	TM	Th1	16h
	CD40LG/TXNIP	0	1	TM	Th1	16h
	MALAT1	0	1	TM	Th1	16h
	CD8-Naive	0	1	TM	Th1	16h
	Th17	0	1	TM	Th1	16h
	Tfh-1	0	1	TM	Th1	16h
Th1 16h TN
	GEP	OR	P	start	condition	time
	Tph	39.8246	8.42949e-06	TN	Th1	16h
	Tfh-2	36.9105	0.00013215	TN	Th1	16h
	Multi-Cytokine	35.785	0.000144455	TN	Th1	16h
	CD40LG/TXNIP	22.4077	0.000551309	TN	Th1	16h
	gdT-Blood	20.9928	0.000663489	TN	Th1	16h
	OX40/EBI3-Activation	24.1795	0.00401097	TN	Th1	16h
	Th17	20.0147	0.0057499	TN	Th1	16h
	MAIT	16.2071	0.00857368	TN	Th1	16h
	Cytotoxic	12.488	0.0139741	TN	Th1	16h
	Exhaustion	11.1764	0.0171672	TN	Th1	16h
	CTLA4+/CD38+-Activation	16.4803	0.0632566	TN	Th1	16h
	TIMD4/TIM3-Activation	14.8616	0.0698069	TN	Th1	16h
	HLA	13.1391	0.0784739	TN	Th1	16h
	Th2-1	9.27619	0.108913	TN	Th1	16h
	CD8-Trm-Like	9.0287	0.111696	TN	Th1	16h
	HeatShock	8.62574	0.116547	TN	Th1	16h
	NK-like	8.05996	0.124119	TN	Th1	16h
	CD8-EM	7.39746	0.134347	TN	Th1	16h
	CD4-Naive	6.80033	0.145134	TN	Th1	16h
	IEG	6.47333	0.151811	TN	Th1	16h
	Tfh-1	4.89146	0.195305	TN	Th1	16h
	Mito	4.0087	0.232471	TN	Th1	16h
	Doublet-Platelet	0	1	TN	Th1	16h
	Early-Activation	0	1	TN	Th1	16h
	CCR10-Migration	0	1	TN	Th1	16h
	BCL2-Survival	0	1	TN	Th1	16h
	CellCycle-Late-S	0	1	TN	Th1	16h
	Doublet-Myeloid	0	1	TN	Th1	16h
	CD4-CM	0	1	TN	Th1	16h
	CellCycle-S	0	1	TN	Th1	16h
	IEG2	0	1	TN	Th1	16h
	MALAT1	0	1	TN	Th1	16h
	CD8-Naive	0	1	TN	Th1	16h
	RGCC/MYADM	0	1	TN	Th1	16h
	Metallothionein	0	1	TN	Th1	16h
	Doublet-RBC	0	1	TN	Th1	16h
	YPEL5/JUNB	0	1	TN	Th1	16h
	Translation	0	1	TN	Th1	16h
	Doublet-Plasmablast	0	1	TN	Th1	16h
	CellCycle-G2M	0	1	TN	Th1	16h
	IL10/IL19-Secretion	0	1	TN	Th1	16h
	CD4-EM	0	1	TN	Th1	16h
	Th2-2	0	1	TN	Th1	16h
	ICOS/CD38-Activation	0	1	TN	Th1	16h
	SOX4/TOX2	0	1	TN	Th1	16h
	Doublet-Fibroblast	0	1	TN	Th1	16h
	Cytoskeleton	0	1	TN	Th1	16h
	Doublet-Bcell	0	1	TN	Th1	16h
	TXNIP/H1FX	0	1	TN	Th1	16h
	Th17-2	0	1	TN	Th1	16h
	ISG	0	1	TN	Th1	16h
	Treg	0	1	TN	Th1	16h
Th1 5d TM
	GEP	OR	P	start	condition	time
	Tfh-2	25.7776	3.26875e-05	TM	Th1	5d
	Tfh-1	11.8622	0.000589087	TM	Th1	5d
	Doublet-Fibroblast	6.06699	0.00628127	TM	Th1	5d
	Multi-Cytokine	11.3924	0.0153931	TM	Th1	5d
	MAIT	8.39835	0.0269165	TM	Th1	5d
	Doublet-Platelet	7.78694	0.0308548	TM	Th1	5d
	Metallothionein	18.3464	0.0561307	TM	Th1	5d
	CTLA4+/CD38+-Activation	8.82315	0.111728	TM	Th1	5d
	TIMD4/TIM3-Activation	7.95652	0.122957	TM	Th1	5d
	HLA	7.03434	0.137717	TM	Th1	5d
	OX40/EBI3-Activation	5.99122	0.159408	TM	Th1	5d
	CD8-Trm-Like	4.83373	0.193251	TM	Th1	5d
	IL10/IL19-Secretion	4.67766	0.198951	TM	Th1	5d
	HeatShock	4.61799	0.201221	TM	Th1	5d
	Treg	4.55982	0.203484	TM	Th1	5d
	Tph	4.19007	0.219153	TM	Th1	5d
	CD8-EM	3.9604	0.230162	TM	Th1	5d
	Doublet-Plasmablast	3.55105	0.252796	TM	Th1	5d
	IEG	3.46565	0.25809	TM	Th1	5d
	gdT-Blood	3.21776	0.274787	TM	Th1	5d
	Exhaustion	2.78147	0.310057	TM	Th1	5d
	Doublet-Myeloid	2.26205	0.365796	TM	Th1	5d
	MALAT1	0	0.400863	TM	Th1	5d
	BCL2-Survival	0	1	TM	Th1	5d
	Cytotoxic	0	1	TM	Th1	5d
	RGCC/MYADM	0	1	TM	Th1	5d
	CD8-Naive	0	1	TM	Th1	5d
	Th17	0	1	TM	Th1	5d
	CD4-CM	0	1	TM	Th1	5d
	IEG2	0	1	TM	Th1	5d
	Cytoskeleton	0	1	TM	Th1	5d
	Early-Activation	0	1	TM	Th1	5d
	NK-like	0	1	TM	Th1	5d
	CCR10-Migration	0	1	TM	Th1	5d
	CD4-Naive	0	1	TM	Th1	5d
	Th2-2	0	1	TM	Th1	5d
	Th17-2	0	1	TM	Th1	5d
	ICOS/CD38-Activation	0	1	TM	Th1	5d
	ISG	0	1	TM	Th1	5d
	CD40LG/TXNIP	0	1	TM	Th1	5d
	SOX4/TOX2	0	1	TM	Th1	5d
	Translation	0	1	TM	Th1	5d
	YPEL5/JUNB	0	1	TM	Th1	5d
	TXNIP/H1FX	0	1	TM	Th1	5d
	Doublet-Bcell	0	1	TM	Th1	5d
	CellCycle-Late-S	0	1	TM	Th1	5d
	Mito	0	1	TM	Th1	5d
	Th2-1	0	1	TM	Th1	5d
	Doublet-RBC	0	1	TM	Th1	5d
	CD4-EM	0	1	TM	Th1	5d
	CellCycle-S	0	1	TM	Th1	5d
	CellCycle-G2M	0	1	TM	Th1	5d
Th1 5d TN
	GEP	OR	P	start	condition	time
	Tfh-2	12.3787	3.48762e-06	TN	Th1	5d
	Multi-Cytokine	10.0881	5.07576e-05	TN	Th1	5d
	Doublet-Fibroblast	4.24772	0.00026434	TN	Th1	5d
	gdT-Blood	5.86194	0.000840264	TN	Th1	5d
	Th2-2	8.25809	0.0018349	TN	Th1	5d
	OX40/EBI3-Activation	7.14216	0.00304334	TN	Th1	5d
	CD8-Trm-Like	5.73452	0.0064416	TN	Th1	5d
	Tph	4.9576	0.01046	TN	Th1	5d
	TIMD4/TIM3-Activation	7.01959	0.0104829	TN	Th1	5d
	Tfh-1	3.90283	0.0114542	TN	Th1	5d
	MAIT	4.761	0.0119441	TN	Th1	5d
	MALAT1	0	0.015441	TN	Th1	5d
	CD8-EM	3.45559	0.0611568	TN	Th1	5d
	CTLA4+/CD38+-Activation	5.08586	0.0628326	TN	Th1	5d
	SOX4/TOX2	3.34432	0.06598	TN	Th1	5d
	Doublet-Myeloid	2.6551	0.0710228	TN	Th1	5d
	IEG	3.01978	0.0832609	TN	Th1	5d
	Exhaustion	2.41906	0.134742	TN	Th1	5d
	Doublet-Bcell	3.12782	0.139574	TN	Th1	5d
	Th17	2.8475	0.161428	TN	Th1	5d
	IL10/IL19-Secretion	2.68097	0.176902	TN	Th1	5d
	Metallothionein	5.17096	0.180895	TN	Th1	5d
	CCR10-Migration	2.56425	0.189093	TN	Th1	5d
	NK-like	2.47194	0.199634	TN	Th1	5d
	Doublet-Platelet	2.13791	0.245959	TN	Th1	5d
	Cytotoxic	1.77665	0.315931	TN	Th1	5d
	Th17-2	2.61322	0.322755	TN	Th1	5d
	Doublet-RBC	2.42805	0.342304	TN	Th1	5d
	HLA	1.98261	0.400598	TN	Th1	5d
	Mito	0	0.416554	TN	Th1	5d
	CD4-EM	1.42908	0.507122	TN	Th1	5d
	Th2-1	1.39971	0.51431	TN	Th1	5d
	HeatShock	1.30156	0.539789	TN	Th1	5d
	Treg	1.28516	0.544277	TN	Th1	5d
	CD4-Naive	1.02611	0.625468	TN	Th1	5d
	Cytoskeleton	0	0.629917	TN	Th1	5d
	YPEL5/JUNB	0	0.630626	TN	Th1	5d
	ISG	0	0.631082	TN	Th1	5d
	RGCC/MYADM	0	0.634569	TN	Th1	5d
	TXNIP/H1FX	0	0.640357	TN	Th1	5d
	IEG2	1.35694	0.661842	TN	Th1	5d
	Doublet-Plasmablast	1.00084	1	TN	Th1	5d
	Translation	0	1	TN	Th1	5d
	CD40LG/TXNIP	0.967458	1	TN	Th1	5d
	CellCycle-S	0	1	TN	Th1	5d
	CellCycle-Late-S	0	1	TN	Th1	5d
	BCL2-Survival	0.98149	1	TN	Th1	5d
	CD4-CM	0	1	TN	Th1	5d
	CD8-Naive	0	1	TN	Th1	5d
	ICOS/CD38-Activation	0	1	TN	Th1	5d
	Early-Activation	0	1	TN	Th1	5d
	CellCycle-G2M	0	1	TN	Th1	5d
Th17 16h TM
	GEP	OR	P	start	condition	time
	Doublet-Fibroblast	12.0234	3.38183e-05	TM	Th17	16h
	Doublet-Bcell	13.3763	0.0115695	TM	Th17	16h
	Th17-2	10.8191	0.0926733	TM	Th17	16h
	CD8-Naive	5.56618	0.171012	TM	Th17	16h
	IL10/IL19-Secretion	5.45833	0.174047	TM	Th17	16h
	SOX4/TOX2	4.47412	0.207704	TM	Th17	16h
	Doublet-Platelet	4.35833	0.212542	TM	Th17	16h
	Doublet-Myeloid	2.63958	0.324657	TM	Th17	16h
	MALAT1	0	0.630408	TM	Th17	16h
	Doublet-RBC	0	1	TM	Th17	16h
	gdT-Blood	0	1	TM	Th17	16h
	CellCycle-S	0	1	TM	Th17	16h
	Cytotoxic	0	1	TM	Th17	16h
	Early-Activation	0	1	TM	Th17	16h
	CCR10-Migration	0	1	TM	Th17	16h
	Th17	0	1	TM	Th17	16h
	MAIT	0	1	TM	Th17	16h
	Cytoskeleton	0	1	TM	Th17	16h
	Metallothionein	0	1	TM	Th17	16h
	Multi-Cytokine	0	1	TM	Th17	16h
	NK-like	0	1	TM	Th17	16h
	Mito	0	1	TM	Th17	16h
	CD4-CM	0	1	TM	Th17	16h
	IEG	0	1	TM	Th17	16h
	CD8-EM	0	1	TM	Th17	16h
	IEG2	0	1	TM	Th17	16h
	CD4-Naive	0	1	TM	Th17	16h
	HeatShock	0	1	TM	Th17	16h
	ISG	0	1	TM	Th17	16h
	CTLA4+/CD38+-Activation	0	1	TM	Th17	16h
	Translation	0	1	TM	Th17	16h
	RGCC/MYADM	0	1	TM	Th17	16h
	TIMD4/TIM3-Activation	0	1	TM	Th17	16h
	Doublet-Plasmablast	0	1	TM	Th17	16h
	BCL2-Survival	0	1	TM	Th17	16h
	Th2-2	0	1	TM	Th17	16h
	Th2-1	0	1	TM	Th17	16h
	CellCycle-G2M	0	1	TM	Th17	16h
	CD4-EM	0	1	TM	Th17	16h
	CD8-Trm-Like	0	1	TM	Th17	16h
	Tfh-2	0	1	TM	Th17	16h
	OX40/EBI3-Activation	0	1	TM	Th17	16h
	TXNIP/H1FX	0	1	TM	Th17	16h
	YPEL5/JUNB	0	1	TM	Th17	16h
	CD40LG/TXNIP	0	1	TM	Th17	16h
	Tph	0	1	TM	Th17	16h
	ICOS/CD38-Activation	0	1	TM	Th17	16h
	CellCycle-Late-S	0	1	TM	Th17	16h
	Treg	0	1	TM	Th17	16h
	Exhaustion	0	1	TM	Th17	16h
	HLA	0	1	TM	Th17	16h
	Tfh-1	0	1	TM	Th17	16h
Th17 16h TN
	GEP	OR	P	start	condition	time
	Doublet-Myeloid	16.7892	4.7745e-06	TN	Th17	16h
	OX40/EBI3-Activation	27.5213	2.55253e-05	TN	Th17	16h
	Tph	19.1036	0.000100921	TN	Th17	16h
	CTLA4+/CD38+-Activation	29.2123	0.000220835	TN	Th17	16h
	Doublet-Fibroblast	7.91509	0.000805134	TN	Th17	16h
	Tfh-2	18.4435	0.000811771	TN	Th17	16h
	Metallothionein	39.0294	0.00151414	TN	Th17	16h
	Th17-2	19.4777	0.00564036	TN	Th17	16h
	Multi-Cytokine	11.3924	0.0153931	TN	Th17	16h
	Th2-1	10.3714	0.0183057	TN	Th17	16h
	Treg	9.51735	0.0214328	TN	Th17	16h
	Tfh-1	5.45142	0.0579443	TN	Th17	16h
	Th2-2	6.90094	0.140154	TN	Th17	16h
	Th17	4.96623	0.188662	TN	Th17	16h
	MAIT	4.02664	0.226875	TN	Th17	16h
	Exhaustion	2.78147	0.310057	TN	Th17	16h
	MALAT1	0	0.400863	TN	Th17	16h
	TIMD4/TIM3-Activation	0	1	TN	Th17	16h
	RGCC/MYADM	0	1	TN	Th17	16h
	CD8-Naive	0	1	TN	Th17	16h
	CD4-Naive	0	1	TN	Th17	16h
	IEG2	0	1	TN	Th17	16h
	CD8-EM	0	1	TN	Th17	16h
	IEG	0	1	TN	Th17	16h
	CD4-CM	0	1	TN	Th17	16h
	Cytotoxic	0	1	TN	Th17	16h
	Doublet-Platelet	0	1	TN	Th17	16h
	NK-like	0	1	TN	Th17	16h
	Early-Activation	0	1	TN	Th17	16h
	HeatShock	0	1	TN	Th17	16h
	Cytoskeleton	0	1	TN	Th17	16h
	CellCycle-Late-S	0	1	TN	Th17	16h
	CCR10-Migration	0	1	TN	Th17	16h
	TXNIP/H1FX	0	1	TN	Th17	16h
	IL10/IL19-Secretion	0	1	TN	Th17	16h
	CellCycle-S	0	1	TN	Th17	16h
	ICOS/CD38-Activation	0	1	TN	Th17	16h
	Doublet-Bcell	0	1	TN	Th17	16h
	CD4-EM	0	1	TN	Th17	16h
	gdT-Blood	0	1	TN	Th17	16h
	CD8-Trm-Like	0	1	TN	Th17	16h
	Mito	0	1	TN	Th17	16h
	ISG	0	1	TN	Th17	16h
	BCL2-Survival	0	1	TN	Th17	16h
	YPEL5/JUNB	0	1	TN	Th17	16h
	HLA	0	1	TN	Th17	16h
	SOX4/TOX2	0	1	TN	Th17	16h
	CD40LG/TXNIP	0	1	TN	Th17	16h
	Translation	0	1	TN	Th17	16h
	Doublet-RBC	0	1	TN	Th17	16h
	Doublet-Plasmablast	0	1	TN	Th17	16h
	CellCycle-G2M	0	1	TN	Th17	16h
Th17 5d TM
	GEP	OR	P	start	condition	time
	Doublet-Fibroblast	4.33446	2.09176e-19	TM	Th17	5d
	MALAT1	0.204103	9.64213e-08	TM	Th17	5d
	Tfh-2	4.47956	1.40876e-06	TM	Th17	5d
	Tfh-1	2.98367	5.69739e-06	TM	Th17	5d
	Doublet-Platelet	2.84355	0.000267442	TM	Th17	5d
	Doublet-Myeloid	2.31803	0.000662307	TM	Th17	5d
	Th17-2	3.77037	0.00122118	TM	Th17	5d
	Doublet-Bcell	2.90732	0.00166665	TM	Th17	5d
	OX40/EBI3-Activation	2.63059	0.0073678	TM	Th17	5d
	Th2-2	2.72788	0.00868098	TM	Th17	5d
	Th2-1	2.38742	0.00975933	TM	Th17	5d
	Cytoskeleton	0.135081	0.0113247	TM	Th17	5d
	Translation	0	0.0159302	TM	Th17	5d
	CTLA4+/CD38+-Activation	2.69512	0.0204492	TM	Th17	5d
	Tph	1.99165	0.0328242	TM	Th17	5d
	CellCycle-Late-S	0	0.036452	TM	Th17	5d
	CellCycle-S	0	0.036886	TM	Th17	5d
	Metallothionein	3.19714	0.0447591	TM	Th17	5d
	CellCycle-G2M	0	0.0532251	TM	Th17	5d
	Mito	0.438094	0.0632352	TM	Th17	5d
	Doublet-Plasmablast	0.286652	0.0725679	TM	Th17	5d
	Multi-Cytokine	1.86557	0.0879684	TM	Th17	5d
	MAIT	1.72309	0.0941324	TM	Th17	5d
	Exhaustion	0.453414	0.11697	TM	Th17	5d
	ISG	0.393548	0.128616	TM	Th17	5d
	TXNIP/H1FX	0.457002	0.156581	TM	Th17	5d
	Th17	1.69122	0.157385	TM	Th17	5d
	Doublet-RBC	1.8242	0.208833	TM	Th17	5d
	CD40LG/TXNIP	1.45767	0.241995	TM	Th17	5d
	CD4-CM	1.57089	0.262257	TM	Th17	5d
	CD8-Trm-Like	1.4263	0.353754	TM	Th17	5d
	CD8-Naive	1.40675	0.358183	TM	Th17	5d
	gdT-Blood	0.660862	0.454854	TM	Th17	5d
	Cytotoxic	0.637616	0.457831	TM	Th17	5d
	CD4-EM	1.2738	0.482235	TM	Th17	5d
	CCR10-Migration	1.31648	0.503187	TM	Th17	5d
	CD8-EM	0.648831	0.533023	TM	Th17	5d
	TIMD4/TIM3-Activation	1.32568	0.5507	TM	Th17	5d
	YPEL5/JUNB	0.673124	0.56721	TM	Th17	5d
	ICOS/CD38-Activation	0.559718	0.588274	TM	Th17	5d
	Treg	1.14139	0.656426	TM	Th17	5d
	NK-like	0.707997	0.665331	TM	Th17	5d
	SOX4/TOX2	1.12177	0.682593	TM	Th17	5d
	CD4-Naive	0.749514	0.690363	TM	Th17	5d
	RGCC/MYADM	1.13954	0.714281	TM	Th17	5d
	IEG2	1.09989	0.744985	TM	Th17	5d
	IL10/IL19-Secretion	0.768659	0.821451	TM	Th17	5d
	HeatShock	0.758664	0.82193	TM	Th17	5d
	Early-Activation	0	1	TM	Th17	5d
	BCL2-Survival	0.865083	1	TM	Th17	5d
	IEG	0.860819	1	TM	Th17	5d
	HLA	0.865683	1	TM	Th17	5d
Th17 5d TN
	GEP	OR	P	start	condition	time
	Doublet-Fibroblast	3.23147	5.02004e-16	TN	Th17	5d
	MALAT1	0.127372	8.75467e-15	TN	Th17	5d
	Th17-2	5.83927	1.59017e-08	TN	Th17	5d
	ISG	0	1.15725e-05	TN	Th17	5d
	Mito	0.163017	3.21353e-05	TN	Th17	5d
	Doublet-Bcell	3.06199	6.15414e-05	TN	Th17	5d
	OX40/EBI3-Activation	2.99392	0.000184472	TN	Th17	5d
	MAIT	2.57206	0.000235589	TN	Th17	5d
	Cytoskeleton	0.0846373	0.000267874	TN	Th17	5d
	Th2-2	3.04004	0.000370394	TN	Th17	5d
	Tfh-2	2.78267	0.000394762	TN	Th17	5d
	CD4-Naive	0.0914839	0.000560958	TN	Th17	5d
	Th17	2.58408	0.000597682	TN	Th17	5d
	Translation	0	0.000910755	TN	Th17	5d
	Doublet-Platelet	2.24081	0.00154199	TN	Th17	5d
	CellCycle-Late-S	0	0.003103	TN	Th17	5d
	CellCycle-S	0	0.00316225	TN	Th17	5d
	TXNIP/H1FX	0.285871	0.00430272	TN	Th17	5d
	Doublet-Myeloid	1.78567	0.00680831	TN	Th17	5d
	CellCycle-G2M	0	0.00702994	TN	Th17	5d
	Doublet-Plasmablast	0.270866	0.0104122	TN	Th17	5d
	Metallothionein	3.17835	0.0174711	TN	Th17	5d
	Tfh-1	1.68055	0.0270179	TN	Th17	5d
	Multi-Cytokine	1.97997	0.0282819	TN	Th17	5d
	Tph	1.74192	0.0550417	TN	Th17	5d
	CD8-EM	0.405897	0.0652143	TN	Th17	5d
	Exhaustion	0.503694	0.0673209	TN	Th17	5d
	CTLA4+/CD38+-Activation	1.95122	0.0783044	TN	Th17	5d
	BCL2-Survival	0.447841	0.0813082	TN	Th17	5d
	Th2-1	1.48793	0.190628	TN	Th17	5d
	CD40LG/TXNIP	1.40485	0.209365	TN	Th17	5d
	Doublet-RBC	1.64067	0.213137	TN	Th17	5d
	CD4-CM	0.379619	0.247068	TN	Th17	5d
	CD8-Trm-Like	1.44542	0.263284	TN	Th17	5d
	CD8-Naive	1.42506	0.267074	TN	Th17	5d
	NK-like	1.40728	0.290703	TN	Th17	5d
	RGCC/MYADM	1.31221	0.302481	TN	Th17	5d
	gdT-Blood	0.672167	0.361777	TN	Th17	5d
	ICOS/CD38-Activation	0.531414	0.378547	TN	Th17	5d
	SOX4/TOX2	1.24083	0.412287	TN	Th17	5d
	Cytotoxic	0.733198	0.45645	TN	Th17	5d
	IL10/IL19-Secretion	1.2588	0.464951	TN	Th17	5d
	HLA	1.32129	0.500368	TN	Th17	5d
	YPEL5/JUNB	0.774793	0.542943	TN	Th17	5d
	CD4-EM	1.22408	0.567601	TN	Th17	5d
	CCR10-Migration	1.20114	0.591181	TN	Th17	5d
	IEG2	1.08778	0.695219	TN	Th17	5d
	IEG	0.82133	0.752585	TN	Th17	5d
	TIMD4/TIM3-Activation	1.04957	0.813563	TN	Th17	5d
	Treg	0.838403	0.856947	TN	Th17	5d
	HeatShock	0.978293	1	TN	Th17	5d
	Early-Activation	0	1	TN	Th17	5d
Th2 16h TM
	GEP	OR	P	start	condition	time
	CellCycle-G2M	0	1	TM	Th2	16h
	HLA	0	1	TM	Th2	16h
	ISG	0	1	TM	Th2	16h
	Mito	0	1	TM	Th2	16h
	Doublet-RBC	0	1	TM	Th2	16h
	gdT-Blood	0	1	TM	Th2	16h
	CellCycle-S	0	1	TM	Th2	16h
	Cytotoxic	0	1	TM	Th2	16h
	Doublet-Platelet	0	1	TM	Th2	16h
	Early-Activation	0	1	TM	Th2	16h
	CCR10-Migration	0	1	TM	Th2	16h
	Translation	0	1	TM	Th2	16h
	MAIT	0	1	TM	Th2	16h
	Cytoskeleton	0	1	TM	Th2	16h
	HeatShock	0	1	TM	Th2	16h
	Multi-Cytokine	0	1	TM	Th2	16h
	NK-like	0	1	TM	Th2	16h
	Doublet-Myeloid	0	1	TM	Th2	16h
	Metallothionein	0	1	TM	Th2	16h
	CD4-CM	0	1	TM	Th2	16h
	IEG	0	1	TM	Th2	16h
	CD8-EM	0	1	TM	Th2	16h
	IEG2	0	1	TM	Th2	16h
	CellCycle-Late-S	0	1	TM	Th2	16h
	CD4-Naive	0	1	TM	Th2	16h
	Treg	0	1	TM	Th2	16h
	Th17	0	1	TM	Th2	16h
	CD8-Naive	0	1	TM	Th2	16h
	RGCC/MYADM	0	1	TM	Th2	16h
	TIMD4/TIM3-Activation	0	1	TM	Th2	16h
	Doublet-Plasmablast	0	1	TM	Th2	16h
	BCL2-Survival	0	1	TM	Th2	16h
	IL10/IL19-Secretion	0	1	TM	Th2	16h
	Th2-2	0	1	TM	Th2	16h
	Th2-1	0	1	TM	Th2	16h
	ICOS/CD38-Activation	0	1	TM	Th2	16h
	Doublet-Bcell	0	1	TM	Th2	16h
	MALAT1	0	1	TM	Th2	16h
	CD4-EM	0	1	TM	Th2	16h
	CD8-Trm-Like	0	1	TM	Th2	16h
	Th17-2	0	1	TM	Th2	16h
	Tfh-2	0	1	TM	Th2	16h
	OX40/EBI3-Activation	0	1	TM	Th2	16h
	TXNIP/H1FX	0	1	TM	Th2	16h
	YPEL5/JUNB	0	1	TM	Th2	16h
	Doublet-Fibroblast	0	1	TM	Th2	16h
	SOX4/TOX2	0	1	TM	Th2	16h
	CD40LG/TXNIP	0	1	TM	Th2	16h
	Tph	0	1	TM	Th2	16h
	CTLA4+/CD38+-Activation	0	1	TM	Th2	16h
	Exhaustion	0	1	TM	Th2	16h
	Tfh-1	0	1	TM	Th2	16h
Th2 16h TN
	GEP	OR	P	start	condition	time
	Th2-2	22.7184	4.90373e-05	TN	Th2	16h
	Th2-1	16.2175	0.00017249	TN	Th2	16h
	Metallothionein	28.4671	0.00272896	TN	Th2	16h
	IL10/IL19-Secretion	11.0519	0.00323835	TN	Th2	16h
	RGCC/MYADM	7.0917	0.0106937	TN	Th2	16h
	IEG2	5.57618	0.0199564	TN	Th2	16h
	CD4-EM	7.72444	0.0307169	TN	Th2	16h
	Tph	6.37557	0.043244	TN	Th2	16h
	SOX4/TOX2	5.83126	0.0505807	TN	Th2	16h
	Doublet-Platelet	5.67958	0.0529599	TN	Th2	16h
	YPEL5/JUNB	4.97909	0.0664696	TN	Th2	16h
	Doublet-Myeloid	3.43286	0.123121	TN	Th2	16h
	CD4-CM	5.49946	0.1713	TN	Th2	16h
	OX40/EBI3-Activation	4.41242	0.20831	TN	Th2	16h
	Tfh-2	4.13927	0.220284	TN	Th2	16h
	Multi-Cytokine	4.01493	0.226205	TN	Th2	16h
	Doublet-Bcell	4.01493	0.226205	TN	Th2	16h
	Th17	3.65754	0.245148	TN	Th2	16h
	CD8-Naive	3.51307	0.253737	TN	Th2	16h
	Treg	3.35822	0.263638	TN	Th2	16h
	Doublet-Fibroblast	2.04072	0.267287	TN	Th2	16h
	BCL2-Survival	2.56472	0.329447	TN	Th2	16h
	IEG	2.55238	0.330728	TN	Th2	16h
	CD40LG/TXNIP	2.52805	0.333284	TN	Th2	16h
	gdT-Blood	2.36982	0.350911	TN	Th2	16h
	Cytotoxic	2.2879	0.360778	TN	Th2	16h
	TXNIP/H1FX	2.06452	0.390682	TN	Th2	16h
	MALAT1	1.67547	0.431705	TN	Th2	16h
	Exhaustion	0	1	TN	Th2	16h
	CD4-Naive	0	1	TN	Th2	16h
	CD8-EM	0	1	TN	Th2	16h
	NK-like	0	1	TN	Th2	16h
	HeatShock	0	1	TN	Th2	16h
	Cytoskeleton	0	1	TN	Th2	16h
	CellCycle-Late-S	0	1	TN	Th2	16h
	CCR10-Migration	0	1	TN	Th2	16h
	Doublet-Plasmablast	0	1	TN	Th2	16h
	Early-Activation	0	1	TN	Th2	16h
	CellCycle-S	0	1	TN	Th2	16h
	Doublet-RBC	0	1	TN	Th2	16h
	Mito	0	1	TN	Th2	16h
	ISG	0	1	TN	Th2	16h
	HLA	0	1	TN	Th2	16h
	Translation	0	1	TN	Th2	16h
	TIMD4/TIM3-Activation	0	1	TN	Th2	16h
	CellCycle-G2M	0	1	TN	Th2	16h
	CTLA4+/CD38+-Activation	0	1	TN	Th2	16h
	Th17-2	0	1	TN	Th2	16h
	ICOS/CD38-Activation	0	1	TN	Th2	16h
	CD8-Trm-Like	0	1	TN	Th2	16h
	MAIT	0	1	TN	Th2	16h
	Tfh-1	0	1	TN	Th2	16h
Th2 5d TM
	GEP	OR	P	start	condition	time
	Doublet-Fibroblast	7.36475	0.000341283	TM	Th2	5d
	Doublet-Platelet	9.32048	0.00518334	TM	Th2	5d
	Tfh-1	6.51497	0.0134389	TM	Th2	5d
	Tfh-2	9.05914	0.0230807	TM	Th2	5d
	Doublet-Bcell	4.23839	0.215952	TM	Th2	5d
	Th2-1	3.86111	0.234172	TM	Th2	5d
	IL10/IL19-Secretion	3.63675	0.246544	TM	Th2	5d
	MAIT	3.1306	0.279898	TM	Th2	5d
	SOX4/TOX2	2.98099	0.29155	TM	Th2	5d
	YPEL5/JUNB	2.5473	0.331512	TM	Th2	5d
	IEG2	1.84654	0.425217	TM	Th2	5d
	Doublet-Myeloid	1.75868	0.440729	TM	Th2	5d
	Doublet-RBC	0	1	TM	Th2	5d
	gdT-Blood	0	1	TM	Th2	5d
	CellCycle-S	0	1	TM	Th2	5d
	Cytotoxic	0	1	TM	Th2	5d
	Early-Activation	0	1	TM	Th2	5d
	CCR10-Migration	0	1	TM	Th2	5d
	CellCycle-Late-S	0	1	TM	Th2	5d
	Cytoskeleton	0	1	TM	Th2	5d
	IEG	0	1	TM	Th2	5d
	Multi-Cytokine	0	1	TM	Th2	5d
	NK-like	0	1	TM	Th2	5d
	Metallothionein	0	1	TM	Th2	5d
	CD4-CM	0	1	TM	Th2	5d
	Mito	0	1	TM	Th2	5d
	CD8-EM	0	1	TM	Th2	5d
	CD4-Naive	0	1	TM	Th2	5d
	Exhaustion	0	1	TM	Th2	5d
	HeatShock	0	1	TM	Th2	5d
	ISG	0	1	TM	Th2	5d
	ICOS/CD38-Activation	0	1	TM	Th2	5d
	Translation	0	1	TM	Th2	5d
	TIMD4/TIM3-Activation	0	1	TM	Th2	5d
	Doublet-Plasmablast	0	1	TM	Th2	5d
	BCL2-Survival	0	1	TM	Th2	5d
	Th2-2	0	1	TM	Th2	5d
	CTLA4+/CD38+-Activation	0	1	TM	Th2	5d
	CD4-EM	0	1	TM	Th2	5d
	RGCC/MYADM	0	1	TM	Th2	5d
	CD8-Trm-Like	0	1	TM	Th2	5d
	Th17-2	0	1	TM	Th2	5d
	OX40/EBI3-Activation	0	1	TM	Th2	5d
	TXNIP/H1FX	0	1	TM	Th2	5d
	CD40LG/TXNIP	0	1	TM	Th2	5d
	Tph	0	1	TM	Th2	5d
	MALAT1	0.557347	1	TM	Th2	5d
	CD8-Naive	0	1	TM	Th2	5d
	CellCycle-G2M	0	1	TM	Th2	5d
	Th17	0	1	TM	Th2	5d
	HLA	0	1	TM	Th2	5d
	Treg	0	1	TM	Th2	5d
Th2 5d TN
	GEP	OR	P	start	condition	time
	Th2-2	10.4305	4.65873e-11	TN	Th2	5d
	Doublet-Fibroblast	3.33958	2.02733e-07	TN	Th2	5d
	Th2-1	5.65032	1.82833e-06	TN	Th2	5d
	Tfh-2	5.90444	2.9387e-06	TN	Th2	5d
	Tph	4.30118	5.51149e-05	TN	Th2	5d
	MALAT1	0.225021	0.000341663	TN	Th2	5d
	SOX4/TOX2	3.55702	0.000507447	TN	Th2	5d
	IL10/IL19-Secretion	3.52475	0.00166542	TN	Th2	5d
	Mito	0	0.00501119	TN	Th2	5d
	CD8-Naive	3.16722	0.00539001	TN	Th2	5d
	OX40/EBI3-Activation	2.9515	0.0200334	TN	Th2	5d
	Doublet-Platelet	2.45451	0.0208985	TN	Th2	5d
	Treg	2.61878	0.0220156	TN	Th2	5d
	Doublet-Bcell	2.67535	0.0299117	TN	Th2	5d
	Multi-Cytokine	2.67535	0.0299117	TN	Th2	5d
	Tfh-1	2.15609	0.0308264	TN	Th2	5d
	ISG	0	0.0361592	TN	Th2	5d
	CD8-EM	2.26298	0.042057	TN	Th2	5d
	CD8-Trm-Like	2.36184	0.0486621	TN	Th2	5d
	CD4-Naive	0	0.0535096	TN	Th2	5d
	Doublet-Plasmablast	0	0.0542567	TN	Th2	5d
	CTLA4+/CD38+-Activation	2.86662	0.0575897	TN	Th2	5d
	Exhaustion	1.81075	0.09558	TN	Th2	5d
	CD4-EM	2.04731	0.106859	TN	Th2	5d
	TXNIP/H1FX	0.217543	0.141644	TN	Th2	5d
	Metallothionein	2.92945	0.157565	TN	Th2	5d
	Translation	0	0.184417	TN	Th2	5d
	YPEL5/JUNB	0.25427	0.192646	TN	Th2	5d
	MAIT	1.61637	0.248653	TN	Th2	5d
	CD40LG/TXNIP	0.266396	0.278941	TN	Th2	5d
	CellCycle-Late-S	0	0.28053	TN	Th2	5d
	Cytotoxic	1.49959	0.306147	TN	Th2	5d
	Th17-2	1.4619	0.403122	TN	Th2	5d
	Doublet-RBC	0	0.40887	TN	Th2	5d
	CD4-CM	0	0.421942	TN	Th2	5d
	HLA	1.67964	0.432134	TN	Th2	5d
	IEG2	0.559785	0.501388	TN	Th2	5d
	NK-like	1.37562	0.543237	TN	Th2	5d
	Doublet-Myeloid	0.714941	0.666428	TN	Th2	5d
	Th17	1.17902	0.744375	TN	Th2	5d
	HeatShock	1.09528	0.756379	TN	Th2	5d
	CCR10-Migration	1.061	0.762433	TN	Th2	5d
	BCL2-Survival	1.1063	0.786362	TN	Th2	5d
	RGCC/MYADM	0.711961	0.802672	TN	Th2	5d
	Cytoskeleton	0.796127	1	TN	Th2	5d
	CellCycle-S	0.93262	1	TN	Th2	5d
	ICOS/CD38-Activation	0.53561	1	TN	Th2	5d
	Early-Activation	0	1	TN	Th2	5d
	TIMD4/TIM3-Activation	0.617544	1	TN	Th2	5d
	IEG	0.819337	1	TN	Th2	5d
	gdT-Blood	0.760206	1	TN	Th2	5d
	CellCycle-G2M	0.525639	1	TN	Th2	5d
iTreg 16h TM
	GEP	OR	P	start	condition	time
	Doublet-Fibroblast	13.5755	9.75817e-05	TM	iTreg	16h
	Doublet-Myeloid	7.47889	0.0347097	TM	iTreg	16h
	Doublet-Bcell	8.48425	0.117393	TM	iTreg	16h
	CD8-Naive	7.42375	0.132827	TM	iTreg	16h
	SOX4/TOX2	5.96725	0.162151	TM	iTreg	16h
	Doublet-Platelet	5.81282	0.166041	TM	iTreg	16h
	ISG	0	1	TM	iTreg	16h
	Mito	0	1	TM	iTreg	16h
	Doublet-RBC	0	1	TM	iTreg	16h
	gdT-Blood	0	1	TM	iTreg	16h
	CellCycle-S	0	1	TM	iTreg	16h
	Cytotoxic	0	1	TM	iTreg	16h
	Early-Activation	0	1	TM	iTreg	16h
	CCR10-Migration	0	1	TM	iTreg	16h
	Th17	0	1	TM	iTreg	16h
	MAIT	0	1	TM	iTreg	16h
	Multi-Cytokine	0	1	TM	iTreg	16h
	HeatShock	0	1	TM	iTreg	16h
	HLA	0	1	TM	iTreg	16h
	NK-like	0	1	TM	iTreg	16h
	Metallothionein	0	1	TM	iTreg	16h
	CD4-CM	0	1	TM	iTreg	16h
	IEG	0	1	TM	iTreg	16h
	CD8-EM	0	1	TM	iTreg	16h
	IEG2	0	1	TM	iTreg	16h
	CD4-Naive	0	1	TM	iTreg	16h
	Cytoskeleton	0	1	TM	iTreg	16h
	Translation	0	1	TM	iTreg	16h
	MALAT1	0	1	TM	iTreg	16h
	Treg	0	1	TM	iTreg	16h
	CellCycle-G2M	0	1	TM	iTreg	16h
	RGCC/MYADM	0	1	TM	iTreg	16h
	TIMD4/TIM3-Activation	0	1	TM	iTreg	16h
	Doublet-Plasmablast	0	1	TM	iTreg	16h
	BCL2-Survival	0	1	TM	iTreg	16h
	IL10/IL19-Secretion	0	1	TM	iTreg	16h
	Th2-2	0	1	TM	iTreg	16h
	Th2-1	0	1	TM	iTreg	16h
	ICOS/CD38-Activation	0	1	TM	iTreg	16h
	Exhaustion	0	1	TM	iTreg	16h
	CTLA4+/CD38+-Activation	0	1	TM	iTreg	16h
	Th17-2	0	1	TM	iTreg	16h
	Tfh-2	0	1	TM	iTreg	16h
	OX40/EBI3-Activation	0	1	TM	iTreg	16h
	TXNIP/H1FX	0	1	TM	iTreg	16h
	YPEL5/JUNB	0	1	TM	iTreg	16h
	CD40LG/TXNIP	0	1	TM	iTreg	16h
	Tph	0	1	TM	iTreg	16h
	CD4-EM	0	1	TM	iTreg	16h
	CellCycle-Late-S	0	1	TM	iTreg	16h
	CD8-Trm-Like	0	1	TM	iTreg	16h
	Tfh-1	0	1	TM	iTreg	16h
iTreg 16h TN
	GEP	OR	P	start	condition	time
	CellCycle-G2M			TN	iTreg	16h
	Translation			TN	iTreg	16h
	HLA			TN	iTreg	16h
	ISG			TN	iTreg	16h
	Mito			TN	iTreg	16h
	Doublet-RBC			TN	iTreg	16h
	gdT-Blood			TN	iTreg	16h
	CellCycle-S			TN	iTreg	16h
	Cytotoxic			TN	iTreg	16h
	Doublet-Platelet			TN	iTreg	16h
	Early-Activation			TN	iTreg	16h
	CCR10-Migration			TN	iTreg	16h
	MAIT			TN	iTreg	16h
	CellCycle-Late-S			TN	iTreg	16h
	Cytoskeleton			TN	iTreg	16h
	HeatShock			TN	iTreg	16h
	Multi-Cytokine			TN	iTreg	16h
	NK-like			TN	iTreg	16h
	Doublet-Myeloid			TN	iTreg	16h
	Metallothionein			TN	iTreg	16h
	CD4-CM			TN	iTreg	16h
	IEG			TN	iTreg	16h
	CD8-EM			TN	iTreg	16h
	IEG2			TN	iTreg	16h
	CD4-Naive			TN	iTreg	16h
	Treg			TN	iTreg	16h
	Th17			TN	iTreg	16h
	MALAT1			TN	iTreg	16h
	CD8-Naive			TN	iTreg	16h
	RGCC/MYADM			TN	iTreg	16h
	TIMD4/TIM3-Activation			TN	iTreg	16h
	Doublet-Plasmablast			TN	iTreg	16h
	BCL2-Survival			TN	iTreg	16h
	IL10/IL19-Secretion			TN	iTreg	16h
	Th2-2			TN	iTreg	16h
	Th2-1			TN	iTreg	16h
	ICOS/CD38-Activation			TN	iTreg	16h
	Doublet-Bcell			TN	iTreg	16h
	CD4-EM			TN	iTreg	16h
	CTLA4+/CD38+-Activation			TN	iTreg	16h
	CD8-Trm-Like			TN	iTreg	16h
	Th17-2			TN	iTreg	16h
	Tfh-2			TN	iTreg	16h
	OX40/EBI3-Activation			TN	iTreg	16h
	TXNIP/H1FX			TN	iTreg	16h
	YPEL5/JUNB			TN	iTreg	16h
	Doublet-Fibroblast			TN	iTreg	16h
	SOX4/TOX2			TN	iTreg	16h
	CD40LG/TXNIP			TN	iTreg	16h
	Tph			TN	iTreg	16h
	Exhaustion			TN	iTreg	16h
	Tfh-1			TN	iTreg	16h
iTreg 5d TM
	GEP	OR	P	start	condition	time
	Doublet-Fibroblast	4.17524	6.34763e-18	TM	iTreg	5d
	MALAT1	0.118095	6.71841e-10	TM	iTreg	5d
	Tfh-2	4.89219	2.1996e-07	TM	iTreg	5d
	OX40/EBI3-Activation	4.24692	9.97234e-06	TM	iTreg	5d
	Doublet-Myeloid	2.36661	0.000342932	TM	iTreg	5d
	Doublet-Platelet	2.71235	0.000633417	TM	iTreg	5d
	Th2-1	2.93149	0.00101807	TM	iTreg	5d
	Metallothionein	5.18923	0.00187705	TM	iTreg	5d
	Mito	0.176386	0.0026079	TM	iTreg	5d
	TXNIP/H1FX	0.114689	0.00386553	TM	iTreg	5d
	CCR10-Migration	2.3976	0.00694412	TM	iTreg	5d
	Th2-2	2.78384	0.00769706	TM	iTreg	5d
	TIMD4/TIM3-Activation	2.8505	0.0102579	TM	iTreg	5d
	Multi-Cytokine	2.42544	0.0120855	TM	iTreg	5d
	Th17-2	2.90152	0.0145496	TM	iTreg	5d
	Tfh-1	1.98241	0.0146512	TM	iTreg	5d
	Translation	0	0.0157542	TM	iTreg	5d
	CD4-Naive	0.148967	0.0240041	TM	iTreg	5d
	Tph	2.03264	0.029728	TM	iTreg	5d
	CD8-Trm-Like	2.13324	0.0322837	TM	iTreg	5d
	CellCycle-Late-S	0	0.0356776	TM	iTreg	5d
	CellCycle-S	0	0.0359851	TM	iTreg	5d
	CellCycle-G2M	0	0.0525485	TM	iTreg	5d
	CTLA4+/CD38+-Activation	2.32347	0.0537619	TM	iTreg	5d
	Th17	1.95866	0.0580441	TM	iTreg	5d
	SOX4/TOX2	1.85046	0.0594211	TM	iTreg	5d
	Doublet-Plasmablast	0.292474	0.0713739	TM	iTreg	5d
	Treg	1.78997	0.108947	TM	iTreg	5d
	Cytoskeleton	0.418631	0.171007	TM	iTreg	5d
	NK-like	0.355794	0.1847	TM	iTreg	5d
	YPEL5/JUNB	0.546119	0.335374	TM	iTreg	5d
	HLA	1.5063	0.394	TM	iTreg	5d
	IEG2	1.23069	0.417203	TM	iTreg	5d
	CD40LG/TXNIP	1.3302	0.42986	TM	iTreg	5d
	Doublet-Bcell	1.40129	0.454941	TM	iTreg	5d
	CD4-EM	1.29982	0.475113	TM	iTreg	5d
	IL10/IL19-Secretion	0.583502	0.49475	TM	iTreg	5d
	HeatShock	0.575963	0.495723	TM	iTreg	5d
	MAIT	1.20414	0.529311	TM	iTreg	5d
	CD8-EM	0.662046	0.532401	TM	iTreg	5d
	RGCC/MYADM	1.16293	0.582751	TM	iTreg	5d
	IEG	0.727308	0.692513	TM	iTreg	5d
	ISG	1.10399	0.704297	TM	iTreg	5d
	Exhaustion	1.06991	0.726536	TM	iTreg	5d
	Doublet-RBC	1.08652	0.757348	TM	iTreg	5d
	CD8-Naive	1.00844	0.820935	TM	iTreg	5d
	Early-Activation	0	1	TM	iTreg	5d
	BCL2-Survival	0.882755	1	TM	iTreg	5d
	gdT-Blood	0.955659	1	TM	iTreg	5d
	CD4-CM	0.938776	1	TM	iTreg	5d
	ICOS/CD38-Activation	0.866214	1	TM	iTreg	5d
	Cytotoxic	0.921754	1	TM	iTreg	5d
iTreg 5d TN
	GEP	OR	P	start	condition	time
	Tfh-2	8.2561	3.79191e-12	TN	iTreg	5d
	MALAT1	0.122552	2.14914e-07	TN	iTreg	5d
	Th17-2	5.35383	0.000106428	TN	iTreg	5d
	Doublet-Fibroblast	2.29166	0.000204598	TN	iTreg	5d
	Th2-2	4.35774	0.00021313	TN	iTreg	5d
	OX40/EBI3-Activation	3.73772	0.000652776	TN	iTreg	5d
	CD8-Trm-Like	3.29738	0.000946624	TN	iTreg	5d
	Multi-Cytokine	3.37688	0.00133674	TN	iTreg	5d
	Th2-1	3.05678	0.00264319	TN	iTreg	5d
	Th17	3.05678	0.00264319	TN	iTreg	5d
	MAIT	2.71481	0.00391845	TN	iTreg	5d
	Treg	2.7918	0.00481662	TN	iTreg	5d
	Mito	0.121619	0.00561753	TN	iTreg	5d
	ISG	0	0.00727859	TN	iTreg	5d
	Cytoskeleton	0	0.0110011	TN	iTreg	5d
	Tfh-1	2.06933	0.0159926	TN	iTreg	5d
	CD40LG/TXNIP	2.07125	0.0355865	TN	iTreg	5d
	Doublet-Bcell	2.29355	0.0402566	TN	iTreg	5d
	Doublet-Myeloid	1.77658	0.058849	TN	iTreg	5d
	CCR10-Migration	2.15223	0.0600904	TN	iTreg	5d
	TIMD4/TIM3-Activation	2.3777	0.0679528	TN	iTreg	5d
	Metallothionein	3.29823	0.0711511	TN	iTreg	5d
	Translation	0	0.0851061	TN	iTreg	5d
	Doublet-Plasmablast	0.201262	0.0986702	TN	iTreg	5d
	CellCycle-Late-S	0	0.123435	TN	iTreg	5d
	CellCycle-S	0	0.124358	TN	iTreg	5d
	Tph	1.74397	0.134259	TN	iTreg	5d
	CTLA4+/CD38+-Activation	2.08885	0.135278	TN	iTreg	5d
	CD4-CM	0	0.178391	TN	iTreg	5d
	CD8-Naive	1.69498	0.180382	TN	iTreg	5d
	CellCycle-G2M	0	0.188458	TN	iTreg	5d
	IEG2	1.41386	0.253751	TN	iTreg	5d
	Doublet-RBC	0	0.272866	TN	iTreg	5d
	TXNIP/H1FX	0.482361	0.297361	TN	iTreg	5d
	HLA	1.65281	0.31531	TN	iTreg	5d
	YPEL5/JUNB	1.35316	0.373026	TN	iTreg	5d
	CD4-EM	1.49068	0.397044	TN	iTreg	5d
	IEG	0.597463	0.495295	TN	iTreg	5d
	HeatShock	0.527949	0.593653	TN	iTreg	5d
	NK-like	1.26324	0.604087	TN	iTreg	5d
	CD8-EM	1.1571	0.626262	TN	iTreg	5d
	Doublet-Platelet	0.644383	0.634433	TN	iTreg	5d
	CD4-Naive	0.627953	0.636204	TN	iTreg	5d
	gdT-Blood	1.13096	0.659435	TN	iTreg	5d
	ICOS/CD38-Activation	1.20116	0.741536	TN	iTreg	5d
	Cytotoxic	1.09101	0.826264	TN	iTreg	5d
	RGCC/MYADM	1.05828	0.829447	TN	iTreg	5d
	Early-Activation	0	1	TN	iTreg	5d
	Exhaustion	0.974618	1	TN	iTreg	5d
	BCL2-Survival	0.806108	1	TN	iTreg	5d
	SOX4/TOX2	0.888859	1	TN	iTreg	5d
	IL10/IL19-Secretion	0.80915	1	TN	iTreg	5d
iTreg vs TM
	GEP	OR	P	start	condition	time
	Th2-1	31.1416	0.00269808	TM	iTreg	vs
	Th2-2	19.3396	0.0556434	TM	iTreg	vs
	OX40/EBI3-Activation	16.7902	0.0637175	TM	iTreg	vs
	Th17	13.9177	0.0762077	TM	iTreg	vs
	IL10/IL19-Secretion	13.109	0.080667	TM	iTreg	vs
	CCR10-Migration	12.5417	0.0841218	TM	iTreg	vs
	Doublet-Fibroblast	3.77331	0.25038	TM	iTreg	vs
	Mito	0	1	TM	iTreg	vs
	Doublet-RBC	0	1	TM	iTreg	vs
	gdT-Blood	0	1	TM	iTreg	vs
	CellCycle-S	0	1	TM	iTreg	vs
	Cytotoxic	0	1	TM	iTreg	vs
	Doublet-Platelet	0	1	TM	iTreg	vs
	Early-Activation	0	1	TM	iTreg	vs
	Exhaustion	0	1	TM	iTreg	vs
	MAIT	0	1	TM	iTreg	vs
	NK-like	0	1	TM	iTreg	vs
	HeatShock	0	1	TM	iTreg	vs
	Multi-Cytokine	0	1	TM	iTreg	vs
	ISG	0	1	TM	iTreg	vs
	Doublet-Myeloid	0	1	TM	iTreg	vs
	Metallothionein	0	1	TM	iTreg	vs
	CD4-CM	0	1	TM	iTreg	vs
	IEG	0	1	TM	iTreg	vs
	CD8-EM	0	1	TM	iTreg	vs
	IEG2	0	1	TM	iTreg	vs
	Cytoskeleton	0	1	TM	iTreg	vs
	HLA	0	1	TM	iTreg	vs
	CTLA4+/CD38+-Activation	0	1	TM	iTreg	vs
	CD4-Naive	0	1	TM	iTreg	vs
	CD8-Naive	0	1	TM	iTreg	vs
	RGCC/MYADM	0	1	TM	iTreg	vs
	TIMD4/TIM3-Activation	0	1	TM	iTreg	vs
	Doublet-Plasmablast	0	1	TM	iTreg	vs
	BCL2-Survival	0	1	TM	iTreg	vs
	ICOS/CD38-Activation	0	1	TM	iTreg	vs
	Doublet-Bcell	0	1	TM	iTreg	vs
	CellCycle-G2M	0	1	TM	iTreg	vs
	MALAT1	0	1	TM	iTreg	vs
	Translation	0	1	TM	iTreg	vs
	CD8-Trm-Like	0	1	TM	iTreg	vs
	Tfh-2	0	1	TM	iTreg	vs
	TXNIP/H1FX	0	1	TM	iTreg	vs
	YPEL5/JUNB	0	1	TM	iTreg	vs
	SOX4/TOX2	0	1	TM	iTreg	vs
	CD40LG/TXNIP	0	1	TM	iTreg	vs
	Tph	0	1	TM	iTreg	vs
	CD4-EM	0	1	TM	iTreg	vs
	CellCycle-Late-S	0	1	TM	iTreg	vs
	Treg	0	1	TM	iTreg	vs
	Th17-2	0	1	TM	iTreg	vs
	Tfh-1	0	1	TM	iTreg	vs
iTreg vs TN
	GEP	OR	P	start	condition	time
	Tfh-2	14.3714	3.68861e-15	TN	iTreg	vs
	Treg	10.6028	1.9533e-12	TN	iTreg	vs
	IL10/IL19-Secretion	10.1874	1.37316e-11	TN	iTreg	vs
	BCL2-Survival	7.37046	1.34985e-09	TN	iTreg	vs
	Th2-1	7.25359	3.69729e-07	TN	iTreg	vs
	ISG	5.45271	1.06137e-06	TN	iTreg	vs
	CTLA4+/CD38+-Activation	9.77542	1.06378e-06	TN	iTreg	vs
	Exhaustion	5.02624	1.17862e-06	TN	iTreg	vs
	CD4-EM	6.72171	2.19965e-06	TN	iTreg	vs
	TIMD4/TIM3-Activation	8.72418	2.52037e-06	TN	iTreg	vs
	Tfh-1	3.68476	0.000211933	TN	iTreg	vs
	CD8-EM	4.14492	0.000556043	TN	iTreg	vs
	CD4-Naive	3.7965	0.0010035	TN	iTreg	vs
	NK-like	3.98953	0.00138526	TN	iTreg	vs
	CD40LG/TXNIP	3.57105	0.00150215	TN	iTreg	vs
	CD4-CM	5.18843	0.00153806	TN	iTreg	vs
	Tph	3.86913	0.00166441	TN	iTreg	vs
	MAIT	3.71218	0.00212806	TN	iTreg	vs
	Th17	3.99893	0.0026551	TN	iTreg	vs
	CD8-Trm-Like	3.88784	0.00308054	TN	iTreg	vs
	Cytotoxic	2.83799	0.00972848	TN	iTreg	vs
	ICOS/CD38-Activation	3.92486	0.011163	TN	iTreg	vs
	MALAT1	1.79641	0.0169361	TN	iTreg	vs
	OX40/EBI3-Activation	3.39	0.0193495	TN	iTreg	vs
	Multi-Cytokine	3.07525	0.0275694	TN	iTreg	vs
	Doublet-Bcell	3.07525	0.0275694	TN	iTreg	vs
	Th2-2	3.09701	0.045538	TN	iTreg	vs
	gdT-Blood	2.16958	0.0664168	TN	iTreg	vs
	SOX4/TOX2	2.14342	0.0924353	TN	iTreg	vs
	CD8-Naive	2.12168	0.128089	TN	iTreg	vs
	RGCC/MYADM	2.03017	0.130959	TN	iTreg	vs
	HeatShock	2.05273	0.139165	TN	iTreg	vs
	YPEL5/JUNB	1.82589	0.208039	TN	iTreg	vs
	Th17-2	2.03135	0.264641	TN	iTreg	vs
	IEG2	1.59198	0.288058	TN	iTreg	vs
	Doublet-RBC	1.8857	0.292468	TN	iTreg	vs
	Doublet-Myeloid	1.51504	0.3026	TN	iTreg	vs
	Doublet-Platelet	1.65412	0.314804	TN	iTreg	vs
	Doublet-Fibroblast	1.36818	0.322034	TN	iTreg	vs
	Mito	1.43624	0.32311	TN	iTreg	vs
	CellCycle-Late-S	0	0.411447	TN	iTreg	vs
	CellCycle-S	0	0.411994	TN	iTreg	vs
	Translation	0	0.430134	TN	iTreg	vs
	CCR10-Migration	1.47592	0.463346	TN	iTreg	vs
	Doublet-Plasmablast	0.382538	0.526333	TN	iTreg	vs
	Cytoskeleton	0.362858	0.530878	TN	iTreg	vs
	CellCycle-G2M	0	0.64933	TN	iTreg	vs
	IEG	1.13976	0.749634	TN	iTreg	vs
	Early-Activation	0	1	TN	iTreg	vs
	Metallothionein	0	1	TN	iTreg	vs
	HLA	0.75782	1	TN	iTreg	vs
	TXNIP/H1FX	0.920211	1	TN	iTreg	vs
stim 16h TM
	GEP	OR	P	start	condition	time
	OX40/EBI3-Activation	14.7933	1.75568e-45	TM	stim	16h
	Multi-Cytokine	8.35079	6.40541e-31	TM	stim	16h
	CellCycle-S	8.31934	1.84319e-28	TM	stim	16h
	IEG2	3.6132	7.14665e-22	TM	stim	16h
	Exhaustion	3.84403	4.1868e-21	TM	stim	16h
	Tph	4.16662	1.04346e-16	TM	stim	16h
	HeatShock	4.26768	6.64027e-16	TM	stim	16h
	YPEL5/JUNB	3.43474	3.5832e-15	TM	stim	16h
	Tfh-2	4.62565	4.96675e-15	TM	stim	16h
	Cytoskeleton	3.35739	3.01792e-14	TM	stim	16h
	Mito	0.143989	3.84039e-12	TM	stim	16h
	TXNIP/H1FX	0.106713	9.23595e-11	TM	stim	16h
	Early-Activation	inf	1.28099e-10	TM	stim	16h
	IEG	2.78989	8.23211e-10	TM	stim	16h
	Doublet-Plasmablast	0.135651	6.38648e-08	TM	stim	16h
	ISG	2.30679	5.12636e-07	TM	stim	16h
	CellCycle-Late-S	2.77511	3.28792e-06	TM	stim	16h
	RGCC/MYADM	2.10646	5.60819e-06	TM	stim	16h
	CellCycle-G2M	2.64584	2.96387e-05	TM	stim	16h
	CTLA4+/CD38+-Activation	2.94984	3.73886e-05	TM	stim	16h
	CD4-Naive	0.284535	4.08225e-05	TM	stim	16h
	Treg	2.15393	0.000111169	TM	stim	16h
	ICOS/CD38-Activation	2.46753	0.00018197	TM	stim	16h
	TIMD4/TIM3-Activation	2.55813	0.000211259	TM	stim	16h
	Doublet-Myeloid	0.455448	0.000245219	TM	stim	16h
	Translation	0.24919	0.000325087	TM	stim	16h
	MALAT1	0.681641	0.000454754	TM	stim	16h
	BCL2-Survival	1.84786	0.000737395	TM	stim	16h
	Metallothionein	3.22276	0.00114559	TM	stim	16h
	Doublet-RBC	0.164059	0.00161371	TM	stim	16h
	HLA	2.05937	0.00305485	TM	stim	16h
	Tfh-1	1.56521	0.00613843	TM	stim	16h
	CD40LG/TXNIP	1.6593	0.00664242	TM	stim	16h
	Doublet-Platelet	0.529581	0.0172313	TM	stim	16h
	Th2-2	1.79713	0.018776	TM	stim	16h
	Th17-2	1.8723	0.0272293	TM	stim	16h
	SOX4/TOX2	0.544694	0.027828	TM	stim	16h
	Doublet-Fibroblast	0.742693	0.0471472	TM	stim	16h
	Doublet-Bcell	0.551673	0.0686674	TM	stim	16h
	Th2-1	1.40992	0.134526	TM	stim	16h
	CD8-Naive	0.690077	0.22253	TM	stim	16h
	Th17	1.27524	0.265432	TM	stim	16h
	CCR10-Migration	1.24651	0.289882	TM	stim	16h
	Cytotoxic	0.784834	0.322465	TM	stim	16h
	NK-like	0.767083	0.353556	TM	stim	16h
	MAIT	1.20712	0.369352	TM	stim	16h
	CD8-EM	1.184	0.435511	TM	stim	16h
	CD8-Trm-Like	1.10979	0.624526	TM	stim	16h
	CD4-CM	1.04589	0.879167	TM	stim	16h
	IL10/IL19-Secretion	1.00992	0.904411	TM	stim	16h
	CD4-EM	0.980288	1	TM	stim	16h
	gdT-Blood	0.973017	1	TM	stim	16h
stim 16h TN
	GEP	OR	P	start	condition	time
	OX40/EBI3-Activation	9.45294	1.35199e-32	TN	stim	16h
	CellCycle-S	8.94972	2.68072e-31	TN	stim	16h
	Multi-Cytokine	6.69627	1.90383e-25	TN	stim	16h
	Cytoskeleton	4.04659	1.53429e-20	TN	stim	16h
	YPEL5/JUNB	3.94174	3.2073e-20	TN	stim	16h
	IEG2	3.30936	4.51457e-20	TN	stim	16h
	HeatShock	4.38281	1.80544e-17	TN	stim	16h
	Mito	0.0872656	1.01283e-16	TN	stim	16h
	CellCycle-G2M	5.08012	3.46932e-15	TN	stim	16h
	Exhaustion	3.05143	5.28631e-15	TN	stim	16h
	Tfh-2	4.07298	2.93705e-13	TN	stim	16h
	IEG	3.11432	6.59369e-13	TN	stim	16h
	CellCycle-Late-S	3.69978	6.83157e-11	TN	stim	16h
	Early-Activation	inf	5.70483e-10	TN	stim	16h
	Doublet-Plasmablast	0.115919	1.4811e-09	TN	stim	16h
	Tph	2.8171	3.44631e-09	TN	stim	16h
	RGCC/MYADM	2.4406	5.70484e-09	TN	stim	16h
	Doublet-Fibroblast	0.42138	3.10862e-08	TN	stim	16h
	TXNIP/H1FX	0.308238	1.28703e-06	TN	stim	16h
	CD4-Naive	0.243102	2.38877e-06	TN	stim	16h
	ICOS/CD38-Activation	2.77461	5.17555e-06	TN	stim	16h
	MALAT1	0.639394	1.75157e-05	TN	stim	16h
	Doublet-Platelet	0.315652	3.83345e-05	TN	stim	16h
	Translation	0.257505	0.000109845	TN	stim	16h
	Doublet-Myeloid	0.473648	0.000155459	TN	stim	16h
	CTLA4+/CD38+-Activation	2.51859	0.000269654	TN	stim	16h
	Treg	1.96796	0.000436698	TN	stim	16h
	Tfh-1	1.67624	0.00075504	TN	stim	16h
	HLA	2.16138	0.00113315	TN	stim	16h
	TIMD4/TIM3-Activation	2.06556	0.00434656	TN	stim	16h
	BCL2-Survival	1.62225	0.00562695	TN	stim	16h
	Doublet-Bcell	0.420667	0.0067393	TN	stim	16h
	ISG	1.56164	0.00987229	TN	stim	16h
	Metallothionein	2.45294	0.012678	TN	stim	16h
	SOX4/TOX2	0.538214	0.0168506	TN	stim	16h
	Th2-1	1.63825	0.0183064	TN	stim	16h
	Doublet-RBC	0.442414	0.045779	TN	stim	16h
	CD40LG/TXNIP	1.4154	0.0500886	TN	stim	16h
	Th17-2	1.72127	0.0538772	TN	stim	16h
	NK-like	0.655125	0.10094	TN	stim	16h
	Cytotoxic	0.701523	0.111966	TN	stim	16h
	gdT-Blood	0.729641	0.15433	TN	stim	16h
	CD8-Naive	0.683964	0.167657	TN	stim	16h
	Th2-2	1.36193	0.214545	TN	stim	16h
	IL10/IL19-Secretion	1.28631	0.25346	TN	stim	16h
	CCR10-Migration	1.27303	0.263846	TN	stim	16h
	Th17	1.26261	0.290353	TN	stim	16h
	CD8-EM	1.14608	0.46381	TN	stim	16h
	CD8-Trm-Like	1.16552	0.486962	TN	stim	16h
	MAIT	1.07595	0.673267	TN	stim	16h
	CD4-CM	1.05632	0.77599	TN	stim	16h
	CD4-EM	0.945847	0.905912	TN	stim	16h
stim 5d TM
	GEP	OR	P	start	condition	time
	CellCycle-S	63.6455	3.01207e-82	TM	stim	5d
	CellCycle-Late-S	41.3341	5.54118e-73	TM	stim	5d
	CellCycle-G2M	49.7983	2.39079e-68	TM	stim	5d
	OX40/EBI3-Activation	10.2211	8.58909e-35	TM	stim	5d
	ISG	5.72923	3.4081e-34	TM	stim	5d
	Exhaustion	4.8129	3.02294e-31	TM	stim	5d
	Tph	5.63568	1.84495e-26	TM	stim	5d
	Multi-Cytokine	5.30918	2.13765e-19	TM	stim	5d
	Cytoskeleton	3.47967	4.2031e-16	TM	stim	5d
	Tfh-2	3.9772	9.02135e-13	TM	stim	5d
	Mito	0.179022	2.12381e-12	TM	stim	5d
	IEG2	2.49039	2.02639e-11	TM	stim	5d
	CTLA4+/CD38+-Activation	4.7409	4.66192e-11	TM	stim	5d
	TIMD4/TIM3-Activation	4.35064	8.71411e-11	TM	stim	5d
	Early-Activation	inf	5.27746e-10	TM	stim	5d
	HLA	3.706	1.57598e-09	TM	stim	5d
	MALAT1	0.532768	7.77544e-09	TM	stim	5d
	Doublet-Plasmablast	0.146889	1.0154e-08	TM	stim	5d
	TXNIP/H1FX	0.21141	1.0686e-08	TM	stim	5d
	HeatShock	2.84761	1.729e-08	TM	stim	5d
	Metallothionein	6.29857	2.73318e-08	TM	stim	5d
	Doublet-Myeloid	0.309072	8.39851e-08	TM	stim	5d
	Translation	0.0839607	1.17039e-07	TM	stim	5d
	ICOS/CD38-Activation	3.17902	1.83434e-07	TM	stim	5d
	Th2-2	2.92132	1.26928e-06	TM	stim	5d
	BCL2-Survival	2.19083	2.50288e-06	TM	stim	5d
	Th17-2	3.23187	3.11383e-06	TM	stim	5d
	RGCC/MYADM	1.98575	1.76213e-05	TM	stim	5d
	Treg	2.26118	2.11425e-05	TM	stim	5d
	IEG	2.01843	4.17051e-05	TM	stim	5d
	IL10/IL19-Secretion	2.19468	4.78885e-05	TM	stim	5d
	CD4-Naive	0.342776	0.000102416	TM	stim	5d
	YPEL5/JUNB	1.87466	0.000160536	TM	stim	5d
	Tfh-1	1.7635	0.00019146	TM	stim	5d
	CD8-Trm-Like	2.0721	0.000260365	TM	stim	5d
	CCR10-Migration	1.87189	0.00111607	TM	stim	5d
	CD40LG/TXNIP	1.6526	0.00417336	TM	stim	5d
	Doublet-RBC	2.05759	0.00521571	TM	stim	5d
	Th17	1.71909	0.00914963	TM	stim	5d
	MAIT	1.63459	0.0103358	TM	stim	5d
	Doublet-Platelet	1.58538	0.01351	TM	stim	5d
	NK-like	1.60937	0.0152033	TM	stim	5d
	Doublet-Bcell	0.527206	0.0362812	TM	stim	5d
	CD8-Naive	0.641658	0.106741	TM	stim	5d
	CD4-CM	1.51305	0.112224	TM	stim	5d
	Cytotoxic	1.3019	0.133736	TM	stim	5d
	gdT-Blood	1.20147	0.295649	TM	stim	5d
	CD4-EM	0.79074	0.407097	TM	stim	5d
	Th2-1	1.21377	0.409237	TM	stim	5d
	SOX4/TOX2	1.15695	0.467586	TM	stim	5d
	CD8-EM	1.10955	0.5985	TM	stim	5d
	Doublet-Fibroblast	1.0228	0.851096	TM	stim	5d
stim 5d TN
	GEP	OR	P	start	condition	time
	CellCycle-Late-S	35.7308	1.82171e-67	TN	stim	5d
	CellCycle-G2M	43.0654	2.48194e-63	TN	stim	5d
	CellCycle-S	27.751	2.99024e-62	TN	stim	5d
	Exhaustion	5.6923	2.68848e-40	TN	stim	5d
	Tph	7.98438	1.38582e-39	TN	stim	5d
	OX40/EBI3-Activation	11.4113	3.65055e-38	TN	stim	5d
	Tfh-2	6.6385	3.95106e-25	TN	stim	5d
	ISG	4.36075	8.05303e-25	TN	stim	5d
	Multi-Cytokine	5.67263	1.00452e-21	TN	stim	5d
	MALAT1	0.361997	1.68304e-19	TN	stim	5d
	TIMD4/TIM3-Activation	5.83567	5.30928e-16	TN	stim	5d
	Mito	0.139284	9.53675e-16	TN	stim	5d
	RGCC/MYADM	3.06623	5.49118e-15	TN	stim	5d
	Treg	3.74469	1.24622e-14	TN	stim	5d
	IEG2	2.71865	1.37338e-14	TN	stim	5d
	CTLA4+/CD38+-Activation	5.7568	2.15602e-14	TN	stim	5d
	Th2-2	4.2582	2.58739e-12	TN	stim	5d
	HeatShock	3.35235	4.29274e-12	TN	stim	5d
	Tfh-1	2.56159	1.02225e-11	TN	stim	5d
	CD8-Trm-Like	3.23278	5.30257e-11	TN	stim	5d
	IL10/IL19-Secretion	3.06861	2.5283e-10	TN	stim	5d
	HLA	3.77035	3.20788e-10	TN	stim	5d
	TXNIP/H1FX	0.204675	4.91521e-10	TN	stim	5d
	Cytoskeleton	2.605	6.48689e-10	TN	stim	5d
	Translation	0.0361651	6.48767e-10	TN	stim	5d
	CCR10-Migration	2.94302	6.59766e-10	TN	stim	5d
	BCL2-Survival	2.62225	1.13333e-09	TN	stim	5d
	IEG	2.6035	1.24687e-09	TN	stim	5d
	ICOS/CD38-Activation	3.37466	1.43559e-08	TN	stim	5d
	CD4-Naive	0.18507	2.04173e-08	TN	stim	5d
	Th17-2	3.85516	2.09662e-08	TN	stim	5d
	Metallothionein	6.02692	3.90334e-08	TN	stim	5d
	Doublet-Plasmablast	0.20725	5.47233e-08	TN	stim	5d
	Th17	2.74835	5.71969e-08	TN	stim	5d
	NK-like	2.50042	1.65925e-07	TN	stim	5d
	YPEL5/JUNB	2.19981	5.26647e-07	TN	stim	5d
	CD40LG/TXNIP	2.14673	2.09135e-06	TN	stim	5d
	Th2-1	2.35313	5.51301e-06	TN	stim	5d
	Cytotoxic	1.91326	3.48206e-05	TN	stim	5d
	Early-Activation	13.8346	4.86359e-05	TN	stim	5d
	MAIT	1.97539	0.000104812	TN	stim	5d
	Doublet-Platelet	1.88303	0.000194728	TN	stim	5d
	CD4-CM	2.26197	0.000492381	TN	stim	5d
	CD4-EM	1.78208	0.0043283	TN	stim	5d
	SOX4/TOX2	1.65116	0.00542792	TN	stim	5d
	CD8-EM	1.62357	0.00666783	TN	stim	5d
	Doublet-Fibroblast	1.26309	0.0370767	TN	stim	5d
	CD8-Naive	0.598243	0.0482831	TN	stim	5d
	gdT-Blood	1.31997	0.102415	TN	stim	5d
	Doublet-Bcell	0.645463	0.126685	TN	stim	5d
	Doublet-Myeloid	0.776438	0.14634	TN	stim	5d
	Doublet-RBC	0.758417	0.464398	TN	stim	5d

## Sheet: S4 - Cell Quality Correlation
Table S4. Correlation with cell quality features. Each tab includes the Pearson correlation of each cGEP’s usage (rows) with different per-cell quality features for each dataset (columns). MitoFrac denotes the % of unique molecular identifiers from MT- genes. RNA_Detected denotes the number of unique genes detected per cell. RNA_Count denotes the number of unique molecular identifiers per cell. P…
Mito Fraction
		AMP-RA	COMBAT	HIV-Vaccine	Pan-Cancer	Pan-Tissue	TBRU	UK-Covid
	Mito	0.814526	0.699768	0.819336	0.830329	0.877929	0.80966	0.827888
	Poor-Quality	0.266278	0.435817	0.124315	0.110386	0.292546	0.36613	0.154843
	Doublet-Myeloid	0.129638	0.132848	0.422788	0.017526	0.123857	0.00904483	0.130576
	gdT	0.0442434	0.0960642	0.308608	0.108863	0.195646	0.0833008	0.0724233
	Doublet-Fibroblast	0.227045	0.0662241	0.103466	0.00618908	0.300603	0.0590342	0.11503
	Doublet-Plasmablast	0.194873	0.0967625	0.0357606	0.159096	0.149003	0.0559313	0.134801
	CD8-Trm	0.0667583	0.115013	0.234674	0.110307	0.135078	0.0776334	0.0845664
	Th1-Like	0.123927	0.0830172	0.15893	0.0913105	0.226426	0.0246026	0.107243
	TEMRA	0.00107605	0.0965303	0.241266	0.0783541	0.118411	0.0582564	0.00144025
	CD8-EM	0.0340251	0.136373	0.170276	-0.00661876	0.171152	0.0533984	0.0322103
	Cytotoxic	-0.0408528	0.103968	0.227435	0.112947	0.211593	0.0637707	-0.10874
	Multi-Cytokine	-0.0067588	0.100207	0.202367	0.0365431	0.0186903	0.0740179	-0.0471711
	MAIT	0.0557839	0.0686961	0.143051	-0.0558904	0.00338989	0.063142	0.0759508
	IEG2	-0.0826406	0.0139013	0.172805	0.184564	-0.0926919	0.0963914	-0.00196676
	Doublet-Bcell	0.0544079	0.0394676	0.0496185	0.0352426	0.0133519	0.00396043	0.0387647
	Tph	-0.0370336	0.071359	0.186128	-0.0829026	0.0511389	0.0481358	-0.0277491
	IL10/IL19	0.0419672	0.0651295	-0.00909447	-0.00251242	-0.00758875	-0.00658996	0.0390362
	TIMD4/TIM3	-0.0871917	0.0927597	0.148717	-0.128238	0.0446945	0.0157518	-0.0271071
	CellCycle-G2M	-0.046988	0.059763	0.0241069	-0.0662229	0.0192523	0.0245877	0.0190608
	Doublet-Platelet	0.0293631	0.00491161	0.0187634	-0.000691403	-0.00663791	-0.0166835	0.00346218
	CellCycle-Late-S	-0.0257481	0.0538272	0.0137408	-0.0646337	0.0119144	0.0137238	0.0200797
	CellCycle-S	-0.0388884	0.0739504	0.0063716	-0.0626603	0.0168663	0.0139857	-0.00956474
	Metallothionein	-0.031726	-0.0147436	-0.0164497	9.46883e-05	0.0457188	-0.00757516	-0.00512859
	Th2-Activated	-0.0231802	-0.0134562	-0.00947172	-0.00915928	0.0174573	-0.00384243	0.010299
	RGCC/MYADM	-0.0169257	-0.0134225	0.0670631	0.102448	-0.0630696	-0.0461869	-0.0632329
	Th17-Activated	-0.0251397	0.0156149	0.0307462	-0.0656579	0.000450069	0.00562099	0.00101679
	Doublet-RBC	-0.0108933	-0.00222685	-0.0213242	-0.00559917	-0.0254387	-0.00709426	0.00395379
	Exhaustion	-0.0527779	0.0570288	0.172678	-0.0762364	-0.0307383	-0.00194685	-0.141967
	HLA	-0.0839121	0.0270638	0.211198	-0.119492	0.0261541	-0.0787274	-0.083367
	SOX4/TOX2	-0.0306607	-0.00931922	-0.0914829	-0.0202473	-0.00804447	-0.0411746	0.00529019
	Tfh-1	0.0105462	-0.00720754	-0.111899	0.0458313	-0.10616	-0.0395072	0.00426671
	IEG	-0.00705231	-0.140203	0.0949144	0.031862	-0.188595	-0.000796221	-0.0591979
	CTLA4/CD38	-0.0685607	0.0181181	-0.0576957	-0.122418	-0.0393213	-0.0666705	-0.0388197
	Tfh-2	-0.0044268	-0.0247861	-0.164693	-0.000720015	-0.1172	-0.0615086	-0.0127478
	Treg	-0.0488996	-0.0123852	-0.104851	-0.0736827	-0.105671	-0.0732333	-0.0150415
	Th17-Resting	-0.0669335	-0.132163	-0.0516165	-0.0647447	-0.0574264	-0.0619487	-0.0184433
	Th22	-0.0744718	-0.12259	0.00145395	-0.0667015	-0.0523423	-0.122593	-0.0504576
	Th2-Resting	-0.0766343	-0.126474	-0.119772	-0.0178342	-0.0727917	-0.0976568	-0.0287444
	OX40/EBI3	-0.0481396	-0.103633	-0.0528278	-0.0922087	-0.115323	-0.102087	-0.101277
	CD8-Naive	-0.103015	-0.0952582	-0.0985781	0.00483856	-0.126609	-0.235884	0.0344173
	ICOS/CD38	-0.223705	0.0477832	-0.0980679	-0.186799	-0.0887133	-0.131045	-0.0348255
	Heatshock	-0.0567497	-0.0694139	-0.038347	-0.208454	-0.137219	-0.109129	-0.0970448
	CD40LG/TXNIP	-0.0813362	-0.128581	-0.188563	-0.0787023	-0.162137	-0.133821	-0.101729
	ISG	-0.100222	-0.12867	-0.0394995	-0.199762	-0.098574	-0.105641	-0.249966
	BCL2/FAM13A	-0.121556	-0.192926	-0.239088	-0.0424343	-0.18436	-0.127087	-0.0844562
	IEG3	-0.193458	-0.161459	-0.112952	0.0520991	-0.253598	-0.203485	-0.161841
	Cytoskeleton	-0.182314	-0.136724	-0.0269297	-0.163605	-0.148006	-0.176578	-0.206717
	NME1/FABP5	-0.181051	-0.0287557	-0.235582	-0.0710112	-0.15599	-0.255764	-0.146832
	CD172a/MERTK	-0.16924	-0.271687	-0.257973	-0.141621	0.0301964	-0.324532	0.0216283
	Translation	-0.217004	-0.212264	-0.343937	-0.0827599	-0.154478	-0.29149	0.0833473
	CD4-CM	-0.153706	-0.128601	-0.287053	-0.165103	-0.182449	-0.261715	-0.0828049
	CD4-Naive	-0.207912	-0.211893	-0.357756	-0.0541244	-0.290452	-0.314674	-0.0531097
RNA Detected
		AMP-RA	COMBAT	HIV-Vaccine	Pan-Cancer	Pan-Tissue	TBRU	UK-Covid
	Mito	-0.267075	-0.0500502	-0.15082	-0.155387	-0.253788	-0.500176	-0.174681
	CD172a/MERTK	-0.0526581	-0.20796	-0.654765	-0.26592	-0.111142	0.0219329	-0.0366249
	Doublet-Myeloid	-0.203744	-0.152194	-0.0656124	-0.0983577	-0.0944849	-0.0267927	-0.264945
	Translation	-0.0271525	-0.132602	-0.439936	-0.207315	-0.0405832	0.0668953	-0.0657796
	Doublet-Fibroblast	-0.318837	-0.0590737	-0.0280132	-0.122848	-0.102016	-0.0715854	-0.0769909
	Doublet-Plasmablast	-0.160856	-0.111102	0.0386922	-0.0461457	-0.154833	-0.0398342	-0.136621
	IEG	-0.0603998	-0.135719	-0.0940508	-0.1926	-0.0143904	-0.100674	0.137244
	Th1-Like	-0.0633051	-0.0774881	0.0456691	-0.190343	-0.116699	-0.0207262	-0.0151668
	CD4-Naive	-0.0146447	-0.167488	-0.117893	-0.0769666	-0.0383404	0.112553	-0.0636963
	CD40LG/TXNIP	-0.0264096	-0.10397	0.0601275	-0.140067	-0.102044	-0.0520372	0.00278257
	CD8-EM	-0.0946223	-0.0316702	0.0672538	-0.18889	-0.0323275	-0.0170277	-0.0151251
	Poor-Quality	-0.157875	-0.0479746	0.498897	0.0329463	-0.046111	-0.375098	-0.0670001
	Doublet-Bcell	-0.0518728	-0.046095	0.0603891	-0.0153918	-0.0517126	0.00493782	-0.0340906
	IEG2	0.0462881	-0.0921552	0.083552	-0.0535755	-0.0358019	-0.154791	0.0811314
	BCL2/FAM13A	0.0105546	-0.103779	0.0314173	-0.0112837	0.010113	0.0441191	-0.0589426
	Doublet-RBC	0.0014388	-0.00313857	-0.0191113	-0.0251542	-0.00148235	-0.00686122	0.0199778
	Multi-Cytokine	0.00394275	-0.0162807	0.113334	-0.087195	-0.012938	-0.0505314	0.0298982
	MAIT	0.00412069	0.00163974	0.0123468	-0.0808991	-0.00967025	0.0173239	0.0476331
	gdT	0.00160272	-0.0077954	0.0611918	-0.0835491	0.0410168	0.0110822	-0.0226392
	Doublet-Platelet	-0.0593417	-0.00560069	0.0725509	-0.0149396	-0.008457	0.0153898	0.0226919
	Cytotoxic	-0.0190842	-0.0193605	0.166498	-0.0523191	0.0351117	-0.0353715	-0.0257855
	CD8-Naive	0.0145017	-0.0822017	0.0338008	-0.043293	0.00850497	0.141126	-0.00938964
	Tfh-1	0.038541	0.016014	0.0313548	0.00637111	-0.0252863	0.0206025	-0.017702
	Treg	-0.00752717	0.0227282	-0.0189691	0.12366	-0.00172576	-0.035498	0.00393382
	IEG3	0.0463639	-0.10299	0.0206424	-0.0869652	0.0329506	0.0580655	0.151107
	SOX4/TOX2	-0.0134916	-0.00908514	0.0701441	0.0388178	0.0187303	0.0466764	0.00606983
	Tfh-2	0.0954219	0.00873426	0.0461183	0.107155	-0.0158478	0.019909	-0.00791426
	RGCC/MYADM	0.119677	0.00394513	0.0183856	-0.03492	-0.0281094	0.0469499	0.128353
	CD8-Trm	0.0357189	0.0375259	0.0608091	0.0129414	0.0939803	0.0395322	-0.0180177
	Th2-Resting	0.0441551	0.00440573	0.0860845	-0.0240015	0.012411	0.111576	0.034733
	Metallothionein	0.0222802	0.148123	0.0254213	0.0438635	-0.0128519	0.0380843	0.00505992
	Heatshock	0.00164769	0.0533214	0.093216	-0.0102606	0.01921	0.0887219	0.0480159
	Th22	0.096041	0.0526866	-0.0438142	0.0242925	0.020221	0.133059	0.0164517
	Th2-Activated	0.0321269	0.0379935	0.0447688	0.0687917	0.0175876	0.0932678	0.0467201
	ISG	0.0458431	0.0436271	0.108791	0.0738245	0.0452216	0.0560545	-0.0282874
	TEMRA	0.0151821	0.00656219	0.17601	0.0110965	0.133509	0.0120604	0.000646867
	IL10/IL19	0.0171508	0.123897	0.07092	0.0891125	0.0243164	0.0774487	0.0129513
	Th17-Resting	0.0534542	0.0325701	0.158283	0.0328429	0.0366752	0.0582317	0.0625278
	CD4-CM	0.0726735	0.110605	0.00740438	0.0270028	0.0638269	0.15925	0.107706
	HLA	0.086161	0.154107	-0.0102847	0.101025	0.0289389	0.176394	0.0311503
	Tph	0.18294	0.110786	0.150389	0.169979	0.0333132	0.018325	-0.0321183
	Th17-Activated	0.0811072	0.150291	0.125347	0.146469	0.05941	0.11324	0.0477951
	Exhaustion	0.102206	0.263302	0.20793	0.131116	0.101786	0.10694	0.0184634
	Cytoskeleton	0.16397	0.276768	-0.0828299	0.1458	0.11012	0.299908	0.0569505
	CTLA4/CD38	0.113404	0.260337	0.090489	0.190344	0.128515	0.190822	0.0712087
	OX40/EBI3	0.201352	0.1624	0.132305	0.272751	0.109383	0.154537	0.0406603
	TIMD4/TIM3	0.091918	0.350991	0.157867	0.114381	0.126887	0.19489	0.0611368
	CellCycle-G2M	0.196881	0.442885	0.0789562	0.294396	0.216931	0.239005	0.150429
	CellCycle-Late-S	0.219059	0.460631	0.0912042	0.346488	0.209644	0.215343	0.152371
	NME1/FABP5	0.280474	0.556092	0.0612904	0.364936	0.155177	0.434525	0.05168
	ICOS/CD38	0.254478	0.428977	0.127966	0.240192	0.242975	0.434982	0.236025
	CellCycle-S	0.267898	0.601597	0.163066	0.404501	0.262333	0.354919	0.174313
RNA Count
		AMP-RA	COMBAT	HIV-Vaccine	Pan-Cancer	Pan-Tissue	TBRU	UK-Covid
	Poor-Quality	-0.239227	-0.123518	0.365126	-0.0833464	-0.177928	-0.430297	-0.219307
	CD8-EM	-0.168612	-0.0967468	-0.0405089	-0.186691	-0.11931	-0.0994504	-0.111474
	Mito	-0.187241	-0.0222348	0.0409527	-0.100433	-0.142255	-0.357269	-0.044935
	Cytotoxic	-0.0724966	-0.103499	0.0324691	-0.0626505	-0.0404204	-0.147382	-0.165854
	Doublet-Fibroblast	-0.275422	-0.0458497	0.00508768	-0.0787908	-0.0554897	-0.0379717	-0.0381374
	Doublet-Myeloid	-0.175275	-0.126088	0.174875	-0.0741033	-0.0607971	-0.0155644	-0.220576
	Doublet-Plasmablast	-0.150842	-0.0803805	0.0498515	-0.0611973	-0.124673	-0.0294966	-0.0974402
	Th1-Like	-0.05661	-0.0979718	-0.0262315	-0.14768	-0.107711	-3.52478e-05	-0.023001
	gdT	-0.0334389	-0.0607634	-0.00731105	-0.0787223	-0.0477259	-0.046541	-0.0907105
	Multi-Cytokine	-0.0276291	-0.064654	0.0749041	-0.0656071	-0.0806492	-0.109631	-0.0370381
	TEMRA	-0.0540302	-0.0582535	0.0736823	-0.0282667	-0.0210666	-0.0618002	-0.0993448
	Treg	-0.027595	-0.0254138	-0.0642974	0.0332869	-0.0461393	-0.0829857	-0.0296841
	CD172a/MERTK	0.0864534	-0.0940841	-0.527085	-0.128884	0.0880514	0.177648	0.166471
	CD8-Trm	-0.0365058	-0.00172128	-0.0361656	-0.0282481	-0.0511314	-0.00515593	-0.0560265
	CD40LG/TXNIP	0.01008	-0.103338	0.0677543	-0.104691	-0.0466824	-0.0108008	0.0116938
	MAIT	0.0108287	-0.0184017	-0.0405963	-0.0549818	-0.0372965	0.021037	0.0329693
	IEG	0.00154628	-0.0921749	-0.0317339	-0.11853	-0.0112071	-0.0403241	0.208812
	Doublet-Bcell	-0.0363605	-0.0394653	0.0882697	-0.00792285	-0.0426775	0.00800711	-0.0160494
	Tph	0.080358	0.0575997	0.0177911	0.0458036	-0.0711456	-0.0504032	-0.125679
	ISG	0.0257044	-0.0316892	0.0746274	0.0296151	-0.000834008	0.0245697	-0.15624
	Doublet-RBC	0.0151516	-0.00411285	-0.00150683	-0.0141883	0.00698094	-0.0170906	0.0328599
	IEG2	0.0879548	-0.0846497	0.17706	-0.052602	-0.0659463	-0.131648	0.0882454
	Tfh-1	0.0163727	0.0216869	0.0135156	-0.00696648	-0.0304872	0.0135809	0.00366825
	Doublet-Platelet	-0.052925	-0.00399713	0.0886728	-0.00719492	-0.00901412	0.0170998	0.0338028
	HLA	0.00037465	0.0910916	-0.0479947	0.0601176	-0.0141668	0.0720975	-0.0665726
	Exhaustion	-0.0161575	0.199885	0.053109	0.024963	-0.0396731	-0.00283467	-0.122847
	Heatshock	-0.000791673	0.0638887	0.014092	0.00803307	-0.0352175	0.0532766	0.031069
	RGCC/MYADM	0.102441	-0.000757841	-0.0427944	-0.01962	-0.0654438	0.0611707	0.106418
	IL10/IL19	-0.0241476	0.0916793	-0.00360408	0.0508259	0.00287915	0.0342484	0.00328233
	Tfh-2	0.0647193	0.0189908	0.0319237	0.0591195	-0.0256535	0.0145771	0.014705
	SOX4/TOX2	-0.00126699	-0.000343265	0.0970693	0.0243044	0.0104232	0.0245807	0.035323
	Th22	0.0737497	0.020004	-0.138241	0.051194	0.0619216	0.130384	0.0114643
	Metallothionein	0.0186375	0.161179	-0.0484687	0.0664629	0.0161336	0.0247555	0.0137631
	BCL2/FAM13A	0.102389	-0.0606835	0.0451877	0.018575	0.0918305	0.0910278	-0.00259584
	Th2-Activated	0.0368904	0.0308309	0.0278705	0.0501251	0.0127269	0.0930728	0.0571148
	TIMD4/TIM3	-0.0107414	0.283694	0.00186378	0.0624415	0.042515	0.0968162	-0.0265607
	Th17-Activated	0.0536593	0.128564	0.0514036	0.111739	0.0380631	0.0819053	0.0275014
	IEG3	0.138585	-0.0567512	0.0907249	-0.0466396	0.0524013	0.102994	0.215207
	Th2-Resting	0.11438	0.00413674	0.0505849	0.0138058	0.0865058	0.16051	0.0761471
	CD4-Naive	0.128065	-0.0679255	0.0525352	0.0212174	0.106051	0.194307	0.0940958
	CD4-CM	0.0874754	0.0894195	-0.0650898	0.0374678	0.140641	0.161059	0.149713
	CTLA4/CD38	0.0599514	0.214278	-0.0473311	0.129666	0.115009	0.126851	0.0237741
	CD8-Naive	0.117726	-0.0135671	0.101924	0.0200174	0.111272	0.203999	0.115221
	Th17-Resting	0.129931	0.0351524	0.124706	0.0643528	0.0966639	0.129136	0.114299
	Translation	0.167586	0.0389214	-0.192468	-0.0240836	0.223407	0.299041	0.19388
	OX40/EBI3	0.139683	0.160681	0.0281115	0.194963	0.0780852	0.138668	0.00998117
	Cytoskeleton	0.105267	0.266443	-0.19094	0.153172	0.140695	0.268775	0.0166841
	ICOS/CD38	0.19336	0.366875	-0.0391067	0.2162	0.254586	0.349282	0.222059
	CellCycle-G2M	0.180324	0.469247	0.0278094	0.294279	0.264766	0.199213	0.141399
	CellCycle-Late-S	0.189917	0.47993	0.047181	0.325086	0.233075	0.194466	0.137205
	CellCycle-S	0.227579	0.623051	0.0695563	0.384415	0.280428	0.314365	0.13855
	NME1/FABP5	0.346467	0.682673	0.001459	0.456284	0.291234	0.465138	0.104318
PC Fraction
		AMP-RA	COMBAT	HIV-Vaccine	Pan-Cancer	Pan-Tissue	TBRU	UK-Covid
	Poor-Quality	-0.621202	-0.352275	-0.477311	-0.332534	-0.501169	-0.545438	-0.570265
	Mito	-0.304234	-0.114815	-0.038439	-0.0207417	-0.294098	-0.504258	-0.156429
	Doublet-Fibroblast	-0.192266	-0.0210608	-0.0185577	-0.335933	-0.191073	-0.0429272	-0.0461425
	Doublet-Myeloid	-0.15238	-0.190586	-0.200161	-0.108785	-0.0943265	-0.0118393	-0.0728622
	Doublet-Plasmablast	-0.230125	-0.0704069	-0.10545	-0.0356626	-0.1247	-0.0489444	-0.129025
	Treg	-0.160279	-0.112615	-0.0517181	-0.063919	-0.0276246	-0.188917	-0.109223
	CD8-EM	-0.041515	-0.0979447	-0.160825	-0.114212	-0.0698689	0.0176872	-0.0388254
	Cytotoxic	0.00960142	-0.110157	-0.282946	0.06273	-0.0477858	0.00589162	-0.0673638
	Multi-Cytokine	-0.000184	-0.0833973	-0.137489	0.00532511	-0.0849984	-0.0287166	-0.0336715
	Tph	0.0439411	-0.0930895	-0.118455	0.0505344	-0.0395815	-0.0922185	-0.0855406
	TEMRA	-0.00236737	-0.0769348	-0.177592	0.00259305	0.0527621	0.0282253	-0.0268872
	Doublet-Bcell	-0.0686333	-0.0387934	-0.0306766	-0.0261458	-0.0123859	0.0075996	-0.0262889
	IL10/IL19	-0.0450118	-0.0384897	-0.0402013	-0.0126441	0.00385979	-0.00494155	-0.0275302
	Doublet-Platelet	-0.034592	-0.0115598	-0.028867	-0.0565215	0.0220143	0.0164854	-0.00952934
	CD40LG/TXNIP	0.018243	0.00662832	-0.0213314	0.0133439	-0.0222527	-0.00927025	-0.0550078
	ISG	-0.0149281	-0.0239081	-0.00929759	0.0203855	0.0774859	0.00129329	-0.110558
	SOX4/TOX2	-0.0140127	0.00515026	-0.019211	-0.0515573	0.00299084	0.0221458	-0.000207096
	gdT	0.0664578	-0.0601017	-0.090767	-0.00508167	-0.0157689	0.0609818	0.0231984
	Th1-Like	0.0607201	-0.0183691	0.0252694	-0.0383983	-0.133102	0.0632984	0.0280121
	Doublet-RBC	0.0170459	-0.00977343	0.0227328	-0.0537102	0.0299437	0.00331914	-0.00304816
	IEG	-0.0485658	0.0684276	0.0364648	-0.153971	0.0613233	-0.0255961	0.0791891
	Exhaustion	0.0368969	-0.0545614	-0.149938	0.0611833	0.116651	0.0150159	0.0019537
	Tfh-1	-0.0285309	0.00972956	-0.00972699	0.0327392	0.0776661	-0.0214498	-0.0282292
	Tfh-2	0.012231	0.00590384	-0.016739	0.022025	0.0595906	-0.00998634	-0.0340666
	CTLA4/CD38	0.0325793	-0.0411894	-0.00397621	0.0395	0.0125173	0.00402105	0.00968073
	HLA	0.0905759	-0.0686955	-0.136881	0.0668277	0.0581082	0.0297653	0.0407342
	Heatshock	-0.0479181	0.0280812	-0.0277311	0.0524048	-0.00142047	0.0818615	0.0346183
	CD8-Trm	0.0670046	-0.0247269	-0.0836635	0.127388	-0.0346731	0.0637972	0.0369403
	Th17-Activated	0.052095	-0.0111445	0.0640068	0.0497806	0.0118752	0.00591448	0.0250547
	CellCycle-Late-S	0.0582523	0.0349076	0.0314295	-0.000485868	0.0126785	0.0497251	0.0491134
	MAIT	0.0774054	0.00394956	0.138413	-0.104924	0.0448114	0.0384698	0.0521964
	CellCycle-G2M	0.0599202	0.0270694	0.0407977	0.00473683	0.0211724	0.0603253	0.0495447
	IEG2	0.131535	-0.0210549	0.0249661	0.153989	0.0105231	-0.0321369	0.0119501
	Metallothionein	0.0462043	0.0454411	0.0337146	0.0404017	0.0157577	0.0800624	0.021443
	Th2-Activated	0.0550631	0.0135593	0.0686639	0.0236649	-0.00218149	0.0642211	0.0601895
	CD4-CM	0.0959662	0.0494696	0.0233998	-0.0166668	0.0738838	0.140361	0.0854118
	TIMD4/TIM3	0.129785	-0.0137152	-0.028661	0.120477	0.0668636	0.0893573	0.0960543
	RGCC/MYADM	0.133258	-0.0012842	0.0110685	0.150359	0.0134376	0.0624545	0.103946
	BCL2/FAM13A	0.115073	0.133226	0.0947807	0.0378084	0.0501722	0.0825585	-0.0282975
	CD172a/MERTK	0.212899	0.193444	0.0631991	-0.290414	-0.0530455	0.264777	0.143767
	CellCycle-S	0.123304	0.0531936	0.0685369	0.0504976	0.0529889	0.114554	0.0780932
	Th22	0.128133	0.0176301	0.0600661	0.134883	0.12221	0.0887551	0.145864
	OX40/EBI3	0.104821	0.0532074	0.0903501	0.063425	0.147836	0.118929	0.122314
	IEG3	0.178012	0.0845824	0.0779807	0.11158	0.0445446	0.158432	0.127821
	Th17-Resting	0.165553	0.0564327	0.215195	0.118354	0.063353	0.0780747	0.106378
	CD4-Naive	0.174824	0.176796	0.000884487	0.0526137	0.161343	0.227453	0.0222791
	Th2-Resting	0.167377	0.0842676	0.164421	0.038179	0.0972677	0.145452	0.14512
	CD8-Naive	0.164793	0.137885	0.0393824	0.0606477	0.171691	0.233062	0.0626165
	ICOS/CD38	0.284452	0.0240978	0.135532	0.0886745	0.159921	0.192866	0.194139
	Cytoskeleton	0.243041	0.096224	0.0738987	0.144356	0.279074	0.251649	0.229652
	Translation	0.292257	0.253832	0.349684	-0.0411608	0.145331	0.329008	0.223069
	NME1/FABP5	0.293391	0.122249	0.25171	0.137071	0.24821	0.354922	0.238881

## Sheet: S5 - AIM Association
Table S5. AIM-Seq association. Regression coefficients and P-values for the association between cGEP usage and binary variables reflecting CEFX vs. mock stimulation or AIM-positive vs. AIM-negative or Mock. Coef. represents the regression coefficient, P represents the P-value, and Q represents the FDR-corrected P-value.
	cGEP	CEFX Coef.	CEFX P	CEFX Q	AIM+ Coef.	AIM+ P	AIM+ Q	Activation Type	cGEP Class
	CellCycle-G2M	0.000282914	0.0208469	0.180673	0.00169835	1.9088e-09	8.74173e-08	AIM functional	Functional
	Translation	0.00476274	0.630648	0.918643	-0.0157088	0.129626	0.182177	Other	Functional
	HLA	0.00152799	0.208754	0.516914	0.00338374	0.0123315	0.0221117	AIM functional	Functional
	ISG	0.0235129	8.92058e-07	4.6387e-05	0.0165533	3.09121e-05	0.000123649	Millieu	Functional
	Mito	-0.00135018	0.879277	0.95255	0.00393571	0.659137	0.699492	Other	Artifact
	Doublet-RBC	0.000273398	0.602849	0.918643	-0.000928924	0.0944832	0.144504	Other	Doublet Lineage
	gdT	0.00111367	0.77082	0.945466	-0.00358008	0.357024	0.44203	Other	Lineage
	CellCycle-S	0.00108151	0.381836	0.827312	0.011678	4.44003e-07	3.29831e-06	AIM functional	Functional
	Cytotoxic	-0.00765709	0.760423	0.945466	-0.0221987	0.383575	0.463858	Other	Functional
	Doublet-Platelet	4.04032e-05	0.902132	0.957364	-0.000555779	0.109669	0.15921	Other	Doublet Lineage
	NME1/FABP5	0.00266735	0.635983	0.918643	0.0466514	2.02696e-06	1.05402e-05	AIM functional	Functional
	Th22	-0.00248174	0.202431	0.516914	0.00959905	0.000216339	0.00062498	AIM functional	Functional
	MAIT	-0.00241144	0.776968	0.945466	-0.00341808	0.688548	0.71609	Other	Lineage
	CellCycle-Late-S	0.00039785	0.0644597	0.278302	0.000959067	0.000361229	0.000939196	AIM functional	Functional
	Cytoskeleton	0.00119251	0.434187	0.840854	0.0182824	3.33837e-08	4.33988e-07	AIM functional	Functional
	Heatshock	0.00147433	0.122611	0.375044	0.00948446	1.74274e-07	1.81245e-06	AIM functional	Functional
	Multi-Cytokine	0.000566605	0.691324	0.945466	0.00849114	5.36746e-05	0.000199363	AIM functional	Functional
	TEMRA	0.0012114	0.837032	0.95255	9.75091e-05	0.986778	0.986778	Other	Lineage
	Doublet-Myeloid	4.32925e-06	0.995549	0.995549	5.30143e-05	0.945548	0.964088	Other	Doublet Lineage
	Metallothionein	0.000899462	0.001534	0.039884	0.00335138	3.36221e-09	8.74173e-08	Millieu	Functional
	CD4-CM	-0.00324416	0.0777092	0.288634	-0.00226239	0.203408	0.264431	Other	Lineage
	IEG	0.00358982	0.0196923	0.180673	0.000768424	0.575468	0.623424	Other	Artifact
	CD8-EM	0.00191175	0.871316	0.95255	-0.019924	0.110222	0.15921	Other	Lineage
	IEG2	0.00423885	0.167552	0.484039	-0.0042071	0.170509	0.227345	Other	Artifact
	CD4-Naive	-0.0245396	0.0305439	0.202556	-0.0675134	2.06494e-05	9.76154e-05	AIM lineage	Lineage
	Treg	0.00131148	0.607375	0.918643	0.0116025	0.000543474	0.00122872	AIM lineage	Lineage
	Th17-Resting	-0.00296507	0.0311624	0.202556	0.0122446	3.30015e-07	2.86013e-06	AIM lineage	Lineage
	Poor-Quality	0.00396507	0.482628	0.896309	-0.00799019	0.169961	0.227345	Other	Artifact
	CD8-Naive	-0.00729134	0.256809	0.607003	-0.056835	7.97062e-07	5.1809e-06	AIM lineage	Lineage
	RGCC/MYADM	-0.00186499	0.0695756	0.278302	0.00541988	8.60474e-05	0.000279654	AIM functional	Functional
	TIMD4/TIM3	0.00140855	0.118387	0.375044	0.00394763	0.000502114	0.00118681	AIM functional	Functional
	Doublet-Plasmablast	0.00473873	0.0529856	0.275525	-0.00292781	0.209485	0.265689	Other	Doublet Lineage
	BCL2/FAM13A	-0.000288093	0.949249	0.967861	0.0155698	0.00428154	0.00824592	AIM functional	Functional
	IL10/IL19	-0.00239344	0.0117896	0.180673	-0.000502505	0.545132	0.616236	Other	Functional
	Th2-Activated	5.02824e-05	0.928844	0.965998	0.00254981	0.000585778	0.00126919	AIM lineage	Lineage
	Th2-Resting	-0.00374626	0.0638155	0.278302	0.00109699	0.561078	0.620767	Other	Lineage
	ICOS/CD38	0.00272368	0.015572	0.180673	0.00843002	1.54684e-06	8.93727e-06	AIM functional	Functional
	Doublet-Bcell	0.000378128	0.379385	0.827312	0.000849613	0.062796	0.105335	Other	Doublet Lineage
	Th1-Like	-0.00673756	0.0450451	0.260261	-0.0177002	7.52039e-05	0.000260707	AIM lineage	Lineage
	CTLA4/CD38	-0.000160039	0.80001	0.945466	0.00855619	9.6569e-09	1.67386e-07	AIM functional	Functional
	CD8-Trm	-0.000635527	0.789587	0.945466	-0.00464423	0.0693693	0.112725	Other	Lineage
	Th17-Activated	-0.000806319	0.406984	0.840854	0.00364983	0.00214896	0.00429791	AIM lineage	Lineage
	Tfh-2	0.000834823	0.580558	0.918643	0.00486393	0.00623713	0.0115832	AIM lineage	Lineage
	OX40/EBI3	0.00195485	0.656732	0.922975	0.0282236	2.61464e-05	0.000113301	AIM functional	Functional
	CD172a/MERTK	-0.00262197	0.603109	0.918643	-0.0104735	0.0542654	0.0940599	Other	Functional
	IEG3	0.00171414	0.186065	0.509232	-0.000809401	0.520291	0.601226	Other	Functional
	Doublet-Fibroblast	0.000130975	0.867076	0.95255	-0.0037226	0.000391469	0.000969351	Other	Doublet Lineage
	SOX4/TOX2	-0.000333788	0.779457	0.945466	-0.00214997	0.0898886	0.141643	Other	Functional
	CD40LG/TXNIP	-0.00213742	0.436597	0.840854	-0.0133291	0.000299768	0.000820417	Other	Functional
	Tph	0.0012813	0.606533	0.918643	0.00953761	0.00197414	0.00410621	AIM lineage	Lineage
	Exhaustion	0.0032869	0.115375	0.375044	0.0111167	9.2955e-05	0.000284333	AIM functional	Functional
	Tfh-1	-0.000862605	0.564871	0.918643	-0.00126368	0.402852	0.476098	Other	Lineage

## Sheet: S6 - Proliferation Association
Table S6. Association with proliferation. T-statistics, P-values, and log2 odds ratios for the paired T-test of proliferating and non-proliferating T cells in each dataset (tabs). For the meta-analysis across datasets it provides the Fisher’s method combined P-value and the average log2 odds ratio.
Meta-analysis
	GEP	P	Mean_Log2_Ratio
	NME1/FABP5	5.8715e-131	1.96586
	TIMD4/TIM3	3.00999e-87	1.46103
	HLA	2.25145e-90	1.08605
	Exhaustion	1.86134e-99	0.979573
	Cytoskeleton	1.84994e-98	0.921861
	ICOS/CD38	2.37553e-99	0.886987
	CTLA4/CD38	2.94372e-55	0.777809
	OX40/EBI3	6.08687e-83	0.73184
	Th17-Activated	8.09974e-34	0.705417
	Metallothionein	4.03648e-51	0.635684
	IL10/IL19	4.61412e-54	0.54147
	Tph	3.66838e-53	0.465538
	TEMRA	0.000235094	-0.0463964
	Doublet-Platelet	2.21238e-08	-0.248313
	Multi-Cytokine	2.94753e-10	-0.330966
	Tfh-1	3.79629e-13	-0.340243
	Tfh-2	2.27751e-17	-0.393886
	Th2-Activated	1.46654e-22	-0.425735
	ISG	7.57962e-18	-0.449936
	SOX4/TOX2	2.29489e-22	-0.451068
	Doublet-RBC	1.16446e-12	-0.489016
	CD8-Trm	2.84663e-15	-0.510313
	Poor-Quality	2.07125e-39	-0.5172
	Th22	1.50704e-08	-0.521579
	Cytotoxic	2.52602e-23	-0.667769
	Doublet-Bcell	1.58128e-61	-0.688429
	Heatshock	2.47234e-29	-0.688627
	RGCC/MYADM	2.33773e-39	-0.761596
	gdT	1.15424e-50	-0.771381
	Treg	1.66837e-24	-0.817865
	Mito	7.20338e-63	-0.989376
	CD8-EM	9.68256e-59	-1.11466
	Doublet-Plasmablast	9.97398e-101	-1.13341
	Doublet-Fibroblast	2.40611e-83	-1.13771
	CD4-CM	1.00524e-88	-1.28924
	Doublet-Myeloid	7.75348e-68	-1.70594
	MAIT	4.00846e-79	-1.78534
	Th1-Like	1.75234e-142	-2.12215
	Th2-Resting	9.71474e-137	-2.29585
	CD8-Naive	3.68325e-133	-2.338
	BCL2/FAM13A	5.14713e-115	-2.38261
	Th17-Resting	1.65503e-132	-2.38327
	IEG3	1.13806e-99	-2.43788
	IEG2	1.92959e-82	-2.65142
	IEG	1.6948e-87	-2.90024
	CD40LG/TXNIP	2.40378e-150	-3.20557
	CD172a/MERTK	2.42421e-138	-3.36225
	CD4-Naive	8.92275e-138	-3.87341
	Translation	3.96108e-95	-4.70592
AMP-RA
	GEP	T	logRatio	P
	CellCycle-G2M	16.3793	5.51463	4.47051e-19
	Translation	-10.6187	-4.83391	4.54908e-13
	HLA	11.9046	1.39619	1.4714e-14
	ISG	-6.07611	-0.662985	4.05981e-07
	Mito	-11.7738	-1.37645	2.06554e-14
	Doublet-RBC	-6.54803	-0.408656	8.99597e-08
	gdT	-12.251	-0.929442	6.05221e-15
	CellCycle-S	37.9944	4.94958	1.99564e-32
	Cytotoxic	-3.81849	-0.864137	0.00046927
	Doublet-Platelet	1.43256	0.0620155	0.15995
	NME1/FABP5	7.21166	1.71206	1.09952e-08
	Th22	-2.49404	-0.539085	0.0169773
	MAIT	-11.0225	-1.6907	1.51358e-13
	CellCycle-Late-S	21.6006	5.87732	2.64187e-23
	Cytoskeleton	4.00001	0.449789	0.000273849
	Heatshock	-4.84532	-0.869811	2.038e-05
	Multi-Cytokine	0.730197	-0.123975	0.469634
	TEMRA	0.784548	-0.0437084	0.437459
	Doublet-Myeloid	-7.33614	-1.49065	7.43772e-09
	Metallothionein	4.13545	0.440371	0.000182263
	CD4-CM	-13.7992	-1.72131	1.36603e-16
	IEG	-10.9831	-2.25447	1.68351e-13
	CD8-EM	-5.63862	-0.804499	1.64472e-06
	IEG2	-10.8177	-2.38567	2.6379e-13
	CD4-Naive	-9.14493	-3.6476	3.02045e-11
	Treg	-5.47835	-0.994109	2.74332e-06
	Th17-Resting	-12.6284	-2.16082	2.33885e-15
	Poor-Quality	-2.72125	-0.199018	0.00966802
	CD8-Naive	-11.3342	-1.79975	6.56671e-14
	RGCC/MYADM	-2.13803	-0.497353	0.0388368
	TIMD4/TIM3	4.93367	0.463583	1.54368e-05
	Doublet-Plasmablast	-7.20494	-0.828822	1.123e-08
	BCL2/FAM13A	-10.0058	-1.7763	2.51743e-12
	IL10/IL19	2.66999	0.271706	0.0110021
	Th2-Activated	-8.31103	-0.638232	3.65832e-10
	Th2-Resting	-14.7416	-1.96267	1.55687e-17
	ICOS/CD38	0.707247	-0.0159596	0.483618
	Doublet-Bcell	1.39259	-0.0665054	0.171633
	Th1-Like	-12.7524	-1.96863	1.71792e-15
	CTLA4/CD38	0.372759	-0.0375232	0.711346
	CD8-Trm	-3.11481	-0.381623	0.00344401
	Th17-Activated	2.74145	0.295047	0.00918478
	Tfh-2	-4.28831	-0.650967	0.000114566
	OX40/EBI3	4.90277	0.760771	1.70136e-05
	CD172a/MERTK	-13.4678	-2.7462	3.0025e-16
	IEG3	-9.10573	-2.71785	3.38979e-11
	Doublet-Fibroblast	-7.11686	-1.20357	1.48198e-08
	SOX4/TOX2	-3.71861	-0.39739	0.000628765
	CD40LG/TXNIP	-10.3834	-2.85288	8.72376e-13
	Tph	4.3257	0.474133	0.000102193
	Exhaustion	6.6007	0.742783	7.60697e-08
	Tfh-1	-4.09204	-0.673573	0.000207763
COMBAT
	GEP	T	logRatio	P
	CellCycle-G2M	42.1517	6.19802	8.81879e-74
	Translation	-18.769	-4.50207	1.67155e-37
	HLA	15.7675	1.66689	5.03374e-31
	ISG	-4.18524	-0.227418	5.4557e-05
	Mito	0.119244	-0.023006	0.905282
	Doublet-RBC	0.486472	-0.166282	0.62752
	gdT	-6.44567	-0.526523	2.50946e-09
	CellCycle-S	109.281	6.18457	5.35249e-122
	Cytotoxic	-6.17586	-0.60923	9.28697e-09
	Doublet-Platelet	0.457641	-0.144111	0.648038
	NME1/FABP5	29.9553	3.81683	1.55479e-57
	Th22	-5.17607	-0.487523	9.2228e-07
	MAIT	-13.1106	-1.48176	6.48586e-25
	CellCycle-Late-S	49.381	6.1554	1.39184e-81
	Cytoskeleton	21.4124	1.61592	8.39805e-43
	Heatshock	8.0425	0.519962	7.05227e-13
	Multi-Cytokine	-4.29972	-0.312867	3.50168e-05
	TEMRA	1.52556	0.07093	0.129752
	Doublet-Myeloid	-10.9987	-1.76969	6.92836e-20
	Metallothionein	16.8126	1.43579	2.46077e-33
	CD4-CM	-7.40134	-0.515255	2.02901e-11
	IEG	-11.9319	-3.14926	4.04723e-22
	CD8-EM	-8.17322	-0.725051	3.52061e-13
	IEG2	-12.2863	-1.93601	5.79243e-23
	CD4-Naive	-26.7956	-3.73499	1.78058e-52
	Treg	-1.23864	-0.332542	0.217895
	Th17-Resting	-19.8231	-2.13303	1.1597e-39
	Poor-Quality	5.09786	0.231781	1.29688e-06
	CD8-Naive	-22.6858	-2.25874	3.20035e-45
	RGCC/MYADM	2.02181	0.149403	0.0454204
	TIMD4/TIM3	19.9674	2.70521	5.9375e-40
	Doublet-Plasmablast	-21.6438	-1.02273	3.00725e-43
	BCL2/FAM13A	-20.1366	-2.79494	2.71693e-40
	IL10/IL19	14.1574	1.44366	2.33327e-27
	Th2-Activated	4.81244	0.258412	4.38343e-06
	Th2-Resting	-22.6653	-2.04667	3.49527e-45
	ICOS/CD38	26.4152	2.0649	7.7376e-52
	Doublet-Bcell	-17.6802	-0.960851	3.28758e-35
	Th1-Like	-23.7243	-1.86125	3.92847e-47
	CTLA4/CD38	16.1757	2.20834	6.20279e-32
	CD8-Trm	0.11531	-0.0295377	0.908392
	Th17-Activated	8.98088	1.83208	4.54902e-15
	Tfh-2	2.83262	0.144064	0.00541683
	OX40/EBI3	25.3078	1.50003	6.07474e-50
	CD172a/MERTK	-28.9034	-3.99734	6.75517e-56
	IEG3	-14.6144	-1.44414	2.06582e-28
	Doublet-Fibroblast	-16.4589	-1.09438	1.46821e-32
	SOX4/TOX2	-4.80958	-0.196513	4.43628e-06
	CD40LG/TXNIP	-27.3314	-3.33157	2.30581e-53
	Tph	15.0653	1.10648	1.9306e-29
	Exhaustion	23.7323	1.87075	3.80059e-47
	Tfh-1	4.11728	0.152716	7.0721e-05
HIV-Vaccine
	GEP	T	logRatio	P
	CellCycle-G2M	6.36783	5.81355	8.16244e-05
	Translation	-10.6205	-5.45363	9.13e-07
	HLA	1.48501	0.191589	0.168366
	ISG	-1.30564	-0.332641	0.220913
	Mito	-6.91046	-1.62381	4.14132e-05
	Doublet-RBC	-4.38045	-0.929584	0.00137643
	gdT	-2.73476	-1.35293	0.021021
	CellCycle-S	13.7733	5.335	7.91446e-08
	Cytotoxic	0.0433027	-0.754367	0.966313
	Doublet-Platelet	-4.03704	-1.32654	0.00237251
	NME1/FABP5	3.13801	0.753724	0.0105458
	Th22	-2.4521	-0.825997	0.034135
	MAIT	-4.47311	-2.5343	0.00119167
	CellCycle-Late-S	9.34596	5.43499	2.94416e-06
	Cytoskeleton	2.3293	0.471164	0.0421002
	Heatshock	-2.83824	-0.559913	0.0176015
	Multi-Cytokine	-1.42853	-0.567341	0.18362
	TEMRA	0.817106	-0.674722	0.432904
	Doublet-Myeloid	-3.04636	-2.53306	0.0123281
	Metallothionein	3.4055	1.12543	0.00670878
	CD4-CM	-3.79408	-1.61304	0.00351975
	IEG	-9.62321	-3.73108	2.25768e-06
	CD8-EM	-7.09013	-1.60536	3.33446e-05
	IEG2	-3.71694	-3.53039	0.00399536
	CD4-Naive	-25.1078	-4.89451	2.29979e-10
	Treg	-1.21642	-1.2336	0.251756
	Th17-Resting	-6.57821	-3.32041	6.24694e-05
	Poor-Quality	-5.25794	-1.45093	0.000369151
	CD8-Naive	-16.2078	-3.78384	1.6576e-08
	RGCC/MYADM	-4.52249	-1.36027	0.0011041
	TIMD4/TIM3	3.90716	1.80622	0.00292674
	Doublet-Plasmablast	-13.6196	-2.1232	8.8087e-08
	BCL2/FAM13A	-9.34847	-3.19457	2.93701e-06
	IL10/IL19	0.92526	-0.0317072	0.376619
	Th2-Activated	-1.32111	-0.720282	0.215894
	Th2-Resting	-21.9738	-2.86147	8.53561e-10
	ICOS/CD38	2.65433	0.848455	0.024133
	Doublet-Bcell	-8.90883	-1.48784	4.53432e-06
	Th1-Like	-8.94859	-2.27494	4.35664e-06
	CTLA4/CD38	2.10807	0.435086	0.0612407
	CD8-Trm	-2.02679	-0.879599	0.07018
	Th17-Activated	0.763639	0.0375429	0.462719
	Tfh-2	-2.3962	-0.800241	0.0375588
	OX40/EBI3	3.08906	0.396565	0.0114623
	CD172a/MERTK	-8.55107	-4.46144	6.53954e-06
	IEG3	-8.83657	-2.82648	4.8778e-06
	Doublet-Fibroblast	-4.20776	-1.52097	0.00180632
	SOX4/TOX2	-10.5838	-1.6661	9.42694e-07
	CD40LG/TXNIP	-11.9729	-3.44815	2.98428e-07
	Tph	2.88714	0.410346	0.0161863
	Exhaustion	5.47275	1.13379	0.000272002
	Tfh-1	-0.05752	-0.558068	0.955264
Pan-Cancer
	GEP	T	logRatio	P
	CellCycle-G2M	22.6819	5.38777	1.42788e-35
	Translation	-9.41579	-2.34428	2.1416e-14
	HLA	11.0371	0.904359	1.88326e-17
	ISG	-1.55203	-0.222716	0.124809
	Mito	-10.23	-1.25571	6.10357e-16
	Doublet-RBC	-0.967251	-0.0036828	0.336486
	gdT	-12.7345	-0.92409	1.55016e-20
	CellCycle-S	48.0913	5.03715	1.16744e-58
	Cytotoxic	-6.62979	-1.12876	4.33807e-09
	Doublet-Platelet	3.9239	0.605136	0.000189757
	NME1/FABP5	13.6405	2.26816	4.01451e-22
	Th22	-2.37137	-0.394919	0.0202557
	MAIT	-9.12938	-1.49238	7.54887e-14
	CellCycle-Late-S	40.8952	5.8869	1.65927e-53
	Cytoskeleton	11.4995	1.16285	2.63702e-18
	Heatshock	-3.72575	-0.633938	0.000372163
	Multi-Cytokine	0.89586	0.0277465	0.373157
	TEMRA	-1.34965	-0.363348	0.181135
	Doublet-Myeloid	-2.52687	-0.903422	0.0135869
	Metallothionein	2.30009	0.39064	0.0241888
	CD4-CM	-6.70486	-0.559842	3.14233e-09
	IEG	-9.08342	-1.23365	9.24297e-14
	CD8-EM	-13.0904	-1.23993	3.64714e-21
	IEG2	-13.0146	-1.85481	4.95624e-21
	CD4-Naive	-8.4931	-1.81338	1.24986e-12
	Treg	-6.54068	-0.667086	6.35423e-09
	Th17-Resting	-13.4357	-1.40082	9.0887e-22
	Poor-Quality	-2.56315	-0.176838	0.0123487
	CD8-Naive	-5.97215	-0.521823	7.02449e-08
	RGCC/MYADM	-6.42728	-0.735442	1.03092e-08
	TIMD4/TIM3	6.0525	0.372027	5.02088e-08
	Doublet-Plasmablast	-4.09346	-0.258462	0.000104986
	BCL2/FAM13A	-10.0254	-0.711963	1.48638e-15
	IL10/IL19	6.14338	0.674963	3.42868e-08
	Th2-Activated	-0.643812	-0.0526232	0.521635
	Th2-Resting	-13.9088	-0.987384	1.38793e-22
	ICOS/CD38	7.44901	0.575579	1.23993e-10
	Doublet-Bcell	-0.611838	-0.0915527	0.542471
	Th1-Like	-17.0506	-1.53282	1.08432e-27
	CTLA4/CD38	2.11249	0.17219	0.0379289
	CD8-Trm	-6.30546	-0.587247	1.72962e-08
	Th17-Activated	4.8741	0.399332	5.84063e-06
	Tfh-2	-0.0523357	0.0465226	0.958399
	OX40/EBI3	6.53823	0.771727	6.42105e-09
	CD172a/MERTK	-8.21459	-1.46379	4.27316e-12
	IEG3	-13.4781	-1.46591	7.67151e-22
	Doublet-Fibroblast	-1.46737	-0.440976	0.1464
	SOX4/TOX2	3.75537	0.292753	0.00033695
	CD40LG/TXNIP	-14.5049	-2.00875	1.35377e-23
	Tph	0.349826	0.0257649	0.727437
	Exhaustion	7.02271	0.438986	7.95709e-10
	Tfh-1	-0.908537	-0.0615035	0.366467
Pan-Tissue
	GEP	T	logRatio	P
	CellCycle-G2M	7.40101	5.10602	5.21931e-07
	Translation	-3.87211	-4.77531	0.00102613
	HLA	3.69579	0.789034	0.00153441
	ISG	-1.00775	-0.435748	0.326238
	Mito	-0.999295	-0.814897	0.330209
	Doublet-RBC	-2.7098	-0.543695	0.0138922
	gdT	-0.210666	-0.109896	0.835391
	CellCycle-S	18.6681	5.17858	1.11044e-13
	Cytotoxic	-0.323369	0.166418	0.749948
	Doublet-Platelet	1.1906	0.0751649	0.248473
	NME1/FABP5	3.2601	1.74097	0.00411917
	Th22	-2.39054	-0.68672	0.0273375
	MAIT	-3.47771	-1.85318	0.00251957
	CellCycle-Late-S	9.28807	5.57122	1.7059e-08
	Cytoskeleton	4.69375	0.993497	0.000158137
	Heatshock	-2.9367	-2.83937	0.00846652
	Multi-Cytokine	-3.0316	-0.51072	0.00686377
	TEMRA	1.99901	0.578286	0.0601176
	Doublet-Myeloid	-5.96977	-1.51706	9.57492e-06
	Metallothionein	-1.29422	-0.453437	0.2111
	CD4-CM	-6.40017	-1.38114	3.87944e-06
	IEG	-5.14957	-2.96736	5.69862e-05
	CD8-EM	-3.98128	-1.3	0.000799669
	IEG2	-4.82205	-2.95454	0.000118444
	CD4-Naive	-4.21839	-4.03026	0.000465381
	Treg	0.385155	-0.556667	0.7044
	Th17-Resting	-8.66487	-2.33793	5.01964e-08
	Poor-Quality	-2.72885	-0.386591	0.0133318
	CD8-Naive	-4.59767	-2.13846	0.000196495
	RGCC/MYADM	-3.0805	-1.54355	0.00615683
	TIMD4/TIM3	3.59388	1.30406	0.00193519
	Doublet-Plasmablast	-5.05925	-1.26049	6.9659e-05
	BCL2/FAM13A	-4.87054	-2.26149	0.000106223
	IL10/IL19	1.70563	0.216796	0.104373
	Th2-Activated	-1.27752	-0.375007	0.216808
	Th2-Resting	-7.83632	-2.484	2.27516e-07
	ICOS/CD38	3.75274	0.672943	0.00134753
	Doublet-Bcell	-0.883981	-0.623794	0.387756
	Th1-Like	-6.9296	-2.35067	1.3202e-06
	CTLA4/CD38	1.9605	0.393682	0.0647668
	CD8-Trm	-3.604	-0.779087	0.00189116
	Th17-Activated	1.3325	0.383833	0.198458
	Tfh-2	-2.25422	-0.41659	0.0361814
	OX40/EBI3	2.3261	0.608717	0.0312329
	CD172a/MERTK	-3.90801	-3.29179	0.000945366
	IEG3	-4.45932	-3.12643	0.000268909
	Doublet-Fibroblast	-2.451	-0.94973	0.024098
	SOX4/TOX2	1.15478	0.0517514	0.262497
	CD40LG/TXNIP	-4.9842	-3.19672	8.23548e-05
	Tph	0.703146	0.247958	0.490492
	Exhaustion	3.9217	0.675388	0.00091625
	Tfh-1	-0.7222	-0.254391	0.478967
TBRU
	GEP	T	logRatio	P
	CellCycle-G2M	27.502	5.22536	1.10047e-44
	Translation	-16.1623	-6.49177	6.16962e-28
	HLA	17.2228	1.66012	9.00544e-30
	ISG	-5.47452	-0.682377	4.18058e-07
	Mito	-22.6076	-1.43038	3.49621e-38
	Doublet-RBC	-4.76976	-0.93075	7.36204e-06
	gdT	-8.7218	-1.07407	1.66699e-13
	CellCycle-S	60.0842	5.16238	1.26776e-72
	Cytotoxic	-6.38302	-1.00807	8.17766e-09
	Doublet-Platelet	-4.69619	-0.385951	9.82057e-06
	NME1/FABP5	26.2308	2.29671	4.35824e-43
	Th22	-0.913803	-0.233344	0.363346
	MAIT	-13.9802	-1.78294	5.78195e-24
	CellCycle-Late-S	26.0425	5.10646	7.60615e-43
	Cytoskeleton	24.5587	1.6793	6.841e-41
	Heatshock	-8.92581	-0.354372	6.37262e-14
	Multi-Cytokine	-6.3306	-0.518985	1.03217e-08
	TEMRA	-2.29897	-0.342994	0.0239026
	Doublet-Myeloid	-21.328	-1.93323	2.58299e-36
	Metallothionein	9.14098	0.7946	2.31016e-14
	CD4-CM	-27.6221	-1.84371	7.82649e-45
	IEG	-19.2284	-3.98501	4.46164e-33
	CD8-EM	-8.79538	-1.0214	1.17858e-13
	IEG2	-10.0379	-3.30464	3.38374e-16
	CD4-Naive	-32.1337	-4.50317	4.82348e-50
	Treg	-9.06071	-0.955826	3.37314e-14
	Th17-Resting	-31.5211	-2.95887	2.25795e-49
	Poor-Quality	-14.7472	-0.935317	2.16976e-25
	CD8-Naive	-33.5054	-2.40404	1.66265e-51
	RGCC/MYADM	-14.7151	-0.822232	2.48579e-25
	TIMD4/TIM3	18.7271	2.31499	2.85529e-32
	Doublet-Plasmablast	-18.0965	-1.00354	3.07906e-31
	BCL2/FAM13A	-21.3438	-2.87761	2.44716e-36
	IL10/IL19	14.7005	1.03538	2.64425e-25
	Th2-Activated	-4.50565	-0.733259	2.04846e-05
	Th2-Resting	-22.6721	-2.98199	2.82706e-38
	ICOS/CD38	23.438	1.49129	2.34794e-39
	Doublet-Bcell	-15.1358	-0.699151	4.22767e-26
	Th1-Like	-25.1469	-2.79098	1.12206e-41
	CTLA4/CD38	14.0415	1.47952	4.43557e-24
	CD8-Trm	0.368573	-0.160314	0.713341
	Th17-Activated	10.6481	1.55602	1.94631e-17
	Tfh-2	-5.33616	-0.362843	7.44816e-07
	OX40/EBI3	14.7177	0.839745	2.4586e-25
	CD172a/MERTK	-29.1985	-4.54671	9.96789e-47
	IEG3	-17.5805	-2.55782	2.23499e-30
	Doublet-Fibroblast	-24.809	-1.57732	3.15694e-41
	SOX4/TOX2	-4.95903	-0.474799	3.47181e-06
	CD40LG/TXNIP	-27.4199	-4.25287	1.38984e-44
	Tph	14.0556	0.573205	4.17377e-24
	Exhaustion	21.3347	1.46927	2.52484e-36
	Tfh-1	-0.502522	-0.137265	0.61657
UK-Covid
	GEP	T	logRatio	P
	CellCycle-G2M	13.1927	4.6021	1.02785e-16
	Translation	-6.28485	-4.54049	1.40778e-07
	HLA	6.73898	0.994139	3.07622e-08
	ISG	-5.54482	-0.58567	1.67245e-06
	Mito	-2.09757	-0.401382	0.0418582
	Doublet-RBC	-2.12983	-0.440464	0.0389494
	gdT	-3.35439	-0.482707	0.00166945
	CellCycle-S	33.5785	4.78966	1.73745e-32
	Cytotoxic	-3.48384	-0.476238	0.0011495
	Doublet-Platelet	-1.65234	-0.623907	0.10575
	NME1/FABP5	8.18916	1.17257	2.56218e-10
	Th22	-1.85722	-0.483466	0.0701373
	MAIT	-8.87293	-1.66213	2.85619e-11
	CellCycle-Late-S	22.6596	5.28998	1.55639e-25
	Cytoskeleton	1.34598	0.0805004	0.185361
	Heatshock	-0.253288	-0.0829487	0.801253
	Multi-Cytokine	-0.20192	-0.310618	0.840932
	TEMRA	3.9478	0.450781	0.000287625
	Doublet-Myeloid	-5.77906	-1.79444	7.65686e-07
	Metallothionein	5.67567	0.716402	1.08137e-06
	CD4-CM	-10.1614	-1.39041	5.29772e-13
	IEG	-7.49579	-2.98082	2.48195e-09
	CD8-EM	-7.89649	-1.10641	6.64764e-10
	IEG2	-13.1447	-2.59388	1.16623e-16
	CD4-Naive	-10.6897	-4.48999	1.09678e-13
	Treg	-3.94038	-0.985221	0.000294221
	Th17-Resting	-7.98164	-2.371	5.0332e-10
	Poor-Quality	-7.3084	-0.70349	4.61467e-09
	CD8-Naive	-14.6757	-3.45931	2.37917e-18
	RGCC/MYADM	-6.76481	-0.521728	2.82163e-08
	TIMD4/TIM3	8.23972	1.2611	2.17491e-10
	Doublet-Plasmablast	-12.7174	-1.4366	3.63408e-16
	BCL2/FAM13A	-12.4369	-3.06143	7.75978e-16
	IL10/IL19	2.16852	0.179495	0.0356967
	Th2-Activated	-7.74396	-0.719152	1.09593e-09
	Th2-Resting	-9.93787	-2.74675	1.04266e-12
	ICOS/CD38	5.52851	0.571694	1.76575e-06
	Doublet-Bcell	-4.72561	-0.889314	2.47312e-05
	Th1-Like	-11.4225	-2.07575	1.31051e-14
	CTLA4/CD38	5.83728	0.793357	6.30295e-07
	CD8-Trm	-6.85144	-0.754782	2.11242e-08
	Th17-Activated	3.39303	0.434063	0.00149445
	Tfh-2	-7.84377	-0.717151	7.89969e-10
	OX40/EBI3	3.63445	0.245322	0.00073891
	CD172a/MERTK	-11.2941	-3.02846	1.89205e-14
	IEG3	-10.5095	-2.92653	1.86951e-13
	Doublet-Fibroblast	-7.36734	-1.177	3.79588e-09
	SOX4/TOX2	-5.52669	-0.767183	1.77645e-06
	CD40LG/TXNIP	-17.2068	-3.34805	6.74545e-21
	Tph	4.45124	0.42088	5.96633e-05
	Exhaustion	5.33417	0.526048	3.36624e-06
	Tfh-1	-9.00425	-0.849613	1.88514e-11

## Sheet: S7 - Disease Associations
Table S7. Association with disease. Ordinary least squares regression coefficients (Beta), P-values (P), FDR-corrected Q-values (Q), and average fold changes (FC) for phenotype associations shown in Extended Data Fig. 7.
COMBAT - COVID_vs_Healthy
	GEP	P	Beta	M0	M1	FC	log2_FC	Q	Pheno	logP	logQ
	IEG2	1.32333e-18	0.0157423	0.00393112	0.0194081	4.93704	2.30365	6.88131e-17	COVID_vs_Healthy	17.8783	16.1623
	YPEL5/JUNB	5.34805e-17	0.0114505	0.00753818	0.0188174	2.49628	1.31978	1.39049e-15	COVID_vs_Healthy	16.2718	14.8568
	Doublet-Fibroblast	3.97767e-12	-0.00295793	0.0102286	0.00719115	0.703043	-0.508315	6.89464e-11	COVID_vs_Healthy	11.4004	10.1615
	CD40LG/TXNIP	9.35137e-11	0.0169079	0.0269883	0.0435631	1.61415	0.690773	1.12565e-09	COVID_vs_Healthy	10.0291	8.9486
	Doublet-Plasmablast	1.08236e-10	-0.0086574	0.0391049	0.0299808	0.766675	-0.383313	1.12565e-09	COVID_vs_Healthy	9.96563	8.9486
	Tph	1.09867e-09	0.00212463	0.00365001	0.0057555	1.57684	0.65704	9.52181e-09	COVID_vs_Healthy	8.95913	8.02128
	Treg	2.49036e-09	0.00865269	0.0190873	0.0275615	1.44397	0.530044	1.84998e-08	COVID_vs_Healthy	8.60374	7.73283
	CellCycle-S	5.28732e-08	0.00318313	0.00152046	0.00462655	3.04286	1.60543	3.43632e-07	COVID_vs_Healthy	7.27676	6.46391
	Mito	5.94748e-08	-0.014975	0.0239521	0.00868946	0.362785	-1.46281	3.43632e-07	COVID_vs_Healthy	7.22567	6.46391
	CellCycle-Late-S	7.58679e-08	0.00118287	0.000894248	0.00204508	2.28693	1.19341	3.94513e-07	COVID_vs_Healthy	7.11994	6.40394
	BCL2-Survival	1.80407e-07	0.019962	0.0211405	0.0418728	1.9807	0.986007	8.52834e-07	COVID_vs_Healthy	6.74375	6.06914
	CellCycle-G2M	1.07844e-06	0.00110984	0.000619707	0.00170451	2.75051	1.4597	4.67325e-06	COVID_vs_Healthy	5.9672	5.33038
	IEG	1.85179e-06	0.018527	0.0130475	0.0319903	2.45183	1.29386	7.40716e-06	COVID_vs_Healthy	5.73241	5.13035
	Early-Activation	7.45191e-06	0.00501873	0.00548073	0.0105589	1.92656	0.946024	2.76785e-05	COVID_vs_Healthy	5.12773	4.55786
	CD4-EM	2.40727e-05	-0.0101243	0.034884	0.0247032	0.708154	-0.497866	8.3452e-05	COVID_vs_Healthy	4.61848	4.07856
	Exhaustion	6.80911e-05	0.00217773	0.00508719	0.00727309	1.42969	0.515698	0.000221296	COVID_vs_Healthy	4.16691	3.65503
	Doublet-Bcell	8.68914e-05	-0.000832692	0.00679986	0.0059013	0.867855	-0.204473	0.000260123	COVID_vs_Healthy	4.06102	3.58482
	Doublet-Myeloid	9.00425e-05	0.00365053	0.0214943	0.0241382	1.123	0.167363	0.000260123	COVID_vs_Healthy	4.04555	3.58482
	Cytoskeleton	0.00020882	0.0019693	0.00653155	0.00867329	1.32791	0.409155	0.000571507	COVID_vs_Healthy	3.68023	3.24298
	Metallothionein	0.000559947	0.000570184	0.00253087	0.00312066	1.23304	0.302221	0.00145586	COVID_vs_Healthy	3.25185	2.83688
	CTLA4+/CD38+-Activation	0.000639068	0.00153124	0.00529417	0.00680125	1.28467	0.361397	0.00158245	COVID_vs_Healthy	3.19445	2.80067
	HLA	0.00103897	0.00293793	0.00631074	0.00926957	1.46886	0.554692	0.00245575	COVID_vs_Healthy	2.9834	2.60982
	TIMD4/TIM3-Activation	0.00168971	0.00432514	0.00400222	0.00815705	2.03813	1.02725	0.00382021	COVID_vs_Healthy	2.77219	2.41791
	ISG	0.00238511	0.0194807	0.0108454	0.0298436	2.75174	1.46034	0.00516775	COVID_vs_Healthy	2.62249	2.2867
	OX40/EBI3-Activation	0.00924337	0.00169069	0.00679997	0.00866673	1.27452	0.349959	0.0192262	COVID_vs_Healthy	2.03417	1.71611
	CD8-EM	0.0365774	-0.016266	0.0510061	0.0347038	0.680386	-0.555576	0.0731549	COVID_vs_Healthy	1.43679	1.13576
	MAIT	0.0421839	-0.0100674	0.026457	0.0162175	0.612974	-0.706102	0.081243	COVID_vs_Healthy	1.37485	1.09021
	CD4-Naive	0.051908	-0.0207118	0.105406	0.0856373	0.812455	-0.29964	0.0964006	COVID_vs_Healthy	1.28477	1.01592
	NK-like	0.0546909	-0.00919442	0.0289861	0.0198225	0.683864	-0.548219	0.0980665	COVID_vs_Healthy	1.26208	1.00848
	Multi-Cytokine	0.0580487	-0.00271159	0.0107036	0.00818348	0.764552	-0.387313	0.0995296	COVID_vs_Healthy	1.23621	1.00205
	HeatShock	0.0606214	-0.00132789	0.0102892	0.00904033	0.878625	-0.186681	0.0995296	COVID_vs_Healthy	1.21737	1.00205
	Tfh-1	0.061249	-0.00100996	0.010156	0.00921059	0.906909	-0.140971	0.0995296	COVID_vs_Healthy	1.2129	1.00205
	TXNIP/H1FX	0.0925481	0.00332364	0.0226478	0.0261987	1.15679	0.210121	0.145833	COVID_vs_Healthy	1.03363	0.836143
	Translation	0.0972253	-0.0178582	0.0867654	0.0692745	0.798412	-0.324795	0.148697	COVID_vs_Healthy	1.01222	0.827696
	CD8-Trm-Like	0.103036	-0.0016786	0.012761	0.0110622	0.866877	-0.206101	0.153083	COVID_vs_Healthy	0.98701	0.815074
	Th17	0.109891	0.00371323	0.0215409	0.025139	1.16704	0.222849	0.158732	COVID_vs_Healthy	0.959037	0.799336
	RGCC/MYADM	0.127934	-0.00173262	0.0141518	0.012363	0.873602	-0.194952	0.179799	COVID_vs_Healthy	0.893016	0.745214
	Cytotoxic	0.230975	-0.0207581	0.069075	0.0490609	0.710256	-0.493588	0.316071	COVID_vs_Healthy	0.636435	0.500215
	Th2-2	0.239353	0.000392843	0.00519867	0.0055953	1.07629	0.106073	0.319137	COVID_vs_Healthy	0.620961	0.496022
	gdT-Blood	0.298935	-0.00227096	0.0191782	0.0170655	0.889839	-0.168384	0.388615	COVID_vs_Healthy	0.524424	0.41048
	IL10/IL19-Secretion	0.352463	-0.00047162	0.00726251	0.00674463	0.928691	-0.106729	0.447026	COVID_vs_Healthy	0.452887	0.349667
	CD8-Naive	0.39159	-0.00589716	0.0559643	0.0506653	0.905314	-0.14351	0.484825	COVID_vs_Healthy	0.407169	0.314415
	Tfh-2	0.447798	-0.000504583	0.0107277	0.010213	0.952017	-0.0709405	0.541523	COVID_vs_Healthy	0.348918	0.266383
	ICOS/CD38-Activation	0.513947	0.000396302	0.00610643	0.00653266	1.0698	0.0973417	0.607391	COVID_vs_Healthy	0.289082	0.216531
	Doublet-Platelet	0.528212	-6.93194e-05	0.00372319	0.00362622	0.973955	-0.0380733	0.610119	COVID_vs_Healthy	0.277192	0.214585
	Th17-2	0.539721	-0.000173215	0.00397926	0.00378338	0.950774	-0.072825	0.610119	COVID_vs_Healthy	0.267831	0.214585
	Doublet-RBC	0.662629	3.35856e-05	0.00125162	0.00130181	1.04011	0.0567308	0.733121	COVID_vs_Healthy	0.17873	0.134824
	SOX4/TOX2	0.713269	0.000191776	0.00716596	0.00727443	1.01514	0.0216723	0.772708	COVID_vs_Healthy	0.146747	0.111985
	CD4-CM	0.744656	0.000571036	0.0192342	0.0199359	1.03648	0.051693	0.790247	COVID_vs_Healthy	0.128045	0.102237
	CCR10-Migration	0.892237	-0.000222738	0.0207013	0.0207127	1.00055	0.000787974	0.927927	COVID_vs_Healthy	0.0495197	0.0324863
	MALAT1	0.911349	-0.000349141	0.0529529	0.0513126	0.969023	-0.0453967	0.929219	COVID_vs_Healthy	0.0403152	0.031882
	Th2-1	0.998076	5.36829e-06	0.0288444	0.0290096	1.00573	0.00824351	0.998076	COVID_vs_Healthy	0.000836394	0.000836394
COMBAT - COVID_Severe_vs_Mild
	GEP	P	Beta	M0	M1	FC	log2_FC	Q	Pheno	logP	logQ
	CD4-EM	6.49461e-06	-0.00877713	0.0265961	0.0189248	0.711562	-0.490938	0.00017374	COVID_Severe_vs_Mild	5.18745	3.7601
	RGCC/MYADM	6.68232e-06	-0.00528795	0.0136488	0.00843798	0.61822	-0.693807	0.00017374	COVID_Severe_vs_Mild	5.17507	3.7601
	BCL2-Survival	0.000607132	0.0123613	0.038736	0.0514483	1.32818	0.409448	0.00798727	COVID_Severe_vs_Mild	3.21672	2.0976
	MALAT1	0.000798818	-0.00805436	0.0540371	0.0429957	0.795671	-0.329757	0.00798727	COVID_Severe_vs_Mild	3.09755	2.0976
	gdT-Blood	0.000818019	-0.00551722	0.0182054	0.0135856	0.74624	-0.422289	0.00798727	COVID_Severe_vs_Mild	3.08724	2.0976
	CD8-EM	0.000921608	-0.0135276	0.0374656	0.0262729	0.701252	-0.511994	0.00798727	COVID_Severe_vs_Mild	3.03545	2.0976
	CD4-Naive	0.00198501	0.0177739	0.0806262	0.100934	1.25188	0.324098	0.0147458	COVID_Severe_vs_Mild	2.70224	1.83133
	Tph	0.00255247	0.00111474	0.00552562	0.00645723	1.1686	0.22478	0.016591	COVID_Severe_vs_Mild	2.59304	1.78013
	HLA	0.00405238	-0.00223541	0.00966983	0.00804773	0.832252	-0.264908	0.0234138	COVID_Severe_vs_Mild	2.39229	1.63053
	Cytotoxic	0.00523923	-0.0217702	0.0533582	0.035943	0.673617	-0.57	0.027244	COVID_Severe_vs_Mild	2.28073	1.56473
	CD40LG/TXNIP	0.0189037	0.00944234	0.0419593	0.0484588	1.1549	0.207768	0.0893628	COVID_Severe_vs_Mild	1.72345	1.04884
	Early-Activation	0.0346248	0.00477773	0.0093837	0.0141465	1.50756	0.592213	0.150041	COVID_Severe_vs_Mild	1.46061	0.82379
	Doublet-Bcell	0.045373	-0.000379397	0.00606246	0.00540933	0.892267	-0.164453	0.181492	COVID_Severe_vs_Mild	1.3432	0.741142
	Multi-Cytokine	0.0677944	-0.00171609	0.00845548	0.00735316	0.869632	-0.201523	0.237026	COVID_Severe_vs_Mild	1.16881	0.625205
	IL10/IL19-Secretion	0.0683728	-0.000801788	0.00689493	0.00628581	0.911656	-0.133438	0.237026	COVID_Severe_vs_Mild	1.16512	0.625205
	Doublet-Fibroblast	0.074253	-0.000545705	0.0073425	0.00672913	0.916462	-0.125853	0.239628	COVID_Severe_vs_Mild	1.12929	0.620462
	OX40/EBI3-Activation	0.07834	0.0012873	0.00828411	0.00983471	1.18718	0.247537	0.239628	COVID_Severe_vs_Mild	1.10602	0.620462
	Cytoskeleton	0.0994287	0.00150879	0.00822566	0.0100398	1.22054	0.287521	0.268162	COVID_Severe_vs_Mild	1.00249	0.571603
	Treg	0.103013	0.00318007	0.0270549	0.029108	1.07588	0.105521	0.268162	COVID_Severe_vs_Mild	0.987107	0.571603
	Translation	0.103139	0.0207141	0.0639744	0.0854538	1.33575	0.41765	0.268162	COVID_Severe_vs_Mild	0.986577	0.571603
	CD8-Naive	0.142545	0.00634143	0.048532	0.0571773	1.17813	0.236504	0.352968	COVID_Severe_vs_Mild	0.846049	0.452265
	NK-like	0.160043	-0.0037743	0.0205722	0.0175339	0.852311	-0.230549	0.378283	COVID_Severe_vs_Mild	0.795764	0.422183
	CTLA4+/CD38+-Activation	0.212716	0.000852529	0.00659816	0.00742124	1.12474	0.169597	0.480924	COVID_Severe_vs_Mild	0.672199	0.317923
	IEG2	0.236115	0.00522067	0.0186544	0.0217089	1.16374	0.21877	0.503082	COVID_Severe_vs_Mild	0.626876	0.298362
	MAIT	0.241866	-0.00234018	0.016825	0.0143629	0.853666	-0.228256	0.503082	COVID_Severe_vs_Mild	0.616425	0.298362
	CD8-Trm-Like	0.297288	-0.000966114	0.0111987	0.0106455	0.950599	-0.0730913	0.594575	COVID_Severe_vs_Mild	0.526823	0.225793
	TIMD4/TIM3-Activation	0.348547	-0.00196727	0.00854123	0.00698431	0.817717	-0.290327	0.671276	COVID_Severe_vs_Mild	0.457738	0.173099
	CD4-CM	0.397408	-0.000970433	0.0200164	0.0196903	0.98371	-0.0236946	0.738043	COVID_Severe_vs_Mild	0.400764	0.131919
	IEG	0.420486	-0.00375235	0.0332261	0.0282176	0.849258	-0.235726	0.753975	COVID_Severe_vs_Mild	0.376248	0.122643
	Th2-1	0.47411	0.00271049	0.0285234	0.0304941	1.06909	0.0963846	0.821791	COVID_Severe_vs_Mild	0.324121	0.0852386
	CellCycle-S	0.53756	0.000747289	0.00443457	0.00521262	1.17545	0.233216	0.901713	COVID_Severe_vs_Mild	0.269573	0.0449314
	Doublet-Plasmablast	0.563289	-0.000853754	0.030322	0.0289392	0.954396	-0.06734	0.915345	COVID_Severe_vs_Mild	0.249269	0.0384152
	SOX4/TOX2	0.650573	-0.000268396	0.00735833	0.0070183	0.95379	-0.0682562	0.989682	COVID_Severe_vs_Mild	0.186704	0.00450413
	Mito	0.73308	-0.000446402	0.00884916	0.00820197	0.926865	-0.10957	0.989682	COVID_Severe_vs_Mild	0.134849	0.00450413
	CellCycle-G2M	0.741892	0.000138772	0.00165914	0.001843	1.11082	0.15162	0.989682	COVID_Severe_vs_Mild	0.129659	0.00450413
	Metallothionein	0.7854	-6.30672e-05	0.00313038	0.00309102	0.987426	-0.0182558	0.989682	COVID_Severe_vs_Mild	0.104909	0.00450413
	Th17-2	0.797497	-0.000117793	0.00381381	0.00369047	0.96766	-0.0474271	0.989682	COVID_Severe_vs_Mild	0.0982708	0.00450413
	Exhaustion	0.798536	-0.000176121	0.00726867	0.00728657	1.00246	0.00354852	0.989682	COVID_Severe_vs_Mild	0.0977058	0.00450413
	ISG	0.79881	-0.00243653	0.0315033	0.0247771	0.786492	-0.346496	0.989682	COVID_Severe_vs_Mild	0.0975564	0.00450413
	Doublet-Platelet	0.814896	-2.53736e-05	0.00365495	0.00353853	0.968148	-0.0466999	0.989682	COVID_Severe_vs_Mild	0.088898	0.00450413
	Th17	0.816945	-0.000524252	0.025469	0.0241317	0.947492	-0.077814	0.989682	COVID_Severe_vs_Mild	0.087807	0.00450413
	HeatShock	0.836337	-0.000243385	0.0090916	0.00888384	0.977148	-0.0333516	0.989682	COVID_Severe_vs_Mild	0.0776185	0.00450413
	CCR10-Migration	0.859925	-0.000392635	0.0208111	0.0204122	0.980832	-0.0279222	0.989682	COVID_Severe_vs_Mild	0.0655393	0.00450413
	Th2-2	0.861695	7.90689e-05	0.00560528	0.00556481	0.992779	-0.0104552	0.989682	COVID_Severe_vs_Mild	0.0646465	0.00450413
	Tfh-1	0.88648	7.61288e-05	0.00910925	0.00951994	1.04508	0.0636192	0.989682	COVID_Severe_vs_Mild	0.0523311	0.00450413
	ICOS/CD38-Activation	0.896077	-9.92962e-05	0.00645445	0.00677143	1.04911	0.0691662	0.989682	COVID_Severe_vs_Mild	0.0476547	0.00450413
	CellCycle-Late-S	0.903353	5.06484e-05	0.00202719	0.00209968	1.03576	0.0506843	0.989682	COVID_Severe_vs_Mild	0.0441425	0.00450413
	YPEL5/JUNB	0.913553	-0.000267985	0.0190735	0.0180354	0.945574	-0.080738	0.989682	COVID_Severe_vs_Mild	0.0392662	0.00450413
	Tfh-2	0.934744	-4.65695e-05	0.0101568	0.0103843	1.02239	0.031949	0.991107	COVID_Severe_vs_Mild	0.0293075	0.00387941
	Doublet-Myeloid	0.963333	-5.39343e-05	0.0248146	0.0220731	0.889519	-0.168903	0.991107	COVID_Severe_vs_Mild	0.0162238	0.00387941
	Doublet-RBC	0.98086	-1.90927e-06	0.00127363	0.00138785	1.08968	0.123905	0.991107	COVID_Severe_vs_Mild	0.00839318	0.00387941
	TXNIP/H1FX	0.991107	2.35233e-05	0.025925	0.0270343	1.04279	0.0604516	0.991107	COVID_Severe_vs_Mild	0.00387941	0.00387941
UK-Covid - COVID_vs_Healthy
	GEP	P	Beta	M0	M1	FC	log2_FC	Q	Pheno	logP	logQ
	Tph	5.34416e-13	0.00351169	0.0044005	0.00851436	1.93486	0.95223	2.77896e-11	COVID_vs_Healthy	12.2721	10.5561
	Mito	1.83958e-12	-0.0211357	0.0381909	0.0155181	0.406331	-1.29927	4.78291e-11	COVID_vs_Healthy	11.7353	10.3203
	Metallothionein	3.73496e-12	0.001541	0.00288732	0.00401606	1.39093	0.47605	5.98027e-11	COVID_vs_Healthy	11.4277	10.2233
	Exhaustion	4.60021e-12	0.00551259	0.00700492	0.0140914	2.01164	1.00837	5.98027e-11	COVID_vs_Healthy	11.3372	10.2233
	CellCycle-S	4.64862e-10	0.00264003	0.00504971	0.00804758	1.59367	0.672354	4.83457e-09	COVID_vs_Healthy	9.33268	8.31564
	CellCycle-G2M	7.46569e-09	0.000792064	0.00155492	0.00244589	1.573	0.653516	6.47026e-08	COVID_vs_Healthy	8.12693	7.18908
	CD4-EM	2.47104e-08	-0.00911601	0.0279413	0.0187924	0.672569	-0.572246	1.83563e-07	COVID_vs_Healthy	7.60712	6.73621
	OX40/EBI3-Activation	3.30555e-08	0.00365877	0.0105211	0.014866	1.41298	0.498737	2.0371e-07	COVID_vs_Healthy	7.48076	6.69099
	TIMD4/TIM3-Activation	3.75099e-08	0.00507412	0.00747223	0.0133017	1.78015	0.831998	2.0371e-07	COVID_vs_Healthy	7.42585	6.69099
	ISG	3.91751e-08	0.0235763	0.00678267	0.0345686	5.09661	2.34954	2.0371e-07	COVID_vs_Healthy	7.40699	6.69099
	Translation	6.75296e-08	-0.027073	0.0566741	0.025331	0.446958	-1.16179	3.19231e-07	COVID_vs_Healthy	7.17051	6.4959
	CTLA4+/CD38+-Activation	1.01658e-07	0.00169825	0.00705717	0.00920037	1.30369	0.382602	4.40517e-07	COVID_vs_Healthy	6.99286	6.35604
	TXNIP/H1FX	2.62245e-07	-0.00794824	0.0236139	0.0126731	0.536681	-0.897864	1.04898e-06	COVID_vs_Healthy	6.58129	5.97923
	Early-Activation	3.89696e-07	0.0081534	0.0198501	0.0301615	1.51946	0.603563	1.44744e-06	COVID_vs_Healthy	6.40927	5.8394
	CellCycle-Late-S	4.57659e-07	0.000904259	0.00196479	0.00291106	1.48161	0.567167	1.58655e-06	COVID_vs_Healthy	6.33946	5.79955
	Cytoskeleton	1.4883e-06	0.00644016	0.0188678	0.0270566	1.43401	0.520055	4.76058e-06	COVID_vs_Healthy	5.82731	5.32234
	BCL2-Survival	1.55634e-06	0.0200771	0.0272806	0.0456323	1.6727	0.742181	4.76058e-06	COVID_vs_Healthy	5.80789	5.32234
	Doublet-Myeloid	8.174e-05	0.0138312	0.0111937	0.0265107	2.36836	1.24389	0.000236138	COVID_vs_Healthy	4.08757	3.62683
	MAIT	0.000365969	-0.0102986	0.0252317	0.0145048	0.574864	-0.798707	0.0010016	COVID_vs_Healthy	3.43656	2.99931
	CD40LG/TXNIP	0.0010373	0.00444307	0.0208237	0.0253804	1.21882	0.285485	0.00269699	COVID_vs_Healthy	2.98409	2.56912
	Doublet-Fibroblast	0.00328846	-0.00121478	0.00864228	0.00664861	0.769312	-0.37836	0.00814287	COVID_vs_Healthy	2.48301	2.08922
	HeatShock	0.00908026	0.0022226	0.0114232	0.0139124	1.21791	0.28441	0.0214624	COVID_vs_Healthy	2.0419	1.66832
	CD4-Naive	0.0137547	-0.0154605	0.0846085	0.0633141	0.748318	-0.418276	0.0310976	COVID_vs_Healthy	1.86155	1.50727
	Multi-Cytokine	0.0283673	0.00219564	0.0071536	0.00980542	1.3707	0.45491	0.0614625	COVID_vs_Healthy	1.54718	1.21139
	RGCC/MYADM	0.0331562	-0.00337568	0.0199021	0.0160844	0.808177	-0.307258	0.0684597	COVID_vs_Healthy	1.47944	1.16456
	CD8-Trm-Like	0.0342299	-0.0028571	0.0165691	0.01406	0.848572	-0.236892	0.0684597	COVID_vs_Healthy	1.46559	1.16456
	CD8-Naive	0.0448075	-0.00870816	0.0532349	0.0418841	0.786779	-0.345969	0.086296	COVID_vs_Healthy	1.34865	1.06401
	CD8-EM	0.0701187	-0.00725175	0.0348473	0.0300448	0.862184	-0.213932	0.130221	COVID_vs_Healthy	1.15417	0.885321
	Doublet-Platelet	0.0791756	0.00180667	0.00607539	0.00660686	1.08748	0.12099	0.14197	COVID_vs_Healthy	1.10141	0.847803
	Th17	0.0919692	-0.00324108	0.0212273	0.0175583	0.827157	-0.273767	0.157231	COVID_vs_Healthy	1.03636	0.803461
	SOX4/TOX2	0.093734	-0.00167221	0.0101769	0.00787153	0.773471	-0.370581	0.157231	COVID_vs_Healthy	1.0281	0.803461
	Th17-2	0.0980931	-0.00053731	0.005766	0.00560996	0.972939	-0.0395783	0.159401	COVID_vs_Healthy	1.00836	0.797508
	gdT-Blood	0.119069	-0.00483501	0.0226566	0.018941	0.836003	-0.25842	0.187495	COVID_vs_Healthy	0.9242	0.727011
	Doublet-Bcell	0.125436	-0.000579353	0.00643201	0.00541641	0.842103	-0.247931	0.187495	COVID_vs_Healthy	0.901579	0.727011
	HLA	0.126198	0.00253266	0.00889335	0.012618	1.41881	0.504681	0.187495	COVID_vs_Healthy	0.898946	0.727011
	Treg	0.143601	0.00135037	0.0174697	0.0190858	1.09251	0.127642	0.207424	COVID_vs_Healthy	0.842842	0.683141
	Doublet-RBC	0.245787	0.000417136	0.00153437	0.00155595	1.01407	0.0201507	0.345431	COVID_vs_Healthy	0.60944	0.461639
	Cytotoxic	0.344722	0.0102784	0.0521428	0.0687104	1.31773	0.39806	0.471725	COVID_vs_Healthy	0.46253	0.326311
	Th2-2	0.356307	-0.000472044	0.00687359	0.00607427	0.883711	-0.178353	0.475077	COVID_vs_Healthy	0.448175	0.323236
	NK-like	0.383292	0.00252259	0.0195109	0.0235924	1.20919	0.274045	0.498279	COVID_vs_Healthy	0.416471	0.302527
	ICOS/CD38-Activation	0.424907	0.00053213	0.00993989	0.0105961	1.06602	0.0922351	0.538907	COVID_vs_Healthy	0.371706	0.268486
	Tfh-1	0.453273	-0.00037331	0.0100616	0.0102543	1.01915	0.027365	0.561195	COVID_vs_Healthy	0.34364	0.250886
	IEG2	0.567588	0.00147512	0.0203204	0.0202958	0.99879	-0.00174722	0.672558	COVID_vs_Healthy	0.245967	0.17227
	MALAT1	0.569087	-0.00267204	0.0506921	0.0584127	1.1523	0.204519	0.672558	COVID_vs_Healthy	0.244821	0.17227
	Doublet-Plasmablast	0.614821	0.00076616	0.0227574	0.0229904	1.01024	0.0146961	0.71046	COVID_vs_Healthy	0.211251	0.14846
	YPEL5/JUNB	0.632028	0.00163305	0.0286086	0.0262401	0.917212	-0.124672	0.714467	COVID_vs_Healthy	0.199264	0.146018
	Tfh-2	0.6997	-0.000167804	0.0103873	0.0101781	0.979859	-0.0293539	0.774136	COVID_vs_Healthy	0.155088	0.111182
	IL10/IL19-Secretion	0.814269	-8.73163e-05	0.00839308	0.00845095	1.00689	0.00991314	0.868182	COVID_vs_Healthy	0.0892319	0.0613894
	Th2-1	0.818094	-0.000581596	0.0233004	0.0213797	0.917568	-0.124113	0.868182	COVID_vs_Healthy	0.0871967	0.0613894
	CCR10-Migration	0.853671	-0.00032324	0.0206015	0.0207587	1.00763	0.0109671	0.876031	COVID_vs_Healthy	0.0687097	0.0574803
	CD4-CM	0.859185	0.000201042	0.0183633	0.0175092	0.953489	-0.0687114	0.876031	COVID_vs_Healthy	0.0659135	0.0574803
	IEG	0.958919	0.000194083	0.0370715	0.0300153	0.809659	-0.304614	0.958919	COVID_vs_Healthy	0.0182182	0.0182182
UK-Covid - COVID_Severe_vs_Mild
	GEP	P	Beta	M0	M1	FC	log2_FC	Q	Pheno	logP	logQ
	ISG	1.27472e-05	-0.0240715	0.0388036	0.0146034	0.376342	-1.40989	0.000662853	COVID_Severe_vs_Mild	4.89459	3.17858
	ICOS/CD38-Activation	0.00137789	0.00338712	0.00999427	0.0134335	1.34412	0.42666	0.035825	COVID_Severe_vs_Mild	2.86079	1.44581
	CD4-CM	0.00625539	0.00441006	0.016697	0.021338	1.27796	0.353841	0.108427	COVID_Severe_vs_Mild	2.20375	0.964863
	BCL2-Survival	0.0204725	0.0165787	0.0427161	0.0593804	1.39012	0.475208	0.235361	COVID_Severe_vs_Mild	1.68883	0.628265
	MALAT1	0.0226309	-0.0100115	0.0601918	0.0500252	0.831095	-0.266914	0.235361	COVID_Severe_vs_Mild	1.6453	0.628265
	CTLA4+/CD38+-Activation	0.035219	0.000892375	0.00904869	0.00991541	1.09578	0.131964	0.305232	COVID_Severe_vs_Mild	1.45322	0.51537
	Doublet-Plasmablast	0.0452337	-0.00354488	0.0236296	0.0199766	0.845404	-0.242287	0.336022	COVID_Severe_vs_Mild	1.34454	0.473633
	CCR10-Migration	0.0741835	0.00466534	0.0199844	0.0244091	1.22141	0.288545	0.475222	COVID_Severe_vs_Mild	1.12969	0.323104
	Cytoskeleton	0.0822499	0.00442678	0.0263333	0.0304666	1.15696	0.210341	0.475222	COVID_Severe_vs_Mild	1.08486	0.323104
	Tfh-1	0.116746	0.00107611	0.0100593	0.0111739	1.1108	0.151601	0.513733	COVID_Severe_vs_Mild	0.932756	0.289263
	Early-Activation	0.132801	0.00593509	0.0291842	0.0347691	1.19137	0.252621	0.513733	COVID_Severe_vs_Mild	0.876798	0.289263
	CD4-Naive	0.133552	0.0153639	0.0605069	0.0765477	1.26511	0.339258	0.513733	COVID_Severe_vs_Mild	0.874351	0.289263
	Doublet-Bcell	0.149149	-0.000757988	0.00553118	0.00487535	0.88143	-0.182081	0.513733	COVID_Severe_vs_Mild	0.826379	0.289263
	gdT-Blood	0.151828	-0.00400041	0.0197073	0.015328	0.777784	-0.362559	0.513733	COVID_Severe_vs_Mild	0.818649	0.289263
	Doublet-Myeloid	0.156997	-0.00846952	0.0281446	0.0188077	0.668253	-0.581533	0.513733	COVID_Severe_vs_Mild	0.804109	0.289263
	OX40/EBI3-Activation	0.159635	0.00153866	0.0146136	0.0160563	1.09872	0.135828	0.513733	COVID_Severe_vs_Mild	0.796872	0.289263
	NK-like	0.178217	-0.00405263	0.0243678	0.0199367	0.818158	-0.289549	0.513733	COVID_Severe_vs_Mild	0.749051	0.289263
	Doublet-RBC	0.19855	0.000686134	0.00142602	0.0021685	1.52066	0.604702	0.513733	COVID_Severe_vs_Mild	0.702131	0.289263
	IEG	0.209193	0.00548662	0.0288347	0.0355811	1.23397	0.303305	0.513733	COVID_Severe_vs_Mild	0.679453	0.289263
	CD4-EM	0.214776	-0.00309047	0.0193287	0.0162645	0.841468	-0.24902	0.513733	COVID_Severe_vs_Mild	0.668014	0.289263
	Metallothionein	0.21698	-0.000532353	0.0041035	0.00360384	0.878236	-0.18732	0.513733	COVID_Severe_vs_Mild	0.663581	0.289263
	Translation	0.222988	0.00709149	0.0240448	0.0313942	1.30565	0.384772	0.513733	COVID_Severe_vs_Mild	0.651718	0.289263
	CD8-EM	0.235917	-0.00445436	0.0308872	0.0260735	0.844152	-0.244425	0.513733	COVID_Severe_vs_Mild	0.627241	0.289263
	CellCycle-S	0.244787	0.00166744	0.00777356	0.00933938	1.20143	0.264751	0.513733	COVID_Severe_vs_Mild	0.611211	0.289263
	CD8-Trm-Like	0.253756	-0.00130337	0.0143143	0.0128614	0.898501	-0.154409	0.513733	COVID_Severe_vs_Mild	0.595583	0.289263
	Multi-Cytokine	0.256866	-0.00144537	0.0100355	0.00872055	0.868967	-0.202627	0.513733	COVID_Severe_vs_Mild	0.590293	0.289263
	MAIT	0.277845	-0.00273236	0.0149547	0.0123836	0.828069	-0.272177	0.535108	COVID_Severe_vs_Mild	0.556198	0.271558
	RGCC/MYADM	0.330999	0.00168425	0.0157452	0.0176832	1.12309	0.167467	0.595094	COVID_Severe_vs_Mild	0.480173	0.225414
	Th17	0.331879	0.0021301	0.0171597	0.0194371	1.13272	0.179786	0.595094	COVID_Severe_vs_Mild	0.47902	0.225414
	Exhaustion	0.346338	-0.0011645	0.0143368	0.0129344	0.902183	-0.148508	0.600082	COVID_Severe_vs_Mild	0.4605	0.221789
	Th2-1	0.359779	-0.00185133	0.0217184	0.019783	0.910884	-0.134661	0.600082	COVID_Severe_vs_Mild	0.443964	0.221789
	CellCycle-Late-S	0.369282	0.000431658	0.00284144	0.00323926	1.14001	0.18904	0.600082	COVID_Severe_vs_Mild	0.432642	0.221789
	Tfh-2	0.417063	0.000455575	0.0100865	0.0106102	1.05193	0.0730385	0.65719	COVID_Severe_vs_Mild	0.379799	0.182309
	IL10/IL19-Secretion	0.456592	0.000421474	0.0083758	0.00880522	1.05127	0.0721335	0.682466	COVID_Severe_vs_Mild	0.340472	0.165919
	Tph	0.478277	-0.000454208	0.00861106	0.0080585	0.935832	-0.0956788	0.682466	COVID_Severe_vs_Mild	0.32032	0.165919
	CellCycle-G2M	0.481272	0.00023441	0.00241026	0.00261385	1.08447	0.116985	0.682466	COVID_Severe_vs_Mild	0.317609	0.165919
	Cytotoxic	0.485601	-0.00980671	0.0706349	0.0596377	0.844309	-0.244157	0.682466	COVID_Severe_vs_Mild	0.31372	0.165919
	Th17-2	0.514651	0.000340061	0.00554803	0.00590193	1.06379	0.0892112	0.704259	COVID_Severe_vs_Mild	0.288487	0.152268
	Treg	0.548631	0.000738243	0.0189364	0.0197903	1.04509	0.063634	0.731508	COVID_Severe_vs_Mild	0.260719	0.135781
	Mito	0.562935	0.00159101	0.0152578	0.0167455	1.0975	0.134225	0.731815	COVID_Severe_vs_Mild	0.249542	0.135598
	SOX4/TOX2	0.596347	-0.000325152	0.00790962	0.00769196	0.972482	-0.0402572	0.756343	COVID_Severe_vs_Mild	0.224501	0.121281
	CD40LG/TXNIP	0.623727	0.00150635	0.0251022	0.0266917	1.06332	0.0885747	0.772234	COVID_Severe_vs_Mild	0.205005	0.112251
	HeatShock	0.644633	-0.000455397	0.0139715	0.013634	0.975848	-0.035272	0.772468	COVID_Severe_vs_Mild	0.190688	0.11212
	HLA	0.653626	0.00110924	0.0124499	0.0134103	1.07714	0.107203	0.772468	COVID_Severe_vs_Mild	0.18467	0.11212
	IEG2	0.671632	-0.00100636	0.0204335	0.0196467	0.961492	-0.0566528	0.776108	COVID_Severe_vs_Mild	0.172869	0.110078
	YPEL5/JUNB	0.746086	-0.00098107	0.026261	0.0261419	0.995467	-0.00655451	0.843402	COVID_Severe_vs_Mild	0.127211	0.0739656
	Doublet-Fibroblast	0.785043	-0.000152351	0.00667139	0.00654118	0.980482	-0.028437	0.864003	COVID_Severe_vs_Mild	0.105107	0.0634849
	CD8-Naive	0.823534	0.0011061	0.0416465	0.0430043	1.0326	0.046285	0.864003	COVID_Severe_vs_Mild	0.0843183	0.0634849
	Th2-2	0.828128	0.00010833	0.00605084	0.00618474	1.02213	0.0315766	0.864003	COVID_Severe_vs_Mild	0.0819026	0.0634849
	TXNIP/H1FX	0.844528	-0.00020824	0.012662	0.0127254	1.00501	0.00720598	0.864003	COVID_Severe_vs_Mild	0.0733861	0.0634849
	TIMD4/TIM3-Activation	0.847387	-0.000251963	0.0133996	0.0128403	0.95826	-0.0615106	0.864003	COVID_Severe_vs_Mild	0.0719181	0.0634849
	Doublet-Platelet	0.962921	6.13622e-05	0.00656294	0.00681393	1.03824	0.0541436	0.962921	COVID_Severe_vs_Mild	0.0164095	0.0164095
AMP-RA - RA_vs_OA
	GEP	P	Beta	M0	M1	FC	log2_FC	Q	Pheno	logP	logQ
	Metallothionein	5.64817e-07	0.00181133	0.0024725	0.00428382	1.73259	0.792932	2.93705e-05	RA_vs_OA	6.24809	4.53209
	HLA	1.8884e-06	0.00627825	0.00540217	0.0116804	2.16217	1.11248	4.90984e-05	RA_vs_OA	5.72391	4.30893
	ICOS/CD38-Activation	5.98366e-06	0.00401237	0.00728589	0.0112983	1.5507	0.632924	0.000103717	RA_vs_OA	5.22303	3.98415
	ISG	0.000176277	0.00902048	0.00717229	0.0161928	2.25768	1.17484	0.00199257	RA_vs_OA	3.7538	2.70059
	Tph	0.000191594	0.0103351	0.00982357	0.0201586	2.05207	1.03708	0.00199257	RA_vs_OA	3.71762	2.70059
	CCR10-Migration	0.000308722	0.0050869	0.0106485	0.0157354	1.47771	0.563363	0.00267559	RA_vs_OA	3.51043	2.57258
	Doublet-Plasmablast	0.000400765	0.00709482	0.0168766	0.0239714	1.42039	0.506292	0.00297711	RA_vs_OA	3.39711	2.5262
	CellCycle-G2M	0.00195573	0.000902081	0.00122971	0.00213179	1.73357	0.793748	0.0127122	RA_vs_OA	2.70869	1.89578
	CellCycle-Late-S	0.00484966	0.00105766	0.00172893	0.00278659	1.61174	0.688621	0.0280203	RA_vs_OA	2.31429	1.55253
	Exhaustion	0.00795126	0.00390557	0.0101712	0.0140768	1.38398	0.468826	0.0413465	RA_vs_OA	2.09956	1.38356
	CellCycle-S	0.00942113	0.00163858	0.00484045	0.00647904	1.33852	0.420637	0.0445363	RA_vs_OA	2.0259	1.35129
	MALAT1	0.0117958	0.0152235	0.0937859	0.109009	1.16232	0.217009	0.051115	RA_vs_OA	1.92827	1.29145
	CTLA4+/CD38+-Activation	0.0134535	0.00211072	0.00753222	0.00964295	1.28023	0.356398	0.0538141	RA_vs_OA	1.87116	1.2691
	CD4-Naive	0.0171369	0.0130058	0.0194429	0.0324488	1.66892	0.738918	0.0636513	RA_vs_OA	1.76607	1.19619
	Early-Activation	0.0323706	0.00205489	0.00940037	0.0114553	1.2186	0.285221	0.112218	RA_vs_OA	1.48985	0.949938
	CD40LG/TXNIP	0.0353355	-0.0214454	0.0458422	0.0243967	0.53219	-0.909987	0.114841	RA_vs_OA	1.45179	0.939905
	CD8-EM	0.0418933	0.0139787	0.0374773	0.051456	1.37299	0.457321	0.123087	RA_vs_OA	1.37786	0.909786
	Doublet-Fibroblast	0.0426072	-0.0625835	0.0989862	0.0364027	0.367755	-1.44318	0.123087	RA_vs_OA	1.37052	0.909786
	YPEL5/JUNB	0.0489229	0.00738447	0.0161379	0.0235224	1.45759	0.54358	0.133894	RA_vs_OA	1.31049	0.873238
	CD4-CM	0.100489	0.00486856	0.0104064	0.015275	1.46784	0.553697	0.250495	RA_vs_OA	0.997881	0.601202
	Multi-Cytokine	0.101161	-0.00316763	0.0178934	0.0147258	0.822973	-0.281083	0.250495	RA_vs_OA	0.994986	0.601202
	RGCC/MYADM	0.112888	0.00676034	0.0208016	0.027562	1.32499	0.405983	0.266826	RA_vs_OA	0.947352	0.573771
	MAIT	0.11861	-0.0103115	0.0296963	0.0193848	0.652767	-0.615359	0.267401	RA_vs_OA	0.925879	0.572836
	Th2-2	0.126487	-0.00201488	0.0085623	0.00654741	0.76468	-0.387073	0.267401	RA_vs_OA	0.897955	0.572836
	Tfh-1	0.129351	0.00393805	0.00778575	0.0117238	1.5058	0.590532	0.267401	RA_vs_OA	0.888229	0.572836
	CD4-EM	0.136111	-0.00696066	0.030128	0.0231674	0.768964	-0.379012	0.267401	RA_vs_OA	0.866106	0.572836
	SOX4/TOX2	0.138843	0.000970505	0.00676917	0.00773967	1.14337	0.193294	0.267401	RA_vs_OA	0.857476	0.572836
	Doublet-Platelet	0.147159	-0.00103983	0.0050815	0.00404166	0.795369	-0.330303	0.273296	RA_vs_OA	0.832212	0.563367
	IL10/IL19-Secretion	0.154949	0.00160251	0.00956385	0.0111664	1.16756	0.223495	0.27784	RA_vs_OA	0.80981	0.556205
	Translation	0.160856	0.00784005	0.0182141	0.0260541	1.43044	0.516459	0.278818	RA_vs_OA	0.793562	0.55468
	Tfh-2	0.196416	0.00704107	0.0136423	0.0206834	1.51612	0.600383	0.329472	RA_vs_OA	0.706824	0.482182
	Cytotoxic	0.213598	-0.0367797	0.0772306	0.0404508	0.523767	-0.933002	0.3458	RA_vs_OA	0.670403	0.461176
	HeatShock	0.21945	-0.00483437	0.0256366	0.0208022	0.811427	-0.301467	0.3458	RA_vs_OA	0.658665	0.461176
	Doublet-Bcell	0.257591	-0.000826634	0.00577736	0.00495072	0.856918	-0.222771	0.393962	RA_vs_OA	0.58907	0.404545
	Th17-2	0.327725	0.000662964	0.00579593	0.00645889	1.11438	0.156247	0.486905	RA_vs_OA	0.484491	0.312556
	gdT-Blood	0.357116	-0.00300873	0.0168139	0.0138051	0.821056	-0.284447	0.515835	RA_vs_OA	0.44719	0.287489
	TIMD4/TIM3-Activation	0.379211	0.00142383	0.00806601	0.00948984	1.17652	0.234528	0.532946	RA_vs_OA	0.421119	0.273317
	Th17	0.41774	-0.00333424	0.0204419	0.0171077	0.836892	-0.256887	0.571645	RA_vs_OA	0.379094	0.242874
	Cytoskeleton	0.436729	0.00186907	0.0113395	0.0132086	1.16483	0.220117	0.582306	RA_vs_OA	0.359788	0.234849
	IEG2	0.469586	0.00348134	0.0229382	0.0264196	1.15177	0.203853	0.597859	RA_vs_OA	0.328285	0.223401
	NK-like	0.471389	-0.00354176	0.0234705	0.0199288	0.849098	-0.235998	0.597859	RA_vs_OA	0.326621	0.223401
	CD8-Trm-Like	0.494949	0.00159587	0.0203088	0.0219046	1.07858	0.109133	0.612794	RA_vs_OA	0.30544	0.212686
	CD8-Naive	0.525764	0.00173342	0.0158685	0.0176019	1.10924	0.149567	0.635808	RA_vs_OA	0.279209	0.196674
	Mito	0.588286	0.00427533	0.0296477	0.0339231	1.1442	0.194345	0.695247	RA_vs_OA	0.230411	0.157861
	Treg	0.624935	0.00367147	0.0246557	0.0283272	1.14891	0.200265	0.714788	RA_vs_OA	0.204165	0.145823
	Doublet-RBC	0.632312	4.49009e-05	0.00108163	0.00112653	1.04151	0.0586797	0.714788	RA_vs_OA	0.199068	0.145823
	OX40/EBI3-Activation	0.729477	-0.00119087	0.0147965	0.0136056	0.919517	-0.121052	0.807081	RA_vs_OA	0.136988	0.0930828
	Doublet-Myeloid	0.778656	0.000612805	0.0109749	0.0115877	1.05584	0.0783869	0.842059	RA_vs_OA	0.108654	0.0746574
	Th2-1	0.793479	0.000455478	0.0154417	0.0158972	1.0295	0.041939	0.842059	RA_vs_OA	0.100465	0.0746574
	IEG	0.816867	0.00324135	0.0344054	0.0376468	1.09421	0.12989	0.849541	RA_vs_OA	0.0878488	0.0708155
	BCL2-Survival	0.962898	9.49869e-05	0.0202072	0.0203022	1.0047	0.0067657	0.981779	RA_vs_OA	0.0164196	0.00798641
	TXNIP/H1FX	0.984007	-4.52408e-05	0.0102998	0.0102545	0.995608	-0.00635085	0.984007	RA_vs_OA	0.00700177	0.00700177
Pan-Cancer - Cancer_vs_Not
	GEP	P	Beta	M0	M1	FC	log2_FC	Q	Pheno	logP	logQ
	Treg	1.42802e-13	0.0325822	0.0165882	0.0414584	2.49927	1.32151	7.42571e-12	Cancer_Or_Not	12.8453	11.1293
	Tph	1.28296e-11	0.00965945	0.01053	0.0199009	1.88992	0.918326	3.33569e-10	Cancer_Or_Not	10.8918	9.47681
	CTLA4+/CD38+-Activation	7.86428e-11	0.00442922	0.0057477	0.00996391	1.73355	0.793728	1.3159e-09	Cancer_Or_Not	10.1043	8.88078
	TIMD4/TIM3-Activation	1.01223e-10	0.00594601	0.0075604	0.0138655	1.83396	0.874963	1.3159e-09	Cancer_Or_Not	9.99472	8.88078
	OX40/EBI3-Activation	4.70778e-10	0.0169872	0.00641516	0.0224776	3.50382	1.80893	4.89609e-09	Cancer_Or_Not	9.32718	8.31015
	ICOS/CD38-Activation	5.02449e-09	0.00531459	0.00595846	0.0106951	1.79495	0.843943	4.35456e-08	Cancer_Or_Not	8.29891	7.36106
	gdT-Blood	5.92489e-07	-0.00646631	0.0196158	0.0126057	0.642632	-0.637935	4.40135e-06	Cancer_Or_Not	6.22732	5.35641
	Mito	1.3801e-06	-0.011001	0.0247537	0.0129853	0.524581	-0.930763	8.50709e-06	Cancer_Or_Not	5.86009	5.07022
	Exhaustion	1.47238e-06	0.01814	0.011548	0.0266017	2.30358	1.20388	8.50709e-06	Cancer_Or_Not	5.83198	5.07022
	CellCycle-S	1.94111e-06	0.00697324	0.00408498	0.0128202	3.13837	1.65002	9.3531e-06	Cancer_Or_Not	5.71195	5.02904
	ISG	1.97854e-06	0.0121634	0.00791008	0.0181497	2.29451	1.19819	9.3531e-06	Cancer_Or_Not	5.70366	5.02904
	IEG	2.92177e-06	-0.0151415	0.0371576	0.0168437	0.453304	-1.14145	1.2661e-05	Cancer_Or_Not	5.53435	4.89753
	Th2-2	6.80999e-06	0.00205835	0.00508659	0.00875557	1.72131	0.783503	2.72399e-05	Cancer_Or_Not	5.16685	4.56479
	HLA	1.94685e-05	0.00838188	0.00883984	0.0166543	1.884	0.9138	7.23117e-05	Cancer_Or_Not	4.71067	4.14079
	CellCycle-Late-S	5.40574e-05	0.00407509	0.00219528	0.00722574	3.2915	1.71874	0.000187399	Cancer_Or_Not	4.26714	3.72723
	Th17-2	7.11547e-05	0.00220251	0.00438509	0.00828945	1.89037	0.91867	0.000231253	Cancer_Or_Not	4.1478	3.63591
	Cytoskeleton	9.52121e-05	0.00629449	0.00705427	0.0139604	1.979	0.984769	0.000291237	Cancer_Or_Not	4.02131	3.53575
	IL10/IL19-Secretion	0.00011715	0.00332939	0.00516258	0.00829983	1.60769	0.684989	0.000338434	Cancer_Or_Not	3.93126	3.47053
	Tfh-2	0.000130809	0.00843379	0.0108421	0.0175092	1.61493	0.691469	0.000358005	Cancer_Or_Not	3.88336	3.44611
	SOX4/TOX2	0.000189549	0.00183549	0.0053244	0.00751313	1.41108	0.496795	0.000492828	Cancer_Or_Not	3.72228	3.3073
	CD4-CM	0.000279279	0.00375151	0.00857524	0.0130616	1.52318	0.607087	0.000691548	Cancer_Or_Not	3.55396	3.16018
	CD4-EM	0.000468081	-0.00575586	0.024341	0.0162248	0.666561	-0.585191	0.00110637	Cancer_Or_Not	3.32968	2.9561
	NK-like	0.000509409	-0.00892274	0.0313958	0.0205852	0.655668	-0.608963	0.00115171	Cancer_Or_Not	3.29293	2.93866
	IEG2	0.00125116	-0.0169711	0.0541569	0.0340108	0.628004	-0.671154	0.00271085	Cancer_Or_Not	2.90269	2.56689
	CellCycle-G2M	0.00138497	0.00366229	0.00204514	0.0063314	3.09583	1.63033	0.00288073	Cancer_Or_Not	2.85856	2.5405
	Multi-Cytokine	0.00156002	-0.00608012	0.0220458	0.0130447	0.591709	-0.757041	0.00312004	Cancer_Or_Not	2.80687	2.50584
	CD40LG/TXNIP	0.00230023	-0.0161714	0.0579041	0.0322838	0.557539	-0.842857	0.00443008	Cancer_Or_Not	2.63823	2.35359
	Cytotoxic	0.00591845	-0.025853	0.0637364	0.0317222	0.497709	-1.00662	0.0109914	Cancer_Or_Not	2.22779	1.95895
	HeatShock	0.00772521	0.0186084	0.0168612	0.026412	1.56644	0.647489	0.0138521	Cancer_Or_Not	2.11209	1.85848
	Early-Activation	0.00879852	0.00578203	0.00816297	0.0163676	2.00511	1.00368	0.0152508	Cancer_Or_Not	2.05559	1.81671
	CD8-Naive	0.0203029	-0.00441791	0.0190907	0.0177449	0.929504	-0.105466	0.0340565	Cancer_Or_Not	1.69244	1.4678
	CD4-Naive	0.054644	-0.00940598	0.0310365	0.0245473	0.790917	-0.338403	0.0887966	Cancer_Or_Not	1.26246	1.0516
	Translation	0.0658389	-0.0135562	0.0615921	0.0486421	0.789746	-0.34054	0.103746	Cancer_Or_Not	1.18152	0.984028
	CD8-EM	0.0721097	-0.010341	0.0613607	0.0464	0.756184	-0.40319	0.110285	Cancer_Or_Not	1.14201	0.957482
	MAIT	0.0747896	-0.00911902	0.0333061	0.0211336	0.634527	-0.656246	0.111116	Cancer_Or_Not	1.12616	0.954223
	RGCC/MYADM	0.0972208	-0.00809603	0.0324911	0.0200169	0.616073	-0.698827	0.14043	Cancer_Or_Not	1.01224	0.85254
	YPEL5/JUNB	0.134653	-0.00425063	0.0284087	0.0185605	0.65334	-0.614095	0.189242	Cancer_Or_Not	0.870783	0.722982
	TXNIP/H1FX	0.145918	-0.002749	0.0147789	0.0110779	0.749573	-0.415858	0.199677	Cancer_Or_Not	0.835892	0.699672
	Th17	0.154532	0.00162985	0.012701	0.0152015	1.19688	0.259274	0.206043	Cancer_Or_Not	0.810981	0.686043
	Metallothionein	0.176168	-0.00542999	0.00603938	0.00162384	0.268875	-1.89499	0.229019	Cancer_Or_Not	0.754072	0.640129
	Doublet-RBC	0.22032	-0.000283558	0.00150918	0.00118643	0.786143	-0.347137	0.27943	Cancer_Or_Not	0.656946	0.553726
	CCR10-Migration	0.22617	0.00148601	0.0100355	0.0121164	1.20735	0.271842	0.28002	Cancer_Or_Not	0.645565	0.552811
	Doublet-Plasmablast	0.27524	0.00155947	0.0136457	0.0155765	1.1415	0.190926	0.332848	Cancer_Or_Not	0.560289	0.477754
	Tfh-1	0.293758	0.00404624	0.0122364	0.0119539	0.976919	-0.0336898	0.347168	Cancer_Or_Not	0.532011	0.45946
	BCL2-Survival	0.309461	0.00121847	0.0126615	0.0129873	1.02573	0.0366502	0.357599	Cancer_Or_Not	0.509394	0.446604
	Doublet-Myeloid	0.361017	-0.00251262	0.0124927	0.0118077	0.94517	-0.0813541	0.408106	Cancer_Or_Not	0.442473	0.389227
	CD8-Trm-Like	0.408719	-0.00452702	0.0408364	0.0337893	0.827431	-0.273289	0.4522	Cancer_Or_Not	0.388575	0.344669
	Doublet-Bcell	0.503649	-0.000269432	0.00418848	0.00607377	1.45011	0.536165	0.54562	Cancer_Or_Not	0.297872	0.26311
	Doublet-Fibroblast	0.550879	-0.0018576	0.0208082	0.0830127	3.98941	1.99618	0.584606	Cancer_Or_Not	0.258944	0.233136
	Doublet-Platelet	0.792657	-0.000215011	0.00390266	0.00855346	2.1917	1.13205	0.811146	Cancer_Or_Not	0.100915	0.0909012
	Th2-1	0.795547	-0.000401321	0.0118711	0.0120268	1.01312	0.0188035	0.811146	Cancer_Or_Not	0.0993344	0.0909012
	MALAT1	0.929373	-0.000754991	0.0590223	0.0493478	0.836087	-0.258275	0.929373	Cancer_Or_Not	0.03181	0.03181

## Sheet: S8 - ICI Resp. Association
Table S8. Association with immune checkpoint inhibitor response. P-values and effect sizes for associations with ICI in melanoma, non-melanoma skin cancer (NMSC), and colorectal cancer (CRC). Results for pre-treatment (Pre) or post-treatment (Post) samples only are computed as two-tailed T-tests. Results for the combination of Pre and Post samples (Both) is computed from linear regression control…
CD4
		Both							Pre					Post
		Meta-analysis	Melanoma		CRC		NMSC		Meta-analysis	Melanoma		NMSC		Meta-analysis	Melanoma		CRC		NMSC
		P	Beta	P	Beta	P	Beta	P	P	T	P	T	P	P	T	P	T	P	T	P
	CellCycle-Late-S	1.94331e-10	0.902079	0.000357783	1.95689	1.47832e-07	0.675908	0.0677767	0.00302653	2.83143	0.0183346	2.06425	0.0733878	6.2052e-05	3.44473	0.00189244	6.32551	0.00581723	0.968364	0.374919
	OX40/EBI3	3.51121e-09	0.912686	0.000496851	2.03586	1.15319e-07	-0.251581	0.586213	0.0482143	2.23281	0.0466405	0.378566	0.714422	2.04364e-05	3.0879	0.00918929	9.61412	7.10488e-05	-1.30777	0.220164
	TIMD4/TIM3	1.49609e-07	1.09514	3.9368e-05	1.47559	0.00284444	0.861264	0.0431826	0.00300003	2.72777	0.014334	1.92858	0.092946	0.000230145	3.3539	0.00515356	3.85557	0.0214466	1.57498	0.170051
	CellCycle-S	1.62818e-07	0.620229	0.00394446	1.8109	8.12618e-06	0.536323	0.16556	0.00415484	2.80863	0.0186327	1.79833	0.103236	0.00100878	2.82763	0.00882578	3.50924	0.0226037	0.655814	0.538334
	CellCycle-G2M	1.09429e-06	0.465522	0.067846	1.729	1.1117e-05	0.694652	0.0577211	0.00782446	2.2404	0.0484552	2.00055	0.0815559	0.000592928	1.59002	0.125776	6.96401	0.00150442	1.14447	0.301804
	Exhaustion	2.86082e-06	0.965312	0.00114614	1.77489	8.32692e-05	-0.199599	0.669325	0.0402112	2.44057	0.0260631	-0.035282	0.972542	0.0238637	1.71553	0.11223	3.73326	0.0317894	-0.758389	0.463541
	ICOS/CD38	5.1138e-06	0.780384	0.00275967	1.39584	0.00144888	0.784458	0.060869	0.0312837	1.40286	0.178702	1.76266	0.111041	0.00203902	2.87543	0.0133101	2.49717	0.0757782	1.29017	0.248191
	CTLA4/CD38	1.41089e-05	0.531991	0.0541161	1.61977	0.000140768	0.605274	0.10024	0.0439911	0.865967	0.398818	1.97427	0.0748017	0.0251543	1.4178	0.186986	2.83128	0.0556996	0.613249	0.564029
	Tph	1.98419e-05	0.783406	0.00539693	1.6591	0.000159805	-0.174114	0.697038	0.0018907	4.05662	0.0010686	0.339321	0.743046	0.0886788	0.798367	0.444293	3.18907	0.0447302	-0.979188	0.346816
	IEG3	7.35524e-05	-0.956217	0.0012741	-1.09508	0.0667126	-0.692917	0.0590324	0.137234	-0.914581	0.37815	-1.05045	0.323498	0.000556583	-1.97151	0.0815329	-3.41574	0.00384991	-1.48608	0.168821
	Cytoskeleton	0.000103847	0.565794	0.0102153	0.936087	0.0494508	0.935999	0.0147794	0.0595498	0.283343	0.780583	2.3038	0.055168	0.000415247	3.5218	0.00201757	1.7597	0.114556	1.6183	0.162318
	CD4-Naive	0.000158008	-0.908139	0.000993427	-0.827125	0.0993576	-0.688911	0.122948	0.00626266	-2.47833	0.034749	-1.98039	0.0881933	0.0119632	-1.51871	0.168963	-2.45762	0.0304282	-0.804685	0.436773
	NME1/FABP5	0.000215949	0.596902	0.0262242	1.35228	0.00131201	0.291225	0.507193	0.0589473	1.88746	0.0768003	0.614222	0.553801	0.00214343	2.9951	0.00590103	2.71951	0.0624428	0.373641	0.721747
	Th17-Activated	0.000352888	0.352226	0.244947	1.53434	0.000583345	0.5496	0.216866	0.0300451	1.43646	0.181782	1.77952	0.104046	0.0969732	0.134965	0.896084	2.53147	0.0781993	0.646343	0.533096
	ISG	0.000568508	0.876858	0.00270076	1.09161	0.0198844	-0.00640224	0.9882	0.115236	1.58563	0.137282	0.377795	0.712781	0.00280903	3.3005	0.00328604	1.99676	0.0828661	-0.475664	0.642856
	Cytotoxic	0.0011113	0.592234	0.0477837	1.04337	0.0221453	0.718744	0.113939	0.0942822	1.24174	0.231244	1.03367	0.328566	0.00186293	2.16143	0.0414475	2.68236	0.0405116	1.69674	0.133647
	CD8-Naive	0.00244933	-0.824932	0.00386963	-0.629624	0.230331	-0.439101	0.350869	0.0413505	-2.0491	0.0696947	-0.882829	0.397333	0.0586381	-1.485	0.173183	-1.40768	0.219102	-0.724616	0.484078
	IL10/IL19	0.00323442	0.382287	0.0772579	1.30687	0.00366998	-0.274999	0.451417	0.583226	-0.619945	0.547335	1.25335	0.242367	0.0697009	1.27059	0.214815	2.74515	0.0588197	-1.53471	0.15083
	HLA	0.00375176	0.739096	0.00549376	-0.457485	0.453008	0.738697	0.0619795	0.00459812	2.89365	0.0102758	1.36726	0.209955	0.00301295	3.79807	0.00106493	-0.877629	0.396045	1.31439	0.235688
	Metallothionein	0.00611618	0.787896	0.00823042	0.429496	0.373629	0.426152	0.31362	0.000491661	4.54021	0.00034646	0.673375	0.515231	0.0245989	2.44017	0.0220943	0.484142	0.655951	0.907002	0.393606
	Th2-Resting	0.00991853	-0.48649	0.114075	-1.19463	0.0164775	-0.0330326	0.941572	0.226456	-0.958912	0.354112	-0.448582	0.668344	0.118515	-0.395664	0.697628	-2.38738	0.0591642	0.276243	0.787792
	Th22	0.0133252	0.272096	0.370469	0.170363	0.764498	1.02179	0.00909905	0.782023	-0.0864107	0.932469	1.33658	0.209797	0.013581	1.95061	0.0657587	0.139247	0.893214	2.53887	0.0449559
	Tfh-1	0.0164854	-0.642184	0.0309822	-0.477471	0.369281	-0.399471	0.296092	0.19036	-1.32774	0.216495	-0.173141	0.866279	0.0443106	-1.20202	0.262049	-1.39028	0.185342	-1.22016	0.257639
	IEG	0.0202916	-0.552129	0.069229	-0.962353	0.0461293	0.191424	0.611358	0.108814	-1.68165	0.124092	-0.349859	0.7333	0.03668	-0.64907	0.527654	-2.82513	0.0130286	0.57136	0.589612
	CD40LG/TXNIP	0.0216523	-0.373682	0.227016	-1.02372	0.0166545	0.176114	0.723469	0.352669	0.370675	0.715469	0.518967	0.614647	0.00445405	-1.48977	0.174668	-3.41867	0.00384303	-0.0392688	0.969471
	Translation	0.0307283	-0.799504	0.00645231	0.0291236	0.961094	0.0798076	0.858161	0.0658585	-2.09364	0.061034	-0.265048	0.798087	0.327152	-1.34971	0.209452	-0.163175	0.879253	0.482059	0.643074
	Mito	0.0700574	-0.469913	0.118764	-0.301561	0.580798	-0.354089	0.341162	0.172525	-0.549465	0.592594	-1.15614	0.277941	0.22896	-1.4128	0.19027	-0.273536	0.793782	-0.114749	0.910558
	CD8-Trm	0.0708862	0.205525	0.49003	0.436851	0.386655	0.698733	0.126266	0.0477055	1.21539	0.240969	1.6085	0.136518	0.914715	-0.115658	0.910021	1.29395	0.244755	1.3539	0.206121
	IEG2	0.0734224	-0.34835	0.257705	-0.696496	0.168435	-0.235633	0.579072	0.330631	-0.114421	0.910595	-0.810844	0.439984	0.0549133	-1.15676	0.269755	-1.98418	0.0670762	-0.0948065	0.927241
	CD172a/MERTK	0.0798849	-0.441388	0.141635	-0.276806	0.589415	-0.419797	0.339182	0.142551	-0.993619	0.338364	-0.932654	0.379687	0.172299	-1.11623	0.289572	-0.581763	0.591935	-0.675619	0.5126
	SOX4/TOX2	0.0802218	0.11241	0.707837	0.984001	0.031783	-0.128887	0.733848	0.284163	0.260237	0.798959	0.867807	0.404701	0.15583	-1.22859	0.241784	1.80969	0.162001	-1.46343	0.169527
	RGCC/MYADM	0.0900683	-0.0819813	0.79078	-0.831573	0.0877908	-0.266864	0.483895	0.803317	0.0564659	0.955774	-1.55686	0.147889	0.0587571	-0.310818	0.761067	-2.59103	0.0213164	0.174237	0.8646
	Poor-Quality	0.0964508	-0.500355	0.0939089	-0.359142	0.524671	-0.117633	0.752283	0.301602	-0.550216	0.59041	-0.546853	0.595429	0.062866	-2.37675	0.0382446	-0.716802	0.501395	0.0706771	0.945012
	Multi-Cytokine	0.137905	0.377046	0.194747	0.0977213	0.872135	0.340217	0.36888	0.337165	0.674076	0.510214	0.250574	0.807655	0.0807512	1.42768	0.166318	1.05979	0.349851	0.728086	0.494132
	CD4-CM	0.139789	-0.127456	0.665316	-0.846497	0.123463	-0.114608	0.778408	0.310814	-1.14127	0.281362	0.401051	0.696214	0.788474	0.589699	0.564464	-1.84935	0.0946191	-0.749759	0.468139
	gdT	0.177781	0.238106	0.436457	0.683638	0.213354	0.00560233	0.990338	0.133859	1.51497	0.148729	0.268095	0.796591	0.712381	-0.174652	0.865264	1.02187	0.364642	-0.163043	0.8732
	Doublet-Myeloid	0.178684	-0.386671	0.171878	-0.182865	0.707624	-0.14061	0.764214	0.173263	-1.85819	0.0952158	1.19833	0.260457	0.138863	-0.840519	0.423315	-0.0153317	0.988108	-1.58133	0.151347
	Doublet-Bcell	0.183854	-0.278054	0.338567	-0.51951	0.30832	-0.0388459	0.930733	0.136493	-1.69557	0.109042	0.147997	0.885917	0.410723	-0.347837	0.734404	-0.614005	0.570966	-0.132182	0.897974
	Th17-Resting	0.234483	-0.359022	0.21503	-0.413225	0.416976	0.384927	0.405943	0.42254	-1.02994	0.321068	1.34112	0.209356	0.456745	-0.573912	0.580269	-0.568485	0.5966	0.440191	0.668266
	TEMRA	0.32793	0.1055	0.731981	0.420376	0.27589	-0.14772	0.757429	0.0513031	2.4702	0.027507	-0.406663	0.694073	0.251681	-1.9452	0.0863123	3.69735	0.00986231	-0.0847047	0.933907
	Treg	0.371743	-0.0144764	0.962481	0.917352	0.0514655	-0.607036	0.167163	0.285724	-0.423859	0.678696	-0.747289	0.480078	0.409208	0.340953	0.74022	1.29193	0.269516	-1.64845	0.12558
	Doublet-Plasmablast	0.424483	-0.406257	0.178238	0.877792	0.0616764	0.0879197	0.840462	0.631746	-0.209557	0.836521	0.426153	0.67863	0.341981	-1.53253	0.155391	1.0243	0.371387	0.0865833	0.932724
	Th1-Like	0.474657	0.114198	0.712463	-1.39309	0.00117553	0.349867	0.349124	0.469067	0.592808	0.561346	-0.265427	0.797317	0.00278459	-0.176888	0.863718	-4.97128	0.000260266	0.964382	0.373499
	Heatshock	0.482584	-0.274867	0.365316	0.280094	0.604336	0.00392534	0.992243	0.499125	0.377388	0.710613	-0.0616387	0.952109	0.474381	-0.883785	0.404724	0.359374	0.738328	-0.0354053	0.972547
	Doublet-Platelet	0.534217	0.156351	0.605591	-0.11847	0.80129	0.0612714	0.871268	0.0662567	1.06875	0.309522	1.51383	0.158541	0.634154	0.522402	0.606031	0.0715618	0.944787	-0.911479	0.384496
	CD8-EM	0.574147	0.194734	0.525413	-1.00904	0.0652803	0.166826	0.726159	0.414878	0.469939	0.644398	0.171796	0.867835	0.710402	0.307956	0.7626	-2.57961	0.0209334	0.24229	0.812699
	BCL2/FAM13A	0.583545	0.111873	0.662453	0.136824	0.678574	-0.458331	0.298106	0.0936903	-0.973557	0.345078	-1.32798	0.21845	0.73017	0.416166	0.680645	-0.558864	0.584776	-0.502986	0.629489
	Tfh-2	0.687982	0.00399358	0.988305	0.281549	0.573985	-1.01578	0.010003	0.774266	0.174997	0.863621	-1.89518	0.1077	0.0856006	-0.102298	0.919711	1.30977	0.218323	-2.9481	0.0190635
	MAIT	0.714814	-0.0185676	0.945739	-0.206508	0.705875	0.681124	0.132334	0.523667	-0.818144	0.427283	1.70027	0.117336	0.61502	-0.760136	0.469525	0.0810962	0.938737	1.18367	0.271449
	Doublet-RBC	0.780077	-0.120529	0.68665	0.52627	0.23695	0.179779	0.682614	0.628556	-0.224605	0.824964	0.441941	0.672099	0.689409	-0.494869	0.627407	1.12732	0.339757	0.114848	0.910536
	Doublet-Fibroblast	0.805218	0.128192	0.670758	-0.571145	0.235171	-0.40203	0.513664	0.295877	-0.952249	0.355666	-0.0486559	0.962087	0.696363	0.82085	0.420438	-1.36775	0.192922	-0.757638	0.467419
	Th2-Activated	0.920493	-0.0527213	0.863224	0.582508	0.131174	0.560312	0.167761	0.0201608	0.146182	0.886027	2.95142	0.0133367	0.604987	-0.623245	0.546118	2.09649	0.101215	-0.260358	0.799968
CD8
		Both							Pre					Post
		Meta-analysis	Melanoma		CRC		NMSC		Meta-analysis	Melanoma		NMSC		Meta-analysis	Melanoma		CRC		NMSC
		P	Beta	P	Beta	P	Beta	P	P	T	P	T	P	P	T	P	T	P	T	P
	Exhaustion	1.01842e-07	0.479953	0.00083951	1.93808	3.78617e-06	0.00155203	0.997425	0.0317417	2.58549	0.0196495	-0.035282	0.972542	0.0019828	2.86424	0.0103507	4.63657	0.0152165	-0.758389	0.463541
	TIMD4/TIM3	1.17063e-07	0.50071	0.000432304	1.77849	0.000152385	0.733277	0.056071	0.00572653	2.37888	0.0297783	1.92858	0.092946	0.000397996	3.02429	0.0106748	4.17358	0.019661	1.57498	0.170051
	CellCycle-G2M	7.98894e-07	0.292932	0.050188	1.85869	6.94675e-06	0.634003	0.0880745	0.00496066	2.57888	0.0288303	2.00055	0.0815559	0.000467452	1.79924	0.0843337	8.27068	0.00169449	1.14447	0.301804
	NME1/FABP5	4.88004e-06	0.415153	0.00419711	1.70379	7.05e-05	0.11402	0.780449	0.050731	2.03365	0.0639892	0.614222	0.553801	0.000863869	3.12418	0.00429601	3.18961	0.0287889	0.373641	0.721747
	OX40/EBI3	2.28011e-05	0.478836	0.00069745	1.41992	0.00149589	-0.150496	0.738726	0.0315248	2.48086	0.0280298	0.378566	0.714422	6.17594e-08	3.21451	0.00470381	11.7502	2.18943e-07	-1.30777	0.220164
	CellCycle-S	2.74392e-05	0.326343	0.0280851	1.51564	0.000556826	0.603207	0.103867	0.0141266	1.94466	0.075609	1.79833	0.103236	0.0208276	1.54492	0.139001	2.54023	0.0613113	0.655814	0.538334
	ICOS/CD38	7.8875e-05	0.394155	0.00588402	1.30371	0.00571696	0.584166	0.161646	0.030625	1.41812	0.17424	1.76266	0.111041	0.000927073	3.43173	0.00229455	1.73583	0.170503	1.29017	0.248191
	CTLA4/CD38	0.000207964	0.353034	0.0166445	1.40973	0.00221603	0.283889	0.452797	0.0710522	0.373359	0.714884	1.97427	0.0748017	0.00120446	3.29267	0.00535126	2.99719	0.0439876	0.613249	0.564029
	CD8-Naive	0.000305532	-0.495627	0.000454186	-0.31746	0.534334	-0.63867	0.107842	0.0318788	-2.27691	0.0510722	-0.882829	0.397333	0.0411382	-1.95073	0.089699	-1.21685	0.260598	-0.724616	0.484078
	CellCycle-Late-S	0.000371506	0.319036	0.0325013	1.10655	0.0182571	0.73216	0.0554711	0.010322	1.99319	0.0740083	2.06425	0.0733878	0.00129741	1.65115	0.110605	3.51855	0.00350016	0.968364	0.374919
	HLA	0.000599088	0.495175	0.000445835	-0.28728	0.602193	0.678699	0.0927643	0.0270141	1.87002	0.0794217	1.36726	0.209955	0.000782432	4.26843	0.000326429	-0.0399456	0.968688	1.31439	0.235688
	IEG3	0.00105267	-0.296224	0.046042	-1.20719	0.013339	-0.495591	0.183994	0.211752	-0.437321	0.668288	-1.05045	0.323498	0.000490649	-2.21933	0.0535642	-3.44978	0.00504965	-1.48608	0.168821
	CD4-Naive	0.00111381	-0.47513	0.000880167	-0.438424	0.390864	-0.428122	0.351406	0.00491805	-2.69159	0.0264008	-1.98039	0.0881933	0.0699771	-1.35265	0.216718	-1.30091	0.248211	-0.804685	0.436773
	Poor-Quality	0.00162017	-0.481712	0.000811406	-0.270922	0.634432	-0.335908	0.368312	0.202536	-0.978281	0.342076	-0.546853	0.595429	0.00895958	-3.84238	0.00338247	-0.828824	0.436167	0.0706771	0.945012
	CD40LG/TXNIP	0.00196381	-0.329338	0.0256566	-0.755677	0.0928014	-0.765735	0.10046	0.668583	-0.148012	0.884084	0.518967	0.614647	0.02263	-1.85505	0.102881	-2.12154	0.0512655	-0.0392688	0.969471
	Th1-Like	0.00257478	-0.303247	0.0422357	-1.20169	0.00816856	-0.01775	0.963268	0.0768725	-1.94147	0.0739137	-0.265427	0.797317	0.0489445	-0.700964	0.502857	-3.15758	0.0175184	0.964382	0.373499
	Metallothionein	0.00301195	0.421485	0.00392998	0.10335	0.8316	0.572725	0.123132	0.0618233	1.81414	0.0874955	0.673375	0.515231	0.0118633	3.0096	0.00673706	0.221296	0.837822	0.907002	0.393606
	RGCC/MYADM	0.00432989	-0.063542	0.677483	-1.25685	0.0251351	-0.740896	0.0369051	0.147234	-0.120349	0.90577	-1.55686	0.147889	0.0614218	-0.460256	0.652338	-2.79599	0.0264458	0.174237	0.8646
	Tph	0.00464463	0.225422	0.135578	1.54664	0.00319817	-0.395368	0.419428	0.0257416	2.56521	0.0211978	0.339321	0.743046	0.253323	0.188629	0.853502	2.18446	0.114914	-0.979188	0.346816
	Th17-Activated	0.00578115	0.10311	0.493798	1.19923	0.0133013	0.607957	0.136886	0.115936	0.0670786	0.947734	1.77952	0.104046	0.0642805	0.69492	0.50318	2.43742	0.0777887	0.646343	0.533096
	Cytoskeleton	0.00752657	0.276242	0.0624099	0.439969	0.364726	0.770768	0.0549172	0.688197	-0.441639	0.664641	2.3038	0.055168	0.00280918	3.3406	0.00350308	0.469267	0.64996	1.6183	0.162318
	ISG	0.0144871	0.366817	0.0119611	0.421569	0.433352	0.221498	0.553414	0.0922893	1.77845	0.103783	0.377795	0.712781	0.0229566	2.893	0.00751574	0.718086	0.510796	-0.475664	0.642856
	IEG2	0.0144944	-0.192619	0.203948	-1.01094	0.0467076	-0.452933	0.301324	0.341143	-0.0605747	0.952542	-0.810844	0.439984	0.00444146	-1.54383	0.152737	-3.35969	0.00457896	-0.0948065	0.927241
	IEG	0.014866	-0.241214	0.108342	-1.10262	0.0196563	0.191879	0.607594	0.120222	-1.62117	0.140826	-0.349859	0.7333	0.0154654	-0.611739	0.546824	-3.47516	0.00404535	0.57136	0.589612
	CD8-EM	0.0186411	-0.06597	0.6651	-1.21842	0.00497925	0.122172	0.800751	0.403611	-0.738374	0.473926	0.171796	0.867835	0.775705	0.0266391	0.97915	-2.77247	0.0292855	0.24229	0.812699
	Cytotoxic	0.0306561	0.163896	0.274296	0.189233	0.708337	0.802493	0.0392717	0.246377	0.24769	0.807894	1.03367	0.328566	0.026744	1.66103	0.118021	0.859304	0.403747	1.69674	0.133647
	Doublet-Plasmablast	0.0415138	-0.392724	0.00628455	0.347768	0.476401	0.0992047	0.803635	0.053984	-2.42834	0.028919	0.426153	0.67863	0.379879	-1.2499	0.238939	0.380753	0.721406	0.0865833	0.932724
	SOX4/TOX2	0.0504641	-0.366772	0.0116993	0.975703	0.0264659	-0.213177	0.647065	0.189337	-1.71702	0.116724	0.867807	0.404701	0.103849	-1.66685	0.124746	2.43027	0.0495378	-1.46343	0.169527
	Th17-Resting	0.052131	-0.27123	0.0711064	-0.612135	0.221689	-0.00534915	0.990931	0.245448	-1.57392	0.147477	1.34112	0.209356	0.337559	-0.785164	0.452447	-0.836946	0.438108	0.440191	0.668266
	Mito	0.0550155	-0.252128	0.0942544	-0.469565	0.414181	-0.296634	0.430875	0.202063	-0.351026	0.730539	-1.15614	0.277941	0.113936	-1.67319	0.13103	-0.879785	0.395773	-0.114749	0.910558
	Doublet-Platelet	0.0662009	-0.0400515	0.791678	-0.80212	0.0945365	-0.396383	0.290484	0.0987337	0.678025	0.507783	1.51383	0.158541	0.013608	-0.884663	0.401208	-2.68977	0.0171607	-0.911479	0.384496
	TEMRA	0.0670152	0.281641	0.058333	0.576483	0.207082	-0.699006	0.169257	0.145546	1.74086	0.101055	-0.406663	0.694073	0.231523	1.05294	0.307067	0.821991	0.427718	-0.0847047	0.933907
	CD172a/MERTK	0.07332	-0.242088	0.108555	-0.121282	0.826314	-0.490458	0.279667	0.0889656	-1.39173	0.186105	-0.932654	0.379687	0.286143	-0.725442	0.484298	-0.269641	0.80007	-0.675619	0.5126
	Doublet-Bcell	0.0966161	-0.279662	0.0617335	-0.395815	0.434542	0.223813	0.614857	0.00933101	-3.31497	0.00434078	0.147997	0.885917	0.40621	-0.171809	0.865314	-0.77739	0.474704	-0.132182	0.897974
	Tfh-2	0.0971872	0.0722899	0.635072	1.01469	0.0298665	-0.785243	0.0242527	0.448661	0.999221	0.332985	-1.89518	0.1077	0.0839258	-0.218251	0.830333	2.33594	0.0813126	-2.9481	0.0190635
	IL10/IL19	0.108853	0.0830022	0.586941	0.850228	0.0721273	-0.0268669	0.9566	0.590804	-0.596754	0.559532	1.25335	0.242367	0.13667	1.38862	0.176758	1.60165	0.189119	-1.53471	0.15083
	Doublet-Fibroblast	0.119167	-0.221995	0.142112	-0.508452	0.289287	0.130471	0.773113	0.441486	-0.477785	0.638904	-0.0486559	0.962087	0.0552874	-1.59915	0.136445	-1.15694	0.26554	-0.757638	0.467419
	Th2-Resting	0.148973	-0.151507	0.319016	-0.653749	0.179419	0.126734	0.770579	0.135965	-1.40938	0.180861	-0.448582	0.668344	0.266247	-0.358864	0.723584	-1.38938	0.200702	0.276243	0.787792
	Translation	0.151774	-0.282509	0.053879	0.229514	0.699798	0.0192629	0.966772	0.0863146	-1.91907	0.0852621	-0.265048	0.798087	0.56412	-0.722088	0.487675	0.0990672	0.926531	0.482059	0.643074
	MAIT	0.170652	-0.241234	0.107681	-0.339988	0.488381	0.434268	0.353789	0.362546	-1.23239	0.243178	1.70027	0.117336	0.404887	-0.794284	0.447754	-0.749922	0.4737	1.18367	0.271449
	gdT	0.189546	0.262313	0.0802964	-0.271122	0.614708	0.0458938	0.91599	0.297077	0.804911	0.432011	0.268095	0.796591	0.128374	2.20329	0.0383219	-0.399901	0.696037	-0.163043	0.8732
	Doublet-Myeloid	0.232406	-0.0123782	0.934818	-0.453273	0.440069	-0.589467	0.342461	0.773689	-0.0789864	0.937978	1.19833	0.260457	0.134394	-0.0407305	0.968174	-0.846356	0.411398	-1.58133	0.151347
	Th2-Activated	0.247948	-0.185802	0.207443	0.0755541	0.870134	-0.16997	0.667863	0.596759	-0.695457	0.503625	2.95142	0.0133367	0.524442	-0.729479	0.486972	0.86031	0.43786	-0.260358	0.799968
	Multi-Cytokine	0.273615	0.137628	0.364127	-0.13994	0.800541	0.303531	0.421827	0.471959	0.200749	0.843975	0.250574	0.807655	0.219942	1.30586	0.204177	-0.367362	0.722164	0.728086	0.494132
	Treg	0.321661	0.186379	0.219125	0.241996	0.591265	-0.709613	0.12719	0.153126	1.78334	0.0927321	-0.747289	0.480078	0.514612	0.228033	0.823591	0.940255	0.379078	-1.64845	0.12558
	Tfh-1	0.332359	-0.239241	0.112603	0.593914	0.213498	0.154649	0.72301	0.417652	-0.459875	0.652084	-0.173141	0.866279	0.158672	-1.40812	0.19318	0.85128	0.444071	-1.22016	0.257639
	Heatshock	0.488683	-0.160747	0.28903	0.484655	0.361535	0.0566565	0.887419	0.589779	0.0818582	0.935719	-0.0616387	0.952109	0.503921	-0.853157	0.421017	0.523139	0.63088	-0.0354053	0.972547
	CD4-CM	0.496383	0.125035	0.409287	-0.237911	0.682691	-0.0043044	0.991529	0.607506	-0.268744	0.791469	0.401051	0.696214	0.348706	1.51959	0.144985	-0.349351	0.741238	-0.749759	0.468139
	BCL2/FAM13A	0.549479	-0.00584345	0.969517	0.00775696	0.983914	-0.16501	0.681458	0.134608	-0.616897	0.546253	-1.32798	0.21845	0.740665	0.375074	0.712214	-0.55476	0.593328	-0.502986	0.629489
	Th22	0.610436	0.0735681	0.630252	-0.369794	0.542907	0.038771	0.921959	0.406332	-1.09373	0.302756	1.33658	0.209797	0.00746775	2.52867	0.0193319	-0.585232	0.575724	2.53887	0.0449559
	CD8-Trm	0.719168	0.0326089	0.823286	0.0335858	0.943154	-0.389028	0.368104	0.141211	0.0896737	0.929673	1.6085	0.136518	0.246952	0.213192	0.834491	0.126399	0.904086	1.3539	0.206121
	Doublet-RBC	0.730725	-0.0408274	0.789593	0.207311	0.654478	0.118333	0.754815	0.584432	-0.356503	0.727014	0.441941	0.672099	0.333084	0.0594568	0.953313	1.22527	0.297073	0.114848	0.910536
