# Supplementary material for: Reproducible single-cell annotation of programs underlying T cell subsets, activation states and functions
Source: Nat Methods. 2025 Sep 3;22(9):1964–80. doi: 10.1038/s41592-025-02793-1 (PMC12446064; doi:10.1038/s41592-025-02793-1)
Supplement: Supplementary file 6 — P values corresponding to Fig. 4f. [file 41592_2025_2793_MOESM6_ESM.xlsx]

## Sheet: Figure4
Gep	CD4_CM	CD4_EM	CD4_Naive	CD8_CM	CD8_EM	CD8_Naive	CD8_TEMRA	DN	DP	MAIT	Treg	gdT
BCL2/FAM13A	0.0274863	0.00705073	0.0274863	0.00328861	0.00219965	0.00219965	0.00328861	0.0274863	0.00219965	0.0274863	0.540291	0.0274863
CD172a/MERTK	0.00484876	0.0101123	0.00705073	0.0661926	0.0373364	0.0661926	0.17791	0.624206	0.0274863	0.17791	0.00219965	0.0661926
CD4-CM	0.00219965	0.00219965	0.0274863	0.0199645	0.0500435	0.0373364	0.806496	0.540291	0.17791	0.806496	0.00219965	0.111347
CD4-Naive	0.00219965	0.00328861	0.00219965	0.0143059	0.0143059	0.00219965	0.327187	0.17791	0.00705073	0.540291	0.00219965	0.0101123
CD40LG/TXNIP	0.00219965	0.00219965	0.00219965	0.00484876	0.00484876	0.111347	0.0101123	0.0500435	0.0661926	0.0500435	0.00219965	0.00219965
CD8-EM	0.0500435	0.00484876	0.902523	0.111347	0.0199645	0.806496	0.327187	0.220671	0.327187	0.220671	0.00484876	0.0661926
CD8-Naive	0.00219965	0.0199645	0.00219965	0.00219965	0.0101123	0.00219965	0.540291	0.0373364	0.00219965	0.713303	0.00219965	0.0101123
CD8-Trm	0.0274863	0.111347	0.0373364	0.270344	0.00219965	0.0373364	0.220671	0.540291	0.0199645	0.270344	0.220671	0.902523
CTLA4/CD38	0.00219965	0.00219965	0.00219965	0.00219965	0.0274863	0.00328861	0.270344	0.17791	0.00219965	0.00219965	0.00328861	0.0373364
CellCycle-G2M	0.0373364	0.00219965	0.00219965	0.0864107	0.0199645	0.00328861	0.624206	0.391267	0.00219965	0.462433	0.624206	0.00705073
CellCycle-Late-S	0.540291	0.270344	0.00705073	0.111347	0.00219965	0.0661926	0.0864107	0.111347	0.00328861	0.540291	0.540291	0.0500435
CellCycle-S	0.00219965	0.00219965	0.00219965	0.00219965	0.00219965	0.00219965	0.00328861	0.00705073	0.00219965	0.0143059	0.00705073	0.00219965
Cytoskeleton	0.00219965	0.00219965	0.00219965	0.00219965	0.00219965	0.00219965	0.00219965	0.0199645	0.00219965	0.00328861	0.00219965	0.00328861
Cytotoxic	0.141645	0.111347	0.270344	0.902523	0.0864107	0.220671	0.111347	0.0661926	0.540291	0.391267	0.0143059	0.462433
Doublet-Bcell	0.141645	0.806496	0.0373364	0.624206	0.462433	0.391267	0.713303	0.0661926	0.624206	0.220671	0.0143059	0.902523
Doublet-Fibroblast	0.00328861	0.00219965	0.00484876	0.0101123	0.0101123	0.0199645	0.902523	0.0661926	0.713303	0.462433	0.00484876	0.0500435
Doublet-Myeloid	0.111347	0.0373364	0.111347	0.0500435	0.327187	0.391267	0.111347	0.624206	0.00219965	0.624206	0.111347	1
Doublet-Plasmablast	0.327187	0.713303	0.0864107	0.902523	0.806496	0.141645	0.713303	0.17791	0.391267	0.17791	0.220671	0.391267
Doublet-Platelet	0.0661926	0.00219965	0.111347	0.391267	0.0373364	0.0864107	0.540291	0.806496	0.17791	0.0661926	0.902523	0.0864107
Doublet-RBC	0.111347	0.0373364	0.0500435	0.111347	0.902523	0.540291	0.624206	0.624206	0.17791	0.624206	0.0274863	0.713303
Exhaustion	0.00219965	0.00219965	0.00219965	0.00219965	0.00219965	0.00219965	0.0101123	0.00328861	0.00219965	0.0274863	0.00219965	0.00219965
HLA	0.00219965	0.0101123	0.00219965	0.00705073	0.141645	0.0101123	0.17791	0.0101123	0.0274863	0.0101123	0.624206	0.17791
Heatshock	0.00219965	0.00219965	0.00219965	0.00219965	0.00219965	0.00219965	0.00328861	0.00219965	0.00219965	0.0274863	0.00484876	0.00705073
ICOS/CD38	0.00219965	0.00328861	0.00219965	0.00219965	0.220671	0.00484876	0.270344	0.713303	0.00219965	0.0143059	0.0864107	0.0199645
IEG	0.111347	0.141645	0.327187	0.902523	0.624206	0.806496	0.0101123	0.391267	0.141645	0.0661926	0.00705073	0.391267
IEG2	0.00328861	0.0500435	0.806496	0.0500435	0.327187	0.00705073	0.220671	0.902523	0.391267	0.624206	0.391267	0.713303
IEG3	0.0373364	0.0864107	1	0.540291	0.0373364	0.0101123	0.0661926	0.713303	0.624206	0.141645	0.17791	0.713303
IL10/IL19	0.327187	0.0143059	0.0500435	0.391267	0.713303	0.0373364	0.806496	0.391267	0.0500435	0.0500435	0.391267	0.713303
ISG	0.00219965	0.0101123	0.0143059	0.00328861	0.111347	0.0199645	0.0661926	0.902523	0.00484876	0.0274863	0.0500435	0.0274863
MAIT	0.00219965	0.806496	0.0373364	0.462433	0.0373364	0.0864107	0.806496	0.902523	0.0500435	0.00484876	0.902523	0.540291
Metallothionein	0.00219965	0.00219965	0.00219965	0.00484876	0.00484876	0.0661926	0.0143059	0.00705073	0.00219965	0.0143059	0.00219965	0.00484876
Mito	0.806496	0.270344	0.220671	0.0864107	0.713303	0.111347	0.624206	0.141645	0.327187	0.327187	0.391267	0.462433
Multi-Cytokine	0.00219965	0.00219965	0.00219965	0.0143059	0.00219965	0.00219965	0.0500435	0.0500435	0.0373364	0.00484876	0.00328861	0.00484876
NME1/FABP5	0.00219965	0.00219965	0.00219965	0.00219965	0.00219965	0.00219965	0.00219965	0.0143059	0.00219965	0.0101123	0.00219965	0.00705073
OX40/EBI3	0.00219965	0.00219965	0.00219965	0.00219965	0.00219965	0.00219965	0.00219965	0.0500435	0.00219965	0.00328861	0.00219965	0.00219965
Poor-Quality	0.141645	0.270344	0.902523	0.141645	0.0143059	0.17791	0.327187	0.713303	0.391267	0.624206	0.624206	0.0199645
RGCC/MYADM	0.540291	0.270344	0.391267	0.111347	0.902523	0.902523	0.806496	0.391267	0.141645	0.141645	0.624206	0.391267
SOX4/TOX2	0.0373364	0.00219965	0.270344	0.270344	1	0.327187	0.0864107	0.327187	0.540291	0.624206	0.17791	0.540291
TEMRA	0.00219965	0.624206	0.00219965	0.141645	0.462433	0.00219965	0.462433	0.540291	0.17791	0.624206	0.00705073	0.540291
TIMD4/TIM3	0.00219965	0.0101123	0.00219965	0.00219965	0.327187	0.0143059	0.141645	0.540291	0.00328861	0.0661926	0.00219965	0.00328861
Tfh-1	0.111347	0.0661926	0.0101123	0.540291	0.713303	0.540291	0.902523	0.111347	1	0.327187	0.17791	0.462433
Tfh-2	0.141645	0.0864107	0.0373364	0.0199645	0.00219965	0.00328861	0.00484876	0.0500435	0.0199645	0.0661926	0.540291	0.00705073
Th1-Like	0.00219965	0.00219965	0.0143059	0.00219965	0.00219965	0.111347	0.0199645	0.0661926	0.00705073	0.0143059	0.00219965	0.00219965
Th17-Activated	0.00219965	0.0274863	0.00219965	0.0661926	1	0.0500435	0.713303	0.713303	0.0199645	0.17791	0.0101123	0.17791
Th17-Resting	0.00219965	0.391267	0.0500435	0.462433	0.0864107	0.902523	0.462433	0.713303	0.00705073	0.806496	0.0661926	0.327187
Th2-Activated	0.00219965	0.220671	0.0143059	0.0199645	0.0274863	1	0.0143059	0.0500435	0.141645	0.462433	0.270344	0.713303
Th2-Resting	0.00219965	0.0101123	0.540291	0.624206	0.540291	0.17791	0.806496	0.902523	0.17791	0.0373364	0.00219965	0.902523
Th22	0.0143059	0.902523	0.111347	0.0274863	0.624206	0.540291	0.17791	0.327187	0.17791	0.141645	0.141645	0.540291
Tph	0.00328861	0.0500435	0.00219965	0.00219965	0.00328861	0.00328861	0.00705073	0.0864107	0.00219965	0.0500435	0.00219965	0.00705073
Translation	0.0373364	0.0500435	0.0199645	0.902523	0.0500435	0.220671	0.327187	0.806496	0.17791	0.540291	0.0199645	0.0661926
Treg	0.141645	0.0101123	0.0500435	0.00219965	0.220671	0.0661926	0.0864107	0.624206	0.00705073	0.0864107	0.17791	0.0661926
gdT	0.17791	0.00328861	0.0199645	0.17791	0.0143059	0.462433	0.0864107	0.391267	0.902523	0.713303	0.713303	0.0864107
