# Supplementary material for: Reproducible single-cell annotation of programs underlying T cell subsets, activation states and functions
Source: Nat Methods. 2025 Sep 3;22(9):1964–80. doi: 10.1038/s41592-025-02793-1 (PMC12446064; doi:10.1038/s41592-025-02793-1)
Supplement: Supplementary file 7 — P values corresponding to Fig. 5h. [file 41592_2025_2793_MOESM7_ESM.xlsx]

## Sheet: Figure5
dataset	Pheno	Treg	CD4_EM	CD4_CM	DN	DP	CD8_CM	CD8_EM	gdT	MAIT	CD4_TEMRA	CD8_TEMRA	CD4_Naive	CD8_Naive
COMBAT	Covid-19	0	8.10502e-155	6.09275e-121	9.26839e-48	4.13316e-68	0	0	6.74574e-95	4.62343e-90	1.36824	4.56007e-156	0	0
	Healthy	2.64053e-202	2.96335e-75	5.13722e-78	4.94573	0.182217	2.5241	6.10229e-05	2.29379e-07	4.62136e-17	9.73151	1.40624e-56	8.62158e-165	1.70547e-46
Sparks	Control	4.28969e-32	2.73122e-43	3.54822e-26	11.942	31.69	2.57836	1.54216	6.77265	68.3035	0.268129	0.46732	3.98262e-111	9.62028e-17
	D0	0	0	0	5.38765	0.000153357	60.5197	11.3699	1.59099e-10	2.65291e-57	1.00303e-27	2.73241e-83	0	0
	D1	0	0	0	58.5934	6.5512e-05	28.2038	0.00421506	5.85161e-09	1.52249e-19	4.66976e-41	2.45868e-90	0	0
	D28	0	0	0	0.0855656	6.87351e-08	7.79409	2.47772	6.55844e-09	4.08097e-28	1.69846e-08	5.58213e-67	0	0
