# Supplementary material for: Reproducible single-cell annotation of programs underlying T cell subsets, activation states and functions
Source: Nat Methods. 2025 Sep 3;22(9):1964–80. doi: 10.1038/s41592-025-02793-1 (PMC12446064; doi:10.1038/s41592-025-02793-1)
Supplement: Supplementary file 8 — P values corresponding to Extended Data Fig. 7b. [file 41592_2025_2793_MOESM8_ESM.xlsx]

## Sheet: ExtendedDataFigure7
cancerType	Treg	Exhaustion	OX40/EBI3	Heatshock	ISG	Tfh-2	Tph	HLA	NME1/FABP5	CellCycle-S	ICOS/CD38	Cytoskeleton	TIMD4/TIM3	CD4-CM	CTLA4/CD38	CellCycle-Late-S	CellCycle-G2M	IL10/IL19	Tfh-1	SOX4/TOX2	Th17-Activated	Th2-Activated	Th22	CD172a/MERTK	CD8-Naive	IEG3	CD4-Naive	Th1-Like	Multi-Cytokine	gdT	Mito	TEMRA	CD8-Trm	RGCC/MYADM	IEG2	MAIT	Translation	CD40LG/TXNIP	IEG	Metallothionein	Cytotoxic
BC	0.0225415	0.0281385	0.00138436	0.282455	0.031706	1.19636e-16	0.373022	0.000156899	0.857373	0.57251	0.0834822	0.800241	0.601404	0.215741	4.61647e-05	0.0678049	0.0850339	0.00227321	0.146835	0.0272801	0.491274	0.428251	0.353405	0.919155	0.936868	0.825051	0.413142	0.621264	0.611405	3.93367e-07	0.832437	0.352199	0.62918	0.423627	0.274014	0.968972	0.737448	0.612405	0.228597	0.328307	0.479214
ESCA	1.23585e-08	4.50079e-07	4.38995e-08	5.08214e-06	0.000326818	3.33863e-06	1.82886e-06	0.0010712	0.00249247	7.88448e-05	3.15601e-06	0.153813	0.00219579	3.02395e-05	0.000235866	0.00217001	0.0222414	5.93405e-07	0.0709568	5.99659e-08	0.127651	0.0230419	0.0633283	0.0304546	0.131455	0.100968	0.576953	1.10012e-06	0.0139926	8.08175e-10	0.000128081	0.0146968	1.04174e-05	0.0439222	0.000101973	0.00575258	0.0284615	0.000218161	0.231373	0.989477	0.000155591
HCC	0.010331	0.0140686	0.000706003	0.463553	0.103989	0.00688021	0.0011506	0.00532489	0.0175782	0.0037183	0.000536965	0.00101214	3.80118e-05	0.00278354	0.00643467	0.0123815	0.0207189	0.00201161	0.00568067	0.0421529	0.0131312	0.00189953	0.849891	0.600141	0.467768	0.785439	0.666821	0.78676	0.654976	0.032341	0.974189	0.090146	0.672044	0.467615	0.509988	0.248597	0.324821	0.977766	0.0127502	0.926815	0.115243
RC	0.000461962	0.00818257	0.0569377	0.530666	0.000139186	0.006731	0.000651738	0.00190221	0.148765	0.034361	0.0080807	0.0290755	0.0138573	0.0164165	0.0049619	0.0375127	0.0505158	0.00164394	0.0460479	0.742941	0.253804	0.627189	0.518427	0.314438	0.0714528	0.00183753	0.00415691	0.0588861	0.0812259	0.0299187	0.00968908	0.0566096	0.0674809	0.451868	0.0234015	0.199213	0.0544889	0.0633847	0.000607315	0.0353262	0.313575
THCA	0.0363215	0.0299174	0.00132851	0.825215	0.0539123	0.787985	0.00123689	0.00549532	0.0117127	0.000139349	0.0640139	0.265832	0.00839983	0.726014	0.000268317	0.00499752	0.0058465	0.634083	0.79669	0.837109	5.33386e-06	0.000573713	0.00822961	0.397334	0.0324405	0.816726	0.0826681	0.295456	0.050887	0.864813	0.0205292	0.204869	0.786706	0.255226	0.776959	0.271748	0.405612	0.133327	0.0413882	0.982927	0.0876957
UCEC	0.0492136	0.0188926	0.000822212	0.0735503	0.0801564	0.0320052	0.0854436	0.121098	0.186719	0.0598468	0.00823861	0.00453965	0.000466247	0.248973	0.0484238	0.0739827	0.0406201	0.0297431	0.0577545	0.243367	0.110358	0.022643	0.0335207	0.974744	0.61302	0.102951	0.635838	0.893458	0.346846	0.00518253	0.06195	0.0805738	0.465422	0.438519	0.00171098	0.381058	0.739239	0.843913	0.56805	0.210893	0.0239316
